# Supplementary material
Source: MDPI journal article supplement (https://www.mdpi.com/1099-4300/15/5/1887)
Supplement: s1 [file s1]

(* Content-type: application/vnd.wolfram.mathematica *)

(*** Wolfram Notebook File ***)
(* http://www.wolfram.com/nb *)

(* CreatedBy='Mathematica 8.0' *)

(*CacheID: 234*)
(* Internal cache information:
NotebookFileLineBreakTest
NotebookFileLineBreakTest
NotebookDataPosition[       157,          7]
NotebookDataLength[    954013,      23621]
NotebookOptionsPosition[    949036,      23462]
NotebookOutlinePosition[    950007,      23493]
CellTagsIndexPosition[    949964,      23490]
WindowFrame->Normal*)

(* Beginning of Notebook Content *)
Notebook[{

Cell[CellGroupData[{
Cell["\<\
Quantifying Morphological Computation\
\>", "Title",
 CellChangeTimes->{{3.5657257849111567`*^9, 3.56572580088453*^9}, {
  3.568390192639484*^9, 3.568390195146963*^9}}],

Cell["Keyan Zahedi & Nihat Ay", "Subsubtitle",
 CellChangeTimes->{{3.568390169537931*^9, 3.568390198803013*^9}}],

Cell[CellGroupData[{

Cell["Preface", "Section",
 CellChangeTimes->{{3.538989903199465*^9, 3.53898991002911*^9}}],

Cell[BoxData[{
 RowBox[{"Needs", "[", "\"\<ErrorBarPlots`\>\"", "]"}], "\n", 
 RowBox[{
  RowBox[{"Needs", "[", "\"\<PlotLegends`\>\"", "]"}], 
  "\[IndentingNewLine]"}], "\[IndentingNewLine]", 
 RowBox[{
  RowBox[{
  "exportDir", "=", 
   "\"\</Users/zahedi/TeX/publications/open/morphcomp/images/\>\""}], 
  ";"}]}], "Input",
 InitializationCell->True,
 InitializationGroup->True,
 CellChangeTimes->{{3.538989962123258*^9, 3.538989962461206*^9}, {
   3.538990037162409*^9, 3.538990072327238*^9}, 3.5389934470165453`*^9, 
   3.538993499741837*^9, {3.5390020387053022`*^9, 3.539002041552042*^9}, {
   3.539002089982586*^9, 3.539002093651525*^9}, {3.539070396479631*^9, 
   3.539070406277314*^9}, {3.566544942923581*^9, 3.566544954229653*^9}}]
}, Open  ]],

Cell[CellGroupData[{

Cell["Binary Model", "Section",
 CellChangeTimes->{{3.5417460753782873`*^9, 3.541746081990231*^9}, {
  3.541746973409639*^9, 3.5417469771716213`*^9}, {3.542608175646306*^9, 
  3.542608176099634*^9}}],

Cell[CellGroupData[{

Cell["Full Model", "Subsection",
 CellChangeTimes->{{3.5426081844447603`*^9, 3.5426081879040947`*^9}, {
  3.543125917335021*^9, 3.543125917998774*^9}}],

Cell[BoxData[{
 RowBox[{
  RowBox[{
   RowBox[{
    SubscriptBox["\[Alpha]", "full"], "[", 
    RowBox[{"w2_", ",", "w1_", ",", "a1_", ",", "\[Phi]_", ",", "\[Psi]_"}], 
    "]"}], ":=", 
   RowBox[{"N", "[", 
    RowBox[{
     RowBox[{"Exp", "[", 
      RowBox[{
       RowBox[{"\[Phi]", "*", "w2", "*", "w1"}], "+", 
       RowBox[{"\[Psi]", "*", "w2", "*", "a1"}]}], "]"}], " ", "/", " ", 
     RowBox[{"(", 
      RowBox[{
       RowBox[{"Exp", "[", 
        RowBox[{
         RowBox[{
          RowBox[{"-", "\[Phi]"}], "*", "w1"}], "-", 
         RowBox[{"\[Psi]", "*", "a1"}]}], "]"}], "+", 
       RowBox[{"Exp", "[", 
        RowBox[{
         RowBox[{"\[Phi]", " ", "*", "w1"}], " ", "+", 
         RowBox[{"\[Psi]", "*", "a1"}]}], " ", "]"}]}], ")"}]}], "]"}]}], 
  ";"}], "\[IndentingNewLine]", 
 RowBox[{
  RowBox[{
   RowBox[{
    SubscriptBox["\[Beta]", "full"], "[", 
    RowBox[{"s1_", ",", "w1_", ",", "\[Zeta]_"}], "]"}], ":=", 
   RowBox[{"N", "[", 
    RowBox[{
     RowBox[{"Exp", "[", 
      RowBox[{"s1", "*", "w1", "*", "\[Zeta]"}], "]"}], "/", 
     RowBox[{"(", 
      RowBox[{
       RowBox[{"Exp", "[", 
        RowBox[{"w1", "*", "\[Zeta]"}], "]"}], " ", "+", " ", 
       RowBox[{"Exp", "[", 
        RowBox[{
         RowBox[{"-", "w1"}], "*", "\[Zeta]"}], "]"}]}], ")"}]}], "]"}]}], 
  ";"}], "\[IndentingNewLine]", 
 RowBox[{
  RowBox[{
   RowBox[{
    SubscriptBox["\[CapitalPi]", "full"], "[", 
    RowBox[{"a1_", ",", "s1_", ",", "\[Mu]_"}], "]"}], ":=", 
   RowBox[{"N", "[", 
    RowBox[{
     RowBox[{"Exp", "[", 
      RowBox[{"a1", "*", "s1", "*", "\[Mu]"}], "]"}], "/", 
     RowBox[{"(", 
      RowBox[{
       RowBox[{"Exp", "[", 
        RowBox[{"s1", "*", "\[Mu]"}], "]"}], " ", "+", " ", 
       RowBox[{"Exp", "[", 
        RowBox[{
         RowBox[{"-", "s1"}], "*", "\[Mu]"}], "]"}]}], ")"}]}], "]"}]}], 
  ";"}], "\[IndentingNewLine]", 
 RowBox[{
  RowBox[{
   RowBox[{
    RowBox[{
     SubscriptBox["p", "full"], "[", 
     RowBox[{"w_", ",", "\[Tau]_"}], "]"}], ":=", 
    RowBox[{"N", "[", 
     RowBox[{
      RowBox[{"Exp", "[", 
       RowBox[{"\[Tau]", "*", "w"}], "]"}], "/", 
      RowBox[{"(", 
       RowBox[{
        RowBox[{"Exp", "[", "\[Tau]", "]"}], "+", 
        RowBox[{"Exp", "[", 
         RowBox[{"-", "\[Tau]"}], "]"}]}], ")"}]}], "]"}]}], ";"}], 
  "\[IndentingNewLine]"}], "\[IndentingNewLine]", 
 RowBox[{
  RowBox[{
   SubscriptBox["model", "full"], "=", 
   RowBox[{"{", 
    RowBox[{
     SubscriptBox["\[Alpha]", "full"], ",", 
     SubscriptBox["\[Beta]", "full"], ",", 
     SubscriptBox["\[CapitalPi]", "full"], ",", 
     SubscriptBox["p", "full"]}], "}"}]}], ";"}]}], "Input",
 InitializationCell->True,
 CellChangeTimes->{{3.5431262987530107`*^9, 3.543126301925817*^9}, {
  3.543126365980702*^9, 3.543126444409107*^9}, {3.543126501378002*^9, 
  3.543126552076808*^9}, {3.543126616298377*^9, 3.5431266400180397`*^9}, {
  3.54312667667695*^9, 3.543126694426936*^9}, {3.543127091347571*^9, 
  3.543127101208132*^9}, {3.543129518833799*^9, 3.543129543667491*^9}}]
}, Open  ]],

Cell[CellGroupData[{

Cell["Probability Distributions", "Subsection",
 CellChangeTimes->{{3.5426081844447603`*^9, 3.5426081879040947`*^9}, {
  3.543125917335021*^9, 3.543125917998774*^9}, {3.56572664684723*^9, 
  3.565726654822946*^9}}],

Cell[BoxData[
 RowBox[{
  RowBox[{"(*", " ", "\[IndentingNewLine]", "\[IndentingNewLine]", 
   RowBox[{
    RowBox[{"model", "=", 
     RowBox[{"{", 
      RowBox[{
      "\[Alpha]", ",", " ", "\[Beta]", ",", " ", "\[CapitalPi]", ",", " ", 
       "p"}], "}"}]}], ";", "\[IndentingNewLine]", 
    RowBox[{
     RowBox[{"model", "[", 
      RowBox[{"[", "1", "]"}], "]"}], " ", "=", " ", 
     RowBox[{"\[Alpha]", 
      RowBox[{"(", 
       RowBox[{
        RowBox[{
         RowBox[{"w", "'"}], "|", "w"}], ",", "a"}], ")"}]}]}], ";", 
    "\[IndentingNewLine]", 
    RowBox[{
     RowBox[{"model", "[", 
      RowBox[{"[", "2", "]"}], "]"}], " ", "=", " ", 
     RowBox[{"\[Beta]", 
      RowBox[{"(", 
       RowBox[{"s", "|", "w"}], ")"}]}]}], ";", "\[IndentingNewLine]", 
    RowBox[{
     RowBox[{"model", "[", 
      RowBox[{"[", "3", "]"}], "]"}], " ", "=", " ", 
     RowBox[{"\[CapitalPi]", 
      RowBox[{"(", 
       RowBox[{"a", "|", "s"}], ")"}]}]}], ";", "\[IndentingNewLine]", 
    RowBox[{
     RowBox[{"model", "[", 
      RowBox[{"[", "4", "]"}], "]"}], " ", "=", " ", 
     RowBox[{"p", 
      RowBox[{"(", "w", ")"}]}]}], ";"}], "\[IndentingNewLine]", 
   "\[IndentingNewLine]", "*)"}], "\[IndentingNewLine]", 
  "\[IndentingNewLine]", 
  RowBox[{
   RowBox[{
    RowBox[{
     RowBox[{"\[Alpha]", "[", "model_", "]"}], ":=", 
     RowBox[{"model", "[", 
      RowBox[{"[", "1", "]"}], "]"}]}], ";"}], "\[IndentingNewLine]", 
   RowBox[{
    RowBox[{
     RowBox[{"\[Beta]", "[", "model_", "]"}], ":=", 
     RowBox[{"model", "[", 
      RowBox[{"[", "2", "]"}], "]"}]}], ";"}], "\[IndentingNewLine]", 
   RowBox[{
    RowBox[{
     RowBox[{"\[CapitalPi]", "[", "model_", "]"}], ":=", 
     RowBox[{"model", "[", 
      RowBox[{"[", "3", "]"}], "]"}]}], ";"}], "\[IndentingNewLine]", 
   RowBox[{
    RowBox[{
     RowBox[{"p", "[", "model_", "]"}], ":=", 
     RowBox[{"model", "[", 
      RowBox[{"[", "4", "]"}], "]"}]}], ";"}], "\[IndentingNewLine]", 
   "\[IndentingNewLine]", 
   RowBox[{"(*", " ", 
    RowBox[{"checked", " ", "18.04", ".12"}], " ", "*)"}], 
   "\[IndentingNewLine]", 
   RowBox[{
    RowBox[{
     RowBox[{"sensorDistribution", "[", 
      RowBox[{"s1_", ",", "\[Zeta]_", ",", "\[Tau]_", ",", "model_"}], "]"}], 
     ":=", 
     RowBox[{"Sum", "[", 
      RowBox[{
       RowBox[{
        RowBox[{
         RowBox[{"\[Beta]", "[", "model", "]"}], "[", 
         RowBox[{"s1", ",", "w1", ",", "\[Zeta]"}], "]"}], "*", 
        RowBox[{
         RowBox[{"p", "[", "model", "]"}], "[", 
         RowBox[{"w1", ",", "\[Tau]"}], "]"}]}], ",", 
       RowBox[{"{", 
        RowBox[{"w1", ",", 
         RowBox[{"{", 
          RowBox[{
           RowBox[{"-", "1"}], ",", "1"}], "}"}]}], "}"}]}], "]"}]}], ";"}], 
   " ", "\[IndentingNewLine]", "\[IndentingNewLine]", 
   RowBox[{"(*", " ", 
    RowBox[{"checked", " ", "18.04", ".12"}], " ", "*)"}], 
   "\[IndentingNewLine]", 
   RowBox[{"(*", " ", 
    RowBox[{
     RowBox[{"p", 
      RowBox[{"(", 
       RowBox[{
        RowBox[{
         RowBox[{"s", "'"}], "|", "s"}], ",", "a"}], ")"}]}], " ", "=", " ", 
     RowBox[{
      SubscriptBox["\[Sum]", 
       RowBox[{" ", 
        RowBox[{"w", ",", 
         RowBox[{"w", "'"}]}]}]], " ", 
      RowBox[{"\[Beta]", 
       RowBox[{"(", 
        RowBox[{"s", "|", "w"}], ")"}], " ", "\[Alpha]", 
       RowBox[{"(", 
        RowBox[{
         RowBox[{
          RowBox[{"w", "'"}], "|", "w"}], ",", "a"}], ")"}], " ", "\[Beta]", 
       RowBox[{"(", 
        RowBox[{
         RowBox[{"s", "'"}], "|", 
         RowBox[{"w", "'"}]}], ")"}], " ", "p", 
       RowBox[{"(", "w", ")"}], "  ", 
       FractionBox["1", 
        RowBox[{
         SubscriptBox["\[Sum]", 
          RowBox[{" ", 
           RowBox[{"w", "''"}]}]], " ", 
         RowBox[{"\[Beta]", 
          RowBox[{"(", 
           RowBox[{"s", "|", 
            RowBox[{"w", "''"}]}], ")"}], " ", "p", 
          RowBox[{"(", 
           RowBox[{"w", "''"}], ")"}]}]}]]}]}]}], "   ", "*)"}], 
   "\[IndentingNewLine]", 
   RowBox[{
    RowBox[{
     RowBox[{"worldModel", "[", 
      RowBox[{
      "s2_", ",", "s1_", ",", "a1_", ",", "\[Zeta]_", ",", "\[Phi]_", ",", 
       "\[Psi]_", ",", "\[Tau]_", ",", "model_"}], "]"}], ":=", 
     RowBox[{"Sum", "[", "\[IndentingNewLine]", 
      RowBox[{
       RowBox[{
        RowBox[{
         RowBox[{"\[Beta]", "[", "model", "]"}], "[", 
         RowBox[{"s1", ",", "w1", ",", "\[Zeta]"}], "]"}], " ", 
        RowBox[{
         RowBox[{"\[Alpha]", "[", "model", "]"}], "[", 
         RowBox[{"w2", ",", "w1", ",", "a1", ",", "\[Phi]", ",", "\[Psi]"}], 
         "]"}], "*", 
        RowBox[{
         RowBox[{"\[Beta]", "[", "model", "]"}], "[", 
         RowBox[{"s2", ",", "w2", ",", "\[Zeta]"}], "]"}], "*", 
        RowBox[{
         RowBox[{"p", "[", "model", "]"}], "[", 
         RowBox[{"w1", ",", "\[Tau]"}], "]"}], "*", 
        RowBox[{"(", 
         RowBox[{"1", "/", 
          RowBox[{"Sum", "[", " ", 
           RowBox[{
            RowBox[{
             RowBox[{
              RowBox[{"\[Beta]", "[", "model", "]"}], "[", 
              RowBox[{"s1", ",", "w3", ",", "\[Zeta]"}], "]"}], "*", 
             RowBox[{
              RowBox[{"p", "[", "model", "]"}], "[", 
              RowBox[{"w3", ",", "\[Tau]"}], "]"}]}], ",", 
            RowBox[{"{", 
             RowBox[{"w3", ",", 
              RowBox[{"{", 
               RowBox[{
                RowBox[{"-", "1"}], ",", "1"}], "}"}]}], "}"}]}], "]"}]}], 
         ")"}]}], ",", "\[IndentingNewLine]", 
       RowBox[{"{", 
        RowBox[{"w1", ",", 
         RowBox[{"{", 
          RowBox[{
           RowBox[{"-", "1"}], ",", "1"}], "}"}]}], "}"}], ",", 
       RowBox[{"{", 
        RowBox[{"w2", ",", 
         RowBox[{"{", 
          RowBox[{
           RowBox[{"-", "1"}], ",", "1"}], "}"}]}], "}"}]}], "]"}]}], ";"}], 
   "\[IndentingNewLine]", "\[IndentingNewLine]", 
   RowBox[{"(*", " ", 
    RowBox[{"checked", " ", "18.04", ".12"}], " ", "*)"}], 
   "\[IndentingNewLine]", 
   RowBox[{"(*", " ", 
    RowBox[{
     RowBox[{"p", 
      RowBox[{"(", 
       RowBox[{
        RowBox[{"s", "'"}], "|", 
        RowBox[{"do", 
         RowBox[{"(", "a", ")"}]}]}], ")"}]}], " ", "=", " ", 
     RowBox[{
      SubscriptBox["\[Sum]", 
       RowBox[{" ", "s"}]], " ", 
      RowBox[{"p", 
       RowBox[{"(", 
        RowBox[{
         RowBox[{
          RowBox[{"s", "'"}], "|", "s"}], ",", "a"}], ")"}], "p", 
       RowBox[{"(", "s", ")"}]}]}]}], " ", "*)"}], "\[IndentingNewLine]", 
   RowBox[{
    RowBox[{
     RowBox[{"psdoa", "[", 
      RowBox[{
      "s2_", ",", "a1_", ",", "\[Zeta]_", ",", "\[Phi]_", ",", "\[Psi]_", ",",
        "\[Tau]_", ",", "model_"}], "]"}], ":=", 
     RowBox[{"Sum", "[", 
      RowBox[{
       RowBox[{
        RowBox[{"worldModel", "[", 
         RowBox[{
         "s2", ",", "s1", ",", "a1", ",", "\[Zeta]", ",", "\[Phi]", ",", 
          "\[Psi]", ",", "\[Tau]", ",", "model"}], "]"}], "*", 
        RowBox[{"sensorDistribution", "[", 
         RowBox[{"s1", ",", "\[Zeta]", ",", "\[Tau]", ",", "model"}], "]"}]}],
        ",", 
       RowBox[{"{", 
        RowBox[{"s1", ",", 
         RowBox[{"{", 
          RowBox[{
           RowBox[{"-", "1"}], ",", "1"}], "}"}]}], "}"}]}], "]"}]}], ";"}], 
   "\[IndentingNewLine]", "\[IndentingNewLine]", 
   RowBox[{"(*", " ", 
    RowBox[{"checked", " ", "18.04", ".12"}], " ", "*)"}], 
   "\[IndentingNewLine]", 
   RowBox[{"(*", " ", 
    RowBox[{
     RowBox[{"p", 
      RowBox[{"(", 
       RowBox[{
        RowBox[{"s", "'"}], "|", 
        RowBox[{"do", 
         RowBox[{"(", "s", ")"}]}]}], ")"}]}], " ", "=", " ", 
     RowBox[{
      SubscriptBox["\[Sum]", 
       RowBox[{" ", "a"}]], " ", 
      RowBox[{"\[CapitalPi]", 
       RowBox[{"(", 
        RowBox[{"a", "|", "s"}], ")"}], " ", 
       RowBox[{
        SubscriptBox["\[Sum]", 
         RowBox[{" ", 
          RowBox[{"s", "''"}]}]], " ", 
        RowBox[{"p", 
         RowBox[{"(", 
          RowBox[{
           RowBox[{
            RowBox[{"s", "'"}], "|", 
            RowBox[{"s", "''"}]}], ",", "a"}], ")"}], " ", "p", 
         RowBox[{"(", 
          RowBox[{"s", "''"}], ")"}]}]}]}]}]}], " ", "*)"}], 
   "\[IndentingNewLine]", 
   RowBox[{
    RowBox[{
     RowBox[{"psdos", "[", 
      RowBox[{
      "s2_", ",", "s1_", ",", "\[Zeta]_", ",", "\[Phi]_", ",", "\[Psi]_", ",",
        "\[Tau]_", ",", "\[Mu]_", ",", "model_"}], "]"}], ":=", 
     "\[IndentingNewLine]", 
     RowBox[{"Sum", "[", 
      RowBox[{
       RowBox[{
        RowBox[{
         RowBox[{"\[CapitalPi]", "[", "model", "]"}], "[", 
         RowBox[{"a1", ",", "s1", ",", "\[Mu]"}], "]"}], "*", 
        RowBox[{"Sum", "[", 
         RowBox[{
          RowBox[{
           RowBox[{"worldModel", "[", 
            RowBox[{
            "s2", ",", "s3", ",", "a1", ",", "\[Zeta]", ",", "\[Phi]", ",", 
             "\[Psi]", ",", "\[Tau]", ",", "model"}], "]"}], "*", 
           RowBox[{"sensorDistribution", "[", 
            RowBox[{"s3", ",", "\[Zeta]", ",", "\[Tau]", ",", "model"}], 
            "]"}]}], ",", 
          RowBox[{"{", 
           RowBox[{"s3", ",", 
            RowBox[{"{", 
             RowBox[{
              RowBox[{"-", "1"}], ",", "1"}], "}"}]}], "}"}]}], "]"}]}], ",", 
       
       RowBox[{"{", 
        RowBox[{"a1", ",", 
         RowBox[{"{", 
          RowBox[{
           RowBox[{"-", "1"}], ",", "1"}], "}"}]}], "}"}]}], "]"}]}], ";"}], 
   "\[IndentingNewLine]", "\[IndentingNewLine]", 
   RowBox[{"(*", " ", 
    RowBox[{"checked", " ", "18.04", ".12"}], " ", "*)"}], 
   "\[IndentingNewLine]", 
   RowBox[{"(*", " ", 
    RowBox[{
     RowBox[{"p", 
      RowBox[{"(", "a", ")"}]}], " ", "=", " ", 
     RowBox[{
      SubscriptBox["\[Sum]", 
       RowBox[{" ", "s"}]], " ", 
      RowBox[{"\[CapitalPi]", 
       RowBox[{"(", 
        RowBox[{"a", "|", "s"}], ")"}], "p", 
       RowBox[{"(", "s", ")"}]}]}]}], " ", "*)"}], "\[IndentingNewLine]", 
   RowBox[{
    RowBox[{
     RowBox[{"pa", "[", 
      RowBox[{
      "a1_", ",", "\[Mu]_", ",", "\[Zeta]_", ",", "\[Tau]_", ",", "model_"}], 
      "]"}], ":=", 
     RowBox[{"Sum", "[", 
      RowBox[{
       RowBox[{
        RowBox[{
         RowBox[{"\[CapitalPi]", "[", "model", "]"}], "[", 
         RowBox[{"a1", ",", "s1", ",", "\[Mu]"}], "]"}], "*", 
        RowBox[{"sensorDistribution", "[", 
         RowBox[{"s1", ",", "\[Zeta]", ",", "\[Tau]", ",", "model"}], "]"}]}],
        ",", 
       RowBox[{"{", 
        RowBox[{"s1", ",", 
         RowBox[{"{", 
          RowBox[{
           RowBox[{"-", "1"}], ",", "1"}], "}"}]}], "}"}]}], "]"}]}], ";"}], 
   "\[IndentingNewLine]", "\[IndentingNewLine]", 
   RowBox[{"(*", " ", 
    RowBox[{"checked", " ", "18.04", ".12"}], "*)"}], "\[IndentingNewLine]", 
   RowBox[{"(*", " ", 
    RowBox[{
     RowBox[{"p", 
      RowBox[{"(", 
       RowBox[{
        RowBox[{"s", "'"}], "|", "s"}], ")"}]}], " ", "=", " ", 
     RowBox[{
      SubscriptBox["\[Sum]", 
       RowBox[{" ", "a"}]], " ", 
      RowBox[{"p", 
       RowBox[{"(", 
        RowBox[{
         RowBox[{
          RowBox[{"s", "'"}], "|", "s"}], ",", "a"}], ")"}], "p", 
       RowBox[{"(", 
        RowBox[{"a", "|", "s"}], ")"}]}]}]}], " ", "*)"}], 
   "\[IndentingNewLine]", 
   RowBox[{
    RowBox[{"psgivens", "[", 
     RowBox[{
     "s2_", ",", "s1_", ",", "\[Zeta]_", ",", "\[Phi]_", ",", "\[Psi]_", ",", 
      "\[Tau]_", ",", "\[Mu]_", ",", "model_"}], "]"}], ":=", 
    RowBox[{"Sum", "[", 
     RowBox[{
      RowBox[{
       RowBox[{"worldModel", "[", 
        RowBox[{
        "s2", ",", "s1", ",", "a", ",", "\[Zeta]", ",", "\[Phi]", ",", 
         "\[Psi]", ",", "\[Tau]", ",", "model"}], "]"}], "*", 
       RowBox[{
        RowBox[{"model", "[", 
         RowBox[{"[", "3", "]"}], "]"}], "[", 
        RowBox[{"a", ",", "s1", ",", "\[Mu]"}], "]"}]}], ",", 
      RowBox[{"{", 
       RowBox[{"a", ",", 
        RowBox[{"{", 
         RowBox[{
          RowBox[{"-", "1"}], ",", "1"}], "}"}]}], "}"}]}], "]"}]}], 
   "\[IndentingNewLine]", "\[IndentingNewLine]", 
   RowBox[{"(*", " ", 
    RowBox[{
     RowBox[{"p", 
      RowBox[{"(", 
       RowBox[{
        RowBox[{"s", "'"}], "|", "a"}], ")"}]}], " ", "=", " ", 
     RowBox[{
      SubscriptBox["\[Sum]", 
       RowBox[{" ", "s"}]], " ", 
      RowBox[{"p", 
       RowBox[{
        RowBox[{"(", 
         RowBox[{
          RowBox[{"s", "'"}], ",", "s", ",", "a"}], ")"}], "/", "p"}], 
       RowBox[{"(", "a", ")"}]}]}]}], " ", "*)"}], "\[IndentingNewLine]", 
   RowBox[{
    RowBox[{"psprimegivena", "[", 
     RowBox[{
     "s2_", ",", "a1_", ",", "\[Zeta]_", ",", "\[Phi]_", ",", "\[Psi]_", ",", 
      "\[Tau]_", ",", "\[Mu]_", ",", "model_"}], "]"}], ":=", 
    RowBox[{"Sum", "[", 
     RowBox[{
      RowBox[{
       RowBox[{"worldModel", "[", 
        RowBox[{
        "s2", ",", "s1", ",", "a1", ",", "\[Zeta]", ",", "\[Phi]", ",", 
         "\[Psi]", ",", "\[Tau]", ",", "model"}], "]"}], "*", 
       RowBox[{
        RowBox[{"model", "[", 
         RowBox[{"[", "3", "]"}], "]"}], "[", 
        RowBox[{"a1", ",", "s1", ",", "\[Mu]"}], "]"}], "*", 
       RowBox[{
        RowBox[{"sensorDistribution", "[", 
         RowBox[{"s1", ",", "\[Zeta]", ",", "\[Tau]", ",", "model"}], "]"}], 
        "/", 
        RowBox[{"pa", "[", 
         RowBox[{
         "a1", ",", "\[Mu]", ",", "\[Zeta]", ",", "\[Tau]", ",", "model"}], 
         "]"}]}]}], ",", 
      RowBox[{"{", 
       RowBox[{"s1", ",", 
        RowBox[{"{", 
         RowBox[{
          RowBox[{"-", "1"}], ",", "1"}], "}"}]}], "}"}]}], "]"}]}], 
   "\[IndentingNewLine]", "\[IndentingNewLine]", 
   RowBox[{"(*", " ", "*)"}], "\[IndentingNewLine]", 
   RowBox[{
    RowBox[{"psgivensHAT", "[", 
     RowBox[{
     "s2_", ",", "s1_", ",", "\[Zeta]_", ",", "\[Phi]_", ",", "\[Psi]_", ",", 
      "\[Tau]_", ",", "\[Mu]_", ",", "model_"}], "]"}], ":=", 
    RowBox[{"Sum", "[", "\[IndentingNewLine]", 
     RowBox[{
      RowBox[{
       RowBox[{
        RowBox[{"model", "[", 
         RowBox[{"[", "3", "]"}], "]"}], "[", 
        RowBox[{"a1", ",", "s1", ",", "\[Mu]"}], "]"}], "*", 
       RowBox[{"worldModel", "[", 
        RowBox[{
        "s2", ",", "s3", ",", "a1", ",", "\[Zeta]", ",", "\[Phi]", ",", 
         "\[Psi]", ",", "\[Tau]", ",", "model"}], "]"}], "*", 
       RowBox[{
        RowBox[{"model", "[", 
         RowBox[{"[", "3", "]"}], "]"}], "[", 
        RowBox[{"a1", ",", "s3", ",", "\[Mu]"}], "]"}], " ", "*", " ", 
       RowBox[{
        RowBox[{"sensorDistribution", "[", 
         RowBox[{"s3", ",", "\[Zeta]", ",", "\[Tau]", ",", "model"}], "]"}], 
        " ", "/", " ", 
        RowBox[{"pa", "[", 
         RowBox[{
         "a1", ",", "\[Mu]", ",", "\[Zeta]", ",", "\[Tau]", ",", "model"}], 
         "]"}]}]}], ",", 
      RowBox[{"{", 
       RowBox[{"a1", ",", 
        RowBox[{"{", 
         RowBox[{
          RowBox[{"-", "1"}], ",", "1"}], "}"}]}], "}"}], ",", 
      RowBox[{"{", 
       RowBox[{"s3", ",", 
        RowBox[{"{", 
         RowBox[{
          RowBox[{"-", "1"}], ",", "1"}], "}"}]}], "}"}]}], "]"}]}], 
   "\[IndentingNewLine]", "\[IndentingNewLine]", 
   RowBox[{"(*", " ", 
    RowBox[{
     RowBox[{"p", 
      RowBox[{"(", 
       RowBox[{
        RowBox[{"w", "'"}], ",", "w", ",", "a"}], ")"}]}], " ", "=", " ", 
     RowBox[{"p", 
      RowBox[{"(", 
       RowBox[{
        RowBox[{
         RowBox[{"w", "'"}], "|", "w"}], ",", "a"}], ")"}], " ", "p", 
      RowBox[{"(", 
       RowBox[{"a", "|", "s"}], ")"}], " ", "p", 
      RowBox[{"(", 
       RowBox[{"s", "|", "w"}], ")"}], " ", "p", 
      RowBox[{"(", "w", ")"}]}]}], " ", "*)"}], "\[IndentingNewLine]", 
   RowBox[{
    RowBox[{"pw2w1a1", "[", 
     RowBox[{
     "w2_", ",", "w1_", ",", "a1_", ",", "\[Zeta]_", ",", "\[Phi]_", ",", 
      "\[Psi]_", ",", "\[Tau]_", ",", "\[Mu]_", ",", "model_"}], "]"}], ":=", 
    
    RowBox[{"Sum", "[", 
     RowBox[{
      RowBox[{
       RowBox[{
        RowBox[{"\[Alpha]", "[", "model", "]"}], "[", 
        RowBox[{"w2", ",", "w1", ",", "a1", ",", "\[Phi]", ",", "\[Psi]"}], 
        "]"}], "*", 
       RowBox[{
        RowBox[{"\[CapitalPi]", "[", "model", "]"}], "[", 
        RowBox[{"a1", ",", "s1", ",", "\[Mu]"}], "]"}], "*", 
       RowBox[{
        RowBox[{"\[Beta]", "[", "model", "]"}], "[", 
        RowBox[{"s1", ",", "w1", ",", "\[Zeta]"}], "]"}], "*", 
       RowBox[{
        RowBox[{"p", "[", "model", "]"}], "[", 
        RowBox[{"w1", ",", "\[Tau]"}], "]"}]}], ",", 
      RowBox[{"{", 
       RowBox[{"s1", ",", 
        RowBox[{"{", 
         RowBox[{
          RowBox[{"-", "1"}], ",", "1"}], "}"}]}], "}"}]}], "]"}]}], 
   "\[IndentingNewLine]", "\[IndentingNewLine]", 
   RowBox[{"(*", " ", 
    RowBox[{
     RowBox[{"p", 
      RowBox[{"(", 
       RowBox[{
        RowBox[{"w", "'"}], "|", "w"}], ")"}]}], " ", "="}], " ", "*)"}], 
   "\[IndentingNewLine]", 
   RowBox[{
    RowBox[{"pw2w1", "[", 
     RowBox[{
     "w2_", ",", "w1_", ",", "\[Zeta]_", ",", "\[Phi]_", ",", "\[Psi]_", ",", 
      "\[Tau]_", ",", "\[Mu]_", ",", "model_"}], "]"}], ":=", 
    RowBox[{"Sum", "[", 
     RowBox[{
      RowBox[{
       RowBox[{"\[Alpha]", "[", "model", "]"}], "[", 
       RowBox[{"w2", ",", "w1", ",", "a1", ",", "\[Phi]", ",", "\[Psi]"}], 
       "]"}], ",", 
      RowBox[{"{", 
       RowBox[{"a1", ",", 
        RowBox[{"{", 
         RowBox[{
          RowBox[{"-", "1"}], ",", "1"}], "}"}]}], "}"}]}], "]"}]}], 
   "\[IndentingNewLine]", "\[IndentingNewLine]", 
   RowBox[{"(*", " ", 
    RowBox[{
     RowBox[{"p", 
      RowBox[{"(", 
       RowBox[{
        RowBox[{"w", "'"}], "|", "a"}], ")"}]}], " ", "="}], " ", "*)"}], 
   "\[IndentingNewLine]", 
   RowBox[{
    RowBox[{"pw2a1", "[", 
     RowBox[{
     "w2_", ",", "a1_", ",", "\[Zeta]_", ",", "\[Phi]_", ",", "\[Psi]_", ",", 
      "\[Tau]_", ",", "\[Mu]_", ",", "model_"}], "]"}], ":=", 
    RowBox[{"Sum", "[", 
     RowBox[{
      RowBox[{
       RowBox[{"\[Alpha]", "[", "model", "]"}], "[", 
       RowBox[{"w2", ",", "w1", ",", "a1", ",", "\[Phi]", ",", "\[Psi]"}], 
       "]"}], ",", 
      RowBox[{"{", 
       RowBox[{"w1", ",", 
        RowBox[{"{", 
         RowBox[{
          RowBox[{"-", "1"}], ",", "1"}], "}"}]}], "}"}]}], "]"}]}], 
   "\[IndentingNewLine]", "\[IndentingNewLine]", 
   RowBox[{
    RowBox[{"pw2givenw1", "[", 
     RowBox[{
     "w2_", ",", "w1_", ",", "\[Zeta]_", ",", "\[Phi]_", ",", "\[Psi]_", ",", 
      "\[Tau]_", ",", "\[Mu]_", ",", "model_"}], "]"}], ":=", 
    RowBox[{"Sum", "[", 
     RowBox[{
      RowBox[{
       RowBox[{"pw2w1a1", "[", 
        RowBox[{
        "w2", ",", "w1", ",", "a1", ",", "\[Zeta]", ",", "\[Phi]", ",", 
         "\[Psi]", ",", "\[Tau]", ",", "\[Mu]", ",", "model"}], "]"}], "/", 
       RowBox[{
        RowBox[{"p", "[", "model", "]"}], "[", 
        RowBox[{"w1", ",", "\[Tau]"}], "]"}]}], ",", 
      RowBox[{"{", 
       RowBox[{"a1", ",", 
        RowBox[{"{", 
         RowBox[{
          RowBox[{"-", "1"}], ",", "1"}], "}"}]}], "}"}]}], "]"}]}], 
   "\[IndentingNewLine]", 
   RowBox[{
    RowBox[{"pw2givena1", "[", 
     RowBox[{
     "w2_", ",", "a1_", ",", "\[Zeta]_", ",", "\[Phi]_", ",", "\[Psi]_", ",", 
      "\[Tau]_", ",", "\[Mu]_", ",", "model_"}], "]"}], ":=", 
    RowBox[{"Sum", "[", 
     RowBox[{
      RowBox[{
       RowBox[{"pw2w1a1", "[", 
        RowBox[{
        "w2", ",", "w1", ",", "a1", ",", "\[Zeta]", ",", "\[Phi]", ",", 
         "\[Psi]", ",", "\[Tau]", ",", "\[Mu]", ",", "model"}], "]"}], "/", 
       RowBox[{"pa", "[", 
        RowBox[{
        "a1", ",", "\[Mu]", ",", "\[Zeta]", ",", "\[Tau]", ",", "model"}], 
        "]"}]}], ",", 
      RowBox[{"{", 
       RowBox[{"w1", ",", 
        RowBox[{"{", 
         RowBox[{
          RowBox[{"-", "1"}], ",", "1"}], "}"}]}], "}"}]}], 
     "]"}]}]}]}]], "Input",
 InitializationCell->True,
 CellChangeTimes->{{3.5417460863782673`*^9, 3.541746109550912*^9}, {
   3.5417462130802813`*^9, 3.5417462676219587`*^9}, {3.5417463003667107`*^9, 
   3.541746387626483*^9}, {3.541746422669197*^9, 3.541746539270197*^9}, {
   3.541746613733329*^9, 3.541746645512166*^9}, {3.541747342560635*^9, 
   3.541747342913823*^9}, {3.541747489836607*^9, 3.541747765681633*^9}, {
   3.541747808084181*^9, 3.5417480567953053`*^9}, {3.5417481105153503`*^9, 
   3.541748331488812*^9}, {3.5417483658643847`*^9, 3.541748371081997*^9}, {
   3.5417484135372047`*^9, 3.541748458820364*^9}, {3.541748526453602*^9, 
   3.541748542941148*^9}, {3.541748607737638*^9, 3.541748662331132*^9}, {
   3.5417487105694017`*^9, 3.54174873598812*^9}, {3.541751993258724*^9, 
   3.541752173074095*^9}, {3.5417531968698387`*^9, 3.541753271961163*^9}, {
   3.541753304314695*^9, 3.541753361282997*^9}, {3.541753430630068*^9, 
   3.541753440295332*^9}, {3.541753512646564*^9, 3.5417535231349583`*^9}, {
   3.541753565226655*^9, 3.541753585317192*^9}, {3.541753616749248*^9, 
   3.5417536216153107`*^9}, {3.5417540405083847`*^9, 3.541754067094693*^9}, {
   3.541754117451195*^9, 3.541754259688575*^9}, {3.5417543480582533`*^9, 
   3.5417543905998163`*^9}, {3.541754447195547*^9, 3.5417546545340853`*^9}, 
   3.5417548543050127`*^9, {3.5417565726784163`*^9, 3.541756636135414*^9}, {
   3.5417577806600122`*^9, 3.541757842111274*^9}, {3.5417579031332827`*^9, 
   3.54175791741544*^9}, {3.541757970422104*^9, 3.541757999467752*^9}, 
   3.541758049296706*^9, {3.5417584169456053`*^9, 3.541758432936119*^9}, {
   3.541759949271409*^9, 3.541760040478791*^9}, {3.541760504251458*^9, 
   3.541760511214904*^9}, 3.5417724967052393`*^9, {3.541772863891844*^9, 
   3.5417728835130253`*^9}, {3.541773142897854*^9, 3.541773155665332*^9}, {
   3.541773572921101*^9, 3.5417736199168663`*^9}, {3.541773727407845*^9, 
   3.541773766395073*^9}, {3.541773917501774*^9, 3.5417739495722237`*^9}, {
   3.5417741752370872`*^9, 3.541774205586501*^9}, {3.5417743479503937`*^9, 
   3.541774379832738*^9}, {3.54177461828439*^9, 3.5417746192770853`*^9}, {
   3.5417748119073677`*^9, 3.5417748718013067`*^9}, 3.541775276495182*^9, {
   3.541833010353306*^9, 3.5418330726671867`*^9}, {3.541833150050452*^9, 
   3.541833155149619*^9}, {3.5418388708567457`*^9, 3.541839072328615*^9}, {
   3.5418530450987463`*^9, 3.541853063360918*^9}, {3.541853303677259*^9, 
   3.541853322334257*^9}, {3.541853396544085*^9, 3.541853409327273*^9}, {
   3.541853452577055*^9, 3.541853454860162*^9}, {3.541853503861627*^9, 
   3.541853552330411*^9}, {3.5418559893953447`*^9, 3.541855992719801*^9}, {
   3.542608180213345*^9, 3.5426081808108892`*^9}, {3.54312605968288*^9, 
   3.543126067435339*^9}, {3.543126222078788*^9, 3.543126297539439*^9}, {
   3.5431269489140673`*^9, 3.54312701243379*^9}, {3.54312705744376*^9, 
   3.543127084651243*^9}, {3.543127147364745*^9, 3.5431275978779697`*^9}, {
   3.543127682075263*^9, 3.543127747953141*^9}, {3.5431277819039516`*^9, 
   3.543128225302184*^9}, {3.543128273035264*^9, 3.543128277700059*^9}, {
   3.5431287413547573`*^9, 3.5431287504011583`*^9}, {3.543128836060396*^9, 
   3.5431288594306803`*^9}, {3.5431289041316233`*^9, 3.543129049025363*^9}, {
   3.543656464813772*^9, 3.5436564678129473`*^9}, {3.543723409430873*^9, 
   3.543723472819065*^9}, {3.5437281372613363`*^9, 3.54372817297644*^9}, {
   3.5437282490964413`*^9, 3.543728400573613*^9}, {3.543728441158804*^9, 
   3.543728620458568*^9}, {3.5437286611523457`*^9, 3.5437288529635878`*^9}, {
   3.543729147812142*^9, 3.543729253672368*^9}, {3.543729321601095*^9, 
   3.543729404963035*^9}, {3.543736424998097*^9, 3.543736425328864*^9}, {
   3.5437366209375277`*^9, 3.543736640070032*^9}, {3.544357396316004*^9, 
   3.544357572339604*^9}, {3.544357905771831*^9, 3.544357939200889*^9}, {
   3.5443582613968267`*^9, 3.544358479779574*^9}, 3.5443585187108803`*^9, {
   3.544358555263587*^9, 3.544358683439036*^9}, {3.544358746429913*^9, 
   3.544358778614749*^9}, {3.5444409929410887`*^9, 3.544441028281289*^9}, {
   3.544524969203463*^9, 3.544525050837083*^9}, {3.544525177321868*^9, 
   3.54452530732777*^9}, {3.545048774385687*^9, 3.545048785114015*^9}, {
   3.545050067188023*^9, 3.545050087104446*^9}, {3.545050164702942*^9, 
   3.545050172781101*^9}, {3.545119686419137*^9, 3.545119876222122*^9}, {
   3.545119910392186*^9, 3.545120219914198*^9}, {3.5451217514524527`*^9, 
   3.545121755301222*^9}, {3.545121802020369*^9, 3.545121805561162*^9}, {
   3.545122203994927*^9, 3.545122207138294*^9}, {3.545122645240748*^9, 
   3.545122663312064*^9}, {3.5451228691611977`*^9, 3.545122939887497*^9}, {
   3.5451232975394907`*^9, 3.545123300489773*^9}, {3.5451235570267878`*^9, 
   3.5451235741658983`*^9}, {3.5451237411957417`*^9, 
   3.5451237578144836`*^9}, {3.545123844285985*^9, 3.545123873372499*^9}, {
   3.5451239184411497`*^9, 3.5451240235304337`*^9}, {3.5451241833883047`*^9, 
   3.545124184082946*^9}, {3.545124741305689*^9, 3.54512487430758*^9}, {
   3.5451249282941523`*^9, 3.545125276763942*^9}, {3.545125567383602*^9, 
   3.545125567682385*^9}, 3.545125793042489*^9, {3.545126195842361*^9, 
   3.545126241755259*^9}, {3.5451264238814983`*^9, 3.5451264381055098`*^9}, {
   3.5451265052442217`*^9, 3.5451265075555487`*^9}, {3.5451274213844767`*^9, 
   3.5451274286213303`*^9}, 3.5451274851505203`*^9, {3.545127613055162*^9, 
   3.5451277008595667`*^9}, {3.545127733576672*^9, 3.545127793628395*^9}, {
   3.5451279006070833`*^9, 3.545127951989277*^9}, 3.545128001416671*^9, {
   3.545128094758564*^9, 3.5451281241386747`*^9}, {3.5451281688619204`*^9, 
   3.545128170480262*^9}, {3.545128297108631*^9, 3.545128298827505*^9}, {
   3.545134788458007*^9, 3.545134792695603*^9}, {3.5451348324737577`*^9, 
   3.545134998191064*^9}, {3.54513504697386*^9, 3.54513504919202*^9}, {
   3.545135168262953*^9, 3.545135175653906*^9}, {3.5451352263575087`*^9, 
   3.5451352865191183`*^9}, {3.54513569588762*^9, 3.545135735150465*^9}, {
   3.545137708466613*^9, 3.545137798123011*^9}, {3.545634624749305*^9, 
   3.5456347042716017`*^9}, {3.54927579108047*^9, 3.54927584998617*^9}, {
   3.5492759463595877`*^9, 3.5492760197096643`*^9}, {3.549276064160179*^9, 
   3.5492760642896633`*^9}, {3.549276999994742*^9, 3.549277016052219*^9}}]
}, Open  ]],

Cell[CellGroupData[{

Cell["Measures", "Subsection",
 CellChangeTimes->{{3.565726090013154*^9, 3.565726093822144*^9}}],

Cell[CellGroupData[{

Cell["Concept 1", "Subsubsection",
 CellChangeTimes->{{3.565726435009141*^9, 3.565726438645697*^9}}],

Cell[BoxData[{
 RowBox[{
  RowBox[{
   RowBox[{
    RowBox[{"ConceptOne", "[", 
     RowBox[{
     "model_", ",", "\[Zeta]_", ",", "\[Phi]_", ",", "\[Psi]_", ",", 
      "\[Tau]_", ",", "\[Mu]_"}], "]"}], ":=", 
    RowBox[{"1", "-", 
     RowBox[{
      RowBox[{"N", "[", 
       RowBox[{"Sum", "[", 
        RowBox[{
         RowBox[{
          RowBox[{"pw2w1a1", "[", 
           RowBox[{
           "w2", ",", "w1", ",", "a1", ",", "\[Zeta]", ",", "\[Phi]", ",", 
            "\[Psi]", ",", "\[Tau]", ",", "\[Mu]", ",", "model"}], "]"}], "*", 
          RowBox[{"Log", "[", 
           FractionBox[
            RowBox[{
             RowBox[{"\[Alpha]", "[", "model", "]"}], "[", 
             RowBox[{
             "w2", ",", "w1", ",", "a1", ",", "\[Phi]", ",", "\[Psi]"}], 
             "]"}], 
            RowBox[{"pw2givenw1", "[", 
             RowBox[{
             "w2", ",", "w1", ",", "\[Zeta]", ",", "\[Phi]", ",", "\[Psi]", 
              ",", "\[Tau]", ",", "\[Mu]", ",", "model"}], "]"}]], "]"}]}], 
         ",", "\[IndentingNewLine]", 
         RowBox[{"{", 
          RowBox[{"w2", ",", 
           RowBox[{"{", 
            RowBox[{
             RowBox[{"-", "1"}], ",", "1"}], "}"}]}], "}"}], ",", 
         RowBox[{"{", 
          RowBox[{"w1", ",", 
           RowBox[{"{", 
            RowBox[{
             RowBox[{"-", "1"}], ",", "1"}], "}"}]}], "}"}], ",", 
         RowBox[{"{", 
          RowBox[{"a1", ",", 
           RowBox[{"{", 
            RowBox[{
             RowBox[{"-", "1"}], ",", "1"}], "}"}]}], "}"}]}], "]"}], "]"}], 
      "/", 
      RowBox[{"Log", "[", "2", "]"}]}]}]}], ";"}], "\[IndentingNewLine]", 
  "\[IndentingNewLine]", "\[IndentingNewLine]", 
  RowBox[{"(*", "\[IndentingNewLine]", 
   RowBox[{"Associative", " ", "Measure", " ", "A"}], "\[IndentingNewLine]", 
   "*)"}], "\[IndentingNewLine]"}], "\[IndentingNewLine]", 
 RowBox[{
  RowBox[{
   RowBox[{"BinaryASOCA", "[", 
    RowBox[{
    "model_", ",", "\[Zeta]_", ",", "\[Phi]_", ",", "\[Psi]_", ",", "\[Tau]_",
      ",", "\[Mu]_"}], "]"}], ":=", 
   RowBox[{"1", "-", 
    RowBox[{
     FractionBox["1", 
      RowBox[{"Log", "[", "2", "]"}]], 
     RowBox[{"N", "[", 
      RowBox[{"Sum", "[", 
       RowBox[{
        RowBox[{
         RowBox[{"worldModel", "[", 
          RowBox[{
          "s2", ",", "s1", ",", "a1", ",", "\[Zeta]", ",", "\[Phi]", ",", 
           "\[Psi]", ",", "\[Tau]", ",", "model"}], "]"}], "*", 
         RowBox[{
          RowBox[{"\[CapitalPi]", "[", "model", "]"}], "[", 
          RowBox[{"a1", ",", "s1", ",", "\[Mu]"}], "]"}], "*", 
         RowBox[{"sensorDistribution", "[", 
          RowBox[{"s1", ",", "\[Zeta]", ",", "\[Tau]", ",", "model"}], "]"}], 
         "*", 
         RowBox[{"Log", "[", 
          FractionBox[
           RowBox[{"worldModel", "[", 
            RowBox[{
            "s2", ",", "s1", ",", "a1", ",", "\[Zeta]", ",", "\[Phi]", ",", 
             "\[Psi]", ",", "\[Tau]", ",", "model"}], "]"}], 
           RowBox[{"psgivens", "[", 
            RowBox[{
            "s2", ",", "s1", ",", "\[Zeta]", ",", "\[Phi]", ",", "\[Psi]", 
             ",", "\[Tau]", ",", "\[Mu]", ",", "model"}], "]"}]], "]"}]}], 
        ",", "\[IndentingNewLine]", 
        RowBox[{"{", 
         RowBox[{"s2", ",", 
          RowBox[{"{", 
           RowBox[{
            RowBox[{"-", "1"}], ",", "1"}], "}"}]}], "}"}], ",", 
        RowBox[{"{", 
         RowBox[{"s1", ",", 
          RowBox[{"{", 
           RowBox[{
            RowBox[{"-", "1"}], ",", "1"}], "}"}]}], "}"}], ",", 
        RowBox[{"{", 
         RowBox[{"a1", ",", 
          RowBox[{"{", 
           RowBox[{
            RowBox[{"-", "1"}], ",", "1"}], "}"}]}], "}"}]}], "]"}], 
      "]"}]}]}]}], "\n", "\[IndentingNewLine]", "\[IndentingNewLine]", 
  RowBox[{"(*", "\[IndentingNewLine]", 
   RowBox[{"CAUSAL", " ", "MEASURE", " ", "A"}], "\[IndentingNewLine]", 
   "*)"}], "\[IndentingNewLine]"}], "\[IndentingNewLine]", 
 RowBox[{
  RowBox[{
   RowBox[{"BinaryCausalStoS", "[", 
    RowBox[{
    "model_", ",", "\[Zeta]_", ",", "\[Phi]_", ",", "\[Psi]_", ",", "\[Tau]_",
      ",", "\[Mu]_"}], "]"}], ":=", 
   RowBox[{"Sum", "[", "\[IndentingNewLine]", 
    RowBox[{
     RowBox[{
      RowBox[{"sensorDistribution", "[", 
       RowBox[{"s1", ",", "\[Zeta]", ",", "\[Tau]", ",", "model"}], "]"}], 
      "*", 
      RowBox[{"psdos", "[", 
       RowBox[{
       "s2", ",", "s1", ",", "\[Zeta]", ",", "\[Phi]", ",", "\[Psi]", ",", 
        "\[Tau]", ",", "\[Mu]", ",", "model"}], "]"}], "*", 
      RowBox[{"Log", "[", "  ", 
       FractionBox[
        RowBox[{"psdos", "[", 
         RowBox[{
         "s2", ",", "s1", ",", "\[Zeta]", ",", "\[Phi]", ",", "\[Psi]", ",", 
          "\[Tau]", ",", "\[Mu]", ",", "model"}], "]"}], 
        RowBox[{"Sum", "[", 
         RowBox[{
          RowBox[{
           RowBox[{"psdos", "[", 
            RowBox[{
            "s2", ",", "s3", ",", "\[Zeta]", ",", "\[Phi]", ",", "\[Psi]", 
             ",", "\[Tau]", ",", "\[Mu]", ",", "model"}], "]"}], "*", " ", 
           RowBox[{"sensorDistribution", "[", 
            RowBox[{"s3", ",", "\[Zeta]", ",", "\[Tau]", ",", "model"}], 
            "]"}]}], ",", 
          RowBox[{"{", 
           RowBox[{"s3", ",", 
            RowBox[{"{", 
             RowBox[{
              RowBox[{"-", "1"}], ",", "1"}], "}"}]}], "}"}]}], "]"}]], 
       "]"}]}], ",", "\[IndentingNewLine]", 
     RowBox[{"{", 
      RowBox[{"s1", ",", 
       RowBox[{"{", 
        RowBox[{
         RowBox[{"-", "1"}], ",", "1"}], "}"}]}], "}"}], ",", 
     RowBox[{"{", 
      RowBox[{"s2", ",", 
       RowBox[{"{", 
        RowBox[{
         RowBox[{"-", "1"}], ",", "1"}], "}"}]}], "}"}]}], "]"}]}], 
  ";"}], "\n", 
 RowBox[{
  RowBox[{
   RowBox[{"BinaryCausalAtoS", "[", 
    RowBox[{
    "model_", ",", "\[Zeta]_", ",", "\[Phi]_", ",", "\[Psi]_", ",", "\[Tau]_",
      ",", "\[Mu]_"}], "]"}], ":=", 
   RowBox[{"Sum", "[", "\[IndentingNewLine]", 
    RowBox[{
     RowBox[{
      RowBox[{"pa", "[", 
       RowBox[{
       "a1", ",", "\[Mu]", ",", "\[Zeta]", ",", "\[Tau]", ",", "model"}], 
       "]"}], "*", 
      RowBox[{"psdoa", "[", 
       RowBox[{
       "s2", ",", "a1", ",", "\[Zeta]", ",", "\[Phi]", ",", "\[Psi]", ",", 
        "\[Tau]", ",", "model"}], "]"}], "*", 
      RowBox[{"Log", "[", "  ", 
       FractionBox[
        RowBox[{
         RowBox[{"psdoa", "[", 
          RowBox[{
          "s2", ",", "a1", ",", "\[Zeta]", ",", "\[Phi]", ",", "\[Psi]", ",", 
           "\[Tau]", ",", "model"}], "]"}], " "}], 
        RowBox[{"Sum", "[", 
         RowBox[{
          RowBox[{
           RowBox[{"psdoa", "[", 
            RowBox[{
            "s2", ",", "a2", ",", "\[Zeta]", ",", "\[Phi]", ",", "\[Psi]", 
             ",", "\[Tau]", ",", "model"}], "]"}], "*", " ", 
           RowBox[{"pa", "[", 
            RowBox[{
            "a2", ",", "\[Mu]", ",", "\[Zeta]", ",", "\[Tau]", ",", "model"}],
             "]"}]}], ",", 
          RowBox[{"{", 
           RowBox[{"a2", ",", 
            RowBox[{"{", 
             RowBox[{
              RowBox[{"-", "1"}], ",", "1"}], "}"}]}], "}"}]}], "]"}]], 
       "]"}]}], ",", "\[IndentingNewLine]", 
     RowBox[{"{", 
      RowBox[{"a1", ",", 
       RowBox[{"{", 
        RowBox[{
         RowBox[{"-", "1"}], ",", "1"}], "}"}]}], "}"}], ",", 
     RowBox[{"{", 
      RowBox[{"s2", ",", 
       RowBox[{"{", 
        RowBox[{
         RowBox[{"-", "1"}], ",", "1"}], "}"}]}], "}"}]}], "]"}]}], 
  ";"}], "\n", 
 RowBox[{
  RowBox[{"BinaryCA", "[", 
   RowBox[{"cs_", ",", "ca_"}], "]"}], ":=", 
  RowBox[{"Module", "[", 
   RowBox[{
    RowBox[{"{", 
     RowBox[{"iter", ",", 
      RowBox[{"r", "=", 
       RowBox[{"{", "}"}]}]}], "}"}], ",", "\[IndentingNewLine]", 
    RowBox[{
     RowBox[{"For", "[", 
      RowBox[{
       RowBox[{"iter", "=", "1"}], ",", 
       RowBox[{"iter", "\[LessEqual]", 
        RowBox[{"Length", "[", "ca", "]"}]}], ",", 
       RowBox[{"iter", "++"}], ",", "\[IndentingNewLine]", 
       RowBox[{
        RowBox[{"r", "=", 
         RowBox[{"Append", "[", 
          RowBox[{"r", ",", 
           RowBox[{"{", 
            RowBox[{
             RowBox[{"ca", "[", 
              RowBox[{"[", 
               RowBox[{"iter", ",", "1"}], "]"}], "]"}], ",", 
             RowBox[{"ca", "[", 
              RowBox[{"[", 
               RowBox[{"iter", ",", "2"}], "]"}], "]"}], ",", 
             RowBox[{"ca", "[", 
              RowBox[{"[", 
               RowBox[{"iter", ",", "3"}], "]"}], "]"}], ",", 
             RowBox[{"ca", "[", 
              RowBox[{"[", 
               RowBox[{"iter", ",", "4"}], "]"}], "]"}], ",", 
             RowBox[{"ca", "[", 
              RowBox[{"[", 
               RowBox[{"iter", ",", "5"}], "]"}], "]"}], ",", 
             RowBox[{"1", "+", 
              RowBox[{
               RowBox[{"(", 
                RowBox[{
                 RowBox[{"cs", "[", 
                  RowBox[{"[", 
                   RowBox[{"iter", ",", "6"}], "]"}], "]"}], "-", 
                 RowBox[{"ca", "[", 
                  RowBox[{"[", 
                   RowBox[{"iter", ",", "6"}], "]"}], "]"}]}], ")"}], "/", 
               RowBox[{"Log", "[", "2", "]"}]}]}]}], "}"}]}], "]"}]}], 
        ";"}]}], "\[IndentingNewLine]", "]"}], ";", "\[IndentingNewLine]", 
     RowBox[{"Return", "[", "r", "]"}], ";"}]}], "\[IndentingNewLine]", 
   "]"}]}]}], "Input",
 InitializationCell->True,
 CellChangeTimes->{{3.545128695530562*^9, 3.545128712471188*^9}, {
  3.545135086087015*^9, 3.545135095762034*^9}, {3.545135129214973*^9, 
  3.545135163131344*^9}, {3.545135297697132*^9, 3.5451353213822393`*^9}, {
  3.545136399169314*^9, 3.54513643292487*^9}, {3.5451365796076927`*^9, 
  3.545136606952869*^9}, {3.56572644993845*^9, 3.565726462417396*^9}, {
  3.565729437642991*^9, 3.565729441042988*^9}, {3.5657297988768578`*^9, 
  3.565729800341114*^9}}]
}, Open  ]],

Cell[CellGroupData[{

Cell["Concept 2", "Subsubsection",
 CellChangeTimes->{{3.565726435009141*^9, 3.565726438645697*^9}, {
  3.565726505807708*^9, 3.5657265058740463`*^9}}],

Cell[BoxData[{
 RowBox[{
  RowBox[{
   RowBox[{
    RowBox[{"ConceptTwo", "[", 
     RowBox[{
     "model_", ",", "\[Zeta]_", ",", "\[Phi]_", ",", "\[Psi]_", ",", 
      "\[Tau]_", ",", "\[Mu]_"}], "]"}], ":=", 
    RowBox[{
     RowBox[{"N", "[", 
      RowBox[{"Sum", "[", 
       RowBox[{
        RowBox[{
         RowBox[{"pw2w1a1", "[", 
          RowBox[{
          "w2", ",", "w1", ",", "a1", ",", "\[Zeta]", ",", "\[Phi]", ",", 
           "\[Psi]", ",", "\[Tau]", ",", "\[Mu]", ",", "model"}], "]"}], "*", 
         
         RowBox[{"Log", "[", 
          FractionBox[
           RowBox[{
            RowBox[{"\[Alpha]", "[", "model", "]"}], "[", 
            RowBox[{
            "w2", ",", "w1", ",", "a1", ",", "\[Phi]", ",", "\[Psi]"}], "]"}], 
           RowBox[{"pw2givena1", "[", 
            RowBox[{
            "w2", ",", "a1", ",", "\[Zeta]", ",", "\[Phi]", ",", "\[Psi]", 
             ",", "\[Tau]", ",", "\[Mu]", ",", "model"}], "]"}]], "]"}]}], 
        ",", "\[IndentingNewLine]", 
        RowBox[{"{", 
         RowBox[{"w2", ",", 
          RowBox[{"{", 
           RowBox[{
            RowBox[{"-", "1"}], ",", "1"}], "}"}]}], "}"}], ",", 
        RowBox[{"{", 
         RowBox[{"w1", ",", 
          RowBox[{"{", 
           RowBox[{
            RowBox[{"-", "1"}], ",", "1"}], "}"}]}], "}"}], ",", 
        RowBox[{"{", 
         RowBox[{"a1", ",", 
          RowBox[{"{", 
           RowBox[{
            RowBox[{"-", "1"}], ",", "1"}], "}"}]}], "}"}]}], "]"}], "]"}], 
     "/", 
     RowBox[{"Log", "[", "2", "]"}]}]}], ";"}], "\[IndentingNewLine]", 
  "\[IndentingNewLine]", "\n"}], "\[IndentingNewLine]", 
 RowBox[{
  RowBox[{
   RowBox[{
    RowBox[{"BinaryASOCW", "[", 
     RowBox[{
     "model_", ",", "\[Zeta]_", ",", "\[Phi]_", ",", "\[Psi]_", ",", 
      "\[Tau]_", ",", "\[Mu]_"}], "]"}], ":=", 
    RowBox[{
     RowBox[{"N", "[", 
      RowBox[{"Sum", "[", 
       RowBox[{
        RowBox[{
         RowBox[{"worldModel", "[", 
          RowBox[{
          "s2", ",", "s1", ",", "a1", ",", "\[Zeta]", ",", "\[Phi]", ",", 
           "\[Psi]", ",", "\[Tau]", ",", "model"}], "]"}], "*", 
         RowBox[{
          RowBox[{"model", "[", 
           RowBox[{"[", "3", "]"}], "]"}], "[", 
          RowBox[{"a1", ",", "s1", ",", "\[Mu]"}], "]"}], "*", 
         RowBox[{"sensorDistribution", "[", 
          RowBox[{"s1", ",", "\[Zeta]", ",", "\[Tau]", ",", "model"}], "]"}], 
         "*", 
         RowBox[{"Log", "[", 
          FractionBox[
           RowBox[{"worldModel", "[", 
            RowBox[{
            "s2", ",", "s1", ",", "a1", ",", "\[Zeta]", ",", "\[Phi]", ",", 
             "\[Psi]", ",", "\[Tau]", ",", "model"}], "]"}], 
           RowBox[{"psprimegivena", "[", 
            RowBox[{
            "s2", ",", "a1", ",", "\[Zeta]", ",", "\[Phi]", ",", "\[Psi]", 
             ",", "\[Tau]", ",", "\[Mu]", ",", "model"}], "]"}]], "]"}]}], 
        ",", 
        RowBox[{"{", 
         RowBox[{"s2", ",", 
          RowBox[{"{", 
           RowBox[{
            RowBox[{"-", "1"}], ",", "1"}], "}"}]}], "}"}], ",", 
        RowBox[{"{", 
         RowBox[{"s1", ",", 
          RowBox[{"{", 
           RowBox[{
            RowBox[{"-", "1"}], ",", "1"}], "}"}]}], "}"}], ",", 
        RowBox[{"{", 
         RowBox[{"a1", ",", 
          RowBox[{"{", 
           RowBox[{
            RowBox[{"-", "1"}], ",", "1"}], "}"}]}], "}"}]}], "]"}], "]"}], 
     "/", 
     RowBox[{"Log", "[", "2", "]"}]}]}], ";"}], "\n", 
  "\[IndentingNewLine]"}], "\[IndentingNewLine]", 
 RowBox[{
  RowBox[{
   RowBox[{"BinaryCW", "[", 
    RowBox[{
    "model_", ",", "\[Zeta]_", ",", "\[Phi]_", ",", "\[Psi]_", ",", "\[Tau]_",
      ",", "\[Mu]_"}], "]"}], ":=", 
   RowBox[{
    RowBox[{"N", "[", 
     RowBox[{"Sum", "[", 
      RowBox[{
       RowBox[{
        RowBox[{"sensorDistribution", "[", 
         RowBox[{"s1", ",", "\[Zeta]", ",", "\[Tau]", ",", "model"}], "]"}], 
        "*", 
        RowBox[{"psgivens", "[", 
         RowBox[{
         "s2", ",", "s1", ",", "\[Zeta]", ",", "\[Phi]", ",", "\[Psi]", ",", 
          "\[Tau]", ",", "\[Mu]", ",", "model"}], "]"}], "*", 
        RowBox[{"Log", "[", 
         FractionBox[
          RowBox[{"psgivens", "[", 
           RowBox[{
           "s2", ",", "s1", ",", "\[Zeta]", ",", "\[Phi]", ",", "\[Psi]", ",",
             "\[Tau]", ",", "\[Mu]", ",", "model"}], "]"}], 
          RowBox[{"psgivensHAT", "[", 
           RowBox[{
           "s2", ",", "s1", ",", "\[Zeta]", ",", "\[Phi]", ",", "\[Psi]", ",",
             "\[Tau]", ",", "\[Mu]", ",", "model"}], "]"}]], "]"}]}], ",", 
       RowBox[{"{", 
        RowBox[{"s2", ",", 
         RowBox[{"{", 
          RowBox[{
           RowBox[{"-", "1"}], ",", "1"}], "}"}]}], "}"}], ",", 
       RowBox[{"{", 
        RowBox[{"s1", ",", 
         RowBox[{"{", 
          RowBox[{
           RowBox[{"-", "1"}], ",", "1"}], "}"}]}], "}"}]}], "]"}], "]"}], 
    "/", 
    RowBox[{"Log", "[", "2", "]"}]}]}], ";"}]}], "Input",
 InitializationCell->True,
 CellChangeTimes->{{3.545128695530562*^9, 3.545128712471188*^9}, {
  3.545135086087015*^9, 3.545135095762034*^9}, {3.545135129214973*^9, 
  3.545135163131344*^9}, {3.545135297697132*^9, 3.5451353213822393`*^9}, {
  3.545135629966189*^9, 3.545135630857251*^9}, {3.545135663947482*^9, 
  3.5451356685772667`*^9}, {3.545137450028034*^9, 3.545137469490797*^9}, {
  3.565726416615429*^9, 3.5657264213240633`*^9}, {3.565726537527166*^9, 
  3.565726570924553*^9}}]
}, Open  ]]
}, Open  ]],

Cell[CellGroupData[{

Cell["Get Data", "Subsection",
 CellChangeTimes->{{3.541854257064995*^9, 3.5418542630659857`*^9}}],

Cell[BoxData[
 RowBox[{
  RowBox[{"Calculate", "[", 
   RowBox[{"model_", ",", "func_", ",", 
    RowBox[{"\[Zeta]Param_", " ", ":", 
     RowBox[{"{", 
      RowBox[{"0", ",", "3", ",", "10"}], "}"}]}], ",", 
    RowBox[{"\[Phi]Param_", " ", ":", 
     RowBox[{"{", 
      RowBox[{"0", ",", "3", ",", "10"}], "}"}]}], ",", 
    RowBox[{"\[Psi]Param_", " ", ":", 
     RowBox[{"{", 
      RowBox[{"0", ",", "3", ",", "10"}], "}"}]}], ",", 
    RowBox[{"\[Tau]Param_", " ", ":", 
     RowBox[{"{", 
      RowBox[{"0", ",", "3", ",", "10"}], "}"}]}], ",", 
    RowBox[{"\[Mu]Param_", " ", ":", 
     RowBox[{"{", 
      RowBox[{"0", ",", "3", ",", "10"}], "}"}]}]}], "]"}], ":=", 
  RowBox[{"Module", "[", "\[IndentingNewLine]", 
   RowBox[{
    RowBox[{"{", 
     RowBox[{
     "\[Zeta]", ",", "\[Phi]", ",", "\[Psi]", ",", "\[Tau]", ",", "\[Mu]", 
      ",", "results", ",", "count", ",", "r", ",", "index", ",", "x", ",", 
      "\[Zeta]Min", ",", "\[Zeta]Max", ",", "\[Zeta]Steps", ",", " ", 
      "\[Phi]Min", ",", "\[Phi]Max", ",", "\[Phi]Steps", ",", " ", 
      "\[Psi]Min", ",", "\[Psi]Max", ",", "\[Psi]Steps", ",", " ", 
      "\[Tau]Min", ",", "\[Tau]Max", ",", "\[Tau]Steps", ",", " ", "\[Mu]Min",
       ",", "\[Mu]Max", ",", "\[Mu]Steps", ",", "\[Zeta]Vector", ",", 
      "\[Phi]Vector", ",", "\[Psi]Vector", ",", "\[Tau]Vector", ",", 
      "\[Mu]Vector"}], "}"}], ",", "\[IndentingNewLine]", 
    "\[IndentingNewLine]", 
    RowBox[{
     RowBox[{"\[Zeta]Min", "=", 
      RowBox[{"\[Zeta]Param", "[", 
       RowBox[{"[", "1", "]"}], "]"}]}], ";", 
     RowBox[{"\[Zeta]Max", "=", 
      RowBox[{"\[Zeta]Param", "[", 
       RowBox[{"[", "2", "]"}], "]"}]}], ";", 
     RowBox[{"\[Zeta]Steps", "=", 
      RowBox[{"\[Zeta]Param", "[", 
       RowBox[{"[", "3", "]"}], "]"}]}], ";", 
     RowBox[{"\[Zeta]Vector", "=", 
      RowBox[{"{", "}"}]}], ";", "\[IndentingNewLine]", 
     RowBox[{"If", "[", 
      RowBox[{
       RowBox[{"\[Zeta]Steps", "\[Equal]", "1"}], ",", 
       RowBox[{"\[Zeta]Vector", "=", 
        RowBox[{"{", "\[Zeta]Min", "}"}]}], ",", 
       RowBox[{"For", "[", 
        RowBox[{
         RowBox[{"\[Zeta]", "=", "\[Zeta]Min"}], ",", 
         RowBox[{"\[Zeta]", "\[LessEqual]", "\[Zeta]Max"}], ",", 
         RowBox[{"\[Zeta]", "=", 
          RowBox[{"\[Zeta]", "+", 
           RowBox[{
            RowBox[{"(", 
             RowBox[{"\[Zeta]Max", "-", "\[Zeta]Min"}], ")"}], "/", 
            RowBox[{"(", 
             RowBox[{"\[Zeta]Steps", "-", "1"}], ")"}]}]}]}], ",", 
         RowBox[{"\[Zeta]Vector", "=", 
          RowBox[{"Append", "[", 
           RowBox[{"\[Zeta]Vector", ",", "\[Zeta]"}], "]"}]}]}], "]"}]}], 
      "]"}], ";", "\[IndentingNewLine]", "\[IndentingNewLine]", 
     RowBox[{"\[Phi]Min", "=", 
      RowBox[{"\[Phi]Param", "[", 
       RowBox[{"[", "1", "]"}], "]"}]}], ";", 
     RowBox[{"\[Phi]Max", "=", 
      RowBox[{"\[Phi]Param", "[", 
       RowBox[{"[", "2", "]"}], "]"}]}], ";", 
     RowBox[{"\[Phi]Steps", "=", 
      RowBox[{"\[Phi]Param", "[", 
       RowBox[{"[", "3", "]"}], "]"}]}], ";", 
     RowBox[{"\[Phi]Vector", "=", 
      RowBox[{"{", "}"}]}], ";", "\[IndentingNewLine]", 
     RowBox[{"If", "[", 
      RowBox[{
       RowBox[{"\[Phi]Steps", "\[Equal]", "1"}], ",", 
       RowBox[{"\[Phi]Vector", "=", 
        RowBox[{"{", "\[Phi]Min", "}"}]}], ",", 
       RowBox[{"For", "[", 
        RowBox[{
         RowBox[{"\[Phi]", "=", "\[Phi]Min"}], ",", 
         RowBox[{"\[Phi]", "\[LessEqual]", "\[Phi]Max"}], ",", 
         RowBox[{"\[Phi]", "=", 
          RowBox[{"\[Phi]", "+", 
           RowBox[{
            RowBox[{"(", 
             RowBox[{"\[Phi]Max", "-", "\[Phi]Min"}], ")"}], "/", 
            RowBox[{"(", 
             RowBox[{"\[Phi]Steps", "-", "1"}], ")"}]}]}]}], ",", 
         RowBox[{"\[Phi]Vector", "=", 
          RowBox[{"Append", "[", 
           RowBox[{"\[Phi]Vector", ",", "\[Phi]"}], "]"}]}]}], "]"}]}], "]"}],
      ";", "\[IndentingNewLine]", "\[IndentingNewLine]", 
     RowBox[{"\[Psi]Min", "=", 
      RowBox[{"\[Psi]Param", "[", 
       RowBox[{"[", "1", "]"}], "]"}]}], ";", 
     RowBox[{"\[Psi]Max", "=", 
      RowBox[{"\[Psi]Param", "[", 
       RowBox[{"[", "2", "]"}], "]"}]}], ";", 
     RowBox[{"\[Psi]Steps", "=", 
      RowBox[{"\[Psi]Param", "[", 
       RowBox[{"[", "3", "]"}], "]"}]}], ";", 
     RowBox[{"\[Psi]Vector", "=", 
      RowBox[{"{", "}"}]}], ";", "\[IndentingNewLine]", 
     RowBox[{"If", "[", 
      RowBox[{
       RowBox[{"\[Psi]Steps", "\[Equal]", "1"}], ",", 
       RowBox[{"\[Psi]Vector", "=", 
        RowBox[{"{", "\[Psi]Min", "}"}]}], ",", 
       RowBox[{"For", "[", 
        RowBox[{
         RowBox[{"\[Psi]", "=", "\[Psi]Min"}], ",", 
         RowBox[{"\[Psi]", "\[LessEqual]", "\[Psi]Max"}], ",", 
         RowBox[{"\[Psi]", "=", 
          RowBox[{"\[Psi]", "+", 
           RowBox[{
            RowBox[{"(", 
             RowBox[{"\[Psi]Max", "-", "\[Psi]Min"}], ")"}], "/", 
            RowBox[{"(", 
             RowBox[{"\[Psi]Steps", "-", "1"}], ")"}]}]}]}], ",", 
         RowBox[{"\[Psi]Vector", "=", 
          RowBox[{"Append", "[", 
           RowBox[{"\[Psi]Vector", ",", "\[Psi]"}], "]"}]}]}], "]"}]}], "]"}],
      ";", "\[IndentingNewLine]", "\[IndentingNewLine]", 
     RowBox[{"\[Tau]Min", "=", 
      RowBox[{"\[Tau]Param", "[", 
       RowBox[{"[", "1", "]"}], "]"}]}], ";", 
     RowBox[{"\[Tau]Max", "=", 
      RowBox[{"\[Tau]Param", "[", 
       RowBox[{"[", "2", "]"}], "]"}]}], ";", 
     RowBox[{"\[Tau]Steps", "=", 
      RowBox[{"\[Tau]Param", "[", 
       RowBox[{"[", "3", "]"}], "]"}]}], ";", 
     RowBox[{"\[Tau]Vector", "=", 
      RowBox[{"{", "}"}]}], ";", "\[IndentingNewLine]", 
     RowBox[{"If", "[", 
      RowBox[{
       RowBox[{"\[Tau]Steps", "\[Equal]", "1"}], ",", 
       RowBox[{"\[Tau]Vector", "=", 
        RowBox[{"{", "\[Tau]Min", "}"}]}], ",", 
       RowBox[{"For", "[", 
        RowBox[{
         RowBox[{"\[Tau]", "=", "\[Tau]Min"}], ",", 
         RowBox[{"\[Tau]", "\[LessEqual]", "\[Tau]Max"}], ",", 
         RowBox[{"\[Tau]", "=", 
          RowBox[{"\[Tau]", "+", 
           RowBox[{
            RowBox[{"(", 
             RowBox[{"\[Tau]Max", "-", "\[Tau]Min"}], ")"}], "/", 
            RowBox[{"(", 
             RowBox[{"\[Tau]Steps", "-", "1"}], ")"}]}]}]}], ",", 
         RowBox[{"\[Tau]Vector", "=", 
          RowBox[{"Append", "[", 
           RowBox[{"\[Tau]Vector", ",", "\[Tau]"}], "]"}]}]}], "]"}]}], "]"}],
      ";", "\[IndentingNewLine]", "\[IndentingNewLine]", 
     RowBox[{"\[Mu]Min", "=", 
      RowBox[{"\[Mu]Param", "[", 
       RowBox[{"[", "1", "]"}], "]"}]}], ";", 
     RowBox[{"\[Mu]Max", "=", 
      RowBox[{"\[Mu]Param", "[", 
       RowBox[{"[", "2", "]"}], "]"}]}], ";", 
     RowBox[{"\[Mu]Steps", "=", 
      RowBox[{"\[Mu]Param", "[", 
       RowBox[{"[", "3", "]"}], "]"}]}], ";", 
     RowBox[{"\[Mu]Vector", "=", 
      RowBox[{"{", "}"}]}], ";", "\[IndentingNewLine]", 
     RowBox[{"If", "[", 
      RowBox[{
       RowBox[{"\[Mu]Steps", "\[Equal]", "1"}], ",", 
       RowBox[{"\[Mu]Vector", "=", 
        RowBox[{"{", "\[Mu]Min", "}"}]}], ",", 
       RowBox[{"For", "[", 
        RowBox[{
         RowBox[{"\[Mu]", "=", "\[Mu]Min"}], ",", 
         RowBox[{"\[Mu]", "\[LessEqual]", "\[Mu]Max"}], ",", 
         RowBox[{"\[Mu]", "=", 
          RowBox[{"\[Mu]", "+", 
           RowBox[{
            RowBox[{"(", 
             RowBox[{"\[Mu]Max", "-", "\[Mu]Min"}], ")"}], "/", 
            RowBox[{"(", 
             RowBox[{"\[Mu]Steps", "-", "1"}], ")"}]}]}]}], ",", 
         RowBox[{"\[Mu]Vector", "=", 
          RowBox[{"Append", "[", 
           RowBox[{"\[Mu]Vector", ",", "\[Mu]"}], "]"}]}]}], "]"}]}], "]"}], 
     ";", "\[IndentingNewLine]", "\[IndentingNewLine]", 
     RowBox[{"results", "=", 
      RowBox[{"{", "}"}]}], ";", "\[IndentingNewLine]", 
     RowBox[{"count", "=", 
      RowBox[{
      "\[Zeta]Steps", " ", "\[Phi]Steps", " ", "\[Psi]Steps", " ", 
       "\[Tau]Steps", " ", "\[Mu]Steps"}]}], ";", "\[IndentingNewLine]", 
     RowBox[{"index", "=", "0"}], ";", "\[IndentingNewLine]", 
     RowBox[{"x", "=", "0"}], ";", "\[IndentingNewLine]", 
     RowBox[{"Print", "[", 
      RowBox[{
       RowBox[{"ProgressIndicator", "[", 
        RowBox[{"Dynamic", "[", "x", "]"}], "]"}], ",", "\"\<  \>\"", ",", 
       RowBox[{"Dynamic", "[", "index", "]"}], ",", "\"\</\>\"", ",", 
       "count"}], "]"}], ";", "\[IndentingNewLine]", "\[IndentingNewLine]", 
     RowBox[{"For", "[", 
      RowBox[{
       RowBox[{"\[Zeta]", "=", "1"}], ",", 
       RowBox[{"\[Zeta]", "\[LessEqual]", 
        RowBox[{"Length", "[", "\[Zeta]Vector", "]"}]}], ",", 
       RowBox[{"\[Zeta]", "++"}], ",", "\[IndentingNewLine]", 
       RowBox[{"For", "[", 
        RowBox[{
         RowBox[{"\[Phi]", "=", "1"}], ",", 
         RowBox[{"\[Phi]", "\[LessEqual]", 
          RowBox[{"Length", "[", "\[Phi]Vector", "]"}]}], ",", 
         RowBox[{"\[Phi]", "++"}], ",", "\[IndentingNewLine]", 
         RowBox[{"For", "[", 
          RowBox[{
           RowBox[{"\[Psi]", "=", "1"}], ",", 
           RowBox[{"\[Psi]", "\[LessEqual]", 
            RowBox[{"Length", "[", "\[Psi]Vector", "]"}]}], ",", 
           RowBox[{"\[Psi]", "++"}], ",", "\[IndentingNewLine]", 
           RowBox[{"For", "[", 
            RowBox[{
             RowBox[{"\[Tau]", "=", "1"}], ",", 
             RowBox[{"\[Tau]", "\[LessEqual]", 
              RowBox[{"Length", "[", "\[Tau]Vector", "]"}]}], ",", 
             RowBox[{"\[Tau]", "++"}], ",", "\[IndentingNewLine]", 
             RowBox[{"For", "[", 
              RowBox[{
               RowBox[{"\[Mu]", "=", "1"}], ",", 
               RowBox[{"\[Mu]", "\[LessEqual]", 
                RowBox[{"Length", "[", "\[Mu]Vector", "]"}]}], ",", 
               RowBox[{"\[Mu]", "++"}], ",", "\[IndentingNewLine]", 
               RowBox[{"(*", 
                RowBox[{
                 RowBox[{"Print", "[", 
                  RowBox[{
                  "\[Zeta]", ",", "\"\< \>\"", ",", "\[Phi]", ",", 
                   "\"\< \>\"", ",", "\[Psi]", ",", "\"\< \>\"", ",", 
                   "\[Tau]", ",", "\"\< \>\"", ",", "\[Mu]"}], "]"}], ";"}], 
                " ", "*)"}], "\[IndentingNewLine]", 
               RowBox[{
                RowBox[{"index", "=", 
                 RowBox[{"index", "+", "1"}]}], ";", "\[IndentingNewLine]", 
                RowBox[{"r", "=", 
                 RowBox[{"func", "[", 
                  RowBox[{"model", ",", 
                   RowBox[{"\[Zeta]Vector", "[", 
                    RowBox[{"[", "\[Zeta]", "]"}], "]"}], ",", 
                   RowBox[{"\[Phi]Vector", "[", 
                    RowBox[{"[", "\[Phi]", "]"}], "]"}], ",", 
                   RowBox[{"\[Psi]Vector", "[", 
                    RowBox[{"[", "\[Psi]", "]"}], "]"}], ",", 
                   RowBox[{"\[Tau]Vector", "[", 
                    RowBox[{"[", "\[Tau]", "]"}], "]"}], ",", 
                   RowBox[{"\[Mu]Vector", "[", 
                    RowBox[{"[", "\[Mu]", "]"}], "]"}]}], "]"}]}], ";", 
                "\[IndentingNewLine]", 
                RowBox[{"results", "=", 
                 RowBox[{"Append", "[", 
                  RowBox[{"results", ",", 
                   RowBox[{"{", 
                    RowBox[{
                    RowBox[{"\[Zeta]Vector", "[", 
                    RowBox[{"[", "\[Zeta]", "]"}], "]"}], ",", 
                    RowBox[{"\[Phi]Vector", "[", 
                    RowBox[{"[", "\[Phi]", "]"}], "]"}], ",", 
                    RowBox[{"\[Psi]Vector", "[", 
                    RowBox[{"[", "\[Psi]", "]"}], "]"}], ",", 
                    RowBox[{"\[Tau]Vector", "[", 
                    RowBox[{"[", "\[Tau]", "]"}], "]"}], ",", 
                    RowBox[{"\[Mu]Vector", "[", 
                    RowBox[{"[", "\[Mu]", "]"}], "]"}], ",", "r"}], "}"}]}], 
                  "]"}]}], ";", "\[IndentingNewLine]", 
                RowBox[{"x", "=", 
                 RowBox[{"index", "/", "count"}]}], ";"}]}], 
              "\[IndentingNewLine]", "]"}]}], "\[IndentingNewLine]", "]"}]}], 
          "\[IndentingNewLine]", "]"}]}], "\[IndentingNewLine]", "]"}]}], 
      "\[IndentingNewLine]", "]"}], ";", "\[IndentingNewLine]", 
     RowBox[{"index", "=", "count"}], ";", "\[IndentingNewLine]", 
     RowBox[{"x", "=", "1"}], ";", "\[IndentingNewLine]", 
     RowBox[{"Return", "[", "results", "]"}], ";"}]}], "\[IndentingNewLine]", 
   "]"}]}]], "Input",
 InitializationCell->True,
 CellChangeTimes->{{3.541854266155939*^9, 3.5418542763111773`*^9}, {
   3.5418546378647633`*^9, 3.5418546444439373`*^9}, {3.543656141682642*^9, 
   3.543656141837861*^9}, {3.54365634797963*^9, 3.5436563649915867`*^9}, {
   3.543670235508338*^9, 3.54367023682833*^9}, {3.543728059688308*^9, 
   3.543728064857588*^9}, {3.544357039975719*^9, 3.544357049556814*^9}, {
   3.5443580328464117`*^9, 3.544358037179537*^9}, {3.5443581002698183`*^9, 
   3.544358108531042*^9}, {3.544358925582182*^9, 3.544358930368492*^9}, 
   3.544359122221023*^9, {3.544525369211856*^9, 3.54452537591576*^9}, {
   3.545135343197381*^9, 3.545135353212719*^9}, {3.5451355653711443`*^9, 
   3.545135566994953*^9}, {3.545135598118504*^9, 3.545135601200951*^9}, {
   3.5451356330058327`*^9, 3.5451356401877747`*^9}, {3.545136220082882*^9, 
   3.545136265970812*^9}, {3.568371749671043*^9, 3.568371753996746*^9}}]
}, Open  ]],

Cell[CellGroupData[{

Cell["Visualisation", "Subsection",
 CellChangeTimes->{{3.541775354038845*^9, 3.541775357602914*^9}}],

Cell[BoxData[
 RowBox[{
  RowBox[{
   RowBox[{"PlotResults", "[", 
    RowBox[{"results_", ",", "label_", ",", 
     RowBox[{"indices_", " ", ":", " ", 
      RowBox[{"{", 
       RowBox[{"2", ",", "3", ",", "5"}], "}"}]}]}], "]"}], ":=", 
   RowBox[{"Module", "[", 
    RowBox[{
     RowBox[{"{", 
      RowBox[{
      "X", ",", "Y", ",", "Z", ",", "C1", ",", "C2", ",", "C", ",", "plot", 
       ",", "plots", ",", "data", ",", "z", ",", "d", ",", "iter"}], "}"}], 
     ",", "\[IndentingNewLine]", 
     RowBox[{
      RowBox[{"X", "=", 
       RowBox[{"results", "[", 
        RowBox[{"[", 
         RowBox[{"All", ",", 
          RowBox[{"indices", "[", 
           RowBox[{"[", "1", "]"}], "]"}]}], "]"}], "]"}]}], ";", 
      "\[IndentingNewLine]", 
      RowBox[{"Y", "=", 
       RowBox[{"results", "[", 
        RowBox[{"[", 
         RowBox[{"All", ",", 
          RowBox[{"indices", "[", 
           RowBox[{"[", "2", "]"}], "]"}]}], "]"}], "]"}]}], ";", 
      "\[IndentingNewLine]", 
      RowBox[{"Z", "=", 
       RowBox[{"results", "[", 
        RowBox[{"[", 
         RowBox[{"All", ",", 
          RowBox[{"indices", "[", 
           RowBox[{"[", "3", "]"}], "]"}]}], "]"}], "]"}]}], ";", 
      "\[IndentingNewLine]", 
      RowBox[{"C", "=", 
       RowBox[{"results", "[", 
        RowBox[{"[", 
         RowBox[{"All", ",", 
          RowBox[{"Length", "[", 
           RowBox[{"results", "[", 
            RowBox[{"[", "1", "]"}], "]"}], "]"}]}], "]"}], "]"}]}], ";", 
      "\[IndentingNewLine]", 
      RowBox[{"data", "=", 
       RowBox[{"{", "}"}]}], ";", "\[IndentingNewLine]", 
      RowBox[{"For", "[", 
       RowBox[{
        RowBox[{"iter", "=", "1"}], ",", 
        RowBox[{"iter", "\[LessEqual]", 
         RowBox[{"Length", "[", "C", "]"}]}], ",", 
        RowBox[{"iter", "++"}], ",", "\[IndentingNewLine]", 
        RowBox[{
         RowBox[{"data", "=", 
          RowBox[{"Append", "[", 
           RowBox[{"data", ",", 
            RowBox[{"{", 
             RowBox[{
              RowBox[{"X", "[", 
               RowBox[{"[", "iter", "]"}], "]"}], ",", 
              RowBox[{"Y", "[", 
               RowBox[{"[", "iter", "]"}], "]"}], ",", 
              RowBox[{"Z", "[", 
               RowBox[{"[", "iter", "]"}], "]"}], ",", 
              RowBox[{"C", "[", 
               RowBox[{"[", "iter", "]"}], "]"}]}], "}"}]}], "]"}]}], ";"}]}],
        "\[IndentingNewLine]", "]"}], ";", "\[IndentingNewLine]", 
      RowBox[{"Z", "=", 
       RowBox[{"DeleteDuplicates", "[", "Z", "]"}]}], ";", 
      "\[IndentingNewLine]", 
      RowBox[{"plots", "=", 
       RowBox[{"{", "}"}]}], ";", "\[IndentingNewLine]", 
      RowBox[{"(*", " ", 
       RowBox[{
        RowBox[{"AxesOrigin", "\[Rule]", 
         RowBox[{"{", 
          RowBox[{"0", ",", "5", ",", "2"}], "}"}]}], ","}], " ", "*)"}], 
      "\[IndentingNewLine]", 
      RowBox[{"(*", " ", 
       RowBox[{
        RowBox[{"PlotRange", "\[Rule]", 
         RowBox[{"{", 
          RowBox[{
           RowBox[{"{", 
            RowBox[{"0", ",", "5"}], "}"}], ",", 
           RowBox[{"{", 
            RowBox[{"0", ",", "5"}], "}"}], ",", 
           RowBox[{"{", 
            RowBox[{"0", ",", "2"}], "}"}]}], "}"}]}], ","}], " ", "*)"}], 
      "\[IndentingNewLine]", 
      RowBox[{"(*", " ", 
       RowBox[{
        RowBox[{"PlotRange", "\[Rule]", 
         RowBox[{"{", 
          RowBox[{
           RowBox[{"{", 
            RowBox[{"0", ",", "5"}], "}"}], ",", 
           RowBox[{"{", 
            RowBox[{"0", ",", "5"}], "}"}], ",", 
           RowBox[{"{", 
            RowBox[{"0", ",", "2"}], "}"}]}], "}"}]}], ","}], " ", "*)"}], 
      "\[IndentingNewLine]", 
      RowBox[{"For", "[", 
       RowBox[{
        RowBox[{"iter", "=", "1"}], ",", 
        RowBox[{"iter", "\[LessEqual]", 
         RowBox[{"Length", "[", "Z", "]"}]}], ",", 
        RowBox[{"iter", "++"}], ",", "\[IndentingNewLine]", 
        RowBox[{
         RowBox[{"plot", "=", 
          RowBox[{"ListPlot3D", "[", 
           RowBox[{
            RowBox[{
             RowBox[{"Select", "[", 
              RowBox[{"data", ",", 
               RowBox[{
                RowBox[{
                 RowBox[{"#", "[", 
                  RowBox[{"[", "3", "]"}], "]"}], "\[Equal]", 
                 RowBox[{"Z", "[", 
                  RowBox[{"[", "iter", "]"}], "]"}]}], "&"}]}], "]"}], "[", 
             RowBox[{"[", 
              RowBox[{"All", ",", 
               RowBox[{"{", 
                RowBox[{"1", ",", "2", ",", "4"}], "}"}]}], "]"}], "]"}], ",", 
            RowBox[{"PlotLabel", "\[Rule]", 
             RowBox[{"Style", "[", 
              RowBox[{
               RowBox[{"\"\<\[Mu] = \>\"", " ", "<>", " ", 
                RowBox[{"ToString", "[", 
                 RowBox[{"N", "[", 
                  RowBox[{
                   RowBox[{"Z", "[", 
                    RowBox[{"[", "iter", "]"}], "]"}], ",", "2"}], "]"}], 
                 "]"}]}], ",", "24"}], "]"}]}], ",", "\[IndentingNewLine]", 
            RowBox[{"Axes", "\[Rule]", 
             RowBox[{"{", 
              RowBox[{"True", ",", "True", ",", "True"}], "}"}]}], ",", 
            RowBox[{"TicksStyle", "\[Rule]", 
             RowBox[{"Directive", "[", "14", "]"}]}], ",", 
            RowBox[{"AxesLabel", "\[Rule]", 
             RowBox[{"{", 
              RowBox[{
               RowBox[{"Style", "[", 
                RowBox[{"\"\<\[Phi]\>\"", ",", "24"}], "]"}], ",", 
               RowBox[{"Style", "[", 
                RowBox[{"\"\<\[Psi]\>\"", ",", "24"}], "]"}], ",", 
               RowBox[{"Style", "[", 
                RowBox[{"label", ",", "24"}], "]"}]}], "}"}]}], ",", 
            "\[IndentingNewLine]", 
            RowBox[{"AxesEdge", "\[Rule]", 
             RowBox[{"{", 
              RowBox[{
               RowBox[{"{", 
                RowBox[{"1", ",", 
                 RowBox[{"-", "1"}]}], "}"}], ",", 
               RowBox[{"{", 
                RowBox[{
                 RowBox[{"-", "1"}], ",", "1"}], "}"}], ",", 
               RowBox[{"{", 
                RowBox[{
                 RowBox[{"-", "1"}], ",", "1"}], "}"}]}], "}"}]}], ",", 
            "\[IndentingNewLine]", 
            RowBox[{"PlotRange", "\[Rule]", 
             RowBox[{"{", 
              RowBox[{
               RowBox[{"{", 
                RowBox[{"0", ",", "5"}], "}"}], ",", 
               RowBox[{"{", 
                RowBox[{"0", ",", "5"}], "}"}], ",", 
               RowBox[{"{", 
                RowBox[{"0", ",", "1"}], "}"}]}], "}"}]}], ",", 
            "\[IndentingNewLine]", 
            RowBox[{"ImageSize", "\[Rule]", "300"}], ",", 
            "\[IndentingNewLine]", 
            RowBox[{"AspectRatio", "\[Rule]", 
             RowBox[{"1", "/", "2.5"}]}], ",", "\[IndentingNewLine]", 
            RowBox[{"ViewPoint", "\[Rule]", 
             RowBox[{"{", 
              RowBox[{"0", ",", "1", ",", "0.5"}], "}"}]}]}], "]"}]}], ";", 
         "\[IndentingNewLine]", 
         RowBox[{"plots", "=", 
          RowBox[{"Append", "[", 
           RowBox[{"plots", ",", 
            RowBox[{"ImageCrop", "[", "plot", "]"}]}], "]"}]}], ";"}]}], 
       "\[IndentingNewLine]", "]"}], ";", "\[IndentingNewLine]", 
      RowBox[{"Return", "[", 
       RowBox[{"ListAnimate", "[", 
        RowBox[{"plots", ",", 
         RowBox[{"AnimationRunning", "\[Rule]", "False"}], ",", 
         RowBox[{"AnimationRepetitions", "\[Rule]", "1"}]}], "]"}], "]"}], 
      ";"}]}], "\[IndentingNewLine]", "]"}]}], ";"}]], "Input",
 InitializationCell->True,
 CellChangeTimes->{{3.541775406896103*^9, 3.541775416966125*^9}, {
   3.541775665413926*^9, 3.5417758464571533`*^9}, {3.5417759029619093`*^9, 
   3.541775922104814*^9}, {3.541776114174081*^9, 3.541776139773419*^9}, {
   3.5417762364277267`*^9, 3.5417762605242033`*^9}, {3.541776394043476*^9, 
   3.541776405761671*^9}, {3.541776523657526*^9, 3.541776539014748*^9}, {
   3.541776592385789*^9, 3.541776616506484*^9}, 3.541776671399947*^9, {
   3.541776762667027*^9, 3.541776799240353*^9}, {3.54177683249185*^9, 
   3.541776865036034*^9}, {3.541776991727358*^9, 3.541777004480525*^9}, {
   3.5417770349489307`*^9, 3.5417770490445023`*^9}, 3.5417770968146763`*^9, {
   3.541777144958251*^9, 3.541777152315933*^9}, {3.5417772020688553`*^9, 
   3.5417772042775373`*^9}, {3.541777237558558*^9, 3.541777242624406*^9}, {
   3.541777437872548*^9, 3.541777440246851*^9}, {3.541777501471698*^9, 
   3.541777508042358*^9}, {3.5417775385936813`*^9, 3.541777576273477*^9}, {
   3.541777612759152*^9, 3.541777637369691*^9}, 3.5418241220173073`*^9, {
   3.5418276958390493`*^9, 3.541827717805414*^9}, {3.5418277549584627`*^9, 
   3.5418278167276707`*^9}, {3.5418279853414383`*^9, 3.541828062545271*^9}, {
   3.541828149768664*^9, 3.54182816275062*^9}, {3.541828586364698*^9, 
   3.541828610253962*^9}, {3.541829112723012*^9, 3.541829158772566*^9}, {
   3.541829239514064*^9, 3.541829394691053*^9}, {3.541829699829113*^9, 
   3.5418297208074293`*^9}, {3.541829831806446*^9, 3.541829834638468*^9}, {
   3.541829887841361*^9, 3.541829941743318*^9}, {3.541830138503504*^9, 
   3.5418301880172873`*^9}, {3.541831104264141*^9, 3.5418311130639133`*^9}, {
   3.541831333630611*^9, 3.541831337174899*^9}, {3.541831424978752*^9, 
   3.541831425102236*^9}, {3.541831757606142*^9, 3.541831760018819*^9}, {
   3.5418318825920963`*^9, 3.541831887062101*^9}, {3.541831958172249*^9, 
   3.5418319952115*^9}, {3.541832063399625*^9, 3.541832071937016*^9}, {
   3.5418321945929413`*^9, 3.5418322083871727`*^9}, {3.5418322474462023`*^9, 
   3.5418322806341467`*^9}, 3.541832395333869*^9, {3.541833434571773*^9, 
   3.541833482057486*^9}, {3.541835395905205*^9, 3.541835475087151*^9}, {
   3.541835571187334*^9, 3.5418355826938143`*^9}, {3.541835664655406*^9, 
   3.541835664840022*^9}, {3.541836248912717*^9, 3.5418364147608137`*^9}, {
   3.5418364978721867`*^9, 3.541836521543808*^9}, {3.541836604605297*^9, 
   3.541836638641917*^9}, {3.541836751746146*^9, 3.5418367698805437`*^9}, {
   3.541836809021661*^9, 3.5418368377843513`*^9}, {3.541852853329813*^9, 
   3.541852854557419*^9}, {3.541854304307015*^9, 3.5418543634719267`*^9}, {
   3.5418544805420933`*^9, 3.541854593402998*^9}, {3.541854668367023*^9, 
   3.541854707743856*^9}, 3.541854947352573*^9, 3.541855029503805*^9, {
   3.541855281241218*^9, 3.541855287735283*^9}, {3.54185572364393*^9, 
   3.5418557313649197`*^9}, {3.54190646974545*^9, 3.541906472670718*^9}, {
   3.542539487327738*^9, 3.5425395180038424`*^9}, {3.542539636263364*^9, 
   3.5425396545109673`*^9}, {3.542540026865135*^9, 3.5425400766484623`*^9}, {
   3.543656536738881*^9, 3.5436565371722918`*^9}, 3.5436702423345003`*^9, {
   3.54367034477864*^9, 3.543670347984272*^9}, {3.5436703919250517`*^9, 
   3.543670398213966*^9}, {3.543670472898098*^9, 3.543670536492243*^9}, {
   3.543670645208927*^9, 3.543670647524723*^9}, {3.5436717818909283`*^9, 
   3.543671782014359*^9}, 3.543673423276054*^9, {3.5437305191860723`*^9, 
   3.543730525028438*^9}, {3.543737632248684*^9, 3.543737646288025*^9}, {
   3.5437492765475473`*^9, 3.543749281046912*^9}, {3.543751188176433*^9, 
   3.543751190909672*^9}, {3.544358054338921*^9, 3.544358073008992*^9}, 
   3.544359311600253*^9, {3.544359354117573*^9, 3.544359356854383*^9}, {
   3.544359409964542*^9, 3.544359411074267*^9}, {3.5444401119090357`*^9, 
   3.544440113037591*^9}, {3.544441736606061*^9, 3.54444175798232*^9}, {
   3.544524768763411*^9, 3.544524797178083*^9}, {3.54452538059452*^9, 
   3.5445254139587717`*^9}, 3.5449402340798273`*^9, {3.545112695581625*^9, 
   3.545112718913767*^9}, {3.545113535663764*^9, 3.545113657594701*^9}, {
   3.545120868205155*^9, 3.545120884669022*^9}, {3.5451353811909027`*^9, 
   3.545135439279478*^9}, {3.5451355346552134`*^9, 3.545135536394846*^9}, {
   3.545135585269606*^9, 3.54513558999804*^9}, {3.54513564344884*^9, 
   3.545135653002204*^9}, {3.5451359464024343`*^9, 3.545136050153867*^9}, 
   3.5451380497962217`*^9, {3.5453825483514967`*^9, 3.545382561006732*^9}, 
   3.5453832656035213`*^9, 3.5453899700998993`*^9}]
}, Open  ]],

Cell[CellGroupData[{

Cell["Export", "Subsection",
 CellChangeTimes->{{3.545138051351741*^9, 3.545138054860141*^9}}],

Cell[BoxData[
 RowBox[{
  RowBox[{"ExportResults", "[", 
   RowBox[{"results_", ",", "label_", ",", 
    RowBox[{"suffix_:", "\"\<\>\""}], ",", 
    RowBox[{"prefix_:", "\"\<\>\""}], ",", 
    RowBox[{"indices_", " ", ":", " ", 
     RowBox[{"{", 
      RowBox[{"2", ",", "3", ",", "5"}], "}"}]}]}], "]"}], ":=", 
  RowBox[{"Module", "[", 
   RowBox[{
    RowBox[{"{", 
     RowBox[{
     "X", ",", "Y", ",", "Z", ",", "KL", ",", "kl", ",", "plot", ",", "plots",
       ",", "data", ",", "z", ",", "d", ",", "iter"}], "}"}], ",", 
    "\[IndentingNewLine]", 
    RowBox[{
     RowBox[{"X", "=", 
      RowBox[{"results", "[", 
       RowBox[{"[", 
        RowBox[{"All", ",", 
         RowBox[{"indices", "[", 
          RowBox[{"[", "1", "]"}], "]"}]}], "]"}], "]"}]}], ";", 
     "\[IndentingNewLine]", 
     RowBox[{"Y", "=", 
      RowBox[{"results", "[", 
       RowBox[{"[", 
        RowBox[{"All", ",", 
         RowBox[{"indices", "[", 
          RowBox[{"[", "2", "]"}], "]"}]}], "]"}], "]"}]}], ";", 
     "\[IndentingNewLine]", 
     RowBox[{"Z", "=", 
      RowBox[{"results", "[", 
       RowBox[{"[", 
        RowBox[{"All", ",", 
         RowBox[{"indices", "[", 
          RowBox[{"[", "3", "]"}], "]"}]}], "]"}], "]"}]}], ";", 
     "\[IndentingNewLine]", 
     RowBox[{"kl", "=", 
      RowBox[{"results", "[", 
       RowBox[{"[", 
        RowBox[{"All", ",", 
         RowBox[{"Length", "[", 
          RowBox[{"results", "[", 
           RowBox[{"[", "1", "]"}], "]"}], "]"}]}], "]"}], "]"}]}], ";", 
     "\[IndentingNewLine]", 
     RowBox[{"data", "=", 
      RowBox[{"{", "}"}]}], ";", "\[IndentingNewLine]", 
     RowBox[{"For", "[", 
      RowBox[{
       RowBox[{"iter", "=", "1"}], ",", 
       RowBox[{"iter", "\[LessEqual]", 
        RowBox[{"Length", "[", "kl", "]"}]}], ",", 
       RowBox[{"iter", "++"}], ",", 
       RowBox[{"data", "=", 
        RowBox[{"Append", "[", 
         RowBox[{"data", ",", 
          RowBox[{"{", 
           RowBox[{
            RowBox[{"X", "[", 
             RowBox[{"[", "iter", "]"}], "]"}], ",", 
            RowBox[{"Y", "[", 
             RowBox[{"[", "iter", "]"}], "]"}], ",", 
            RowBox[{"Z", "[", 
             RowBox[{"[", "iter", "]"}], "]"}], ",", 
            RowBox[{"kl", "[", 
             RowBox[{"[", "iter", "]"}], "]"}]}], "}"}]}], "]"}]}]}], "]"}], 
     ";", "\[IndentingNewLine]", "\[IndentingNewLine]", 
     RowBox[{"plot", "=", 
      RowBox[{"ListPlot3D", "[", 
       RowBox[{
        RowBox[{
         RowBox[{"Select", "[", 
          RowBox[{"data", ",", 
           RowBox[{
            RowBox[{
             RowBox[{"#", "[", 
              RowBox[{"[", "3", "]"}], "]"}], "\[Equal]", "0"}], "&"}]}], 
          "]"}], "[", 
         RowBox[{"[", 
          RowBox[{"All", ",", 
           RowBox[{"{", 
            RowBox[{"1", ",", "2", ",", "4"}], "}"}]}], "]"}], "]"}], ",", 
        RowBox[{"PlotLabel", "\[Rule]", 
         RowBox[{"Style", "[", 
          RowBox[{"\"\<\[Mu] = 0.0\>\"", ",", "24"}], "]"}]}], ",", 
        "\[IndentingNewLine]", 
        RowBox[{"Axes", "\[Rule]", 
         RowBox[{"{", 
          RowBox[{"True", ",", "True", ",", "True"}], "}"}]}], ",", 
        RowBox[{"TicksStyle", "\[Rule]", 
         RowBox[{"Directive", "[", "14", "]"}]}], ",", 
        RowBox[{"AxesLabel", "\[Rule]", 
         RowBox[{"{", 
          RowBox[{
           RowBox[{"Style", "[", 
            RowBox[{"\"\<\[Phi]\>\"", ",", "24"}], "]"}], ",", 
           RowBox[{"Style", "[", 
            RowBox[{"\"\<\[Psi]\>\"", ",", "24"}], "]"}], ",", 
           RowBox[{"Style", "[", 
            RowBox[{"label", ",", "24"}], "]"}]}], "}"}]}], ",", 
        "\[IndentingNewLine]", 
        RowBox[{"PlotRange", "\[Rule]", 
         RowBox[{"{", 
          RowBox[{
           RowBox[{"{", 
            RowBox[{"0", ",", "5"}], "}"}], ",", 
           RowBox[{"{", 
            RowBox[{"0", ",", "5"}], "}"}], ",", 
           RowBox[{"{", 
            RowBox[{"0", ",", "1"}], "}"}]}], "}"}]}], ",", 
        "\[IndentingNewLine]", 
        RowBox[{"AxesEdge", "\[Rule]", 
         RowBox[{"{", 
          RowBox[{
           RowBox[{"{", 
            RowBox[{"1", ",", 
             RowBox[{"-", "1"}]}], "}"}], ",", 
           RowBox[{"{", 
            RowBox[{
             RowBox[{"-", "1"}], ",", "1"}], "}"}], ",", 
           RowBox[{"{", 
            RowBox[{
             RowBox[{"-", "1"}], ",", "1"}], "}"}]}], "}"}]}], ",", 
        "\[IndentingNewLine]", 
        RowBox[{"Ticks", "\[Rule]", 
         RowBox[{"{", 
          RowBox[{
           RowBox[{"{", 
            RowBox[{"0", ",", "1", ",", "2", ",", "3", ",", "4", ",", "5"}], 
            "}"}], ",", 
           RowBox[{"{", 
            RowBox[{"0", ",", "1", ",", "2", ",", "3", ",", "4", ",", "5"}], 
            "}"}], ",", 
           RowBox[{"{", 
            RowBox[{"0.5", ",", "1.0", ",", "1.5", ",", "2.0"}], "}"}]}], 
          "}"}]}], ",", "\[IndentingNewLine]", 
        RowBox[{"ViewPoint", "\[Rule]", 
         RowBox[{"{", 
          RowBox[{"0", ",", "1", ",", "0.5"}], "}"}]}]}], "]"}]}], ";", 
     "\[IndentingNewLine]", 
     RowBox[{"Export", "[", 
      RowBox[{
       RowBox[{
       "\"\<~/TeX/publications/open/morphcomp/images/\>\"", "<>", "prefix", 
        "<>", "\"\<binary_model_0\>\"", "<>", "suffix", "<>", 
        "\"\<.pdf\>\""}], ",", "plot"}], "]"}], ";", "\[IndentingNewLine]", 
     RowBox[{"Export", "[", 
      RowBox[{
       RowBox[{
       "\"\<~/TeX/publications/open/morphcomp/images/\>\"", "<>", "prefix", 
        "<>", "\"\<binary_model_0\>\"", "<>", "suffix", "<>", 
        "\"\<.png\>\""}], ",", "plot"}], "]"}], ";", "\[IndentingNewLine]", 
     "\[IndentingNewLine]", 
     RowBox[{"plot", "=", 
      RowBox[{"ListPlot3D", "[", 
       RowBox[{
        RowBox[{
         RowBox[{"Select", "[", 
          RowBox[{"data", ",", 
           RowBox[{
            RowBox[{
             RowBox[{"#", "[", 
              RowBox[{"[", "3", "]"}], "]"}], "\[Equal]", "1.0"}], "&"}]}], 
          "]"}], "[", 
         RowBox[{"[", 
          RowBox[{"All", ",", 
           RowBox[{"{", 
            RowBox[{"1", ",", "2", ",", "4"}], "}"}]}], "]"}], "]"}], ",", 
        RowBox[{"PlotLabel", "\[Rule]", 
         RowBox[{"Style", "[", 
          RowBox[{"\"\<\[Mu] = 1.0\>\"", ",", "24"}], "]"}]}], ",", 
        "\[IndentingNewLine]", 
        RowBox[{"Axes", "\[Rule]", 
         RowBox[{"{", 
          RowBox[{"True", ",", "True", ",", "True"}], "}"}]}], ",", 
        RowBox[{"TicksStyle", "\[Rule]", 
         RowBox[{"Directive", "[", "14", "]"}]}], ",", 
        RowBox[{"AxesLabel", "\[Rule]", 
         RowBox[{"{", 
          RowBox[{
           RowBox[{"Style", "[", 
            RowBox[{"\"\<\[Phi]\>\"", ",", "24"}], "]"}], ",", 
           RowBox[{"Style", "[", 
            RowBox[{"\"\<\[Psi]\>\"", ",", "24"}], "]"}], ",", 
           RowBox[{"Style", "[", 
            RowBox[{"label", ",", "24"}], "]"}]}], "}"}]}], ",", 
        "\[IndentingNewLine]", 
        RowBox[{"PlotRange", "\[Rule]", 
         RowBox[{"{", 
          RowBox[{
           RowBox[{"{", 
            RowBox[{"0", ",", "5"}], "}"}], ",", 
           RowBox[{"{", 
            RowBox[{"0", ",", "5"}], "}"}], ",", 
           RowBox[{"{", 
            RowBox[{"0", ",", "1"}], "}"}]}], "}"}]}], ",", 
        "\[IndentingNewLine]", 
        RowBox[{"AxesEdge", "\[Rule]", 
         RowBox[{"{", 
          RowBox[{
           RowBox[{"{", 
            RowBox[{"1", ",", 
             RowBox[{"-", "1"}]}], "}"}], ",", 
           RowBox[{"{", 
            RowBox[{
             RowBox[{"-", "1"}], ",", "1"}], "}"}], ",", 
           RowBox[{"{", 
            RowBox[{
             RowBox[{"-", "1"}], ",", "1"}], "}"}]}], "}"}]}], ",", 
        "\[IndentingNewLine]", 
        RowBox[{"Ticks", "\[Rule]", 
         RowBox[{"{", 
          RowBox[{
           RowBox[{"{", 
            RowBox[{"0", ",", "1", ",", "2", ",", "3", ",", "4", ",", "5"}], 
            "}"}], ",", 
           RowBox[{"{", 
            RowBox[{"0", ",", "1", ",", "2", ",", "3", ",", "4", ",", "5"}], 
            "}"}], ",", 
           RowBox[{"{", 
            RowBox[{"0.5", ",", "1.0", ",", "1.5", ",", "2.0"}], "}"}]}], 
          "}"}]}], ",", "\[IndentingNewLine]", 
        RowBox[{"ViewPoint", "\[Rule]", 
         RowBox[{"{", 
          RowBox[{"0", ",", "1", ",", "0.5"}], "}"}]}]}], "]"}]}], ";", 
     "\[IndentingNewLine]", 
     RowBox[{"Export", "[", 
      RowBox[{
       RowBox[{
       "\"\<~/TeX/publications/open/morphcomp/images/\>\"", "<>", "prefix", 
        "<>", "\"\<binary_model_1\>\"", "<>", "suffix", "<>", 
        "\"\<.pdf\>\""}], ",", "plot"}], "]"}], ";", "\[IndentingNewLine]", 
     RowBox[{"Export", "[", 
      RowBox[{
       RowBox[{
       "\"\<~/TeX/publications/open/morphcomp/images/\>\"", "<>", "prefix", 
        "<>", "\"\<binary_model_1\>\"", "<>", "suffix", "<>", 
        "\"\<.png\>\""}], ",", "plot"}], "]"}], ";", "\[IndentingNewLine]", 
     "\[IndentingNewLine]", 
     RowBox[{"plot", "=", 
      RowBox[{"ListPlot3D", "[", 
       RowBox[{
        RowBox[{
         RowBox[{"Select", "[", 
          RowBox[{"data", ",", 
           RowBox[{
            RowBox[{
             RowBox[{"#", "[", 
              RowBox[{"[", "3", "]"}], "]"}], "\[Equal]", "2.0"}], "&"}]}], 
          "]"}], "[", 
         RowBox[{"[", 
          RowBox[{"All", ",", 
           RowBox[{"{", 
            RowBox[{"1", ",", "2", ",", "4"}], "}"}]}], "]"}], "]"}], ",", 
        RowBox[{"PlotLabel", "\[Rule]", 
         RowBox[{"Style", "[", 
          RowBox[{"\"\<\[Mu] = 2.0\>\"", ",", "24"}], "]"}]}], ",", 
        "\[IndentingNewLine]", 
        RowBox[{"Axes", "\[Rule]", 
         RowBox[{"{", 
          RowBox[{"True", ",", "True", ",", "True"}], "}"}]}], ",", 
        RowBox[{"TicksStyle", "\[Rule]", 
         RowBox[{"Directive", "[", "14", "]"}]}], ",", 
        RowBox[{"AxesLabel", "\[Rule]", 
         RowBox[{"{", 
          RowBox[{
           RowBox[{"Style", "[", 
            RowBox[{"\"\<\[Phi]\>\"", ",", "24"}], "]"}], ",", 
           RowBox[{"Style", "[", 
            RowBox[{"\"\<\[Psi]\>\"", ",", "24"}], "]"}], ",", 
           RowBox[{"Style", "[", 
            RowBox[{"label", ",", "24"}], "]"}]}], "}"}]}], ",", 
        "\[IndentingNewLine]", 
        RowBox[{"PlotRange", "\[Rule]", 
         RowBox[{"{", 
          RowBox[{
           RowBox[{"{", 
            RowBox[{"0", ",", "5"}], "}"}], ",", 
           RowBox[{"{", 
            RowBox[{"0", ",", "5"}], "}"}], ",", 
           RowBox[{"{", 
            RowBox[{"0", ",", "1"}], "}"}]}], "}"}]}], ",", 
        "\[IndentingNewLine]", 
        RowBox[{"AxesEdge", "\[Rule]", 
         RowBox[{"{", 
          RowBox[{
           RowBox[{"{", 
            RowBox[{"1", ",", 
             RowBox[{"-", "1"}]}], "}"}], ",", 
           RowBox[{"{", 
            RowBox[{
             RowBox[{"-", "1"}], ",", "1"}], "}"}], ",", 
           RowBox[{"{", 
            RowBox[{
             RowBox[{"-", "1"}], ",", "1"}], "}"}]}], "}"}]}], ",", 
        "\[IndentingNewLine]", 
        RowBox[{"Ticks", "\[Rule]", 
         RowBox[{"{", 
          RowBox[{
           RowBox[{"{", 
            RowBox[{"0", ",", "1", ",", "2", ",", "3", ",", "4", ",", "5"}], 
            "}"}], ",", 
           RowBox[{"{", 
            RowBox[{"0", ",", "1", ",", "2", ",", "3", ",", "4", ",", "5"}], 
            "}"}], ",", 
           RowBox[{"{", 
            RowBox[{"0.5", ",", "1.0", ",", "1.5", ",", "2.0"}], "}"}]}], 
          "}"}]}], ",", "\[IndentingNewLine]", 
        RowBox[{"ViewPoint", "\[Rule]", 
         RowBox[{"{", 
          RowBox[{"0", ",", "1", ",", "0.5"}], "}"}]}]}], "]"}]}], ";", 
     "\[IndentingNewLine]", 
     RowBox[{"Export", "[", 
      RowBox[{
       RowBox[{
       "\"\<~/TeX/publications/open/morphcomp/images/\>\"", "<>", "prefix", 
        "<>", "\"\<binary_model_2\>\"", "<>", "suffix", "<>", 
        "\"\<.pdf\>\""}], ",", "plot"}], "]"}], ";", "\[IndentingNewLine]", 
     RowBox[{"Export", "[", 
      RowBox[{
       RowBox[{
       "\"\<~/TeX/publications/open/morphcomp/images/\>\"", "<>", "prefix", 
        "<>", "\"\<binary_model_2\>\"", "<>", "suffix", "<>", 
        "\"\<.png\>\""}], ",", "plot"}], "]"}], ";"}]}], 
   "\[IndentingNewLine]", "]"}]}]], "Input",
 InitializationCell->True,
 CellChangeTimes->{{3.541775406896103*^9, 3.541775416966125*^9}, {
   3.541775665413926*^9, 3.5417758464571533`*^9}, {3.5417759029619093`*^9, 
   3.541775922104814*^9}, {3.541776114174081*^9, 3.541776139773419*^9}, {
   3.5417762364277267`*^9, 3.5417762605242033`*^9}, {3.541776394043476*^9, 
   3.541776405761671*^9}, {3.541776523657526*^9, 3.541776539014748*^9}, {
   3.541776592385789*^9, 3.541776616506484*^9}, 3.541776671399947*^9, {
   3.541776762667027*^9, 3.541776799240353*^9}, {3.54177683249185*^9, 
   3.541776865036034*^9}, {3.541776991727358*^9, 3.541777004480525*^9}, {
   3.5417770349489307`*^9, 3.5417770490445023`*^9}, 3.5417770968146763`*^9, {
   3.541777144958251*^9, 3.541777152315933*^9}, {3.5417772020688553`*^9, 
   3.5417772042775373`*^9}, {3.541777237558558*^9, 3.541777242624406*^9}, {
   3.541777437872548*^9, 3.541777440246851*^9}, {3.541777501471698*^9, 
   3.541777508042358*^9}, {3.5417775385936813`*^9, 3.541777576273477*^9}, {
   3.541777612759152*^9, 3.541777637369691*^9}, 3.5418241220173073`*^9, {
   3.5418276958390493`*^9, 3.541827717805414*^9}, {3.5418277549584627`*^9, 
   3.5418278167276707`*^9}, {3.5418279853414383`*^9, 3.541828062545271*^9}, {
   3.541828149768664*^9, 3.54182816275062*^9}, {3.541828586364698*^9, 
   3.541828610253962*^9}, {3.541829112723012*^9, 3.541829158772566*^9}, {
   3.541829239514064*^9, 3.541829394691053*^9}, {3.541829699829113*^9, 
   3.5418297208074293`*^9}, {3.541829831806446*^9, 3.541829834638468*^9}, {
   3.541829887841361*^9, 3.541829941743318*^9}, {3.541830138503504*^9, 
   3.5418301880172873`*^9}, {3.541831104264141*^9, 3.5418311130639133`*^9}, {
   3.541831333630611*^9, 3.541831337174899*^9}, {3.541831424978752*^9, 
   3.541831425102236*^9}, {3.541831757606142*^9, 3.541831760018819*^9}, {
   3.5418318825920963`*^9, 3.541831887062101*^9}, {3.541831958172249*^9, 
   3.5418319952115*^9}, {3.541832063399625*^9, 3.541832071937016*^9}, {
   3.5418321945929413`*^9, 3.5418322083871727`*^9}, {3.5418322474462023`*^9, 
   3.5418322806341467`*^9}, 3.541832395333869*^9, {3.541833434571773*^9, 
   3.541833482057486*^9}, {3.541835395905205*^9, 3.541835475087151*^9}, {
   3.541835571187334*^9, 3.5418355826938143`*^9}, {3.541835664655406*^9, 
   3.541835664840022*^9}, {3.541836248912717*^9, 3.5418364147608137`*^9}, {
   3.5418364978721867`*^9, 3.541836521543808*^9}, {3.541836604605297*^9, 
   3.541836638641917*^9}, {3.541836751746146*^9, 3.5418367698805437`*^9}, {
   3.541836809021661*^9, 3.5418368377843513`*^9}, {3.541852853329813*^9, 
   3.541852854557419*^9}, {3.541854304307015*^9, 3.5418543634719267`*^9}, {
   3.5418544805420933`*^9, 3.541854593402998*^9}, {3.541854668367023*^9, 
   3.541854707743856*^9}, 3.541854947352573*^9, 3.541855029503805*^9, {
   3.541855281241218*^9, 3.541855287735283*^9}, {3.54185572364393*^9, 
   3.5418557313649197`*^9}, {3.54190646974545*^9, 3.541906472670718*^9}, {
   3.542539487327738*^9, 3.5425395180038424`*^9}, {3.542539636263364*^9, 
   3.5425396545109673`*^9}, {3.542540026865135*^9, 3.5425400766484623`*^9}, {
   3.543656536738881*^9, 3.5436565371722918`*^9}, 3.5436702423345003`*^9, {
   3.54367034477864*^9, 3.543670347984272*^9}, {3.5436703919250517`*^9, 
   3.543670398213966*^9}, {3.543670472898098*^9, 3.543670536492243*^9}, {
   3.543670645208927*^9, 3.543670647524723*^9}, {3.5436717818909283`*^9, 
   3.543671782014359*^9}, 3.543673423276054*^9, {3.5437305191860723`*^9, 
   3.543730525028438*^9}, {3.543737632248684*^9, 3.543737646288025*^9}, {
   3.5437492765475473`*^9, 3.543749281046912*^9}, {3.543751188176433*^9, 
   3.543751190909672*^9}, {3.544358054338921*^9, 3.544358073008992*^9}, 
   3.544359311600253*^9, {3.544359354117573*^9, 3.544359356854383*^9}, {
   3.544359409964542*^9, 3.544359411074267*^9}, {3.5444401119090357`*^9, 
   3.544440113037591*^9}, {3.544441736606061*^9, 3.54444175798232*^9}, {
   3.544524768763411*^9, 3.544524797178083*^9}, {3.54452538059452*^9, 
   3.5445254139587717`*^9}, 3.5449402340798273`*^9, {3.545112695581625*^9, 
   3.545112718913767*^9}, {3.545113535663764*^9, 3.545113657594701*^9}, {
   3.545120868205155*^9, 3.545120884669022*^9}, {3.5451353811909027`*^9, 
   3.545135439279478*^9}, {3.5451355346552134`*^9, 3.545135536394846*^9}, {
   3.545135585269606*^9, 3.54513558999804*^9}, {3.54513564344884*^9, 
   3.545135653002204*^9}, {3.5451359464024343`*^9, 3.545136050153867*^9}, {
   3.5451380497962217`*^9, 3.5451380603802*^9}, {3.5451381614262257`*^9, 
   3.5451381722704897`*^9}}]
}, Open  ]]
}, Open  ]],

Cell[CellGroupData[{

Cell["Pendulum Experiment", "Section",
 CellChangeTimes->{{3.564770159662691*^9, 3.564770162774907*^9}, {
  3.564904196085792*^9, 3.564904198361437*^9}, {3.565725774534618*^9, 
  3.565725775096631*^9}}],

Cell[CellGroupData[{

Cell["Simulation", "Subsection",
 CellChangeTimes->{{3.5649042012118063`*^9, 3.564904206107807*^9}}],

Cell[BoxData[{
 RowBox[{
  RowBox[{
   RowBox[{
    RowBox[{"CutOff", "[", 
     RowBox[{"x_", ",", "bias_"}], "]"}], ":=", 
    RowBox[{"If", "[", 
     RowBox[{
      RowBox[{
       RowBox[{"(", 
        RowBox[{"x", "-", 
         RowBox[{
          RowBox[{"Sign", "[", "x", "]"}], "bias"}]}], ")"}], "<", 
       RowBox[{"-", "1"}]}], ",", 
      RowBox[{"-", "1"}], ",", 
      RowBox[{"If", "[", 
       RowBox[{
        RowBox[{
         RowBox[{"(", 
          RowBox[{"x", "-", 
           RowBox[{
            RowBox[{"Sign", "[", "x", "]"}], "bias"}]}], ")"}], ">", "1"}], 
        ",", "1", ",", 
        RowBox[{"(", 
         RowBox[{"x", "-", 
          RowBox[{
           RowBox[{"Sign", "[", "x", "]"}], "bias"}]}], ")"}]}], "]"}]}], 
     "]"}]}], ";"}], "\[IndentingNewLine]"}], "\[IndentingNewLine]", 
 RowBox[{
  RowBox[{
   RowBox[{
    RowBox[{"CalculateForce", "[", 
     RowBox[{"x_", ",", "bias_", ",", "goal_", ",", "noise_", ",", "fMin_"}], 
     "]"}], ":=", 
    RowBox[{"If", "[", 
     RowBox[{
      RowBox[{
       RowBox[{"Abs", "[", 
        RowBox[{"goal", "-", "x", "+", "noise"}], "]"}], "<", "bias"}], ",", 
      "0.0", ",", 
      RowBox[{"CutOff", "[", 
       RowBox[{
        RowBox[{"goal", " ", "-", "x", "+", "noise", "+", 
         RowBox[{
          RowBox[{"Sign", "[", 
           RowBox[{"goal", "-", "x", "+", "noise"}], "]"}], "*", "fMin"}]}], 
        ",", "bias"}], "]"}]}], " ", "]"}]}], ";"}], "\[IndentingNewLine]", 
  "\[IndentingNewLine]"}], "\[IndentingNewLine]", 
 RowBox[{
  RowBox[{
   RowBox[{
    RowBox[{"Options", "[", "Simulation", "]"}], "=", 
    RowBox[{"{", "\[IndentingNewLine]", 
     RowBox[{
      RowBox[{
      "\"\<\!\(\*SubscriptBox[\(F\), \(max\)]\)\>\"", "\[Rule]", "10.0"}], 
      ",", "\[IndentingNewLine]", 
      RowBox[{
      "\"\<\!\(\*SubscriptBox[\(F\), \(min\)]\)\>\"", "\[Rule]", "0.25"}], 
      ",", "\[IndentingNewLine]", 
      RowBox[{"\"\<Bias\>\"", "\[Rule]", "0.0"}], ",", "\[IndentingNewLine]", 
      
      RowBox[{"\"\<Goal\>\"", "\[Rule]", "0.0"}], ",", "\[IndentingNewLine]", 
      
      RowBox[{"\"\<Noise\>\"", "\[Rule]", "0.0"}], ",", "\[IndentingNewLine]", 
      RowBox[{"\"\<Friction\>\"", "\[Rule]", "0.0"}], ",", 
      "\[IndentingNewLine]", 
      RowBox[{"\"\<Time\>\"", "\[Rule]", "90"}], ",", "\[IndentingNewLine]", 
      RowBox[{"\"\<Length\>\"", "\[Rule]", "1"}], ",", "\[IndentingNewLine]", 
      
      RowBox[{"\"\<Gravity\>\"", "\[Rule]", "9.81"}], ",", 
      "\[IndentingNewLine]", 
      RowBox[{"\"\<Mass\>\"", "\[Rule]", "1.0"}]}], "}"}]}], ";"}], 
  "\[IndentingNewLine]"}], "\[IndentingNewLine]", 
 RowBox[{
  RowBox[{
   RowBox[{"Simulation", "[", 
    RowBox[{"OptionsPattern", "[", "Simulation", "]"}], "]"}], ":=", 
   RowBox[{"Module", "[", "\[IndentingNewLine]", 
    RowBox[{
     RowBox[{"{", 
      RowBox[{
      "eqns", ",", "soln", ",", "\[Theta]", ",", "v\[Theta]", ",", "t", ",", 
       "g", ",", "l", ",", "m", ",", "\[Theta]0", ",", "v\[Theta]0", ",", 
       "\[Gamma]", ",", "r", ",", "FMax", ",", "FMin", ",", "bias", ",", 
       "step", ",", "goal", ",", "noise", ",", "f", ",", "s", ",", "a", ",", 
       "iter", ",", "time", ",", "\[Theta]s"}], "}"}], ",", 
     "\[IndentingNewLine]", "\[IndentingNewLine]", 
     RowBox[{
      RowBox[{"FMax", "=", 
       RowBox[{
       "OptionValue", "[", "\"\<\!\(\*SubscriptBox[\(F\), \(max\)]\)\>\"", 
        "]"}]}], ";", "\[IndentingNewLine]", 
      RowBox[{"FMin", "=", 
       RowBox[{
       "OptionValue", "[", "\"\<\!\(\*SubscriptBox[\(F\), \(min\)]\)\>\"", 
        "]"}]}], ";", "\[IndentingNewLine]", 
      RowBox[{"bias", "=", 
       RowBox[{"OptionValue", "[", "\"\<Bias\>\"", "]"}]}], ";", 
      "\[IndentingNewLine]", 
      RowBox[{"goal", "=", 
       RowBox[{"OptionValue", "[", "\"\<Goal\>\"", "]"}]}], ";", 
      "\[IndentingNewLine]", 
      RowBox[{"noise", "=", 
       RowBox[{"OptionValue", "[", "\"\<Noise\>\"", "]"}]}], ";", 
      "\[IndentingNewLine]", 
      RowBox[{"\[Gamma]", "=", 
       RowBox[{"OptionValue", "[", "\"\<Friction\>\"", "]"}]}], ";", 
      "\[IndentingNewLine]", 
      RowBox[{"time", "=", 
       RowBox[{"OptionValue", "[", "\"\<Time\>\"", "]"}]}], ";", 
      "\[IndentingNewLine]", 
      RowBox[{"m", "=", 
       RowBox[{"OptionValue", "[", "\"\<Mass\>\"", "]"}]}], ";", 
      "\[IndentingNewLine]", 
      RowBox[{"g", "=", 
       RowBox[{"OptionValue", "[", "\"\<Gravity\>\"", "]"}]}], ";", 
      "\[IndentingNewLine]", 
      RowBox[{"l", "=", 
       RowBox[{"OptionValue", "[", "\"\<Length\>\"", "]"}]}], ";", 
      "\[IndentingNewLine]", 
      RowBox[{"\[Theta]0", "=", "0"}], ";", "\[IndentingNewLine]", 
      RowBox[{"v\[Theta]0", "=", "0"}], ";", "\[IndentingNewLine]", 
      RowBox[{"step", "=", "0"}], ";", "\[IndentingNewLine]", 
      "\[IndentingNewLine]", 
      RowBox[{"s", "=", 
       RowBox[{"{", "}"}]}], ";", 
      RowBox[{"a", "=", 
       RowBox[{"{", "}"}]}], ";", 
      RowBox[{"\[Theta]s", "=", 
       RowBox[{"{", "}"}]}], ";", "\[IndentingNewLine]", 
      "\[IndentingNewLine]", 
      RowBox[{"For", "[", 
       RowBox[{
        RowBox[{"iter", "=", "1"}], ",", 
        RowBox[{"iter", "\[LessEqual]", "time"}], ",", 
        RowBox[{"iter", "++"}], ",", "\[IndentingNewLine]", 
        RowBox[{
         RowBox[{"r", "=", 
          RowBox[{"goal", "*", 
           RowBox[{"Random", "[", 
            RowBox[{"Real", ",", 
             RowBox[{"{", 
              RowBox[{"noise", ",", 
               RowBox[{"-", "noise"}]}], "}"}]}], "]"}]}]}], ";", 
         "\[IndentingNewLine]", 
         RowBox[{"f", "=", 
          RowBox[{"CalculateForce", "[", 
           RowBox[{
           "v\[Theta]0", ",", "bias", ",", "goal", ",", "r", ",", "FMin"}], 
           "]"}]}], ";", "\[IndentingNewLine]", 
         RowBox[{"s", "=", 
          RowBox[{"Append", "[", 
           RowBox[{"s", ",", "v\[Theta]0"}], "]"}]}], ";", 
         "\[IndentingNewLine]", 
         RowBox[{"a", "=", 
          RowBox[{"Append", "[", 
           RowBox[{"a", ",", "f"}], "]"}]}], ";", "\[IndentingNewLine]", 
         RowBox[{"\[Theta]s", "=", 
          RowBox[{"Append", "[", 
           RowBox[{"\[Theta]s", ",", "\[Theta]0"}], "]"}]}], ";", 
         "\[IndentingNewLine]", 
         RowBox[{"eqns", "=", 
          RowBox[{"{", 
           RowBox[{
            RowBox[{
             RowBox[{
              RowBox[{"l", " ", "m", "*", 
               RowBox[{
                RowBox[{"v\[Theta]", "'"}], "[", "t", "]"}]}], "+", 
              RowBox[{"\[Gamma]", " ", "l", " ", 
               RowBox[{"v\[Theta]", "[", "t", "]"}]}], "+", 
              RowBox[{"m", " ", "g", " ", 
               RowBox[{"Sin", "[", 
                RowBox[{"\[Theta]", "[", "t", "]"}], "]"}]}], "-", 
              RowBox[{"f", " ", "FMax"}]}], "\[Equal]", "0"}], ",", 
            RowBox[{
             RowBox[{"v\[Theta]", "[", "t", "]"}], "\[Equal]", 
             RowBox[{
              RowBox[{"\[Theta]", "'"}], "[", "t", "]"}]}], ",", 
            RowBox[{
             RowBox[{"\[Theta]", "[", "0", "]"}], "\[Equal]", "\[Theta]0"}], 
            ",", 
            RowBox[{
             RowBox[{"v\[Theta]", "[", "0", "]"}], "\[Equal]", 
             "v\[Theta]0"}]}], "}"}]}], ";", "\[IndentingNewLine]", 
         RowBox[{"soln", "=", 
          RowBox[{"Flatten", "[", 
           RowBox[{"NDSolve", "[", 
            RowBox[{"eqns", ",", 
             RowBox[{"{", 
              RowBox[{"\[Theta]", ",", "v\[Theta]"}], "}"}], ",", 
             RowBox[{"{", 
              RowBox[{"t", ",", "0", ",", "0.01"}], "}"}], ",", 
             RowBox[{"Method", "\[Rule]", "Automatic"}]}], "]"}], "]"}]}], 
         ";", "\[IndentingNewLine]", 
         RowBox[{"\[Theta]0", "=", 
          RowBox[{
           RowBox[{"(", 
            RowBox[{"\[Theta]", "/.", "soln"}], ")"}], "[", "0.01", "]"}]}], 
         ";", "\[IndentingNewLine]", 
         RowBox[{"v\[Theta]0", "=", 
          RowBox[{
           RowBox[{"(", 
            RowBox[{"v\[Theta]", "/.", "soln"}], ")"}], "[", "0.01", 
           "]"}]}]}]}], "\[IndentingNewLine]", 
       RowBox[{"(*", 
        RowBox[{
         RowBox[{"Print", "[", 
          RowBox[{
          "\[Theta]0", ",", "\"\< \>\"", ",", "step", ",", "\"\< \>\"", ",", 
           "iter", ",", "\"\< \>\"", ",", "goal"}], "]"}], ";"}], "*)"}], 
       "\[IndentingNewLine]", "]"}], ";", "\[IndentingNewLine]", 
      "\[IndentingNewLine]", 
      RowBox[{"Return", "[", 
       RowBox[{"{", 
        RowBox[{"s", ",", "a"}], "}"}], "]"}], ";"}]}], "\[IndentingNewLine]",
     "]"}]}], ";"}]}], "Input",
 InitializationCell->True,
 CellChangeTimes->{{3.564855165002925*^9, 3.564855295037807*^9}, {
   3.5648553846097507`*^9, 3.56485539979275*^9}, {3.564855557152869*^9, 
   3.564855627272768*^9}, {3.564855676021832*^9, 3.5648556794627*^9}, {
   3.5648559670611887`*^9, 3.564855967287882*^9}, {3.56485630216028*^9, 
   3.564856321622809*^9}, {3.564856352599222*^9, 3.564856488368202*^9}, {
   3.564856603535963*^9, 3.564856609863721*^9}, {3.564857032972147*^9, 
   3.564857053947813*^9}, {3.564857294855723*^9, 3.5648573497772913`*^9}, {
   3.5648575165399103`*^9, 3.564857530032732*^9}, {3.5648575773679037`*^9, 
   3.564857665518602*^9}, {3.564857708966675*^9, 3.5648577175803013`*^9}, {
   3.5648581259350033`*^9, 3.564858180036969*^9}, {3.564858328801539*^9, 
   3.5648583313603783`*^9}, {3.5648584067279673`*^9, 
   3.5648584328765497`*^9}, {3.564858491106493*^9, 3.564858498548273*^9}, {
   3.564858534536563*^9, 3.564858540472027*^9}, {3.564858578007725*^9, 
   3.564858579519856*^9}, {3.564858623908139*^9, 3.5648586257447567`*^9}, {
   3.5648587103589973`*^9, 3.564858716566066*^9}, {3.564858820239327*^9, 
   3.56485884283836*^9}, {3.564892778524407*^9, 3.56489292331607*^9}, {
   3.564892984733645*^9, 3.564892986853508*^9}, {3.564893271792697*^9, 
   3.564893285999715*^9}, 3.564893414021885*^9, {3.564893483155147*^9, 
   3.564893511923465*^9}, {3.564893546988564*^9, 3.564893610505467*^9}, {
   3.564893660901339*^9, 3.564893663637944*^9}, {3.564893917909284*^9, 
   3.564893921995995*^9}, {3.564894759375332*^9, 3.564894814540285*^9}, {
   3.564900541922866*^9, 3.5649005612982483`*^9}, {3.564900591345818*^9, 
   3.5649005924565563`*^9}, {3.564900627960853*^9, 3.564900653171269*^9}, {
   3.564900901500589*^9, 3.564900907277526*^9}, {3.564900947701339*^9, 
   3.5649010106491547`*^9}, {3.5649011424136877`*^9, 
   3.5649011425907307`*^9}, {3.5649012972529573`*^9, 3.564901364504032*^9}, {
   3.564901395634606*^9, 3.564901397445959*^9}, 3.564901429657014*^9, {
   3.564901472418141*^9, 3.564901473160041*^9}, {3.5649015034693317`*^9, 
   3.564901508994691*^9}, {3.564901615763973*^9, 3.5649016339583187`*^9}, {
   3.564902662287166*^9, 3.564902663322278*^9}, {3.56490423891439*^9, 
   3.5649042404562798`*^9}, {3.564911532238798*^9, 3.564911562557352*^9}, {
   3.5649116279879637`*^9, 3.564911629124118*^9}, {3.5649116712080803`*^9, 
   3.56491167626639*^9}, 3.564911744475223*^9, 3.564911962710452*^9, {
   3.564912018223269*^9, 3.564912019959882*^9}, {3.564912167450592*^9, 
   3.564912191824099*^9}, {3.5649123533416433`*^9, 3.564912369717147*^9}, {
   3.564912421352363*^9, 3.564912434752627*^9}, 3.564912469050407*^9, {
   3.564912633318228*^9, 3.564912662487509*^9}, 3.564912970390479*^9, {
   3.564913000551103*^9, 3.564913027853923*^9}, {3.5649155097689247`*^9, 
   3.564915510888118*^9}, {3.564915682597288*^9, 3.5649156834283524`*^9}, {
   3.5649157278999166`*^9, 3.56491572820333*^9}, {3.564928429087311*^9, 
   3.564928834484586*^9}, 3.5649288851143436`*^9, {3.564928918103211*^9, 
   3.564929126693597*^9}, {3.564929261366253*^9, 3.5649292656321573`*^9}, {
   3.5649295466601152`*^9, 3.564929550219623*^9}, 3.5649299697896757`*^9, {
   3.5649300730056267`*^9, 3.564930080079562*^9}, {3.564931447979135*^9, 
   3.564931487280883*^9}, {3.564931685390149*^9, 3.564931716651999*^9}, {
   3.5649317654601593`*^9, 3.564931896480341*^9}, {3.564931948916162*^9, 
   3.564931956846868*^9}, {3.5649320093931*^9, 3.564932010737424*^9}, {
   3.564932055756679*^9, 3.564932079695099*^9}, {3.564932160843295*^9, 
   3.564932161706924*^9}, {3.564932200071478*^9, 3.564932221377276*^9}, {
   3.564932259727818*^9, 3.564932270369923*^9}, {3.564932319482606*^9, 
   3.564932320195436*^9}, {3.564932387450694*^9, 3.564932445181085*^9}, 
   3.564935990452014*^9, {3.5650022221257668`*^9, 3.565002224518495*^9}, {
   3.5650086726006308`*^9, 3.56500867368723*^9}, {3.565009656453312*^9, 
   3.5650096752024403`*^9}, {3.5650097063510447`*^9, 
   3.5650097684645443`*^9}, {3.565009900363312*^9, 3.565009971969459*^9}, {
   3.565020074486059*^9, 3.565020128883008*^9}, {3.565020159806967*^9, 
   3.565020256857914*^9}, {3.56502038521437*^9, 3.5650205035157347`*^9}, {
   3.565020546665432*^9, 3.565020555942811*^9}, {3.5650205874405193`*^9, 
   3.565020605816839*^9}, {3.565020644024507*^9, 3.5650206844384737`*^9}, {
   3.565020882661318*^9, 3.5650209414116983`*^9}, {3.56502098248459*^9, 
   3.565020987515338*^9}, {3.565021020125557*^9, 3.565021055772646*^9}, {
   3.565021137517323*^9, 3.565021170057798*^9}, {3.565021223589363*^9, 
   3.565021372854755*^9}, {3.5650214903875732`*^9, 3.5650214947712708`*^9}, {
   3.565021587697638*^9, 3.5650216279048157`*^9}, {3.565022067964362*^9, 
   3.565022096883636*^9}, 3.565022269009385*^9, {3.565022305145609*^9, 
   3.5650223053837633`*^9}, {3.565026262660243*^9, 3.565026385814465*^9}, 
   3.5650264370870943`*^9, {3.565026483647654*^9, 3.565026511928151*^9}, {
   3.565026593746381*^9, 3.565026599297915*^9}, {3.565026631501047*^9, 
   3.5650266365984573`*^9}, {3.5650266769695377`*^9, 
   3.5650266872678757`*^9}, {3.5650267248852873`*^9, 3.565026760049543*^9}, {
   3.565026879933052*^9, 3.5650268834739017`*^9}, {3.565026940628663*^9, 
   3.565026959623248*^9}, {3.565027156989691*^9, 3.5650271904290247`*^9}, {
   3.565027483617076*^9, 3.565027544541955*^9}, {3.5650277972032824`*^9, 
   3.565027803187052*^9}, 3.565028025253838*^9, {3.5650281338152523`*^9, 
   3.565028137423422*^9}, 3.565065869254148*^9, {3.565074553761148*^9, 
   3.5650745563792753`*^9}, {3.565074614285943*^9, 3.565074643663221*^9}, {
   3.565079695169702*^9, 3.565079695862962*^9}, {3.565703000566503*^9, 
   3.565703006261668*^9}, {3.5657225731486397`*^9, 3.565722577275132*^9}, {
   3.565723086449686*^9, 3.565723095294978*^9}, {3.5657233751910048`*^9, 
   3.565723394916991*^9}, {3.565723430775744*^9, 3.56572343441273*^9}, {
   3.565724420157667*^9, 3.565724428650249*^9}}]
}, Open  ]],

Cell[CellGroupData[{

Cell["Sampling", "Subsection",
 CellChangeTimes->{{3.5649042012118063`*^9, 3.564904214489622*^9}}],

Cell[BoxData[{
 RowBox[{
  RowBox[{
   RowBox[{
    RowBox[{"Binning", "[", 
     RowBox[{"minimum_", ",", "maximum_", ",", "bins_", ",", "data_"}], "]"}],
     ":=", 
    RowBox[{
     RowBox[{
      RowBox[{"Max", "[", 
       RowBox[{"1", ",", 
        RowBox[{"Min", "[", 
         RowBox[{"bins", ",", 
          RowBox[{"(", 
           RowBox[{"1", "+", 
            RowBox[{"Floor", "[", 
             RowBox[{
              RowBox[{
               RowBox[{"(", 
                RowBox[{"#", "-", "minimum"}], ")"}], "/", 
               RowBox[{"(", 
                RowBox[{"maximum", "-", "minimum"}], ")"}]}], "*", 
              RowBox[{"(", 
               RowBox[{"bins", "-", "1"}], ")"}]}], "]"}]}], ")"}]}], "]"}]}],
        "]"}], "&"}], "/@", "data"}]}], ";"}], 
  "\[IndentingNewLine]"}], "\[IndentingNewLine]", 
 RowBox[{
  RowBox[{
   RowBox[{"SamplePolicy", "[", 
    RowBox[{
    "s_Integer", ",", "a_Integer", ",", "n_List", ",", "policy_List"}], "]"}],
    ":=", 
   RowBox[{"Module", "[", 
    RowBox[{
     RowBox[{"{", 
      RowBox[{
       RowBox[{"newN", "=", "n"}], ",", 
       RowBox[{"newP", "=", "policy"}], ",", "row"}], "}"}], ",", 
     "\[IndentingNewLine]", 
     RowBox[{
      RowBox[{
       RowBox[{"newN", "[", 
        RowBox[{"[", "s", "]"}], "]"}], "=", 
       RowBox[{
        RowBox[{"newN", "[", 
         RowBox[{"[", "s", "]"}], "]"}], "+", "1"}]}], ";", 
      "\[IndentingNewLine]", 
      RowBox[{"row", "=", 
       RowBox[{"newP", "[", 
        RowBox[{"[", "s", "]"}], "]"}]}], ";", "\[IndentingNewLine]", 
      RowBox[{"row", "=", 
       RowBox[{
        RowBox[{
         RowBox[{"#", "*", 
          RowBox[{"(", 
           RowBox[{
            RowBox[{"newN", "[", 
             RowBox[{"[", "s", "]"}], "]"}], "/", 
            RowBox[{"(", 
             RowBox[{
              RowBox[{"newN", "[", 
               RowBox[{"[", "s", "]"}], "]"}], "+", "1"}], ")"}]}], ")"}]}], 
         "&"}], "/@", "row"}]}], ";", "\[IndentingNewLine]", 
      RowBox[{
       RowBox[{"row", "[", 
        RowBox[{"[", "a", "]"}], "]"}], "=", 
       RowBox[{
        RowBox[{"row", "[", 
         RowBox[{"[", "a", "]"}], "]"}], "+", 
        RowBox[{"1", "/", 
         RowBox[{"(", 
          RowBox[{
           RowBox[{"newN", "[", 
            RowBox[{"[", "s", "]"}], "]"}], "+", "1"}], ")"}]}]}]}], ";", 
      "\[IndentingNewLine]", 
      RowBox[{
       RowBox[{"newP", "[", 
        RowBox[{"[", "s", "]"}], "]"}], "=", "row"}], ";", 
      "\[IndentingNewLine]", 
      RowBox[{"Return", "[", 
       RowBox[{"{", 
        RowBox[{"newN", ",", "newP"}], "}"}], "]"}]}]}], 
    "\[IndentingNewLine]", "]"}]}], 
  "\[IndentingNewLine]"}], "\[IndentingNewLine]", 
 RowBox[{
  RowBox[{
   RowBox[{"SampleWorldModel", "[", 
    RowBox[{
    "s_Integer", ",", "a_Integer", ",", "sPrime_Integer", ",", "n_List", ",", 
     "wm_List"}], "]"}], ":=", 
   RowBox[{"Module", "[", 
    RowBox[{
     RowBox[{"{", 
      RowBox[{
       RowBox[{"newN", "=", "n"}], ",", 
       RowBox[{"newWM", "=", "wm"}], ",", "row"}], "}"}], ",", 
     "\[IndentingNewLine]", 
     RowBox[{
      RowBox[{
       RowBox[{"newN", "[", 
        RowBox[{"[", 
         RowBox[{"s", ",", "a"}], "]"}], "]"}], "=", 
       RowBox[{
        RowBox[{"newN", "[", 
         RowBox[{"[", 
          RowBox[{"s", ",", "a"}], "]"}], "]"}], "+", "1"}]}], ";", 
      "\[IndentingNewLine]", 
      RowBox[{"row", "=", 
       RowBox[{"newWM", "[", 
        RowBox[{"[", 
         RowBox[{"s", ",", "a"}], "]"}], "]"}]}], ";", "\[IndentingNewLine]", 
      
      RowBox[{"row", "=", 
       RowBox[{
        RowBox[{
         RowBox[{"(", 
          RowBox[{"#", "*", 
           RowBox[{"(", 
            RowBox[{
             RowBox[{"newN", "[", 
              RowBox[{"[", 
               RowBox[{"s", ",", "a"}], "]"}], "]"}], "/", 
             RowBox[{"(", 
              RowBox[{
               RowBox[{"newN", "[", 
                RowBox[{"[", 
                 RowBox[{"s", ",", "a"}], "]"}], "]"}], "+", "1"}], ")"}]}], 
            ")"}]}], ")"}], "&"}], "/@", "row"}]}], ";", 
      "\[IndentingNewLine]", 
      RowBox[{
       RowBox[{"row", "[", 
        RowBox[{"[", "sPrime", "]"}], "]"}], "=", 
       RowBox[{
        RowBox[{"row", "[", 
         RowBox[{"[", "sPrime", "]"}], "]"}], "+", 
        RowBox[{"1", "/", 
         RowBox[{"(", 
          RowBox[{
           RowBox[{"newN", "[", 
            RowBox[{"[", 
             RowBox[{"s", ",", "a"}], "]"}], "]"}], "+", "1"}], ")"}]}]}]}], 
      ";", "\[IndentingNewLine]", 
      RowBox[{
       RowBox[{"newWM", "[", 
        RowBox[{"[", 
         RowBox[{"s", ",", "a"}], "]"}], "]"}], "=", "row"}], ";", 
      "\[IndentingNewLine]", 
      RowBox[{"Return", "[", 
       RowBox[{"{", 
        RowBox[{"newN", ",", "newWM"}], "}"}], "]"}]}]}], 
    "\[IndentingNewLine]", "]"}]}], 
  "\[IndentingNewLine]"}], "\[IndentingNewLine]", 
 RowBox[{
  RowBox[{"SampleSensorDistribution", "[", 
   RowBox[{"s_Integer", ",", "n_Integer", ",", "sensorDistribution_List"}], 
   "]"}], ":=", 
  RowBox[{"Module", "[", 
   RowBox[{
    RowBox[{"{", 
     RowBox[{
      RowBox[{"newN", "=", "n"}], ",", 
      RowBox[{"newS", "=", "sensorDistribution"}]}], "}"}], ",", 
    "\[IndentingNewLine]", 
    RowBox[{
     RowBox[{"newN", "=", 
      RowBox[{"newN", "+", "1"}]}], ";", "\[IndentingNewLine]", 
     RowBox[{"newS", "=", 
      RowBox[{
       RowBox[{
        RowBox[{"#", "*", 
         RowBox[{"(", 
          RowBox[{"newN", "/", 
           RowBox[{"(", 
            RowBox[{"newN", "+", "1"}], ")"}]}], ")"}]}], "&"}], "/@", 
       "newS"}]}], ";", "\[IndentingNewLine]", 
     RowBox[{
      RowBox[{"newS", "[", 
       RowBox[{"[", "s", "]"}], "]"}], "=", 
      RowBox[{
       RowBox[{"newS", "[", 
        RowBox[{"[", "s", "]"}], "]"}], "+", 
       RowBox[{"1", "/", 
        RowBox[{"(", 
         RowBox[{"newN", "+", "1"}], ")"}]}]}]}], ";", "\[IndentingNewLine]", 
     
     RowBox[{"Return", "[", 
      RowBox[{"{", 
       RowBox[{"newN", ",", "newS"}], "}"}], "]"}]}]}], "\[IndentingNewLine]",
    "]"}]}]}], "Input",
 InitializationCell->True,
 CellChangeTimes->{{3.564903117509678*^9, 3.564903119373006*^9}, {
  3.564903870967844*^9, 3.564903911400343*^9}, {3.564903978515656*^9, 
  3.56490398057113*^9}, {3.564914205957054*^9, 3.564914210452656*^9}, {
  3.5649142601712923`*^9, 3.5649142628512907`*^9}, {3.564930960121632*^9, 
  3.564930988513639*^9}, {3.564931024044752*^9, 3.564931024222972*^9}, {
  3.564932345869595*^9, 3.564932347923521*^9}, {3.5665461659605293`*^9, 
  3.566546180582099*^9}}]
}, Open  ]],

Cell[CellGroupData[{

Cell["Measures", "Subsection",
 CellChangeTimes->{{3.564904269707034*^9, 3.564904273259118*^9}}],

Cell[BoxData[
 RowBox[{
  RowBox[{"(*", " ", 
   RowBox[{
    RowBox[{"p", 
     RowBox[{"(", 
      RowBox[{"s", ",", "a", ",", 
       RowBox[{"s", "'"}]}], ")"}]}], " ", "=", " ", 
    RowBox[{"p", 
     RowBox[{"(", 
      RowBox[{"s", ",", 
       RowBox[{"a", ";", 
        RowBox[{"s", "'"}]}]}], ")"}], " ", "p", 
     RowBox[{"(", 
      RowBox[{"s", ";", "a"}], ")"}], " ", "p", 
     RowBox[{"(", "s", ")"}]}]}], " ", "*)"}], "\[IndentingNewLine]", 
  RowBox[{
   RowBox[{"JointDistribution", "[", 
    RowBox[{"worldModel_", ",", "policy_", ",", "sensorDistribution_"}], 
    "]"}], ":=", 
   RowBox[{"Module", "[", 
    RowBox[{
     RowBox[{"{", 
      RowBox[{
      "m", ",", "sDim", ",", "aDim", ",", "s", ",", "a", ",", "sPrime"}], 
      "}"}], ",", "\[IndentingNewLine]", 
     RowBox[{
      RowBox[{
       RowBox[{"{", 
        RowBox[{"sDim", ",", "aDim"}], "}"}], "=", 
       RowBox[{"Dimensions", "[", "policy", "]"}]}], ";", 
      "\[IndentingNewLine]", 
      RowBox[{"m", "=", 
       RowBox[{"Array", "[", 
        RowBox[{
         RowBox[{"0", "&"}], ",", 
         RowBox[{"{", 
          RowBox[{"sDim", ",", "aDim", ",", "sDim"}], "}"}]}], "]"}]}], ";", 
      "\[IndentingNewLine]", 
      RowBox[{"For", "[", 
       RowBox[{
        RowBox[{"s", "=", "1"}], ",", 
        RowBox[{"s", "\[LessEqual]", "sDim"}], ",", 
        RowBox[{"s", "++"}], ",", "\[IndentingNewLine]", 
        RowBox[{"For", "[", 
         RowBox[{
          RowBox[{"a", "=", "1"}], ",", 
          RowBox[{"a", "\[LessEqual]", "aDim"}], ",", 
          RowBox[{"a", "++"}], ",", "\[IndentingNewLine]", 
          RowBox[{"For", "[", 
           RowBox[{
            RowBox[{"sPrime", "=", "1"}], ",", 
            RowBox[{"sPrime", "\[LessEqual]", "sDim"}], ",", 
            RowBox[{"sPrime", "++"}], ",", "\[IndentingNewLine]", 
            RowBox[{
             RowBox[{
              RowBox[{"m", "[", 
               RowBox[{"[", 
                RowBox[{"s", ",", "a", ",", "sPrime"}], "]"}], "]"}], "=", 
              RowBox[{
               RowBox[{"worldModel", "[", 
                RowBox[{"[", 
                 RowBox[{"s", ",", "a", ",", "sPrime"}], "]"}], "]"}], "*", 
               RowBox[{"policy", "[", 
                RowBox[{"[", 
                 RowBox[{"s", ",", "a"}], "]"}], "]"}], "*", 
               RowBox[{"sensorDistribution", "[", 
                RowBox[{"[", "s", "]"}], "]"}]}]}], ";"}]}], 
           "\[IndentingNewLine]", "]"}]}], "\[IndentingNewLine]", "]"}]}], 
       "\[IndentingNewLine]", "]"}], ";", "\[IndentingNewLine]", 
      RowBox[{"Return", "[", "m", "]"}], ";"}]}], "\[IndentingNewLine]", 
    "]"}]}]}]], "Input",
 InitializationCell->True,
 CellChangeTimes->{{3.564904492821601*^9, 3.5649045168281927`*^9}, {
  3.564904562348954*^9, 3.564904685636804*^9}, {3.564904732355894*^9, 
  3.5649049687325*^9}, {3.5649050096178493`*^9, 3.564905010465654*^9}, {
  3.564905040714671*^9, 3.564905075215838*^9}, {3.564905178128495*^9, 
  3.564905178239657*^9}, {3.564905210232283*^9, 3.564905245187744*^9}, {
  3.564905341116229*^9, 3.5649053671351433`*^9}}],

Cell[BoxData[
 RowBox[{
  RowBox[{
   RowBox[{"PA", "[", 
    RowBox[{"worldModel_", ",", "policy_", ",", "sensorDistribution_"}], 
    "]"}], ":=", 
   RowBox[{"Module", "[", 
    RowBox[{
     RowBox[{"{", 
      RowBox[{
      "m", ",", "sDim", ",", "aDim", ",", "s", ",", "sPrime", ",", "a"}], 
      "}"}], ",", "\[IndentingNewLine]", 
     RowBox[{
      RowBox[{
       RowBox[{"{", 
        RowBox[{"sDim", ",", "aDim"}], "}"}], "=", 
       RowBox[{"Dimensions", "[", "policy", "]"}]}], ";", 
      "\[IndentingNewLine]", 
      RowBox[{"m", "=", 
       RowBox[{"Array", "[", 
        RowBox[{
         RowBox[{"0", "&"}], ",", "aDim"}], "]"}]}], ";", 
      "\[IndentingNewLine]", 
      RowBox[{"For", "[", 
       RowBox[{
        RowBox[{"a", "=", "1"}], ",", 
        RowBox[{"a", "\[LessEqual]", "aDim"}], ",", 
        RowBox[{"a", "++"}], ",", "\[IndentingNewLine]", 
        RowBox[{
         RowBox[{
          RowBox[{"m", "[", 
           RowBox[{"[", "a", "]"}], "]"}], "=", 
          RowBox[{"Sum", "[", 
           RowBox[{
            RowBox[{
             RowBox[{"policy", "[", 
              RowBox[{"[", 
               RowBox[{"s", ",", "a"}], "]"}], "]"}], "*", 
             RowBox[{"sensorDistribution", "[", 
              RowBox[{"[", "s", "]"}], "]"}]}], ",", 
            RowBox[{"{", 
             RowBox[{"s", ",", "1", ",", "sDim"}], "}"}]}], "]"}]}], ";"}]}], 
       "\[IndentingNewLine]", "]"}], ";", "\[IndentingNewLine]", 
      RowBox[{"Return", "[", "m", "]"}], ";"}]}], "\[IndentingNewLine]", 
    "]"}]}], ";"}]], "Input",
 InitializationCell->True,
 CellChangeTimes->{{3.564905596477668*^9, 3.564905678475124*^9}, {
  3.564905716214356*^9, 3.564905716344084*^9}}],

Cell[BoxData[
 RowBox[{
  RowBox[{"(*", " ", 
   RowBox[{
    RowBox[{"p", 
     RowBox[{"(", 
      RowBox[{
       RowBox[{"s", "'"}], "|", "s"}], ")"}]}], " ", "=", " ", 
    RowBox[{"sum_a", " ", "p", 
     RowBox[{"(", 
      RowBox[{"s", ",", 
       RowBox[{"a", ";", 
        RowBox[{"s", "'"}]}]}], ")"}], "p", 
     RowBox[{"(", 
      RowBox[{"s", ";", "a"}], ")"}]}]}], " ", "*)"}], "\[IndentingNewLine]", 
  
  RowBox[{
   RowBox[{"WorldKernel", "[", 
    RowBox[{"worldModel_", ",", "policy_", ",", "sensorDistribution_"}], 
    "]"}], ":=", 
   RowBox[{"Module", "[", 
    RowBox[{
     RowBox[{"{", 
      RowBox[{"m", ",", "sDim", ",", "aDim", ",", "s", ",", "sPrime"}], "}"}],
      ",", "\[IndentingNewLine]", 
     RowBox[{
      RowBox[{
       RowBox[{"{", 
        RowBox[{"sDim", ",", "aDim"}], "}"}], "=", 
       RowBox[{"Dimensions", "[", "policy", "]"}]}], ";", 
      "\[IndentingNewLine]", 
      RowBox[{"m", "=", 
       RowBox[{"Array", "[", 
        RowBox[{
         RowBox[{"0", "&"}], ",", 
         RowBox[{"{", 
          RowBox[{"sDim", ",", "sDim"}], "}"}]}], "]"}]}], ";", 
      "\[IndentingNewLine]", 
      RowBox[{"For", "[", 
       RowBox[{
        RowBox[{"s", "=", "1"}], ",", 
        RowBox[{"s", "\[LessEqual]", "sDim"}], ",", 
        RowBox[{"s", "++"}], ",", "\[IndentingNewLine]", 
        RowBox[{"For", "[", 
         RowBox[{
          RowBox[{"sPrime", "=", "1"}], ",", 
          RowBox[{"sPrime", "\[LessEqual]", "sDim"}], ",", 
          RowBox[{"sPrime", "++"}], ",", "\[IndentingNewLine]", 
          RowBox[{
           RowBox[{
            RowBox[{"m", "[", 
             RowBox[{"[", 
              RowBox[{"s", ",", "sPrime"}], "]"}], "]"}], "=", 
            RowBox[{"Sum", "[", 
             RowBox[{
              RowBox[{
               RowBox[{"worldModel", "[", 
                RowBox[{"[", 
                 RowBox[{"s", ",", "a", ",", "sPrime"}], "]"}], "]"}], "*", 
               RowBox[{"policy", "[", 
                RowBox[{"[", 
                 RowBox[{"s", ",", "a"}], "]"}], "]"}]}], ",", 
              RowBox[{"{", 
               RowBox[{"a", ",", "1", ",", "aDim"}], "}"}]}], "]"}]}], 
           ";"}]}], "\[IndentingNewLine]", "]"}]}], "\[IndentingNewLine]", 
       "]"}], ";", "\[IndentingNewLine]", 
      RowBox[{"Return", "[", "m", "]"}], ";"}]}], "\[IndentingNewLine]", 
    "]"}]}]}]], "Input",
 InitializationCell->True,
 CellChangeTimes->{{3.564904492821601*^9, 3.5649045168281927`*^9}, {
   3.564904562348954*^9, 3.564904685636804*^9}, {3.564904732355894*^9, 
   3.5649049687325*^9}, {3.5649050096178493`*^9, 3.564905010465654*^9}, {
   3.564905040714671*^9, 3.564905075215838*^9}, {3.564905178128495*^9, 
   3.564905178239657*^9}, {3.564905210232283*^9, 3.564905245187744*^9}, 
   3.564905341116229*^9, 3.5649054224861317`*^9}],

Cell[BoxData[
 RowBox[{
  RowBox[{"WorldKernelTilde", "[", 
   RowBox[{"worldModel_", ",", "policy_", ",", "sensorDistribution_"}], "]"}],
   ":=", 
  RowBox[{"Module", "[", 
   RowBox[{
    RowBox[{"{", 
     RowBox[{
     "m", ",", "sDim", ",", "aDim", ",", "s", ",", "sPrime", ",", "pa"}], 
     "}"}], ",", "\[IndentingNewLine]", 
    RowBox[{
     RowBox[{
      RowBox[{"{", 
       RowBox[{"sDim", ",", "aDim"}], "}"}], "=", 
      RowBox[{"Dimensions", "[", "policy", "]"}]}], ";", 
     "\[IndentingNewLine]", 
     RowBox[{"pa", "=", 
      RowBox[{"PA", "[", 
       RowBox[{"worldModel", ",", "policy", ",", "sensorDistribution"}], 
       "]"}]}], ";", "\[IndentingNewLine]", 
     RowBox[{"m", "=", 
      RowBox[{"Array", "[", 
       RowBox[{
        RowBox[{"0", "&"}], ",", 
        RowBox[{"{", 
         RowBox[{"sDim", ",", "sDim"}], "}"}]}], "]"}]}], ";", 
     "\[IndentingNewLine]", 
     RowBox[{"For", "[", 
      RowBox[{
       RowBox[{"s", "=", "1"}], ",", 
       RowBox[{"s", "\[LessEqual]", "sDim"}], ",", 
       RowBox[{"s", "++"}], ",", "\[IndentingNewLine]", 
       RowBox[{"For", "[", 
        RowBox[{
         RowBox[{"sPrime", "=", "1"}], ",", 
         RowBox[{"sPrime", "\[LessEqual]", "sDim"}], ",", 
         RowBox[{"sPrime", "++"}], ",", "\[IndentingNewLine]", 
         RowBox[{
          RowBox[{
           RowBox[{"m", "[", 
            RowBox[{"[", 
             RowBox[{"s", ",", "sPrime"}], "]"}], "]"}], "=", 
           RowBox[{"Sum", "[", 
            RowBox[{
             RowBox[{
              RowBox[{"policy", "[", 
               RowBox[{"[", 
                RowBox[{"s", ",", "a"}], "]"}], "]"}], "*", 
              RowBox[{"worldModel", "[", 
               RowBox[{"[", 
                RowBox[{"sPrimePrime", ",", "a", ",", "sPrime"}], "]"}], 
               "]"}], "*", 
              RowBox[{"policy", "[", 
               RowBox[{"[", 
                RowBox[{"sPrimePrime", ",", "a"}], "]"}], "]"}], "*", 
              RowBox[{
               RowBox[{"sensorDistribution", "[", 
                RowBox[{"[", "sPrimePrime", "]"}], "]"}], "/", 
               RowBox[{"pa", "[", 
                RowBox[{"[", "a", "]"}], "]"}]}]}], ",", 
             RowBox[{"{", 
              RowBox[{"a", ",", "1", ",", "aDim"}], "}"}], ",", 
             RowBox[{"{", 
              RowBox[{"sPrimePrime", ",", "1", ",", "sDim"}], "}"}]}], 
            "]"}]}], ";"}]}], "\[IndentingNewLine]", "]"}]}], 
      "\[IndentingNewLine]", "]"}], ";", "\[IndentingNewLine]", 
     RowBox[{"Return", "[", "m", "]"}]}]}], "\[IndentingNewLine]", 
   "]"}]}]], "Input",
 InitializationCell->True,
 CellChangeTimes->{{3.5649065508961782`*^9, 3.564906738961481*^9}, {
  3.564906909454462*^9, 3.564906909538145*^9}, {3.5649069794701147`*^9, 
  3.564906979519238*^9}, {3.564908196714883*^9, 3.564908199419029*^9}, {
  3.5649153218472033`*^9, 3.564915323946478*^9}}],

Cell[BoxData[
 RowBox[{
  RowBox[{"(*", " ", 
   RowBox[{
    RowBox[{"p", 
     RowBox[{"(", 
      RowBox[{
       RowBox[{"s", "'"}], "|", "a"}], ")"}]}], " ", "=", " ", 
    RowBox[{"sum_s", " ", "p", 
     RowBox[{
      RowBox[{"(", 
       RowBox[{
        RowBox[{"s", "'"}], ",", "s", ",", "a"}], ")"}], "/", "p"}], 
     RowBox[{"(", "a", ")"}]}]}], " ", "*)"}], "\[IndentingNewLine]", 
  RowBox[{
   RowBox[{"PAS", "[", 
    RowBox[{"worldModel_", ",", "policy_", ",", "sensorDistribution_"}], 
    "]"}], ":=", 
   RowBox[{"Module", "[", 
    RowBox[{
     RowBox[{"{", 
      RowBox[{
      "m", ",", "sDim", ",", "aDim", ",", "s", ",", "a", ",", "sPrime", ",", 
       "jd", ",", "pa"}], "}"}], ",", "\[IndentingNewLine]", 
     RowBox[{
      RowBox[{
       RowBox[{"{", 
        RowBox[{"sDim", ",", "aDim"}], "}"}], "=", 
       RowBox[{"Dimensions", "[", "policy", "]"}]}], ";", 
      "\[IndentingNewLine]", 
      RowBox[{"pa", "=", 
       RowBox[{"PA", "[", 
        RowBox[{"worldModel", ",", "policy", ",", "sensorDistribution"}], 
        "]"}]}], ";", "\[IndentingNewLine]", 
      RowBox[{"jd", "=", 
       RowBox[{"JointDistribution", "[", 
        RowBox[{"worldModel", ",", "policy", ",", "sensorDistribution"}], 
        "]"}]}], ";", "\[IndentingNewLine]", 
      RowBox[{"m", "=", 
       RowBox[{"Array", "[", 
        RowBox[{
         RowBox[{"0", "&"}], ",", 
         RowBox[{"{", 
          RowBox[{"aDim", ",", "sDim"}], "}"}]}], "]"}]}], ";", 
      "\[IndentingNewLine]", 
      RowBox[{"For", "[", 
       RowBox[{
        RowBox[{"a", "=", "1"}], ",", 
        RowBox[{"a", "\[LessEqual]", "aDim"}], ",", 
        RowBox[{"a", "++"}], ",", "\[IndentingNewLine]", 
        RowBox[{"For", "[", 
         RowBox[{
          RowBox[{"sPrime", "=", "1"}], ",", 
          RowBox[{"sPrime", "\[LessEqual]", "sDim"}], ",", 
          RowBox[{"sPrime", "++"}], ",", "\[IndentingNewLine]", 
          RowBox[{
           RowBox[{
            RowBox[{"m", "[", 
             RowBox[{"[", 
              RowBox[{"a", ",", "sPrime"}], "]"}], "]"}], "=", 
            RowBox[{"Sum", "[", 
             RowBox[{
              RowBox[{
               RowBox[{"jd", "[", 
                RowBox[{"[", 
                 RowBox[{"s", ",", "a", ",", "sPrime"}], "]"}], "]"}], "/", 
               RowBox[{"pa", "[", 
                RowBox[{"[", "a", "]"}], "]"}]}], ",", 
              RowBox[{"{", 
               RowBox[{"s", ",", "1", ",", "sDim"}], "}"}]}], "]"}]}], 
           ";"}]}], "\[IndentingNewLine]", "]"}]}], "\[IndentingNewLine]", 
       "]"}], ";", "\[IndentingNewLine]", 
      RowBox[{"Return", "[", "m", "]"}], ";"}]}], "\[IndentingNewLine]", 
    "]"}]}]}]], "Input",
 InitializationCell->True,
 CellChangeTimes->{{3.564905490172789*^9, 3.564905497923617*^9}, {
  3.5649055592695827`*^9, 3.564905595137047*^9}, {3.564905732840919*^9, 
  3.564905831099393*^9}, {3.564907624854677*^9, 3.564907625126409*^9}}],

Cell[BoxData[
 RowBox[{
  RowBox[{"(*", " ", 
   RowBox[{
    RowBox[{"p", 
     RowBox[{"(", 
      RowBox[{
       RowBox[{"s", "'"}], "|", 
       RowBox[{"do", 
        RowBox[{"(", "a", ")"}]}]}], ")"}]}], "=", " ", 
    RowBox[{"sum_s", " ", "p", 
     RowBox[{"(", 
      RowBox[{
       RowBox[{
        RowBox[{"s", "'"}], "|", "s"}], ",", "a"}], ")"}], "p", 
     RowBox[{"(", "s", ")"}]}]}], " ", "*)"}], "\[IndentingNewLine]", 
  RowBox[{
   RowBox[{"PSPRIMEDOA", "[", 
    RowBox[{"worldModel_", ",", "policy_", ",", "sensorDistribution_"}], 
    "]"}], ":=", 
   RowBox[{"Module", "[", 
    RowBox[{
     RowBox[{"{", 
      RowBox[{
      "m", ",", "sDim", ",", "aDim", ",", "a", ",", "sPrime", ",", "jd", ",", 
       "pa"}], "}"}], ",", "\[IndentingNewLine]", 
     RowBox[{
      RowBox[{
       RowBox[{"{", 
        RowBox[{"sDim", ",", "aDim"}], "}"}], "=", 
       RowBox[{"Dimensions", "[", "policy", "]"}]}], ";", 
      "\[IndentingNewLine]", 
      RowBox[{"m", "=", 
       RowBox[{"Array", "[", 
        RowBox[{
         RowBox[{"0", "&"}], ",", 
         RowBox[{"{", 
          RowBox[{"sDim", ",", "aDim"}], "}"}]}], "]"}]}], ";", 
      "\[IndentingNewLine]", 
      RowBox[{"For", "[", 
       RowBox[{
        RowBox[{"sPrime", "=", "1"}], ",", 
        RowBox[{"sPrime", "\[LessEqual]", 
         RowBox[{"1", "sDim"}]}], ",", 
        RowBox[{"sPrime", "++"}], ",", "\[IndentingNewLine]", 
        RowBox[{"For", "[", 
         RowBox[{
          RowBox[{"a", "=", "1"}], ",", 
          RowBox[{"a", "\[LessEqual]", "aDim"}], ",", 
          RowBox[{"a", "++"}], ",", "\[IndentingNewLine]", 
          RowBox[{
           RowBox[{
            RowBox[{"m", "[", 
             RowBox[{"[", 
              RowBox[{"sPrime", ",", "a"}], "]"}], "]"}], "=", 
            RowBox[{"Sum", "[", 
             RowBox[{
              RowBox[{
               RowBox[{"worldModel", "[", 
                RowBox[{"[", 
                 RowBox[{"s", ",", "a", ",", "sPrime"}], "]"}], "]"}], "*", 
               RowBox[{"sensorDistribution", "[", 
                RowBox[{"[", "s", "]"}], "]"}]}], ",", 
              RowBox[{"{", 
               RowBox[{"s", ",", "1", ",", "sDim"}], "}"}]}], "]"}]}], 
           ";"}]}], "\[IndentingNewLine]", "]"}]}], "\[IndentingNewLine]", 
       "]"}], ";", "\[IndentingNewLine]", 
      RowBox[{"Return", "[", "m", "]"}], ";"}]}], "\[IndentingNewLine]", 
    "]"}]}]}]], "Input",
 InitializationCell->True,
 CellChangeTimes->{{3.564906001862782*^9, 3.564906133556294*^9}}],

Cell[BoxData[
 RowBox[{
  RowBox[{"(*", " ", 
   RowBox[{
    RowBox[{"p", 
     RowBox[{"(", 
      RowBox[{
       RowBox[{"s", "'"}], "|", 
       RowBox[{"do", 
        RowBox[{"(", "s", ")"}]}]}], ")"}]}], "=", " ", 
    RowBox[{"sum_", 
     RowBox[{"{", 
      RowBox[{
       RowBox[{"s", "''"}], ",", "a"}], "}"}], " ", "p", 
     RowBox[{"(", 
      RowBox[{"a", "|", "s"}], ")"}], " ", "p", 
     RowBox[{"(", 
      RowBox[{
       RowBox[{
        RowBox[{"s", "'"}], "|", 
        RowBox[{"s", "''"}]}], ",", "a"}], ")"}], "p", 
     RowBox[{"(", 
      RowBox[{"s", "''"}], ")"}]}]}], " ", "*)"}], "\[IndentingNewLine]", 
  RowBox[{
   RowBox[{"PSPRIMEDOS", "[", 
    RowBox[{"worldModel_", ",", "policy_", ",", "sensorDistribution_"}], 
    "]"}], ":=", 
   RowBox[{"Module", "[", 
    RowBox[{
     RowBox[{"{", 
      RowBox[{
      "m", ",", "sDim", ",", "aDim", ",", "s", ",", "sPrime", ",", "jd", ",", 
       "pa"}], "}"}], ",", "\[IndentingNewLine]", 
     RowBox[{
      RowBox[{
       RowBox[{"{", 
        RowBox[{"sDim", ",", "aDim"}], "}"}], "=", 
       RowBox[{"Dimensions", "[", "policy", "]"}]}], ";", 
      "\[IndentingNewLine]", 
      RowBox[{"m", "=", 
       RowBox[{"Array", "[", 
        RowBox[{
         RowBox[{"0", "&"}], ",", 
         RowBox[{"{", 
          RowBox[{"sDim", ",", "sDim"}], "}"}]}], "]"}]}], ";", 
      "\[IndentingNewLine]", 
      RowBox[{"For", "[", 
       RowBox[{
        RowBox[{"sPrime", "=", "1"}], ",", 
        RowBox[{"sPrime", "\[LessEqual]", 
         RowBox[{"1", "sDim"}]}], ",", 
        RowBox[{"sPrime", "++"}], ",", "\[IndentingNewLine]", 
        RowBox[{"For", "[", 
         RowBox[{
          RowBox[{"s", "=", "1"}], ",", 
          RowBox[{"s", "\[LessEqual]", "sDim"}], ",", 
          RowBox[{"s", "++"}], ",", "\[IndentingNewLine]", 
          RowBox[{
           RowBox[{
            RowBox[{"m", "[", 
             RowBox[{"[", 
              RowBox[{"sPrime", ",", "s"}], "]"}], "]"}], "=", 
            RowBox[{"Sum", "[", 
             RowBox[{
              RowBox[{
               RowBox[{"policy", "[", 
                RowBox[{"[", 
                 RowBox[{"s", ",", "a"}], "]"}], "]"}], "*", 
               RowBox[{"worldModel", "[", 
                RowBox[{"[", 
                 RowBox[{"sPrimePrime", ",", "a", ",", "sPrime"}], "]"}], 
                "]"}], "*", 
               RowBox[{"sensorDistribution", "[", 
                RowBox[{"[", "sPrimePrime", "]"}], "]"}]}], ",", 
              RowBox[{"{", 
               RowBox[{"sPrimePrime", ",", "1", ",", "sDim"}], "}"}], ",", 
              RowBox[{"{", 
               RowBox[{"a", ",", "1", ",", "aDim"}], "}"}]}], "]"}]}], 
           ";"}]}], "\[IndentingNewLine]", "]"}]}], "\[IndentingNewLine]", 
       "]"}], ";", "\[IndentingNewLine]", 
      RowBox[{"Return", "[", "m", "]"}], ";"}]}], "\[IndentingNewLine]", 
    "]"}]}]}]], "Input",
 InitializationCell->True,
 CellChangeTimes->{{3.5649061616408873`*^9, 3.56490630090755*^9}}],

Cell[BoxData[
 RowBox[{
  RowBox[{"ASOCA", "[", 
   RowBox[{"worldModel_", ",", "policy_", ",", "sensorDistribution_"}], "]"}],
   ":=", 
  RowBox[{"Module", "[", 
   RowBox[{
    RowBox[{"{", 
     RowBox[{"jd", ",", "wk", ",", "sum", ",", "sDim", ",", "aDim"}], "}"}], 
    ",", "\[IndentingNewLine]", 
    RowBox[{
     RowBox[{
      RowBox[{"{", 
       RowBox[{"sDim", ",", "aDim"}], "}"}], "=", 
      RowBox[{"Dimensions", "[", "policy", "]"}]}], ";", 
     "\[IndentingNewLine]", 
     RowBox[{"jd", "=", 
      RowBox[{"JointDistribution", "[", 
       RowBox[{"worldModel", ",", "policy", ",", "sensorDistribution"}], 
       "]"}]}], ";", "\[IndentingNewLine]", 
     RowBox[{"wk", "=", 
      RowBox[{"WorldKernel", "[", 
       RowBox[{"worldModel", ",", "policy", ",", "sensorDistribution"}], 
       "]"}]}], ";", "\[IndentingNewLine]", 
     RowBox[{"sum", "=", 
      RowBox[{"Sum", "[", 
       RowBox[{
        RowBox[{
         RowBox[{"jd", "[", 
          RowBox[{"[", 
           RowBox[{"s", ",", "a", ",", "sPrime"}], "]"}], "]"}], "*", 
         RowBox[{"Log", "[", 
          RowBox[{
           RowBox[{"worldModel", "[", 
            RowBox[{"[", 
             RowBox[{"s", ",", "a", ",", "sPrime"}], "]"}], "]"}], "/", 
           RowBox[{"wk", "[", 
            RowBox[{"[", 
             RowBox[{"s", ",", "sPrime"}], "]"}], "]"}]}], "]"}]}], ",", 
        RowBox[{"{", 
         RowBox[{"s", ",", "1", ",", "sDim"}], "}"}], ",", 
        RowBox[{"{", 
         RowBox[{"sPrime", ",", "1", ",", "sDim"}], "}"}], ",", 
        RowBox[{"{", 
         RowBox[{"a", ",", "1", ",", "aDim"}], "}"}]}], "]"}]}], ";", 
     "\[IndentingNewLine]", 
     RowBox[{"Return", "[", 
      RowBox[{"1", "-", 
       RowBox[{"sum", "/", 
        RowBox[{"Log", "[", "sDim", "]"}]}]}], "]"}]}]}], 
   "\[IndentingNewLine]", "]"}]}]], "Input",
 InitializationCell->True,
 CellChangeTimes->{{3.564904279665926*^9, 3.564904330186967*^9}, {
   3.564904389033429*^9, 3.564904409227708*^9}, {3.56490448841784*^9, 
   3.564904491391201*^9}, {3.5649046935784807`*^9, 3.564904721278159*^9}, {
   3.56490497782841*^9, 3.564904991796516*^9}, {3.564905083812243*^9, 
   3.564905186730154*^9}, {3.564905251097931*^9, 3.564905256718936*^9}, {
   3.564905844329874*^9, 3.564905900754322*^9}, {3.564905932804022*^9, 
   3.564905955134636*^9}, {3.5649063371396093`*^9, 3.564906497160631*^9}, {
   3.5649067652957077`*^9, 3.564906871202059*^9}, {3.564907980586405*^9, 
   3.56490799930793*^9}, 3.564913795110117*^9}],

Cell[BoxData[
 RowBox[{
  RowBox[{"CA", "[", 
   RowBox[{"worldModel_", ",", "policy_", ",", "sensorDistribution_"}], "]"}],
   ":=", 
  RowBox[{"Module", "[", 
   RowBox[{
    RowBox[{"{", 
     RowBox[{"psa", ",", "pss", ",", "sum", ",", "sDim", ",", "aDim"}], "}"}],
     ",", "\[IndentingNewLine]", 
    RowBox[{
     RowBox[{
      RowBox[{"{", 
       RowBox[{"sDim", ",", "aDim"}], "}"}], "=", 
      RowBox[{"Dimensions", "[", "policy", "]"}]}], ";", 
     "\[IndentingNewLine]", 
     RowBox[{"psa", "=", 
      RowBox[{"PSPRIMEDOA", "[", 
       RowBox[{"worldModel", ",", "policy", ",", "sensorDistribution"}], 
       "]"}]}], ";", "\[IndentingNewLine]", 
     RowBox[{"pss", "=", 
      RowBox[{"PSPRIMEDOS", "[", 
       RowBox[{"worldModel", ",", "policy", ",", "sensorDistribution"}], 
       "]"}]}], ";", "\[IndentingNewLine]", 
     RowBox[{"sum", "=", 
      RowBox[{"Sum", "[", 
       RowBox[{
        RowBox[{
         RowBox[{"policy", "[", 
          RowBox[{"[", 
           RowBox[{"s", ",", "a"}], "]"}], "]"}], "*", 
         RowBox[{"sensorDistribution", "[", 
          RowBox[{"[", "s", "]"}], "]"}], "*", 
         RowBox[{"psa", "[", 
          RowBox[{"[", 
           RowBox[{"sPrime", ",", "a"}], "]"}], "]"}], "*", 
         RowBox[{"Log", "[", 
          RowBox[{
           RowBox[{"psa", "[", 
            RowBox[{"[", 
             RowBox[{"sPrime", ",", "a"}], "]"}], "]"}], "/", 
           RowBox[{"pss", "[", 
            RowBox[{"[", 
             RowBox[{"sPrime", ",", "s"}], "]"}], "]"}]}], "]"}]}], ",", 
        "\[IndentingNewLine]", 
        RowBox[{"{", 
         RowBox[{"s", ",", "1", ",", "sDim"}], "}"}], ",", 
        RowBox[{"{", 
         RowBox[{"sPrime", ",", "1", ",", "sDim"}], "}"}], ",", 
        RowBox[{"{", 
         RowBox[{"a", ",", "1", ",", "aDim"}], "}"}]}], "]"}]}], ";", 
     "\[IndentingNewLine]", 
     RowBox[{"Return", "[", 
      RowBox[{"1", "-", 
       RowBox[{"sum", "/", 
        RowBox[{"Log", "[", "sDim", "]"}]}]}], "]"}], ";"}]}], 
   "\[IndentingNewLine]", "]"}]}]], "Input",
 InitializationCell->True,
 CellChangeTimes->{{3.564904279665926*^9, 3.564904330186967*^9}, {
  3.564904389033429*^9, 3.564904409227708*^9}, {3.56490448841784*^9, 
  3.564904491391201*^9}, {3.5649046935784807`*^9, 3.564904721278159*^9}, {
  3.56490497782841*^9, 3.564904991796516*^9}, {3.564905083812243*^9, 
  3.564905186730154*^9}, {3.564905251097931*^9, 3.564905256718936*^9}, {
  3.564905844329874*^9, 3.564905900754322*^9}, {3.564905932804022*^9, 
  3.564905955134636*^9}, {3.5649063371396093`*^9, 3.564906497160631*^9}, {
  3.5649067652957077`*^9, 3.564906871202059*^9}, {3.564907980586405*^9, 
  3.56490799930793*^9}, {3.564913795110117*^9, 3.564913797109676*^9}}],

Cell[BoxData[
 RowBox[{
  RowBox[{"ASOCW", "[", 
   RowBox[{"worldModel_", ",", "policy_", ",", "sensorDistribution_"}], "]"}],
   ":=", 
  RowBox[{"Module", "[", 
   RowBox[{
    RowBox[{"{", 
     RowBox[{"jd", ",", "pas", ",", "sum", ",", "sDim", ",", "aDim"}], "}"}], 
    ",", "\[IndentingNewLine]", 
    RowBox[{
     RowBox[{
      RowBox[{"{", 
       RowBox[{"sDim", ",", "aDim"}], "}"}], "=", 
      RowBox[{"Dimensions", "[", "policy", "]"}]}], ";", 
     "\[IndentingNewLine]", 
     RowBox[{"jd", "=", 
      RowBox[{"JointDistribution", "[", 
       RowBox[{"worldModel", ",", "policy", ",", "sensorDistribution"}], 
       "]"}]}], ";", "\[IndentingNewLine]", 
     RowBox[{"pas", "=", 
      RowBox[{"PAS", "[", 
       RowBox[{"worldModel", ",", "policy", ",", "sensorDistribution"}], 
       "]"}]}], ";", "\[IndentingNewLine]", 
     RowBox[{"sum", "=", 
      RowBox[{"Sum", "[", 
       RowBox[{
        RowBox[{
         RowBox[{"jd", "[", 
          RowBox[{"[", 
           RowBox[{"s", ",", "a", ",", "sPrime"}], "]"}], "]"}], "*", 
         RowBox[{"Log", "[", 
          RowBox[{
           RowBox[{"worldModel", "[", 
            RowBox[{"[", 
             RowBox[{"s", ",", "a", ",", "sPrime"}], "]"}], "]"}], "/", 
           RowBox[{"pas", "[", 
            RowBox[{"[", 
             RowBox[{"a", ",", "sPrime"}], "]"}], "]"}]}], "]"}]}], ",", 
        RowBox[{"{", 
         RowBox[{"s", ",", "1", ",", "sDim"}], "}"}], ",", 
        RowBox[{"{", 
         RowBox[{"sPrime", ",", "1", ",", "sDim"}], "}"}], ",", 
        RowBox[{"{", 
         RowBox[{"a", ",", "1", ",", "aDim"}], "}"}]}], "]"}]}], ";", 
     "\[IndentingNewLine]", 
     RowBox[{"Return", "[", 
      RowBox[{"sum", "/", 
       RowBox[{"Log", "[", "sDim", "]"}]}], "]"}], ";"}]}], 
   "\[IndentingNewLine]", "]"}]}]], "Input",
 InitializationCell->True,
 CellChangeTimes->{{3.564904279665926*^9, 3.564904330186967*^9}, {
  3.564904389033429*^9, 3.564904409227708*^9}, {3.56490448841784*^9, 
  3.564904491391201*^9}, {3.5649046935784807`*^9, 3.564904721278159*^9}, {
  3.56490497782841*^9, 3.564904991796516*^9}, {3.564905083812243*^9, 
  3.564905186730154*^9}, {3.564905251097931*^9, 3.564905256718936*^9}, {
  3.564905844329874*^9, 3.564905900754322*^9}, {3.564905932804022*^9, 
  3.564905955134636*^9}, {3.5649063371396093`*^9, 3.564906497160631*^9}, {
  3.5649067652957077`*^9, 3.564906871202059*^9}, {3.564907980586405*^9, 
  3.56490799930793*^9}, {3.564913795110117*^9, 3.5649137987818193`*^9}}],

Cell[BoxData[
 RowBox[{
  RowBox[{"CW", "[", 
   RowBox[{"worldModel_", ",", "policy_", ",", "sensorDistribution_"}], "]"}],
   ":=", 
  RowBox[{"Module", "[", 
   RowBox[{
    RowBox[{"{", 
     RowBox[{"wk", ",", "wkt", ",", "sum", ",", "sDim", ",", "aDim"}], "}"}], 
    ",", "\[IndentingNewLine]", 
    RowBox[{
     RowBox[{
      RowBox[{"{", 
       RowBox[{"sDim", ",", "aDim"}], "}"}], "=", 
      RowBox[{"Dimensions", "[", "policy", "]"}]}], ";", 
     "\[IndentingNewLine]", 
     RowBox[{"wk", "=", 
      RowBox[{"WorldKernel", "[", 
       RowBox[{"worldModel", ",", "policy", ",", "sensorDistribution"}], 
       "]"}]}], ";", "\[IndentingNewLine]", 
     RowBox[{"wkt", "=", 
      RowBox[{"WorldKernelTilde", "[", 
       RowBox[{"worldModel", ",", "policy", ",", "sensorDistribution"}], 
       "]"}]}], ";", "\[IndentingNewLine]", 
     RowBox[{"sum", "=", 
      RowBox[{"Sum", "[", 
       RowBox[{
        RowBox[{
         RowBox[{"wk", "[", 
          RowBox[{"[", 
           RowBox[{"s", ",", "sPrime"}], "]"}], "]"}], "*", 
         RowBox[{"sensorDistribution", "[", 
          RowBox[{"[", "s", "]"}], "]"}], "*", 
         RowBox[{"Log", "[", 
          RowBox[{
           RowBox[{"wk", "[", 
            RowBox[{"[", 
             RowBox[{"s", ",", "sPrime"}], "]"}], "]"}], "/", 
           RowBox[{"wkt", "[", 
            RowBox[{"[", 
             RowBox[{"s", ",", "sPrime"}], "]"}], "]"}]}], "]"}]}], ",", 
        RowBox[{"{", 
         RowBox[{"s", ",", "1", ",", "sDim"}], "}"}], ",", 
        RowBox[{"{", 
         RowBox[{"sPrime", ",", "1", ",", "sDim"}], "}"}]}], "]"}]}], ";", 
     "\[IndentingNewLine]", 
     RowBox[{"Return", "[", 
      RowBox[{"sum", "/", 
       RowBox[{"Log", "[", "sDim", "]"}]}], "]"}], ";"}]}], 
   "\[IndentingNewLine]", "]"}]}]], "Input",
 InitializationCell->True,
 CellChangeTimes->{{3.564904279665926*^9, 3.564904330186967*^9}, {
  3.564904389033429*^9, 3.564904409227708*^9}, {3.56490448841784*^9, 
  3.564904491391201*^9}, {3.5649046935784807`*^9, 3.564904721278159*^9}, {
  3.56490497782841*^9, 3.564904991796516*^9}, {3.564905083812243*^9, 
  3.564905186730154*^9}, {3.564905251097931*^9, 3.564905256718936*^9}, {
  3.564905844329874*^9, 3.564905900754322*^9}, {3.564905932804022*^9, 
  3.564905955134636*^9}, {3.5649063371396093`*^9, 3.564906497160631*^9}, {
  3.5649067652957077`*^9, 3.564906871202059*^9}, {3.564907980586405*^9, 
  3.56490799930793*^9}, {3.564913795110117*^9, 3.5649137987818193`*^9}}],

Cell[BoxData[{
 RowBox[{
  RowBox[{
   RowBox[{"AnalyseExperiment", "[", 
    RowBox[{
     RowBox[{"{", 
      RowBox[{"s_", ",", "a_"}], "}"}], ",", "sBins_", ",", "aBins_", ",", 
     "sMax_"}], "]"}], ":=", 
   RowBox[{"Module", "[", "\[IndentingNewLine]", 
    RowBox[{
     RowBox[{"{", 
      RowBox[{
      "sBinned", ",", "aBinned", ",", "sIndex", ",", "sPrimeIndex", ",", 
       "aIndex", ",", "i", ",", "policyN", ",", "policy", ",", "worldModelN", 
       ",", "worldModel", ",", "sensorDistribution", ",", "sensorN"}], "}"}], 
     ",", "\[IndentingNewLine]", 
     RowBox[{
      RowBox[{"sBinned", "=", 
       RowBox[{"Binning", "[", 
        RowBox[{"0.0", ",", "sMax", ",", "sBins", ",", "s"}], "]"}]}], ";", 
      "\[IndentingNewLine]", 
      RowBox[{"aBinned", "=", 
       RowBox[{"Binning", "[", 
        RowBox[{
         RowBox[{"-", "1.0"}], ",", "1.0", ",", "aBins", ",", "a"}], "]"}]}], 
      ";", "\[IndentingNewLine]", "\[IndentingNewLine]", 
      RowBox[{"policyN", "=", 
       RowBox[{"Array", "[", 
        RowBox[{
         RowBox[{"0", "&"}], ",", "sBins"}], "]"}]}], ";", 
      "\[IndentingNewLine]", 
      RowBox[{"policy", "=", 
       RowBox[{"Array", "[", 
        RowBox[{
         RowBox[{
          RowBox[{"N", "[", 
           RowBox[{"1", "/", "aBins"}], "]"}], "&"}], ",", 
         RowBox[{"{", 
          RowBox[{"sBins", ",", "aBins"}], "}"}]}], "]"}]}], ";", 
      "\[IndentingNewLine]", "\[IndentingNewLine]", 
      RowBox[{"worldModelN", "=", 
       RowBox[{"Array", "[", 
        RowBox[{
         RowBox[{"0", "&"}], ",", 
         RowBox[{"{", 
          RowBox[{"sBins", ",", "aBins"}], "}"}]}], "]"}]}], ";", 
      "\[IndentingNewLine]", 
      RowBox[{"worldModel", "=", 
       RowBox[{"Array", "[", 
        RowBox[{
         RowBox[{
          RowBox[{"N", "[", 
           RowBox[{"1", "/", "sBins"}], "]"}], "&"}], ",", 
         RowBox[{"{", 
          RowBox[{"sBins", ",", "aBins", ",", "sBins"}], "}"}]}], "]"}]}], 
      ";", "\[IndentingNewLine]", "\[IndentingNewLine]", 
      RowBox[{"sensorDistribution", "=", 
       RowBox[{"Array", "[", 
        RowBox[{
         RowBox[{
          RowBox[{"N", "[", 
           RowBox[{"1", "/", "sBins"}], "]"}], "&"}], ",", "sBins"}], "]"}]}],
       ";", "\[IndentingNewLine]", 
      RowBox[{"sensorN", "=", "0"}], ";", "\[IndentingNewLine]", 
      "\[IndentingNewLine]", 
      RowBox[{"For", "[", 
       RowBox[{
        RowBox[{"i", "=", "1"}], ",", 
        RowBox[{"i", "<", 
         RowBox[{"Length", "[", "s", "]"}]}], ",", 
        RowBox[{"i", "++"}], ",", "\[IndentingNewLine]", 
        RowBox[{
         RowBox[{"sIndex", "=", 
          RowBox[{"sBinned", "[", 
           RowBox[{"[", "i", "]"}], "]"}]}], ";", "\[IndentingNewLine]", 
         RowBox[{"sPrimeIndex", "=", 
          RowBox[{"sBinned", "[", 
           RowBox[{"[", 
            RowBox[{"i", "+", "1"}], "]"}], "]"}]}], ";", 
         "\[IndentingNewLine]", 
         RowBox[{"aIndex", "=", 
          RowBox[{"aBinned", "[", 
           RowBox[{"[", "i", "]"}], "]"}]}], ";", "\[IndentingNewLine]", 
         "\[IndentingNewLine]", 
         RowBox[{
          RowBox[{"{", 
           RowBox[{"policyN", ",", "policy"}], "}"}], "=", 
          RowBox[{"SamplePolicy", "[", 
           RowBox[{"sIndex", ",", "aIndex", ",", "policyN", ",", "policy"}], 
           "]"}]}], ";", "\[IndentingNewLine]", 
         RowBox[{
          RowBox[{"{", 
           RowBox[{"sensorN", ",", "sensorDistribution"}], "}"}], "=", 
          RowBox[{"SampleSensorDistribution", "[", 
           RowBox[{"sIndex", ",", "sensorN", ",", "sensorDistribution"}], 
           "]"}]}], ";", "\[IndentingNewLine]", 
         RowBox[{
          RowBox[{"{", 
           RowBox[{"worldModelN", ",", "worldModel"}], "}"}], "=", 
          RowBox[{"SampleWorldModel", "[", 
           RowBox[{
           "sIndex", ",", "aIndex", ",", "sPrimeIndex", ",", "worldModelN", 
            ",", "worldModel"}], "]"}]}], ";"}]}], "\[IndentingNewLine]", 
       "]"}], ";", "\[IndentingNewLine]", 
      RowBox[{"Return", "[", 
       RowBox[{"{", "\[IndentingNewLine]", 
        RowBox[{
         RowBox[{"ASOCA", "[", 
          RowBox[{"worldModel", ",", "policy", ",", "sensorDistribution"}], 
          "]"}], ",", "\[IndentingNewLine]", 
         RowBox[{"CA", "[", 
          RowBox[{"worldModel", ",", "policy", ",", "sensorDistribution"}], 
          "]"}], ",", "\[IndentingNewLine]", 
         RowBox[{"ASOCW", "[", 
          RowBox[{"worldModel", ",", "policy", ",", "sensorDistribution"}], 
          "]"}], ",", "\[IndentingNewLine]", 
         RowBox[{"CW", "[", 
          RowBox[{"worldModel", ",", "policy", ",", "sensorDistribution"}], 
          "]"}]}], "}"}], "]"}]}]}], "\[IndentingNewLine]", 
    RowBox[{"(*", 
     RowBox[{"Return", "[", 
      RowBox[{"{", 
       RowBox[{"worldModel", ",", "policy", ",", "sensorDistribution"}], 
       "}"}], "]"}], "*)"}], "\[IndentingNewLine]", "]"}]}], 
  "\[IndentingNewLine]"}], "\[IndentingNewLine]", 
 RowBox[{
  RowBox[{
   RowBox[{"AvgExp", "[", 
    RowBox[{"n_", ",", "bias_", ",", "noise_", ",", "bins_", ",", "max_"}], 
    "]"}], ":=", 
   RowBox[{"Mean", "[", 
    RowBox[{"Table", "[", 
     RowBox[{
      RowBox[{"AnalyseExperiment", "[", 
       RowBox[{
        RowBox[{"Simulation", "[", "\[IndentingNewLine]", 
         RowBox[{
          RowBox[{
          "\"\<\!\(\*SubscriptBox[\(F\), \(max\)]\)\>\"", "\[Rule]", "10.0"}],
           ",", "\[IndentingNewLine]", 
          RowBox[{"\"\<Bias\>\"", "\[Rule]", "bias"}], ",", 
          "\[IndentingNewLine]", 
          RowBox[{"\"\<Goal\>\"", "\[Rule]", 
           RowBox[{"2", "\[Pi]"}]}], ",", "\[IndentingNewLine]", 
          RowBox[{"\"\<Noise\>\"", "\[Rule]", "noise"}], ",", 
          "\[IndentingNewLine]", 
          RowBox[{"\"\<Mass\>\"", "\[Rule]", "1"}], ",", 
          "\[IndentingNewLine]", 
          RowBox[{"\"\<Friction\>\"", "\[Rule]", "0.0"}], ",", 
          "\[IndentingNewLine]", 
          RowBox[{"\"\<Gravity\>\"", "\[Rule]", "9.81"}], ",", 
          "\[IndentingNewLine]", 
          RowBox[{
          "\"\<\!\(\*SubscriptBox[\(F\), \(min\)]\)\>\"", "\[Rule]", "0.25"}],
           ",", "\[IndentingNewLine]", 
          RowBox[{"\"\<Time\>\"", "\[Rule]", "5000"}]}], "]"}], ",", "bins", 
        ",", "bins", ",", "max"}], "]"}], ",", 
      RowBox[{"{", 
       RowBox[{"i", ",", "1", ",", "n"}], "}"}]}], "]"}], "]"}]}], 
  ";"}]}], "Input",
 InitializationCell->True,
 CellChangeTimes->{{3.5648552977641773`*^9, 3.564855303537739*^9}, {
   3.5648553416680727`*^9, 3.564855378692132*^9}, {3.564855475401699*^9, 
   3.564855507469902*^9}, {3.564855550847208*^9, 3.564855551485632*^9}, {
   3.564855600125185*^9, 3.564855600964137*^9}, {3.564855783498159*^9, 
   3.564855785368721*^9}, {3.564855823218224*^9, 3.564855824016758*^9}, {
   3.564855859001286*^9, 3.564855859361733*^9}, {3.5648558897300997`*^9, 
   3.564855903449772*^9}, {3.5648559852821503`*^9, 3.564855987561163*^9}, {
   3.5648560193220778`*^9, 3.56485602331393*^9}, 3.564856085493981*^9, {
   3.564856503625951*^9, 3.5648565074111156`*^9}, {3.5648565389388323`*^9, 
   3.5648566586510277`*^9}, {3.5648566958193703`*^9, 
   3.5648567504941177`*^9}, {3.564856825886385*^9, 3.564856927202385*^9}, {
   3.564856959262928*^9, 3.564856978432078*^9}, {3.5648570142228413`*^9, 
   3.5648570188744164`*^9}, {3.56485705670542*^9, 3.564857194940407*^9}, {
   3.564857273683733*^9, 3.5648572912758217`*^9}, {3.564857420926565*^9, 
   3.5648574698295193`*^9}, 3.564857741296907*^9, {3.564857786553431*^9, 
   3.564857841930491*^9}, {3.564857878439845*^9, 3.5648578957262163`*^9}, {
   3.564858143932262*^9, 3.564858144171924*^9}, {3.564858339032745*^9, 
   3.564858399357133*^9}, {3.564858444565442*^9, 3.564858466713485*^9}, {
   3.564858506167287*^9, 3.564858512579875*^9}, {3.5648585465234537`*^9, 
   3.564858741215349*^9}, {3.564858776520924*^9, 3.5648588159785023`*^9}, {
   3.5648588493701982`*^9, 3.564858877969099*^9}, {3.564892886988916*^9, 
   3.5648928938595257`*^9}, {3.564892944577188*^9, 3.564892958486231*^9}, {
   3.564893016844941*^9, 3.564893026539899*^9}, {3.564893125920268*^9, 
   3.564893139024852*^9}, {3.564893291252076*^9, 3.564893292931432*^9}, {
   3.564893532494997*^9, 3.564893532710359*^9}, {3.5648935739222403`*^9, 
   3.564893578102174*^9}, {3.5648936177336197`*^9, 3.564893650431625*^9}, {
   3.564893700759986*^9, 3.564893700950716*^9}, {3.564893944262501*^9, 
   3.564893954014802*^9}, {3.564894328264045*^9, 3.564894340761306*^9}, {
   3.564894401196074*^9, 3.564894401448763*^9}, {3.564894637880167*^9, 
   3.5648946533838654`*^9}, {3.564894764650185*^9, 3.564894785296433*^9}, {
   3.5648948187911873`*^9, 3.564894824424749*^9}, {3.564900497163869*^9, 
   3.564900537427753*^9}, {3.564900659828101*^9, 3.5649007068672247`*^9}, {
   3.564901017300563*^9, 3.564901068154688*^9}, {3.564901103682561*^9, 
   3.564901105569071*^9}, {3.564901161385421*^9, 3.564901172911515*^9}, {
   3.564901475729776*^9, 3.564901639214932*^9}, {3.564901810489439*^9, 
   3.564901886108021*^9}, {3.564901919021942*^9, 3.564902035585328*^9}, {
   3.5649020783483753`*^9, 3.564902104543371*^9}, {3.564902214398323*^9, 
   3.564902224588513*^9}, {3.5649023353485403`*^9, 3.564902350034833*^9}, {
   3.564902491687348*^9, 3.564902620045128*^9}, {3.5649026669767933`*^9, 
   3.564902706300047*^9}, {3.564902832139287*^9, 3.5649028334165173`*^9}, {
   3.56490301511213*^9, 3.564903177740017*^9}, {3.564903925363529*^9, 
   3.564904182157699*^9}, 3.564904221266983*^9, {3.564904263785791*^9, 
   3.5649042640656757`*^9}, {3.564904336897236*^9, 3.564904378169899*^9}, {
   3.564904417568478*^9, 3.564904422794306*^9}, {3.564905283958413*^9, 
   3.564905299040039*^9}, {3.564906931503401*^9, 3.564906932656375*^9}, {
   3.564906992508301*^9, 3.564906997245029*^9}, {3.5649128343732367`*^9, 
   3.564912840587295*^9}, {3.564914955961545*^9, 3.564914963193211*^9}, {
   3.56493606347191*^9, 3.564936065271468*^9}, {3.565027284030884*^9, 
   3.565027291286162*^9}, {3.56502816063754*^9, 3.565028162195284*^9}, {
   3.5650658239943647`*^9, 3.565065824367275*^9}, {3.565065880333096*^9, 
   3.565065882388104*^9}, {3.5650699968821297`*^9, 3.565069996980278*^9}, {
   3.56507582832474*^9, 3.5650758293149767`*^9}, {3.565083636420467*^9, 
   3.5650836378724213`*^9}, {3.565094558782098*^9, 3.56509456101868*^9}, {
   3.565095095594508*^9, 3.5650950959454107`*^9}, {3.565096436711536*^9, 
   3.565096436837585*^9}, {3.565097151256706*^9, 3.565097151625106*^9}, {
   3.5650973862600594`*^9, 3.5650973864076223`*^9}, {3.565097633308321*^9, 
   3.565097633458289*^9}, {3.565098061702325*^9, 3.5650980618170843`*^9}, {
   3.565767945257578*^9, 3.5657679458531837`*^9}, {3.565768060805135*^9, 
   3.565768060950233*^9}, {3.565773727181777*^9, 3.565773727338457*^9}, {
   3.5657739187332697`*^9, 3.565773918853541*^9}}]
}, Open  ]],

Cell[CellGroupData[{

Cell["Plot", "Subsection",
 CellChangeTimes->{{3.565600930701345*^9, 3.565600938685*^9}}],

Cell[BoxData[
 RowBox[{
  RowBox[{"PlotData", "[", 
   RowBox[{"data_", ",", "label_", ",", "y_", ",", "y2_", ",", "name_"}], 
   "]"}], ":=", 
  RowBox[{"Module", "[", 
   RowBox[{
    RowBox[{"{", 
     RowBox[{
     "plot", ",", "cplot", ",", "ccplot", ",", "colors", ",", "labels", ",", 
      "min", ",", "max", ",", "legend"}], "}"}], ",", "\[IndentingNewLine]", 
    "\[IndentingNewLine]", 
    RowBox[{
     RowBox[{"plot", "=", 
      RowBox[{"ListPlot3D", "[", 
       RowBox[{"data", ",", 
        RowBox[{"ImageSize", "\[Rule]", "300"}], ",", 
        RowBox[{"ViewPoint", "\[Rule]", 
         RowBox[{"{", 
          RowBox[{
           RowBox[{"-", "1"}], ",", 
           RowBox[{"-", "1"}], ",", "y"}], "}"}]}], ",", 
        RowBox[{"PlotRange", "\[Rule]", "Full"}], ",", 
        RowBox[{"TicksStyle", "\[Rule]", 
         RowBox[{"Directive", "[", "18", "]"}]}], ",", 
        RowBox[{"ImageMargins", "\[Rule]", 
         RowBox[{"{", 
          RowBox[{
           RowBox[{"{", 
            RowBox[{"0", ",", "0"}], "}"}], ",", 
           RowBox[{"{", 
            RowBox[{"0", ",", "20"}], "}"}]}], "}"}]}]}], "]"}]}], ";", 
     "\[IndentingNewLine]", "\[IndentingNewLine]", 
     RowBox[{"max", "=", 
      RowBox[{"ToString", "[", 
       RowBox[{"Round", "[", 
        RowBox[{
         RowBox[{"Max", "[", 
          RowBox[{"data", "[", 
           RowBox[{"[", 
            RowBox[{"All", ",", "3"}], "]"}], "]"}], "]"}], ",", "0.01"}], 
        "]"}], "]"}]}], ";", "\[IndentingNewLine]", 
     RowBox[{"min", "=", 
      RowBox[{"ToString", "[", 
       RowBox[{"Round", "[", 
        RowBox[{
         RowBox[{"Min", "[", 
          RowBox[{"data", "[", 
           RowBox[{"[", 
            RowBox[{"All", ",", "3"}], "]"}], "]"}], "]"}], ",", "0.01"}], 
        "]"}], "]"}]}], ";", "\[IndentingNewLine]", "\[IndentingNewLine]", 
     RowBox[{"legend", "=", 
      RowBox[{"Grid", "[", 
       RowBox[{
        RowBox[{"{", "\[IndentingNewLine]", 
         RowBox[{
          RowBox[{"{", 
           RowBox[{"Style", "[", 
            RowBox[{"max", ",", "14"}], "]"}], "}"}], ",", 
          "\[IndentingNewLine]", 
          RowBox[{"{", 
           RowBox[{"Rotate", "[", 
            RowBox[{"colors", ",", 
             RowBox[{"\[Pi]", "/", "2"}]}], "]"}], "}"}], ",", 
          "\[IndentingNewLine]", 
          RowBox[{"{", 
           RowBox[{"Style", "[", 
            RowBox[{"min", ",", "14"}], "]"}], "}"}]}], "\[IndentingNewLine]",
          "}"}], ",", 
        RowBox[{"Alignment", "\[Rule]", 
         RowBox[{"{", 
          RowBox[{"Center", ",", "Top"}], "}"}]}], ",", 
        RowBox[{"Frame", "\[Rule]", "None"}]}], "]"}]}], ";", 
     "\[IndentingNewLine]", "\[IndentingNewLine]", 
     RowBox[{"cplot", "=", "\[IndentingNewLine]", 
      RowBox[{"ListContourPlot", "[", 
       RowBox[{"data", ",", "\[IndentingNewLine]", 
        RowBox[{"ImageSize", "\[Rule]", "200"}], ",", "\[IndentingNewLine]", 
        RowBox[{"PlotRange", "\[Rule]", "Full"}], ",", "\[IndentingNewLine]", 
        
        RowBox[{"FrameStyle", "\[Rule]", 
         RowBox[{"Directive", "[", "18", "]"}]}], ",", "\[IndentingNewLine]", 
        
        RowBox[{"RotateLabel", "\[Rule]", "False"}], ",", 
        "\[IndentingNewLine]", 
        RowBox[{"FrameLabel", "\[Rule]", 
         RowBox[{"{", 
          RowBox[{
           RowBox[{"Style", "[", 
            RowBox[{"\"\<\[Beta]\>\"", ",", "24"}], "]"}], ",", 
           RowBox[{"Style", "[", 
            RowBox[{"\"\<\[Eta]\>\"", ",", "24"}], "]"}]}], "}"}]}], ",", 
        "\[IndentingNewLine]", 
        RowBox[{"ImageMargins", "\[Rule]", 
         RowBox[{"{", 
          RowBox[{
           RowBox[{"{", 
            RowBox[{"0", ",", "0"}], "}"}], ",", 
           RowBox[{"{", 
            RowBox[{"0", ",", "20"}], "}"}]}], "}"}]}]}], "]"}]}], ";", 
     "\[IndentingNewLine]", "\[IndentingNewLine]", 
     RowBox[{"labels", "=", 
      RowBox[{"Graphics", "[", "\[IndentingNewLine]", 
       RowBox[{"{", "\[IndentingNewLine]", 
        RowBox[{
         RowBox[{"Text", "[", 
          RowBox[{
           RowBox[{"Style", "[", 
            RowBox[{"\"\<\[Eta]\>\"", ",", "24"}], "]"}], ",", 
           RowBox[{"{", 
            RowBox[{"50", ",", "60"}], "}"}]}], "]"}], ",", 
         "\[IndentingNewLine]", 
         RowBox[{"Text", "[", 
          RowBox[{
           RowBox[{"Style", "[", 
            RowBox[{"\"\<\[Beta]\>\"", ",", "24"}], "]"}], ",", 
           RowBox[{"{", 
            RowBox[{"275", ",", "60"}], "}"}]}], "]"}], ",", 
         "\[IndentingNewLine]", 
         RowBox[{"Text", "[", 
          RowBox[{
           RowBox[{"Style", "[", 
            RowBox[{"label", ",", "24"}], "]"}], ",", 
           RowBox[{"{", 
            RowBox[{"10", ",", 
             RowBox[{"197", "+", "y2"}]}], "}"}], ",", 
           RowBox[{"{", 
            RowBox[{
             RowBox[{"-", "1"}], ",", "0"}], "}"}]}], "]"}]}], 
        "\[IndentingNewLine]", "}"}], "\[IndentingNewLine]", "]"}]}], ";", 
     "\[IndentingNewLine]", "\[IndentingNewLine]", 
     RowBox[{"plot", "=", 
      RowBox[{"Rasterize", "[", 
       RowBox[{"plot", ",", 
        RowBox[{"RasterSize", "\[Rule]", "400"}], ",", 
        RowBox[{"ImageSize", "\[Rule]", "300"}]}], "]"}]}], ";", 
     "\[IndentingNewLine]", 
     RowBox[{"plot", "=", 
      RowBox[{"Show", "[", 
       RowBox[{"{", 
        RowBox[{"plot", ",", "labels"}], "}"}], "]"}]}], ";", 
     "\[IndentingNewLine]", "\[IndentingNewLine]", 
     RowBox[{"Export", "[", 
      RowBox[{
       RowBox[{
       "exportDir", "<>", "\"\<rotator_results_\>\"", "<>", "name", "<>", 
        "\"\<.png\>\""}], ",", "plot"}], "]"}], ";", "\[IndentingNewLine]", 
     RowBox[{"Export", "[", 
      RowBox[{
       RowBox[{
       "exportDir", "<>", "\"\<rotator_results_\>\"", "<>", "name", "<>", 
        "\"\<_2D.png\>\""}], ",", "cplot"}], "]"}], ";", 
     "\[IndentingNewLine]", 
     RowBox[{"Export", "[", 
      RowBox[{
       RowBox[{
       "exportDir", "<>", "\"\<rotator_results_\>\"", "<>", "name", "<>", 
        "\"\<_legend.png\>\""}], ",", "legend"}], "]"}], ";", 
     "\[IndentingNewLine]", "\[IndentingNewLine]", 
     RowBox[{"Return", "[", 
      RowBox[{"Grid", "[", 
       RowBox[{"{", 
        RowBox[{
         RowBox[{"{", 
          RowBox[{"SpanFromLeft", ",", "plot"}], "}"}], ",", 
         RowBox[{"{", 
          RowBox[{"cplot", ",", "legend"}], "}"}]}], "}"}], "]"}], "]"}]}]}], 
   "\[IndentingNewLine]", "]"}]}]], "Input",
 InitializationCell->True,
 CellChangeTimes->{{3.5655988560683727`*^9, 3.5655989934405746`*^9}, {
   3.56559919318677*^9, 3.565599212962772*^9}, {3.5655992536902523`*^9, 
   3.565599539427737*^9}, {3.565599705591261*^9, 3.565599933830291*^9}, {
   3.565600010197163*^9, 3.5656001306364326`*^9}, {3.565600177256155*^9, 
   3.565600249716539*^9}, {3.565600474358549*^9, 3.565600632124235*^9}, {
   3.565600721609674*^9, 3.5656008759671*^9}, {3.565600956780817*^9, 
   3.5656009807073317`*^9}, {3.565601046024984*^9, 3.5656010748921127`*^9}, {
   3.5656011112414227`*^9, 3.565601112177239*^9}, {3.565601150640697*^9, 
   3.565601151843251*^9}, {3.5656014511990643`*^9, 3.565601459215479*^9}, {
   3.5656096740754538`*^9, 3.565609679813019*^9}, 3.565633196255476*^9, {
   3.565642898536228*^9, 3.5656429047878923`*^9}, 3.565643391049921*^9, {
   3.566542117471319*^9, 3.5665421292934427`*^9}, {3.5665433426050463`*^9, 
   3.566543411601902*^9}, 3.566543622524893*^9, {3.566543795396574*^9, 
   3.566543804329364*^9}, 3.566544099675889*^9, 3.566544153956997*^9, {
   3.566545035942487*^9, 3.566545101619708*^9}, {3.566545136255485*^9, 
   3.566545141113387*^9}, {3.566545312423787*^9, 3.566545313455122*^9}, {
   3.567832128478916*^9, 3.5678321594068127`*^9}, {3.567832395687196*^9, 
   3.5678324634028482`*^9}, {3.567832698945423*^9, 3.5678326994251623`*^9}, {
   3.567833011651429*^9, 3.5678330145296907`*^9}, {3.567833052469966*^9, 
   3.56783305275758*^9}, {3.5678331141948833`*^9, 3.567833134097312*^9}, {
   3.567833167800737*^9, 3.567833294395833*^9}, {3.567833680482201*^9, 
   3.567833688671009*^9}, {3.5678338016994247`*^9, 3.567833814739279*^9}, {
   3.567860173170782*^9, 3.5678601975023746`*^9}, {3.56786238691637*^9, 
   3.567862420507243*^9}, 3.567862465731326*^9, {3.567873336397994*^9, 
   3.5678734017069397`*^9}, {3.56787369948836*^9, 3.567873713640338*^9}, {
   3.56787377793786*^9, 3.567873874052751*^9}, {3.567873918497718*^9, 
   3.567873922333424*^9}, {3.567875588472186*^9, 3.567875589115979*^9}, {
   3.567875982356086*^9, 3.5678760030164337`*^9}, {3.567917966735767*^9, 
   3.567917984874136*^9}, {3.567918076062499*^9, 3.5679180907104273`*^9}}],

Cell[BoxData[
 RowBox[{
  RowBox[{"TransientPlot", "[", 
   RowBox[{
   "data_", ",", "result_", ",", "bias_", ",", "noise_", ",", "fontSize_"}], 
   "]"}], ":=", 
  RowBox[{"Module", "[", "\[IndentingNewLine]", 
   RowBox[{
    RowBox[{"{", 
     RowBox[{
     "sensorPlot", ",", "actionPlot", ",", "sensorRange", ",", "actionRange", 
      ",", "sensorTicks", ",", "actionTicks", ",", "newticks", ",", "xticks", 
      ",", "oldticks", ",", "show", ",", "legend", ",", "legendG", ",", 
      "ColorBox"}], "}"}], ",", "\[IndentingNewLine]", "\[IndentingNewLine]", 
    
    RowBox[{
     RowBox[{"sensorPlot", "=", "\[IndentingNewLine]", 
      RowBox[{"ListLinePlot", "[", "\[IndentingNewLine]", 
       RowBox[{
        RowBox[{"{", 
         RowBox[{
          RowBox[{"data", "[", 
           RowBox[{"[", "1", "]"}], "]"}], "[", 
          RowBox[{"[", 
           RowBox[{"1", ";;", "500"}], "]"}], "]"}], "}"}], ",", 
        "\[IndentingNewLine]", 
        RowBox[{"AspectRatio", "\[Rule]", 
         RowBox[{"1", "/", "4"}]}], ",", 
        RowBox[{"PlotRange", "\[Rule]", 
         RowBox[{"{", 
          RowBox[{"0", ",", "9"}], "}"}]}], ",", 
        RowBox[{"PlotStyle", "\[Rule]", 
         RowBox[{"{", "Thick", "}"}]}], ",", 
        RowBox[{"ImageSize", "\[Rule]", "700"}]}], "]"}]}], ";", 
     "\[IndentingNewLine]", "\[IndentingNewLine]", 
     RowBox[{"actionPlot", "=", "\[IndentingNewLine]", 
      RowBox[{"ListLinePlot", "[", "\[IndentingNewLine]", 
       RowBox[{
        RowBox[{"{", 
         RowBox[{
          RowBox[{"data", "[", 
           RowBox[{"[", "2", "]"}], "]"}], "[", 
          RowBox[{"[", 
           RowBox[{"1", ";;", "500"}], "]"}], "]"}], "}"}], ",", 
        "\[IndentingNewLine]", 
        RowBox[{"AspectRatio", "\[Rule]", 
         RowBox[{"1", "/", "4"}]}], ",", 
        RowBox[{"PlotRange", "\[Rule]", 
         RowBox[{"{", 
          RowBox[{
           RowBox[{"-", "1"}], ",", "1"}], "}"}]}], ",", 
        RowBox[{"PlotStyle", "\[Rule]", 
         RowBox[{"{", 
          RowBox[{"Thick", ",", 
           RowBox[{"Opacity", "[", "0.75", "]"}], ",", 
           RowBox[{
            RowBox[{"ColorData", "[", "1", "]"}], "[", "2", "]"}]}], "}"}]}], 
        ",", 
        RowBox[{"ImageSize", "\[Rule]", "700"}]}], "]"}]}], ";", 
     "\[IndentingNewLine]", "\[IndentingNewLine]", 
     RowBox[{"sensorRange", "=", 
      RowBox[{"(", 
       RowBox[{"{", 
        RowBox[{"0", ",", "9"}], "}"}], ")"}]}], ";", "\[IndentingNewLine]", 
     RowBox[{"actionRange", "=", 
      RowBox[{"(", 
       RowBox[{"{", 
        RowBox[{
         RowBox[{"-", "1"}], ",", "1"}], "}"}], ")"}]}], ";", 
     "\[IndentingNewLine]", 
     RowBox[{"newticks", "=", 
      RowBox[{"{", 
       RowBox[{
        RowBox[{"{", 
         RowBox[{"0", ",", "\"\<-1\>\""}], "}"}], ",", 
        RowBox[{"{", 
         RowBox[{"9", ",", "\"\<1\>\""}], "}"}], ",", 
        RowBox[{"{", 
         RowBox[{"4.5", ",", "0"}], "}"}], ",", 
        RowBox[{"{", 
         RowBox[{"2.25", ",", 
          RowBox[{"-", "0.5"}]}], "}"}], ",", 
        RowBox[{"{", 
         RowBox[{"6.75", ",", "0.5"}], "}"}]}], "}"}]}], ";", 
     "\[IndentingNewLine]", 
     RowBox[{"xticks", "=", 
      RowBox[{"{", 
       RowBox[{
        RowBox[{"{", 
         RowBox[{"0", ",", "\"\<0s\>\""}], "}"}], ",", 
        RowBox[{"{", 
         RowBox[{"100", ",", "\"\<1s\>\""}], "}"}], ",", 
        RowBox[{"{", 
         RowBox[{"200", ",", "\"\<2s\>\""}], "}"}], ",", 
        RowBox[{"{", 
         RowBox[{"300", ",", "\"\<3s\>\""}], "}"}], ",", 
        RowBox[{"{", 
         RowBox[{"400", ",", "\"\<4s\>\""}], "}"}], ",", 
        RowBox[{"{", 
         RowBox[{"500", ",", "\"\<5s\>\""}], "}"}]}], "}"}]}], ";", 
     "\[IndentingNewLine]", "\[IndentingNewLine]", 
     RowBox[{
      RowBox[{"ColorBox", "[", "i_", "]"}], ":=", 
      RowBox[{"Graphics", "[", 
       RowBox[{
        RowBox[{"{", 
         RowBox[{
          RowBox[{
           RowBox[{"ColorData", "[", "1", "]"}], "[", "i", "]"}], ",", 
          RowBox[{"AbsoluteThickness", "[", "3", "]"}], ",", 
          RowBox[{"Line", "[", 
           RowBox[{"{", 
            RowBox[{
             RowBox[{"{", 
              RowBox[{"0", ",", "0"}], "}"}], ",", 
             RowBox[{"{", 
              RowBox[{"1", ",", "0"}], "}"}]}], "}"}], "]"}]}], "}"}], ",", 
        RowBox[{"ImageSize", "\[Rule]", "20"}]}], "]"}]}], ";", 
     "\[IndentingNewLine]", "\[IndentingNewLine]", 
     RowBox[{"legend", "=", 
      RowBox[{"Grid", "[", "\[IndentingNewLine]", 
       RowBox[{
        RowBox[{"{", "\[IndentingNewLine]", 
         RowBox[{
          RowBox[{"{", 
           RowBox[{
            RowBox[{"ColorBox", "[", "2", "]"}], ",", 
            RowBox[{"Style", "[", 
             RowBox[{"\"\<f(t)\>\"", ",", 
              RowBox[{"fontSize", "+", "2"}]}], "]"}]}], "}"}], ",", 
          "\[IndentingNewLine]", 
          RowBox[{"{", 
           RowBox[{
            RowBox[{"ColorBox", "[", "1", "]"}], ",", 
            RowBox[{"Style", "[", 
             RowBox[{
             "\"\<\!\(\*OverscriptBox[\(\[Theta]\), \(.\)]\)(t)\>\"", ",", 
              RowBox[{"fontSize", "+", "2"}]}], "]"}]}], "}"}]}], 
         "\[IndentingNewLine]", "}"}], ",", "\[IndentingNewLine]", 
        RowBox[{"ItemSize", "\[Rule]", "Full"}], ",", "\[IndentingNewLine]", 
        RowBox[{"Alignment", "\[Rule]", 
         RowBox[{"{", 
          RowBox[{"Left", ",", "Center"}], "}"}]}]}], "\[IndentingNewLine]", 
       "]"}]}], ";", "\[IndentingNewLine]", "\[IndentingNewLine]", 
     RowBox[{"show", "=", 
      RowBox[{"Show", "[", "\[IndentingNewLine]", 
       RowBox[{
        RowBox[{"{", 
         RowBox[{
          RowBox[{"actionPlot", "/.", 
           RowBox[{
            RowBox[{"Graphics", "[", 
             RowBox[{"graf_", ",", "s___"}], "]"}], "\[RuleDelayed]", 
            RowBox[{"Graphics", "[", 
             RowBox[{
              RowBox[{"GeometricTransformation", "[", 
               RowBox[{"graf", ",", 
                RowBox[{"RescalingTransform", "[", 
                 RowBox[{
                  RowBox[{"{", 
                   RowBox[{
                    RowBox[{"{", 
                    RowBox[{"0", ",", "500"}], "}"}], ",", "actionRange"}], 
                   "}"}], ",", 
                  RowBox[{"{", 
                   RowBox[{
                    RowBox[{"{", 
                    RowBox[{"0", ",", "500"}], "}"}], ",", "sensorRange"}], 
                   "}"}]}], "]"}]}], "]"}], ",", "s"}], "]"}]}]}], ",", 
          "\[IndentingNewLine]", "sensorPlot", ",", "\[IndentingNewLine]", 
          RowBox[{"Graphics", "[", 
           RowBox[{
            RowBox[{"Text", "[", 
             RowBox[{
              RowBox[{"Style", "[", 
               RowBox[{
                RowBox[{"\"\<\[Eta]=\>\"", "<>", 
                 RowBox[{"ToString", "[", "noise", "]"}], "<>", 
                 "\"\< \[Beta]=\>\"", "<>", 
                 RowBox[{"ToString", "[", "bias", "]"}]}], ",", 
                RowBox[{"fontSize", "+", "6"}]}], "]"}], ",", 
              RowBox[{"{", 
               RowBox[{"5", ",", "1.25"}], "}"}], ",", 
              RowBox[{"{", 
               RowBox[{
                RowBox[{"-", "1"}], ",", "0"}], "}"}]}], "]"}], ",", 
            RowBox[{"ImageSize", "\[Rule]", "710"}], ",", 
            RowBox[{"AspectRatio", "\[Rule]", 
             RowBox[{"1", "/", "4"}]}]}], "]"}], ",", "\[IndentingNewLine]", 
          RowBox[{"Graphics", "[", 
           RowBox[{
            RowBox[{"Text", "[", 
             RowBox[{
              RowBox[{"Style", "[", 
               RowBox[{"\"\<t\>\"", ",", "24"}], "]"}], ",", 
              RowBox[{"{", 
               RowBox[{"500", ",", "0.75"}], "}"}], ",", 
              RowBox[{"{", 
               RowBox[{
                RowBox[{"-", "1"}], ",", "0"}], "}"}]}], "]"}], ",", 
            RowBox[{"ImageSize", "\[Rule]", "710"}], ",", 
            RowBox[{"AspectRatio", "\[Rule]", 
             RowBox[{"1", "/", "4"}]}]}], "]"}]}], "\[IndentingNewLine]", 
         "}"}], "\[IndentingNewLine]", ",", "\[IndentingNewLine]", 
        RowBox[{"PlotRange", "\[Rule]", 
         RowBox[{"{", 
          RowBox[{"0", ",", "9"}], "}"}]}], ",", "\[IndentingNewLine]", 
        RowBox[{"Axes", "\[Rule]", "True"}], ",", "\[IndentingNewLine]", 
        RowBox[{"Epilog", "\[Rule]", 
         RowBox[{"{", 
          RowBox[{"Inset", "[", 
           RowBox[{"legend", ",", 
            RowBox[{"{", 
             RowBox[{"20", ",", "6"}], "}"}]}], "]"}], "}"}]}], ",", 
        "\[IndentingNewLine]", 
        RowBox[{"Frame", "\[Rule]", 
         RowBox[{"{", 
          RowBox[{
           RowBox[{"{", 
            RowBox[{"True", ",", "True"}], "}"}], ",", 
           RowBox[{"{", 
            RowBox[{"True", ",", "False"}], "}"}]}], "}"}]}], ",", 
        "\[IndentingNewLine]", 
        RowBox[{"FrameTicksStyle", "\[Rule]", 
         RowBox[{"Directive", "[", "18", "]"}]}], ",", "\[IndentingNewLine]", 
        
        RowBox[{"FrameLabel", "\[Rule]", 
         RowBox[{"{", 
          RowBox[{
           RowBox[{"{", 
            RowBox[{
             RowBox[{"Style", "[", 
              RowBox[{
              "\"\<\!\(\*OverscriptBox[\(\[Theta]\), \(.\)]\)(t)\>\"", ",", 
               "20"}], "]"}], ",", 
             RowBox[{"Style", "[", 
              RowBox[{"\"\<f(t)\>\"", ",", "20"}], "]"}]}], "}"}], ",", 
           RowBox[{"{", 
            RowBox[{"None", ",", "None"}], "}"}]}], "}"}]}], ",", 
        "\[IndentingNewLine]", 
        RowBox[{"FrameTicks", "\[Rule]", 
         RowBox[{"{", 
          RowBox[{
           RowBox[{"{", 
            RowBox[{"Automatic", ",", "newticks"}], "}"}], ",", 
           RowBox[{"{", 
            RowBox[{"xticks", ",", "None"}], "}"}]}], "}"}]}]}], 
       "\[IndentingNewLine]", "]"}]}], ";", "\[IndentingNewLine]", 
     "\[IndentingNewLine]", 
     RowBox[{"Print", "[", "\[IndentingNewLine]", 
      RowBox[{"Grid", "[", 
       RowBox[{
        RowBox[{"{", "\[IndentingNewLine]", 
         RowBox[{"{", "\[IndentingNewLine]", 
          RowBox[{
           RowBox[{"Style", "[", 
            RowBox[{
            "\"\<\!\(\*SubscriptBox[\(ASOC\), \(A\)]\): \>\"", ",", 
             "fontSize"}], "]"}], ",", 
           RowBox[{"Style", "[", 
            RowBox[{
             RowBox[{"ToString", "[", 
              RowBox[{"Round", "[", 
               RowBox[{
                RowBox[{"result", "[", 
                 RowBox[{"[", "1", "]"}], "]"}], ",", "0.01"}], "]"}], "]"}], 
             ",", "fontSize"}], "]"}], ",", "\[IndentingNewLine]", 
           "\"\<  \>\"", ",", "\[IndentingNewLine]", 
           RowBox[{"Style", "[", 
            RowBox[{
            "\"\<\!\(\*SubscriptBox[\(C\), \(A\)]\): \>\"", ",", "fontSize"}],
             "]"}], ",", 
           RowBox[{"Style", "[", 
            RowBox[{
             RowBox[{"ToString", "[", 
              RowBox[{"Round", "[", 
               RowBox[{
                RowBox[{"result", "[", 
                 RowBox[{"[", "2", "]"}], "]"}], ",", "0.01"}], "]"}], "]"}], 
             ",", "fontSize"}], "]"}], ",", "\[IndentingNewLine]", 
           "\"\<  \>\"", ",", "\[IndentingNewLine]", 
           RowBox[{"Style", "[", 
            RowBox[{
            "\"\<\!\(\*SubscriptBox[\(ASOC\), \(W\)]\): \>\"", ",", 
             "fontSize"}], "]"}], ",", 
           RowBox[{"Style", "[", 
            RowBox[{
             RowBox[{"ToString", "[", 
              RowBox[{"Round", "[", 
               RowBox[{
                RowBox[{"result", "[", 
                 RowBox[{"[", "4", "]"}], "]"}], ",", "0.01"}], "]"}], "]"}], 
             ",", "fontSize"}], "]"}], ",", "\[IndentingNewLine]", 
           "\"\<  \>\"", ",", "\[IndentingNewLine]", 
           RowBox[{"Style", "[", 
            RowBox[{
            "\"\<\!\(\*SubscriptBox[\(C\), \(W\)]\): \>\"", ",", "fontSize"}],
             "]"}], ",", 
           RowBox[{"Style", "[", 
            RowBox[{
             RowBox[{"ToString", "[", 
              RowBox[{"Round", "[", 
               RowBox[{
                RowBox[{"result", "[", 
                 RowBox[{"[", "3", "]"}], "]"}], ",", "0.01"}], "]"}], "]"}], 
             ",", "fontSize"}], "]"}]}], "\[IndentingNewLine]", "}"}], 
         "\[IndentingNewLine]", "}"}], ",", 
        RowBox[{"Alignment", "\[Rule]", "Left"}]}], "]"}], 
      "\[IndentingNewLine]", "]"}], ";", "\[IndentingNewLine]", 
     "\[IndentingNewLine]", 
     RowBox[{"Return", "[", "show", "]"}]}]}], "\[IndentingNewLine]", 
   "]"}]}]], "Input",
 InitializationCell->True,
 CellChangeTimes->CompressedData["
1:eJwdz20w0wEcB/CZy8Oau2WkSA93HqaFlQjRJXo6kVnWDnmYbXkIK0cqp3bX
MTdX1BWdChvhvCii3Hl44eHC7miUQnmo1WZctyJcif7f/4vffe77ffO93x5h
ZqSYSqFQjhAHg39FnZkuMQRNmvNJDyuUkTBgVceDu5gZAsiwKcmEdHaEDIoz
K+SwN7+nBIYw99dBqZNfI6QKJINQKyobhQeqzVgzhFcF3u7QjnHIH9ZzuxOg
rVGdBx8rBXLIVlEUMFnldw+KqGEdsLbAUQ3bru17Bz/LA8dhYh2XNJeXQ58l
XPNJtoKsWk8JVGqCSbXtfRod4a1Otw8wN2NlAvaM9U9CWpOXDn7hn9XDg7/b
F+C5uHUjpOorV+B96ZSpnvC7OMsCPqzResDYsU4veKpZ7Q1/lJqGwqKZ4nC4
VOwogAmiVtJcH5t4OFH8RgK/8VhX4M00Yz6kNaTfhtxAbiG5c37nOnzWbM2e
IwyrLPeF/AaOH+Q0CIPgcUbwSRjBDwuF9illUTCTzbgAN//rTYSBDpRUKKri
XILSmItZsM5gmw2LylZz4VtJkwwuf0pSwOS8rvcwvMIwAVVdnotkL9FnGwgv
s4euQxfZo0KoXf5TAY27NyrhlLCpGkrHU1rh1qmq1/Aow6QDbou0WoMdMTnm
84QK2tctUKV74gjp1FAX6OsUx4N3rLfHQqHcJhHmtwqT4bF5yxGzUkPQjr+b
PkKjvotpiezaaA+j3WUe0MOhJgD+9FPeYBJaiEPyYGp5WhuLMHJxtg9Wd6o1
0MQuaRRGG+WT0JkzTKqkZ8zBeoGzEWqi+yhuhP4FblS4MGBHC35A/O0iJeWm
stOhtWs86dBG4nNYI777Eq5S6vvh3kHuALRs6dbAEyunR6B6KWcKJimGpyGf
2f8ihPCV7dMW+B8RIB4y
  "]]
}, Open  ]],

Cell[CellGroupData[{

Cell["Experiments", "Subsection",
 CellChangeTimes->{{3.564911649598284*^9, 3.564911652932332*^9}}],

Cell[BoxData[
 RowBox[{
  RowBox[{"(*", 
   RowBox[{
    RowBox[{"biasValues", "=", 
     RowBox[{"Table", "[", 
      RowBox[{"i", ",", 
       RowBox[{"{", 
        RowBox[{"i", ",", "0", ",", "2", ",", "0.01"}], "}"}]}], "]"}]}], ";",
     "\[IndentingNewLine]", 
    RowBox[{"noiseValues", "=", 
     RowBox[{"Table", "[", 
      RowBox[{"i", ",", 
       RowBox[{"{", 
        RowBox[{"i", ",", "0", ",", "0.5", ",", "0.025"}], "}"}]}], "]"}]}], 
    ";"}], "*)"}], "\[IndentingNewLine]", "\[IndentingNewLine]", 
  RowBox[{
   RowBox[{
    RowBox[{"biasValues", "=", 
     RowBox[{"Table", "[", 
      RowBox[{"i", ",", 
       RowBox[{"{", 
        RowBox[{"i", ",", "0", ",", "2", ",", "0.1"}], "}"}]}], "]"}]}], 
    ";"}], "\[IndentingNewLine]", 
   RowBox[{
    RowBox[{"noiseValues", "=", 
     RowBox[{"Table", "[", 
      RowBox[{"i", ",", 
       RowBox[{"{", 
        RowBox[{"i", ",", "0", ",", "0.5", ",", "0.25"}], "}"}]}], "]"}]}], 
    ";"}], "\[IndentingNewLine]", "\[IndentingNewLine]", 
   RowBox[{
    RowBox[{"bins", "=", "30"}], ";"}], "\[IndentingNewLine]", 
   RowBox[{
    RowBox[{"n", "=", "10"}], ";"}], "\[IndentingNewLine]", 
   RowBox[{
    RowBox[{"max", "=", "8"}], ";", "k"}], "\[IndentingNewLine]", 
   "\[IndentingNewLine]", 
   RowBox[{
    RowBox[{"eta", "=", "0"}], ";"}], "\[IndentingNewLine]", 
   RowBox[{
    RowBox[{"start", "=", 
     RowBox[{"TimeUsed", "[", "]"}]}], ";"}], "\[IndentingNewLine]", 
   "\[IndentingNewLine]", 
   RowBox[{
    RowBox[{"combined", "=", 
     RowBox[{"Flatten", "[", 
      RowBox[{
       RowBox[{"Outer", "[", 
        RowBox[{
         RowBox[{
          RowBox[{"{", 
           RowBox[{"#1", ",", "#2"}], "}"}], "&"}], ",", "biasValues", ",", 
         "noiseValues"}], "]"}], ",", "1"}], "]"}]}], ";"}], "\n", 
   "\[IndentingNewLine]", 
   RowBox[{
    RowBox[{"nrOfAllCombined", "=", 
     RowBox[{"Length", "[", "combined", "]"}]}], ";"}], "\[IndentingNewLine]", 
   RowBox[{
    RowBox[{"Clear", "[", "g", "]"}], ";"}], "\n", 
   RowBox[{
    RowBox[{"Clear", "[", "d", "]"}], ";"}], "\[IndentingNewLine]", 
   RowBox[{
    RowBox[{"Clear", "[", "pendulumData", "]"}], ";"}], "\[IndentingNewLine]", 
   RowBox[{
    RowBox[{"j", "=", "1"}], ";"}], "\[IndentingNewLine]", 
   RowBox[{
    RowBox[{"d", "=", 
     RowBox[{"{", "}"}]}], ";"}], "\[IndentingNewLine]", 
   "\[IndentingNewLine]", 
   RowBox[{
    RowBox[{"current", "=", 
     RowBox[{"TimeUsed", "[", "]"}]}], ";"}], "\[IndentingNewLine]", 
   "\[IndentingNewLine]", 
   RowBox[{
    RowBox[{
     RowBox[{"numberFormat", "[", "i_Integer", "]"}], ":=", 
     RowBox[{"IntegerString", "[", 
      RowBox[{"i", ",", "10", ",", "2"}], "]"}]}], ";"}], 
   "\[IndentingNewLine]", "\[IndentingNewLine]", 
   RowBox[{
    RowBox[{"Print", "[", 
     RowBox[{
      RowBox[{"ProgressIndicator", "[", 
       RowBox[{"Dynamic", "[", 
        RowBox[{"j", "/", "nrOfAllCombined"}], "]"}], "]"}], ",", 
      "\"\<  \>\"", ",", "\[IndentingNewLine]", 
      RowBox[{"Dynamic", "[", "j", "]"}], ",", "\"\</\>\"", ",", 
      "nrOfAllCombined", ",", "\"\< \>\"", ",", "\[IndentingNewLine]", 
      RowBox[{"Dynamic", "[", 
       RowBox[{"numberFormat", "[", 
        RowBox[{"Floor", "[", 
         RowBox[{"eta", "/", "3600"}], "]"}], "]"}], "]"}], ",", "\"\<h:\>\"",
       ",", "\[IndentingNewLine]", 
      RowBox[{"Dynamic", "[", 
       RowBox[{"numberFormat", "[", 
        RowBox[{
         RowBox[{"Floor", "[", 
          RowBox[{"eta", "/", "60"}], "]"}], "-", 
         RowBox[{
          RowBox[{"Floor", "[", 
           RowBox[{"eta", "/", "3600"}], "]"}], "*", "60"}]}], "]"}], "]"}], 
      ",", "\"\<m:\>\"", ",", "\[IndentingNewLine]", 
      RowBox[{"Dynamic", "[", 
       RowBox[{"numberFormat", "[", 
        RowBox[{"Round", "[", 
         RowBox[{"Mod", "[", 
          RowBox[{"eta", ",", "60"}], "]"}], "]"}], "]"}], "]"}], ",", 
      "\"\<s\>\""}], "\[IndentingNewLine]", "]"}], ";"}], 
   "\[IndentingNewLine]", "\[IndentingNewLine]", 
   RowBox[{
    RowBox[{"pendulumData", "=", 
     RowBox[{"{", "}"}]}], ";"}], "\[IndentingNewLine]", 
   "\[IndentingNewLine]", 
   RowBox[{"f", "=", 
    RowBox[{"OpenWrite", "[", "]"}]}], "\[IndentingNewLine]", 
   RowBox[{
    RowBox[{"g", "=", 
     RowBox[{
      RowBox[{"(", 
       RowBox[{
        RowBox[{"d", "=", 
         RowBox[{"Flatten", "[", 
          RowBox[{"{", 
           RowBox[{
            RowBox[{"#1", "[", 
             RowBox[{"[", "1", "]"}], "]"}], ",", 
            RowBox[{"#1", "[", 
             RowBox[{"[", "2", "]"}], "]"}], ",", 
            RowBox[{"AvgExp", "[", 
             RowBox[{"n", ",", 
              RowBox[{"#1", "[", 
               RowBox[{"[", "1", "]"}], "]"}], ",", 
              RowBox[{"#1", "[", 
               RowBox[{"[", "2", "]"}], "]"}], ",", "bins", ",", "max"}], 
             "]"}]}], "}"}], "]"}]}], ";", "\[IndentingNewLine]", 
        RowBox[{"pendulumData", "=", 
         RowBox[{"Append", "[", 
          RowBox[{"pendulumData", ",", "d"}], "]"}]}], ";", 
        "\[IndentingNewLine]", 
        RowBox[{"WriteString", "[", 
         RowBox[{"f", ",", 
          RowBox[{
           RowBox[{"StringJoin", "[", 
            RowBox[{"Riffle", "[", 
             RowBox[{
              RowBox[{"ToString", "/@", "d"}], ",", "\"\< \>\""}], "]"}], 
            "]"}], "<>", "\"\<\\n\>\""}]}], "]"}], ";", "\[IndentingNewLine]", 
        RowBox[{"current", "=", 
         RowBox[{"TimeUsed", "[", "]"}]}], ";", "\[IndentingNewLine]", 
        RowBox[{"j", "=", 
         RowBox[{"#2", "[", 
          RowBox[{"[", "1", "]"}], "]"}]}], ";", "\[IndentingNewLine]", 
        RowBox[{"eta", "=", 
         RowBox[{
          RowBox[{
           RowBox[{"(", 
            RowBox[{"current", "-", "start"}], ")"}], "/", "j"}], "*", 
          RowBox[{"(", 
           RowBox[{"nrOfAllCombined", "-", "j"}], ")"}]}]}], ";"}], 
       "\[IndentingNewLine]", ")"}], "&"}]}], ";"}], "\[IndentingNewLine]", 
   RowBox[{"(*", 
    RowBox[{
     RowBox[{"Close", "[", "f", "]"}], ";"}], "*)"}], "\n", 
   RowBox[{"(*", 
    RowBox[{
     RowBox[{"r", "=", 
      RowBox[{"Block", "[", 
       RowBox[{
        RowBox[{"{", 
         RowBox[{"j", "=", "0"}], "}"}], ",", 
        RowBox[{"Monitor", "[", 
         RowBox[{
          RowBox[{"MapIndexed", "[", 
           RowBox[{"g", ",", "combined"}], "]"}], ",", 
          RowBox[{"j", ";"}]}], "]"}]}], "]"}]}], ";"}], "*)"}], 
   "\[IndentingNewLine]", 
   RowBox[{
    RowBox[{"MapIndexed", "[", 
     RowBox[{"g", ",", "combined"}], "]"}], ";"}]}]}]], "Input",
 CellChangeTimes->{{3.564907050656556*^9, 3.564907077406981*^9}, {
   3.564907914294038*^9, 3.564907915580661*^9}, {3.56490833814098*^9, 
   3.564908338571045*^9}, {3.5649083808441668`*^9, 3.564908387106063*^9}, {
   3.5649084182433968`*^9, 3.564908423881977*^9}, {3.564911489304021*^9, 
   3.56491150804688*^9}, {3.564911591175148*^9, 3.5649115913419943`*^9}, {
   3.5649117046755447`*^9, 3.5649117919226837`*^9}, {3.564911985133994*^9, 
   3.564912001405067*^9}, {3.5649120521728773`*^9, 3.5649121005310793`*^9}, {
   3.5649122398558817`*^9, 3.564912306485183*^9}, {3.564912393764657*^9, 
   3.564912399746881*^9}, {3.564912494330566*^9, 3.564912515620174*^9}, {
   3.5649125468076468`*^9, 3.564912611935111*^9}, {3.5649126778709517`*^9, 
   3.564912701021843*^9}, {3.564912953193514*^9, 3.564912963359921*^9}, {
   3.5649130416702757`*^9, 3.564913064197422*^9}, {3.564914732745276*^9, 
   3.56491475732303*^9}, {3.56491480345015*^9, 3.564914804786072*^9}, {
   3.564915231846143*^9, 3.5649152323978367`*^9}, {3.5649154183965693`*^9, 
   3.5649154186841583`*^9}, {3.5649154829234333`*^9, 3.564915494560349*^9}, {
   3.564915547762108*^9, 3.564915651038644*^9}, {3.5649157079908524`*^9, 
   3.564915710517267*^9}, {3.5649293067805758`*^9, 3.564929373443959*^9}, {
   3.564929420532854*^9, 3.564929533959058*^9}, {3.564929566509418*^9, 
   3.564929567645226*^9}, {3.5649295983771152`*^9, 3.5649296436868687`*^9}, {
   3.5649296762279663`*^9, 3.564929714672697*^9}, {3.564929818448344*^9, 
   3.5649298672053022`*^9}, {3.564930142432266*^9, 3.564930162072118*^9}, {
   3.564930209090411*^9, 3.564930211143979*^9}, 3.564930250790056*^9, {
   3.5649302927403183`*^9, 3.564930292834258*^9}, {3.564930335468783*^9, 
   3.564930338099659*^9}, {3.564930374522277*^9, 3.5649304009196444`*^9}, {
   3.5649304476442823`*^9, 3.5649304808139343`*^9}, {3.5649305162023497`*^9, 
   3.5649305179840193`*^9}, {3.564930580068242*^9, 3.564930622461205*^9}, {
   3.564930675588421*^9, 3.564930745655085*^9}, {3.564930808444528*^9, 
   3.564930863314384*^9}, {3.5649309006989737`*^9, 3.564930926968773*^9}, {
   3.564931058567072*^9, 3.5649312933015223`*^9}, {3.5649313396295443`*^9, 
   3.5649313399423637`*^9}, {3.564931371559682*^9, 3.564931372096086*^9}, {
   3.5649314925832644`*^9, 3.5649316047511673`*^9}, {3.5649316658632193`*^9, 
   3.564931676205411*^9}, {3.5649317435400457`*^9, 3.564931744220813*^9}, {
   3.564931905760565*^9, 3.5649319282864447`*^9}, {3.564932023270916*^9, 
   3.564932035892041*^9}, {3.564932252128817*^9, 3.564932256533095*^9}, {
   3.564932454378203*^9, 3.5649327487428913`*^9}, {3.5649353605879803`*^9, 
   3.5649354475886497`*^9}, {3.564935644770775*^9, 3.564935669490939*^9}, {
   3.56493572894279*^9, 3.564935800065753*^9}, {3.564935945250596*^9, 
   3.564935947407415*^9}, {3.564937948551136*^9, 3.5649379516642437`*^9}, {
   3.564938323554001*^9, 3.564938330265587*^9}, {3.564938403400742*^9, 
   3.564938417334807*^9}, {3.564980940522882*^9, 3.564980940625966*^9}, {
   3.564981020020054*^9, 3.564981021544277*^9}, {3.5649811112252283`*^9, 
   3.564981112753087*^9}, {3.564981573593429*^9, 3.564981574985497*^9}, {
   3.564982250937248*^9, 3.564982254438064*^9}, {3.564982483500374*^9, 
   3.564982512259062*^9}, {3.564982707048287*^9, 3.5649827093454323`*^9}, {
   3.564982867096903*^9, 3.564982870024315*^9}, {3.5650945383272543`*^9, 
   3.5650945516664257`*^9}, {3.5650946107896442`*^9, 3.565094626444377*^9}, {
   3.565095678857072*^9, 3.5650956810569057`*^9}, {3.565095736521237*^9, 
   3.565095738327807*^9}, {3.565097154812402*^9, 3.565097156324533*^9}, {
   3.565097389080809*^9, 3.5650973906396437`*^9}, {3.565703575007085*^9, 
   3.565703581867916*^9}, {3.565703635789522*^9, 3.565703652407702*^9}, {
   3.5657037233030367`*^9, 3.5657037262043877`*^9}, {3.565720648232415*^9, 
   3.565720651538095*^9}, {3.5657208675728607`*^9, 3.5657208685402117`*^9}, {
   3.565766048147249*^9, 3.565766052927433*^9}, {3.565766560729732*^9, 
   3.56576657319697*^9}, {3.5657667955461407`*^9, 3.5657667971849833`*^9}, {
   3.5657668306188793`*^9, 3.565766868837463*^9}, 3.565766901795527*^9, {
   3.565767587551648*^9, 3.565767885981256*^9}, {3.5657679216871347`*^9, 
   3.565767929358719*^9}, {3.565768056744022*^9, 3.565768056907267*^9}, {
   3.565768119248598*^9, 3.5657681462937193`*^9}, {3.565773691860612*^9, 
   3.5657737183095427`*^9}, {3.565773759456841*^9, 3.56577376086639*^9}, {
   3.565773823396681*^9, 3.5657738246276617`*^9}, {3.565773865964945*^9, 
   3.565773881557015*^9}, {3.565773928459597*^9, 3.565773951383093*^9}, {
   3.5657739898086576`*^9, 3.565773989917419*^9}, 3.56812107319923*^9}]
}, Open  ]],

Cell[CellGroupData[{

Cell["Data generated with 30 Bins", "Subsection",
 CellChangeTimes->{{3.56498039244897*^9, 3.564980396267026*^9}, {
  3.565601315880982*^9, 3.565601317246344*^9}, {3.565703533794767*^9, 
  3.565703557148532*^9}, {3.565768128800009*^9, 3.565768129902382*^9}, {
  3.5657738519926033`*^9, 3.5657738545682793`*^9}, {3.566541493061405*^9, 
  3.566541493108827*^9}}],

Cell[BoxData[
 RowBox[{
  RowBox[{"pendulumData", "=", 
   RowBox[{"{", 
    RowBox[{
     RowBox[{"{", 
      RowBox[{
      "0.`", ",", "0.`", ",", "0.958187`", ",", "0.991731`", ",", 
       "0.0135443`", ",", "0.00905139`"}], "}"}], ",", 
     RowBox[{"{", 
      RowBox[{
      "0.`", ",", "0.025`", ",", "0.984918`", ",", "0.983599`", ",", 
       "0.0955539`", ",", "0.0688992`"}], "}"}], ",", 
     RowBox[{"{", 
      RowBox[{
      "0.`", ",", "0.05`", ",", "0.986146`", ",", "0.975595`", ",", 
       "0.195447`", ",", "0.161893`"}], "}"}], ",", 
     RowBox[{"{", 
      RowBox[{
      "0.`", ",", "0.075`", ",", "0.980727`", ",", "0.969534`", ",", 
       "0.254674`", ",", "0.214305`"}], "}"}], ",", 
     RowBox[{"{", 
      RowBox[{
      "0.`", ",", "0.1`", ",", "0.974508`", ",", "0.967505`", ",", 
       "0.301632`", ",", "0.254965`"}], "}"}], ",", 
     RowBox[{"{", 
      RowBox[{
      "0.`", ",", "0.125`", ",", "0.968943`", ",", "0.966565`", ",", 
       "0.334403`", ",", "0.281795`"}], "}"}], ",", 
     RowBox[{"{", 
      RowBox[{
      "0.`", ",", "0.15`", ",", "0.963049`", ",", "0.968576`", ",", 
       "0.364488`", ",", "0.306935`"}], "}"}], ",", 
     RowBox[{"{", 
      RowBox[{
      "0.`", ",", "0.175`", ",", "0.956965`", ",", "0.971469`", ",", 
       "0.389306`", ",", "0.325923`"}], "}"}], ",", 
     RowBox[{"{", 
      RowBox[{
      "0.`", ",", "0.2`", ",", "0.952213`", ",", "0.976247`", ",", 
       "0.411514`", ",", "0.345438`"}], "}"}], ",", 
     RowBox[{"{", 
      RowBox[{
      "0.`", ",", "0.225`", ",", "0.947375`", ",", "0.980833`", ",", 
       "0.429674`", ",", "0.359761`"}], "}"}], ",", 
     RowBox[{"{", 
      RowBox[{
      "0.`", ",", "0.25`", ",", "0.943043`", ",", "0.984863`", ",", 
       "0.448306`", ",", "0.374166`"}], "}"}], ",", 
     RowBox[{"{", 
      RowBox[{
      "0.`", ",", "0.275`", ",", "0.940474`", ",", "0.988994`", ",", 
       "0.460467`", ",", "0.384148`"}], "}"}], ",", 
     RowBox[{"{", 
      RowBox[{
      "0.`", ",", "0.3`", ",", "0.936106`", ",", "0.991348`", ",", 
       "0.474821`", ",", "0.394517`"}], "}"}], ",", 
     RowBox[{"{", 
      RowBox[{
      "0.`", ",", "0.325`", ",", "0.932089`", ",", "0.991801`", ",", 
       "0.488792`", ",", "0.40488`"}], "}"}], ",", 
     RowBox[{"{", 
      RowBox[{
      "0.`", ",", "0.35`", ",", "0.929122`", ",", "0.991274`", ",", 
       "0.501506`", ",", "0.414905`"}], "}"}], ",", 
     RowBox[{"{", 
      RowBox[{
      "0.`", ",", "0.375`", ",", "0.927372`", ",", "0.990789`", ",", 
       "0.511377`", ",", "0.42382`"}], "}"}], ",", 
     RowBox[{"{", 
      RowBox[{
      "0.`", ",", "0.4`", ",", "0.925269`", ",", "0.990027`", ",", 
       "0.519669`", ",", "0.43057`"}], "}"}], ",", 
     RowBox[{"{", 
      RowBox[{
      "0.`", ",", "0.425`", ",", "0.923803`", ",", "0.989842`", ",", 
       "0.529142`", ",", "0.44023`"}], "}"}], ",", 
     RowBox[{"{", 
      RowBox[{
      "0.`", ",", "0.45`", ",", "0.92171`", ",", "0.988782`", ",", 
       "0.537791`", ",", "0.447334`"}], "}"}], ",", 
     RowBox[{"{", 
      RowBox[{
      "0.`", ",", "0.475`", ",", "0.920157`", ",", "0.988243`", ",", 
       "0.542106`", ",", "0.45121`"}], "}"}], ",", 
     RowBox[{"{", 
      RowBox[{
      "0.`", ",", "0.5`", ",", "0.919375`", ",", "0.988058`", ",", 
       "0.547864`", ",", "0.457126`"}], "}"}], ",", 
     RowBox[{"{", 
      RowBox[{
      "0.01`", ",", "0.`", ",", "0.958185`", ",", "0.989368`", ",", 
       "0.0220605`", ",", "0.0130253`"}], "}"}], ",", 
     RowBox[{"{", 
      RowBox[{
      "0.01`", ",", "0.025`", ",", "0.984433`", ",", "0.983818`", ",", 
       "0.0975997`", ",", "0.0713543`"}], "}"}], ",", 
     RowBox[{"{", 
      RowBox[{
      "0.01`", ",", "0.05`", ",", "0.985772`", ",", "0.976267`", ",", 
       "0.195679`", ",", "0.161948`"}], "}"}], ",", 
     RowBox[{"{", 
      RowBox[{
      "0.01`", ",", "0.075`", ",", "0.980641`", ",", "0.970182`", ",", 
       "0.255191`", ",", "0.214799`"}], "}"}], ",", 
     RowBox[{"{", 
      RowBox[{
      "0.01`", ",", "0.1`", ",", "0.974903`", ",", "0.968416`", ",", 
       "0.301223`", ",", "0.254701`"}], "}"}], ",", 
     RowBox[{"{", 
      RowBox[{
      "0.01`", ",", "0.125`", ",", "0.96912`", ",", "0.967167`", ",", 
       "0.335359`", ",", "0.283152`"}], "}"}], ",", 
     RowBox[{"{", 
      RowBox[{
      "0.01`", ",", "0.15`", ",", "0.963429`", ",", "0.968629`", ",", 
       "0.362945`", ",", "0.305892`"}], "}"}], ",", 
     RowBox[{"{", 
      RowBox[{
      "0.01`", ",", "0.175`", ",", "0.957943`", ",", "0.971826`", ",", 
       "0.3899`", ",", "0.327992`"}], "}"}], ",", 
     RowBox[{"{", 
      RowBox[{
      "0.01`", ",", "0.2`", ",", "0.951919`", ",", "0.975681`", ",", 
       "0.409629`", ",", "0.343629`"}], "}"}], ",", 
     RowBox[{"{", 
      RowBox[{
      "0.01`", ",", "0.225`", ",", "0.947608`", ",", "0.980121`", ",", 
       "0.428536`", ",", "0.359099`"}], "}"}], ",", 
     RowBox[{"{", 
      RowBox[{
      "0.01`", ",", "0.25`", ",", "0.943336`", ",", "0.984549`", ",", 
       "0.441886`", ",", "0.368543`"}], "}"}], ",", 
     RowBox[{"{", 
      RowBox[{
      "0.01`", ",", "0.275`", ",", "0.9395`", ",", "0.988631`", ",", 
       "0.461596`", ",", "0.385069`"}], "}"}], ",", 
     RowBox[{"{", 
      RowBox[{
      "0.01`", ",", "0.3`", ",", "0.935044`", ",", "0.99097`", ",", 
       "0.472662`", ",", "0.392016`"}], "}"}], ",", 
     RowBox[{"{", 
      RowBox[{
      "0.01`", ",", "0.325`", ",", "0.93371`", ",", "0.992526`", ",", 
       "0.485888`", ",", "0.403678`"}], "}"}], ",", 
     RowBox[{"{", 
      RowBox[{
      "0.01`", ",", "0.35`", ",", "0.929408`", ",", "0.991104`", ",", 
       "0.497214`", ",", "0.411223`"}], "}"}], ",", 
     RowBox[{"{", 
      RowBox[{
      "0.01`", ",", "0.375`", ",", "0.927524`", ",", "0.990757`", ",", 
       "0.507463`", ",", "0.420108`"}], "}"}], ",", 
     RowBox[{"{", 
      RowBox[{
      "0.01`", ",", "0.4`", ",", "0.925313`", ",", "0.989701`", ",", 
       "0.51871`", ",", "0.430112`"}], "}"}], ",", 
     RowBox[{"{", 
      RowBox[{
      "0.01`", ",", "0.425`", ",", "0.923148`", ",", "0.989701`", ",", 
       "0.52702`", ",", "0.438001`"}], "}"}], ",", 
     RowBox[{"{", 
      RowBox[{
      "0.01`", ",", "0.45`", ",", "0.921529`", ",", "0.988533`", ",", 
       "0.53603`", ",", "0.445447`"}], "}"}], ",", 
     RowBox[{"{", 
      RowBox[{
      "0.01`", ",", "0.475`", ",", "0.919981`", ",", "0.987763`", ",", 
       "0.539528`", ",", "0.448932`"}], "}"}], ",", 
     RowBox[{"{", 
      RowBox[{
      "0.01`", ",", "0.5`", ",", "0.919358`", ",", "0.987965`", ",", 
       "0.547936`", ",", "0.456813`"}], "}"}], ",", 
     RowBox[{"{", 
      RowBox[{
      "0.02`", ",", "0.`", ",", "0.959041`", ",", "0.990637`", ",", 
       "0.0237739`", ",", "0.0170181`"}], "}"}], ",", 
     RowBox[{"{", 
      RowBox[{
      "0.02`", ",", "0.025`", ",", "0.984541`", ",", "0.984332`", ",", 
       "0.0974581`", ",", "0.0708738`"}], "}"}], ",", 
     RowBox[{"{", 
      RowBox[{
      "0.02`", ",", "0.05`", ",", "0.986914`", ",", "0.976704`", ",", 
       "0.193785`", ",", "0.161308`"}], "}"}], ",", 
     RowBox[{"{", 
      RowBox[{
      "0.02`", ",", "0.075`", ",", "0.980703`", ",", "0.970717`", ",", 
       "0.256418`", ",", "0.216306`"}], "}"}], ",", 
     RowBox[{"{", 
      RowBox[{
      "0.02`", ",", "0.1`", ",", "0.975521`", ",", "0.968741`", ",", 
       "0.300973`", ",", "0.25494`"}], "}"}], ",", 
     RowBox[{"{", 
      RowBox[{
      "0.02`", ",", "0.125`", ",", "0.969337`", ",", "0.966797`", ",", 
       "0.334278`", ",", "0.282235`"}], "}"}], ",", 
     RowBox[{"{", 
      RowBox[{
      "0.02`", ",", "0.15`", ",", "0.963951`", ",", "0.968787`", ",", 
       "0.362051`", ",", "0.305354`"}], "}"}], ",", 
     RowBox[{"{", 
      RowBox[{
      "0.02`", ",", "0.175`", ",", "0.95824`", ",", "0.971516`", ",", 
       "0.387041`", ",", "0.325407`"}], "}"}], ",", 
     RowBox[{"{", 
      RowBox[{
      "0.02`", ",", "0.2`", ",", "0.953245`", ",", "0.975602`", ",", 
       "0.408066`", ",", "0.342768`"}], "}"}], ",", 
     RowBox[{"{", 
      RowBox[{
      "0.02`", ",", "0.225`", ",", "0.947769`", ",", "0.979542`", ",", 
       "0.429171`", ",", "0.360553`"}], "}"}], ",", 
     RowBox[{"{", 
      RowBox[{
      "0.02`", ",", "0.25`", ",", "0.94382`", ",", "0.9842`", ",", 
       "0.443841`", ",", "0.371162`"}], "}"}], ",", 
     RowBox[{"{", 
      RowBox[{
      "0.02`", ",", "0.275`", ",", "0.94041`", ",", "0.98859`", ",", 
       "0.457962`", ",", "0.382245`"}], "}"}], ",", 
     RowBox[{"{", 
      RowBox[{
      "0.02`", ",", "0.3`", ",", "0.936077`", ",", "0.990469`", ",", 
       "0.473457`", ",", "0.393664`"}], "}"}], ",", 
     RowBox[{"{", 
      RowBox[{
      "0.02`", ",", "0.325`", ",", "0.932615`", ",", "0.99246`", ",", 
       "0.486651`", ",", "0.403268`"}], "}"}], ",", 
     RowBox[{"{", 
      RowBox[{
      "0.02`", ",", "0.35`", ",", "0.930839`", ",", "0.991571`", ",", 
       "0.496866`", ",", "0.412106`"}], "}"}], ",", 
     RowBox[{"{", 
      RowBox[{
      "0.02`", ",", "0.375`", ",", "0.927054`", ",", "0.990903`", ",", 
       "0.508084`", ",", "0.42043`"}], "}"}], ",", 
     RowBox[{"{", 
      RowBox[{
      "0.02`", ",", "0.4`", ",", "0.924883`", ",", "0.989646`", ",", 
       "0.518229`", ",", "0.429399`"}], "}"}], ",", 
     RowBox[{"{", 
      RowBox[{
      "0.02`", ",", "0.425`", ",", "0.922725`", ",", "0.989359`", ",", 
       "0.527059`", ",", "0.437202`"}], "}"}], ",", 
     RowBox[{"{", 
      RowBox[{
      "0.02`", ",", "0.45`", ",", "0.92117`", ",", "0.988716`", ",", 
       "0.532237`", ",", "0.441616`"}], "}"}], ",", 
     RowBox[{"{", 
      RowBox[{
      "0.02`", ",", "0.475`", ",", "0.919627`", ",", "0.987941`", ",", 
       "0.540352`", ",", "0.449927`"}], "}"}], ",", 
     RowBox[{"{", 
      RowBox[{
      "0.02`", ",", "0.5`", ",", "0.918246`", ",", "0.987751`", ",", 
       "0.547119`", ",", "0.4555`"}], "}"}], ",", 
     RowBox[{"{", 
      RowBox[{
      "0.03`", ",", "0.`", ",", "0.956062`", ",", "0.990779`", ",", 
       "0.0225159`", ",", "0.0157252`"}], "}"}], ",", 
     RowBox[{"{", 
      RowBox[{
      "0.03`", ",", "0.025`", ",", "0.985375`", ",", "0.984346`", ",", 
       "0.0971265`", ",", "0.0717002`"}], "}"}], ",", 
     RowBox[{"{", 
      RowBox[{
      "0.03`", ",", "0.05`", ",", "0.986884`", ",", "0.976452`", ",", 
       "0.192916`", ",", "0.160964`"}], "}"}], ",", 
     RowBox[{"{", 
      RowBox[{
      "0.03`", ",", "0.075`", ",", "0.98163`", ",", "0.97147`", ",", 
       "0.25792`", ",", "0.218579`"}], "}"}], ",", 
     RowBox[{"{", 
      RowBox[{
      "0.03`", ",", "0.1`", ",", "0.975642`", ",", "0.968495`", ",", 
       "0.301228`", ",", "0.255934`"}], "}"}], ",", 
     RowBox[{"{", 
      RowBox[{
      "0.03`", ",", "0.125`", ",", "0.970444`", ",", "0.966844`", ",", 
       "0.334451`", ",", "0.283427`"}], "}"}], ",", 
     RowBox[{"{", 
      RowBox[{
      "0.03`", ",", "0.15`", ",", "0.964118`", ",", "0.968079`", ",", 
       "0.362618`", ",", "0.306024`"}], "}"}], ",", 
     RowBox[{"{", 
      RowBox[{
      "0.03`", ",", "0.175`", ",", "0.958324`", ",", "0.9708`", ",", 
       "0.388136`", ",", "0.326993`"}], "}"}], ",", 
     RowBox[{"{", 
      RowBox[{
      "0.03`", ",", "0.2`", ",", "0.953509`", ",", "0.975106`", ",", 
       "0.407594`", ",", "0.343101`"}], "}"}], ",", 
     RowBox[{"{", 
      RowBox[{
      "0.03`", ",", "0.225`", ",", "0.948069`", ",", "0.978073`", ",", 
       "0.425046`", ",", "0.355996`"}], "}"}], ",", 
     RowBox[{"{", 
      RowBox[{
      "0.03`", ",", "0.25`", ",", "0.944594`", ",", "0.983301`", ",", 
       "0.44148`", ",", "0.369914`"}], "}"}], ",", 
     RowBox[{"{", 
      RowBox[{
      "0.03`", ",", "0.275`", ",", "0.940234`", ",", "0.988461`", ",", 
       "0.45887`", ",", "0.383085`"}], "}"}], ",", 
     RowBox[{"{", 
      RowBox[{
      "0.03`", ",", "0.3`", ",", "0.93718`", ",", "0.990256`", ",", 
       "0.471848`", ",", "0.393276`"}], "}"}], ",", 
     RowBox[{"{", 
      RowBox[{
      "0.03`", ",", "0.325`", ",", "0.934477`", ",", "0.99257`", ",", 
       "0.484929`", ",", "0.403374`"}], "}"}], ",", 
     RowBox[{"{", 
      RowBox[{
      "0.03`", ",", "0.35`", ",", "0.929665`", ",", "0.991647`", ",", 
       "0.496084`", ",", "0.410292`"}], "}"}], ",", 
     RowBox[{"{", 
      RowBox[{
      "0.03`", ",", "0.375`", ",", "0.927804`", ",", "0.99128`", ",", 
       "0.508053`", ",", "0.421245`"}], "}"}], ",", 
     RowBox[{"{", 
      RowBox[{
      "0.03`", ",", "0.4`", ",", "0.925741`", ",", "0.989742`", ",", 
       "0.517443`", ",", "0.429354`"}], "}"}], ",", 
     RowBox[{"{", 
      RowBox[{
      "0.03`", ",", "0.425`", ",", "0.923573`", ",", "0.989454`", ",", 
       "0.524948`", ",", "0.435644`"}], "}"}], ",", 
     RowBox[{"{", 
      RowBox[{
      "0.03`", ",", "0.45`", ",", "0.921667`", ",", "0.988876`", ",", 
       "0.533749`", ",", "0.443556`"}], "}"}], ",", 
     RowBox[{"{", 
      RowBox[{
      "0.03`", ",", "0.475`", ",", "0.920157`", ",", "0.988356`", ",", 
       "0.540592`", ",", "0.449953`"}], "}"}], ",", 
     RowBox[{"{", 
      RowBox[{
      "0.03`", ",", "0.5`", ",", "0.919084`", ",", "0.98787`", ",", 
       "0.54663`", ",", "0.455576`"}], "}"}], ",", 
     RowBox[{"{", 
      RowBox[{
      "0.04`", ",", "0.`", ",", "0.952106`", ",", "0.990884`", ",", 
       "0.0196714`", ",", "0.0131352`"}], "}"}], ",", 
     RowBox[{"{", 
      RowBox[{
      "0.04`", ",", "0.025`", ",", "0.985523`", ",", "0.984765`", ",", 
       "0.096822`", ",", "0.0711831`"}], "}"}], ",", 
     RowBox[{"{", 
      RowBox[{
      "0.04`", ",", "0.05`", ",", "0.987487`", ",", "0.97673`", ",", 
       "0.191421`", ",", "0.159552`"}], "}"}], ",", 
     RowBox[{"{", 
      RowBox[{
      "0.04`", ",", "0.075`", ",", "0.981448`", ",", "0.971966`", ",", 
       "0.257188`", ",", "0.217739`"}], "}"}], ",", 
     RowBox[{"{", 
      RowBox[{
      "0.04`", ",", "0.1`", ",", "0.97614`", ",", "0.967941`", ",", 
       "0.300441`", ",", "0.255301`"}], "}"}], ",", 
     RowBox[{"{", 
      RowBox[{
      "0.04`", ",", "0.125`", ",", "0.970336`", ",", "0.96686`", ",", 
       "0.332654`", ",", "0.281458`"}], "}"}], ",", 
     RowBox[{"{", 
      RowBox[{
      "0.04`", ",", "0.15`", ",", "0.964067`", ",", "0.968674`", ",", 
       "0.363031`", ",", "0.306065`"}], "}"}], ",", 
     RowBox[{"{", 
      RowBox[{
      "0.04`", ",", "0.175`", ",", "0.958992`", ",", "0.970445`", ",", 
       "0.387314`", ",", "0.326687`"}], "}"}], ",", 
     RowBox[{"{", 
      RowBox[{
      "0.04`", ",", "0.2`", ",", "0.954153`", ",", "0.974575`", ",", 
       "0.408984`", ",", "0.344881`"}], "}"}], ",", 
     RowBox[{"{", 
      RowBox[{
      "0.04`", ",", "0.225`", ",", "0.948972`", ",", "0.978414`", ",", 
       "0.427368`", ",", "0.359701`"}], "}"}], ",", 
     RowBox[{"{", 
      RowBox[{
      "0.04`", ",", "0.25`", ",", "0.944874`", ",", "0.983808`", ",", 
       "0.443012`", ",", "0.371399`"}], "}"}], ",", 
     RowBox[{"{", 
      RowBox[{
      "0.04`", ",", "0.275`", ",", "0.940742`", ",", "0.988491`", ",", 
       "0.46013`", ",", "0.38498`"}], "}"}], ",", 
     RowBox[{"{", 
      RowBox[{
      "0.04`", ",", "0.3`", ",", "0.937434`", ",", "0.991115`", ",", 
       "0.47054`", ",", "0.391732`"}], "}"}], ",", 
     RowBox[{"{", 
      RowBox[{
      "0.04`", ",", "0.325`", ",", "0.933991`", ",", "0.992541`", ",", 
       "0.485402`", ",", "0.40348`"}], "}"}], ",", 
     RowBox[{"{", 
      RowBox[{
      "0.04`", ",", "0.35`", ",", "0.93037`", ",", "0.991539`", ",", 
       "0.495894`", ",", "0.410713`"}], "}"}], ",", 
     RowBox[{"{", 
      RowBox[{
      "0.04`", ",", "0.375`", ",", "0.928395`", ",", "0.991454`", ",", 
       "0.506936`", ",", "0.420195`"}], "}"}], ",", 
     RowBox[{"{", 
      RowBox[{
      "0.04`", ",", "0.4`", ",", "0.92699`", ",", "0.989898`", ",", 
       "0.516811`", ",", "0.430325`"}], "}"}], ",", 
     RowBox[{"{", 
      RowBox[{
      "0.04`", ",", "0.425`", ",", "0.924114`", ",", "0.989396`", ",", 
       "0.525438`", ",", "0.436426`"}], "}"}], ",", 
     RowBox[{"{", 
      RowBox[{
      "0.04`", ",", "0.45`", ",", "0.922131`", ",", "0.988569`", ",", 
       "0.531007`", ",", "0.440645`"}], "}"}], ",", 
     RowBox[{"{", 
      RowBox[{
      "0.04`", ",", "0.475`", ",", "0.920299`", ",", "0.988355`", ",", 
       "0.539194`", ",", "0.448375`"}], "}"}], ",", 
     RowBox[{"{", 
      RowBox[{
      "0.04`", ",", "0.5`", ",", "0.918759`", ",", "0.987683`", ",", 
       "0.547695`", ",", "0.456521`"}], "}"}], ",", 
     RowBox[{"{", 
      RowBox[{
      "0.05`", ",", "0.`", ",", "0.948074`", ",", "0.991235`", ",", 
       "0.0161106`", ",", "0.010352`"}], "}"}], ",", 
     RowBox[{"{", 
      RowBox[{
      "0.05`", ",", "0.025`", ",", "0.986173`", ",", "0.985179`", ",", 
       "0.0950053`", ",", "0.0695539`"}], "}"}], ",", 
     RowBox[{"{", 
      RowBox[{
      "0.05`", ",", "0.05`", ",", "0.98777`", ",", "0.976357`", ",", 
       "0.190268`", ",", "0.158744`"}], "}"}], ",", 
     RowBox[{"{", 
      RowBox[{
      "0.05`", ",", "0.075`", ",", "0.981702`", ",", "0.972155`", ",", 
       "0.256718`", ",", "0.217944`"}], "}"}], ",", 
     RowBox[{"{", 
      RowBox[{
      "0.05`", ",", "0.1`", ",", "0.976061`", ",", "0.968273`", ",", 
       "0.300452`", ",", "0.255468`"}], "}"}], ",", 
     RowBox[{"{", 
      RowBox[{
      "0.05`", ",", "0.125`", ",", "0.970771`", ",", "0.966454`", ",", 
       "0.332184`", ",", "0.281476`"}], "}"}], ",", 
     RowBox[{"{", 
      RowBox[{
      "0.05`", ",", "0.15`", ",", "0.964522`", ",", "0.968349`", ",", 
       "0.361603`", ",", "0.304919`"}], "}"}], ",", 
     RowBox[{"{", 
      RowBox[{
      "0.05`", ",", "0.175`", ",", "0.95901`", ",", "0.97087`", ",", 
       "0.388407`", ",", "0.327345`"}], "}"}], ",", 
     RowBox[{"{", 
      RowBox[{
      "0.05`", ",", "0.2`", ",", "0.954016`", ",", "0.974752`", ",", 
       "0.406982`", ",", "0.342267`"}], "}"}], ",", 
     RowBox[{"{", 
      RowBox[{
      "0.05`", ",", "0.225`", ",", "0.949289`", ",", "0.97802`", ",", 
       "0.42708`", ",", "0.359242`"}], "}"}], ",", 
     RowBox[{"{", 
      RowBox[{
      "0.05`", ",", "0.25`", ",", "0.94518`", ",", "0.983176`", ",", 
       "0.444054`", ",", "0.37293`"}], "}"}], ",", 
     RowBox[{"{", 
      RowBox[{
      "0.05`", ",", "0.275`", ",", "0.940833`", ",", "0.986966`", ",", 
       "0.457582`", ",", "0.38266`"}], "}"}], ",", 
     RowBox[{"{", 
      RowBox[{
      "0.05`", ",", "0.3`", ",", "0.937516`", ",", "0.989324`", ",", 
       "0.471479`", ",", "0.393497`"}], "}"}], ",", 
     RowBox[{"{", 
      RowBox[{
      "0.05`", ",", "0.325`", ",", "0.934318`", ",", "0.992015`", ",", 
       "0.485275`", ",", "0.403987`"}], "}"}], ",", 
     RowBox[{"{", 
      RowBox[{
      "0.05`", ",", "0.35`", ",", "0.930141`", ",", "0.990926`", ",", 
       "0.496307`", ",", "0.411411`"}], "}"}], ",", 
     RowBox[{"{", 
      RowBox[{
      "0.05`", ",", "0.375`", ",", "0.929585`", ",", "0.991342`", ",", 
       "0.505915`", ",", "0.420564`"}], "}"}], ",", 
     RowBox[{"{", 
      RowBox[{
      "0.05`", ",", "0.4`", ",", "0.92591`", ",", "0.989649`", ",", 
       "0.516802`", ",", "0.429039`"}], "}"}], ",", 
     RowBox[{"{", 
      RowBox[{
      "0.05`", ",", "0.425`", ",", "0.92417`", ",", "0.989771`", ",", 
       "0.525844`", ",", "0.437315`"}], "}"}], ",", 
     RowBox[{"{", 
      RowBox[{
      "0.05`", ",", "0.45`", ",", "0.92294`", ",", "0.988787`", ",", 
       "0.531103`", ",", "0.442143`"}], "}"}], ",", 
     RowBox[{"{", 
      RowBox[{
      "0.05`", ",", "0.475`", ",", "0.920472`", ",", "0.988597`", ",", 
       "0.5375`", ",", "0.446573`"}], "}"}], ",", 
     RowBox[{"{", 
      RowBox[{
      "0.05`", ",", "0.5`", ",", "0.919184`", ",", "0.987708`", ",", 
       "0.543553`", ",", "0.452714`"}], "}"}], ",", 
     RowBox[{"{", 
      RowBox[{
      "0.06`", ",", "0.`", ",", "0.952728`", ",", "0.992901`", ",", 
       "0.0148227`", ",", "0.00926455`"}], "}"}], ",", 
     RowBox[{"{", 
      RowBox[{
      "0.06`", ",", "0.025`", ",", "0.986106`", ",", "0.985865`", ",", 
       "0.0934146`", ",", "0.067787`"}], "}"}], ",", 
     RowBox[{"{", 
      RowBox[{
      "0.06`", ",", "0.05`", ",", "0.987629`", ",", "0.976776`", ",", 
       "0.189166`", ",", "0.157683`"}], "}"}], ",", 
     RowBox[{"{", 
      RowBox[{
      "0.06`", ",", "0.075`", ",", "0.981941`", ",", "0.972688`", ",", 
       "0.257147`", ",", "0.218533`"}], "}"}], ",", 
     RowBox[{"{", 
      RowBox[{
      "0.06`", ",", "0.1`", ",", "0.976499`", ",", "0.9678`", ",", 
       "0.300181`", ",", "0.255374`"}], "}"}], ",", 
     RowBox[{"{", 
      RowBox[{
      "0.06`", ",", "0.125`", ",", "0.970972`", ",", "0.966262`", ",", 
       "0.334704`", ",", "0.284282`"}], "}"}], ",", 
     RowBox[{"{", 
      RowBox[{
      "0.06`", ",", "0.15`", ",", "0.965113`", ",", "0.967944`", ",", 
       "0.360827`", ",", "0.30522`"}], "}"}], ",", 
     RowBox[{"{", 
      RowBox[{
      "0.06`", ",", "0.175`", ",", "0.959594`", ",", "0.970127`", ",", 
       "0.389572`", ",", "0.329465`"}], "}"}], ",", 
     RowBox[{"{", 
      RowBox[{
      "0.06`", ",", "0.2`", ",", "0.954498`", ",", "0.97292`", ",", 
       "0.408405`", ",", "0.344864`"}], "}"}], ",", 
     RowBox[{"{", 
      RowBox[{
      "0.06`", ",", "0.225`", ",", "0.949978`", ",", "0.978073`", ",", 
       "0.426822`", ",", "0.359236`"}], "}"}], ",", 
     RowBox[{"{", 
      RowBox[{
      "0.06`", ",", "0.25`", ",", "0.945207`", ",", "0.981416`", ",", 
       "0.438918`", ",", "0.36784`"}], "}"}], ",", 
     RowBox[{"{", 
      RowBox[{
      "0.06`", ",", "0.275`", ",", "0.941194`", ",", "0.986682`", ",", 
       "0.457502`", ",", "0.382728`"}], "}"}], ",", 
     RowBox[{"{", 
      RowBox[{
      "0.06`", ",", "0.3`", ",", "0.937716`", ",", "0.99018`", ",", 
       "0.471447`", ",", "0.39337`"}], "}"}], ",", 
     RowBox[{"{", 
      RowBox[{
      "0.06`", ",", "0.325`", ",", "0.934335`", ",", "0.992626`", ",", 
       "0.482086`", ",", "0.400464`"}], "}"}], ",", 
     RowBox[{"{", 
      RowBox[{
      "0.06`", ",", "0.35`", ",", "0.931981`", ",", "0.991424`", ",", 
       "0.497983`", ",", "0.414825`"}], "}"}], ",", 
     RowBox[{"{", 
      RowBox[{
      "0.06`", ",", "0.375`", ",", "0.928334`", ",", "0.991717`", ",", 
       "0.506169`", ",", "0.419666`"}], "}"}], ",", 
     RowBox[{"{", 
      RowBox[{
      "0.06`", ",", "0.4`", ",", "0.926233`", ",", "0.989976`", ",", 
       "0.516352`", ",", "0.428422`"}], "}"}], ",", 
     RowBox[{"{", 
      RowBox[{
      "0.06`", ",", "0.425`", ",", "0.923761`", ",", "0.989227`", ",", 
       "0.524646`", ",", "0.435493`"}], "}"}], ",", 
     RowBox[{"{", 
      RowBox[{
      "0.06`", ",", "0.45`", ",", "0.922855`", ",", "0.988969`", ",", 
       "0.532636`", ",", "0.443336`"}], "}"}], ",", 
     RowBox[{"{", 
      RowBox[{
      "0.06`", ",", "0.475`", ",", "0.921255`", ",", "0.988354`", ",", 
       "0.539025`", ",", "0.44887`"}], "}"}], ",", 
     RowBox[{"{", 
      RowBox[{
      "0.06`", ",", "0.5`", ",", "0.920253`", ",", "0.987835`", ",", 
       "0.542747`", ",", "0.452904`"}], "}"}], ",", 
     RowBox[{"{", 
      RowBox[{
      "0.07`", ",", "0.`", ",", "0.959121`", ",", "0.993788`", ",", 
       "0.0141615`", ",", "0.00888147`"}], "}"}], ",", 
     RowBox[{"{", 
      RowBox[{
      "0.07`", ",", "0.025`", ",", "0.986091`", ",", "0.986317`", ",", 
       "0.0913535`", ",", "0.0660585`"}], "}"}], ",", 
     RowBox[{"{", 
      RowBox[{
      "0.07`", ",", "0.05`", ",", "0.987728`", ",", "0.977585`", ",", 
       "0.189988`", ",", "0.158769`"}], "}"}], ",", 
     RowBox[{"{", 
      RowBox[{
      "0.07`", ",", "0.075`", ",", "0.982623`", ",", "0.972631`", ",", 
       "0.255358`", ",", "0.217058`"}], "}"}], ",", 
     RowBox[{"{", 
      RowBox[{
      "0.07`", ",", "0.1`", ",", "0.976898`", ",", "0.967941`", ",", 
       "0.301439`", ",", "0.25779`"}], "}"}], ",", 
     RowBox[{"{", 
      RowBox[{
      "0.07`", ",", "0.125`", ",", "0.971175`", ",", "0.966621`", ",", 
       "0.333092`", ",", "0.282913`"}], "}"}], ",", 
     RowBox[{"{", 
      RowBox[{
      "0.07`", ",", "0.15`", ",", "0.965619`", ",", "0.967299`", ",", 
       "0.362424`", ",", "0.307327`"}], "}"}], ",", 
     RowBox[{"{", 
      RowBox[{
      "0.07`", ",", "0.175`", ",", "0.960052`", ",", "0.968977`", ",", 
       "0.387607`", ",", "0.327879`"}], "}"}], ",", 
     RowBox[{"{", 
      RowBox[{
      "0.07`", ",", "0.2`", ",", "0.955098`", ",", "0.972649`", ",", 
       "0.406405`", ",", "0.343196`"}], "}"}], ",", 
     RowBox[{"{", 
      RowBox[{
      "0.07`", ",", "0.225`", ",", "0.949907`", ",", "0.976964`", ",", 
       "0.425625`", ",", "0.358251`"}], "}"}], ",", 
     RowBox[{"{", 
      RowBox[{
      "0.07`", ",", "0.25`", ",", "0.946192`", ",", "0.981839`", ",", 
       "0.440487`", ",", "0.370207`"}], "}"}], ",", 
     RowBox[{"{", 
      RowBox[{
      "0.07`", ",", "0.275`", ",", "0.942301`", ",", "0.987048`", ",", 
       "0.45677`", ",", "0.382983`"}], "}"}], ",", 
     RowBox[{"{", 
      RowBox[{
      "0.07`", ",", "0.3`", ",", "0.938862`", ",", "0.989715`", ",", 
       "0.470077`", ",", "0.393434`"}], "}"}], ",", 
     RowBox[{"{", 
      RowBox[{
      "0.07`", ",", "0.325`", ",", "0.935207`", ",", "0.992348`", ",", 
       "0.483996`", ",", "0.403665`"}], "}"}], ",", 
     RowBox[{"{", 
      RowBox[{
      "0.07`", ",", "0.35`", ",", "0.932611`", ",", "0.991334`", ",", 
       "0.495042`", ",", "0.412236`"}], "}"}], ",", 
     RowBox[{"{", 
      RowBox[{
      "0.07`", ",", "0.375`", ",", "0.929648`", ",", "0.992202`", ",", 
       "0.505678`", ",", "0.420226`"}], "}"}], ",", 
     RowBox[{"{", 
      RowBox[{
      "0.07`", ",", "0.4`", ",", "0.926746`", ",", "0.990193`", ",", 
       "0.515044`", ",", "0.427912`"}], "}"}], ",", 
     RowBox[{"{", 
      RowBox[{
      "0.07`", ",", "0.425`", ",", "0.925236`", ",", "0.990069`", ",", 
       "0.524061`", ",", "0.435689`"}], "}"}], ",", 
     RowBox[{"{", 
      RowBox[{
      "0.07`", ",", "0.45`", ",", "0.922559`", ",", "0.988947`", ",", 
       "0.531662`", ",", "0.44227`"}], "}"}], ",", 
     RowBox[{"{", 
      RowBox[{
      "0.07`", ",", "0.475`", ",", "0.921391`", ",", "0.988435`", ",", 
       "0.537118`", ",", "0.44725`"}], "}"}], ",", 
     RowBox[{"{", 
      RowBox[{
      "0.07`", ",", "0.5`", ",", "0.920148`", ",", "0.988022`", ",", 
       "0.544975`", ",", "0.455426`"}], "}"}], ",", 
     RowBox[{"{", 
      RowBox[{
      "0.08`", ",", "0.`", ",", "0.958855`", ",", "0.992786`", ",", 
       "0.0154645`", ",", "0.0094811`"}], "}"}], ",", 
     RowBox[{"{", 
      RowBox[{
      "0.08`", ",", "0.025`", ",", "0.985664`", ",", "0.985701`", ",", 
       "0.0890005`", ",", "0.0641057`"}], "}"}], ",", 
     RowBox[{"{", 
      RowBox[{
      "0.08`", ",", "0.05`", ",", "0.987933`", ",", "0.977871`", ",", 
       "0.189639`", ",", "0.157836`"}], "}"}], ",", 
     RowBox[{"{", 
      RowBox[{
      "0.08`", ",", "0.075`", ",", "0.982909`", ",", "0.972907`", ",", 
       "0.257242`", ",", "0.219453`"}], "}"}], ",", 
     RowBox[{"{", 
      RowBox[{
      "0.08`", ",", "0.1`", ",", "0.977735`", ",", "0.967232`", ",", 
       "0.299955`", ",", "0.256668`"}], "}"}], ",", 
     RowBox[{"{", 
      RowBox[{
      "0.08`", ",", "0.125`", ",", "0.971007`", ",", "0.966`", ",", 
       "0.334671`", ",", "0.284048`"}], "}"}], ",", 
     RowBox[{"{", 
      RowBox[{
      "0.08`", ",", "0.15`", ",", "0.965948`", ",", "0.966902`", ",", 
       "0.363547`", ",", "0.308726`"}], "}"}], ",", 
     RowBox[{"{", 
      RowBox[{
      "0.08`", ",", "0.175`", ",", "0.960592`", ",", "0.969169`", ",", 
       "0.387236`", ",", "0.328003`"}], "}"}], ",", 
     RowBox[{"{", 
      RowBox[{
      "0.08`", ",", "0.2`", ",", "0.956437`", ",", "0.972666`", ",", 
       "0.406662`", ",", "0.344175`"}], "}"}], ",", 
     RowBox[{"{", 
      RowBox[{
      "0.08`", ",", "0.225`", ",", "0.950627`", ",", "0.977436`", ",", 
       "0.424889`", ",", "0.357635`"}], "}"}], ",", 
     RowBox[{"{", 
      RowBox[{
      "0.08`", ",", "0.25`", ",", "0.946364`", ",", "0.981292`", ",", 
       "0.441406`", ",", "0.371039`"}], "}"}], ",", 
     RowBox[{"{", 
      RowBox[{
      "0.08`", ",", "0.275`", ",", "0.942534`", ",", "0.985297`", ",", 
       "0.458343`", ",", "0.38552`"}], "}"}], ",", 
     RowBox[{"{", 
      RowBox[{
      "0.08`", ",", "0.3`", ",", "0.938138`", ",", "0.988944`", ",", 
       "0.472819`", ",", "0.395426`"}], "}"}], ",", 
     RowBox[{"{", 
      RowBox[{
      "0.08`", ",", "0.325`", ",", "0.934336`", ",", "0.992699`", ",", 
       "0.4818`", ",", "0.400235`"}], "}"}], ",", 
     RowBox[{"{", 
      RowBox[{
      "0.08`", ",", "0.35`", ",", "0.931686`", ",", "0.991141`", ",", 
       "0.493931`", ",", "0.410615`"}], "}"}], ",", 
     RowBox[{"{", 
      RowBox[{
      "0.08`", ",", "0.375`", ",", "0.929174`", ",", "0.991807`", ",", 
       "0.504489`", ",", "0.418748`"}], "}"}], ",", 
     RowBox[{"{", 
      RowBox[{
      "0.08`", ",", "0.4`", ",", "0.926054`", ",", "0.990532`", ",", 
       "0.51439`", ",", "0.426554`"}], "}"}], ",", 
     RowBox[{"{", 
      RowBox[{
      "0.08`", ",", "0.425`", ",", "0.924087`", ",", "0.989911`", ",", 
       "0.524715`", ",", "0.435467`"}], "}"}], ",", 
     RowBox[{"{", 
      RowBox[{
      "0.08`", ",", "0.45`", ",", "0.92354`", ",", "0.989204`", ",", 
       "0.531033`", ",", "0.442059`"}], "}"}], ",", 
     RowBox[{"{", 
      RowBox[{
      "0.08`", ",", "0.475`", ",", "0.920825`", ",", "0.988464`", ",", 
       "0.539633`", ",", "0.449299`"}], "}"}], ",", 
     RowBox[{"{", 
      RowBox[{
      "0.08`", ",", "0.5`", ",", "0.92015`", ",", "0.988053`", ",", 
       "0.542972`", ",", "0.452665`"}], "}"}], ",", 
     RowBox[{"{", 
      RowBox[{
      "0.09`", ",", "0.`", ",", "0.954423`", ",", "0.991871`", ",", 
       "0.0148442`", ",", "0.00936907`"}], "}"}], ",", 
     RowBox[{"{", 
      RowBox[{
      "0.09`", ",", "0.025`", ",", "0.986107`", ",", "0.985955`", ",", 
       "0.0874849`", ",", "0.0625995`"}], "}"}], ",", 
     RowBox[{"{", 
      RowBox[{
      "0.09`", ",", "0.05`", ",", "0.98796`", ",", "0.978314`", ",", 
       "0.189987`", ",", "0.158505`"}], "}"}], ",", 
     RowBox[{"{", 
      RowBox[{
      "0.09`", ",", "0.075`", ",", "0.983538`", ",", "0.973498`", ",", 
       "0.258386`", ",", "0.22105`"}], "}"}], ",", 
     RowBox[{"{", 
      RowBox[{
      "0.09`", ",", "0.1`", ",", "0.977711`", ",", "0.967517`", ",", 
       "0.298244`", ",", "0.255042`"}], "}"}], ",", 
     RowBox[{"{", 
      RowBox[{
      "0.09`", ",", "0.125`", ",", "0.972585`", ",", "0.966469`", ",", 
       "0.333404`", ",", "0.284797`"}], "}"}], ",", 
     RowBox[{"{", 
      RowBox[{
      "0.09`", ",", "0.15`", ",", "0.965681`", ",", "0.967198`", ",", 
       "0.361764`", ",", "0.306733`"}], "}"}], ",", 
     RowBox[{"{", 
      RowBox[{
      "0.09`", ",", "0.175`", ",", "0.961049`", ",", "0.968732`", ",", 
       "0.387983`", ",", "0.329177`"}], "}"}], ",", 
     RowBox[{"{", 
      RowBox[{
      "0.09`", ",", "0.2`", ",", "0.955957`", ",", "0.972438`", ",", 
       "0.407733`", ",", "0.34486`"}], "}"}], ",", 
     RowBox[{"{", 
      RowBox[{
      "0.09`", ",", "0.225`", ",", "0.951113`", ",", "0.975805`", ",", 
       "0.42508`", ",", "0.358772`"}], "}"}], ",", 
     RowBox[{"{", 
      RowBox[{
      "0.09`", ",", "0.25`", ",", "0.945951`", ",", "0.980811`", ",", 
       "0.439707`", ",", "0.368914`"}], "}"}], ",", 
     RowBox[{"{", 
      RowBox[{
      "0.09`", ",", "0.275`", ",", "0.94228`", ",", "0.984451`", ",", 
       "0.454338`", ",", "0.381004`"}], "}"}], ",", 
     RowBox[{"{", 
      RowBox[{
      "0.09`", ",", "0.3`", ",", "0.939705`", ",", "0.989945`", ",", 
       "0.469031`", ",", "0.392901`"}], "}"}], ",", 
     RowBox[{"{", 
      RowBox[{
      "0.09`", ",", "0.325`", ",", "0.936161`", ",", "0.992676`", ",", 
       "0.481271`", ",", "0.401619`"}], "}"}], ",", 
     RowBox[{"{", 
      RowBox[{
      "0.09`", ",", "0.35`", ",", "0.933065`", ",", "0.99142`", ",", 
       "0.494019`", ",", "0.411825`"}], "}"}], ",", 
     RowBox[{"{", 
      RowBox[{
      "0.09`", ",", "0.375`", ",", "0.929806`", ",", "0.991826`", ",", 
       "0.505656`", ",", "0.420412`"}], "}"}], ",", 
     RowBox[{"{", 
      RowBox[{
      "0.09`", ",", "0.4`", ",", "0.928105`", ",", "0.990643`", ",", 
       "0.513045`", ",", "0.426975`"}], "}"}], ",", 
     RowBox[{"{", 
      RowBox[{
      "0.09`", ",", "0.425`", ",", "0.925385`", ",", "0.989466`", ",", 
       "0.522427`", ",", "0.434507`"}], "}"}], ",", 
     RowBox[{"{", 
      RowBox[{
      "0.09`", ",", "0.45`", ",", "0.923873`", ",", "0.989029`", ",", 
       "0.530587`", ",", "0.442023`"}], "}"}], ",", 
     RowBox[{"{", 
      RowBox[{
      "0.09`", ",", "0.475`", ",", "0.921105`", ",", "0.988578`", ",", 
       "0.536621`", ",", "0.446234`"}], "}"}], ",", 
     RowBox[{"{", 
      RowBox[{
      "0.09`", ",", "0.5`", ",", "0.920369`", ",", "0.988236`", ",", 
       "0.543034`", ",", "0.453205`"}], "}"}], ",", 
     RowBox[{"{", 
      RowBox[{
      "0.1`", ",", "0.`", ",", "0.95143`", ",", "0.991314`", ",", 
       "0.0156648`", ",", "0.00999777`"}], "}"}], ",", 
     RowBox[{"{", 
      RowBox[{
      "0.1`", ",", "0.025`", ",", "0.985303`", ",", "0.985913`", ",", 
       "0.086699`", ",", "0.0625177`"}], "}"}], ",", 
     RowBox[{"{", 
      RowBox[{
      "0.1`", ",", "0.05`", ",", "0.987796`", ",", "0.978428`", ",", 
       "0.19039`", ",", "0.159096`"}], "}"}], ",", 
     RowBox[{"{", 
      RowBox[{
      "0.1`", ",", "0.075`", ",", "0.983552`", ",", "0.973589`", ",", 
       "0.255663`", ",", "0.218817`"}], "}"}], ",", 
     RowBox[{"{", 
      RowBox[{
      "0.1`", ",", "0.1`", ",", "0.977435`", ",", "0.96827`", ",", 
       "0.300533`", ",", "0.256789`"}], "}"}], ",", 
     RowBox[{"{", 
      RowBox[{
      "0.1`", ",", "0.125`", ",", "0.972034`", ",", "0.966291`", ",", 
       "0.333785`", ",", "0.284812`"}], "}"}], ",", 
     RowBox[{"{", 
      RowBox[{
      "0.1`", ",", "0.15`", ",", "0.965861`", ",", "0.966699`", ",", 
       "0.365185`", ",", "0.310234`"}], "}"}], ",", 
     RowBox[{"{", 
      RowBox[{
      "0.1`", ",", "0.175`", ",", "0.960769`", ",", "0.968385`", ",", 
       "0.388117`", ",", "0.32874`"}], "}"}], ",", 
     RowBox[{"{", 
      RowBox[{
      "0.1`", ",", "0.2`", ",", "0.956953`", ",", "0.972095`", ",", 
       "0.40695`", ",", "0.345121`"}], "}"}], ",", 
     RowBox[{"{", 
      RowBox[{
      "0.1`", ",", "0.225`", ",", "0.952019`", ",", "0.97536`", ",", 
       "0.424144`", ",", "0.358902`"}], "}"}], ",", 
     RowBox[{"{", 
      RowBox[{
      "0.1`", ",", "0.25`", ",", "0.947958`", ",", "0.979946`", ",", 
       "0.438368`", ",", "0.370113`"}], "}"}], ",", 
     RowBox[{"{", 
      RowBox[{
      "0.1`", ",", "0.275`", ",", "0.943063`", ",", "0.986049`", ",", 
       "0.45464`", ",", "0.381685`"}], "}"}], ",", 
     RowBox[{"{", 
      RowBox[{
      "0.1`", ",", "0.3`", ",", "0.939765`", ",", "0.988757`", ",", 
       "0.469598`", ",", "0.39382`"}], "}"}], ",", 
     RowBox[{"{", 
      RowBox[{
      "0.1`", ",", "0.325`", ",", "0.935976`", ",", "0.991766`", ",", 
       "0.481742`", ",", "0.40179`"}], "}"}], ",", 
     RowBox[{"{", 
      RowBox[{
      "0.1`", ",", "0.35`", ",", "0.933567`", ",", "0.991763`", ",", 
       "0.492268`", ",", "0.410276`"}], "}"}], ",", 
     RowBox[{"{", 
      RowBox[{
      "0.1`", ",", "0.375`", ",", "0.930325`", ",", "0.991397`", ",", 
       "0.503353`", ",", "0.41901`"}], "}"}], ",", 
     RowBox[{"{", 
      RowBox[{
      "0.1`", ",", "0.4`", ",", "0.927894`", ",", "0.990307`", ",", 
       "0.514033`", ",", "0.427485`"}], "}"}], ",", 
     RowBox[{"{", 
      RowBox[{
      "0.1`", ",", "0.425`", ",", "0.925488`", ",", "0.990072`", ",", 
       "0.522167`", ",", "0.434351`"}], "}"}], ",", 
     RowBox[{"{", 
      RowBox[{
      "0.1`", ",", "0.45`", ",", "0.923606`", ",", "0.989026`", ",", 
       "0.530058`", ",", "0.441547`"}], "}"}], ",", 
     RowBox[{"{", 
      RowBox[{
      "0.1`", ",", "0.475`", ",", "0.922093`", ",", "0.988575`", ",", 
       "0.538569`", ",", "0.44973`"}], "}"}], ",", 
     RowBox[{"{", 
      RowBox[{
      "0.1`", ",", "0.5`", ",", "0.921244`", ",", "0.988162`", ",", 
       "0.543149`", ",", "0.453721`"}], "}"}], ",", 
     RowBox[{"{", 
      RowBox[{
      "0.11`", ",", "0.`", ",", "0.950254`", ",", "0.990774`", ",", 
       "0.0166287`", ",", "0.0107463`"}], "}"}], ",", 
     RowBox[{"{", 
      RowBox[{
      "0.11`", ",", "0.025`", ",", "0.985164`", ",", "0.986272`", ",", 
       "0.0862053`", ",", "0.0620067`"}], "}"}], ",", 
     RowBox[{"{", 
      RowBox[{
      "0.11`", ",", "0.05`", ",", "0.987671`", ",", "0.97882`", ",", 
       "0.190861`", ",", "0.1593`"}], "}"}], ",", 
     RowBox[{"{", 
      RowBox[{
      "0.11`", ",", "0.075`", ",", "0.983836`", ",", "0.973768`", ",", 
       "0.256505`", ",", "0.220163`"}], "}"}], ",", 
     RowBox[{"{", 
      RowBox[{
      "0.11`", ",", "0.1`", ",", "0.978436`", ",", "0.968404`", ",", 
       "0.299457`", ",", "0.256817`"}], "}"}], ",", 
     RowBox[{"{", 
      RowBox[{
      "0.11`", ",", "0.125`", ",", "0.972416`", ",", "0.96619`", ",", 
       "0.332765`", ",", "0.283647`"}], "}"}], ",", 
     RowBox[{"{", 
      RowBox[{
      "0.11`", ",", "0.15`", ",", "0.96682`", ",", "0.966673`", ",", 
       "0.36356`", ",", "0.30974`"}], "}"}], ",", 
     RowBox[{"{", 
      RowBox[{
      "0.11`", ",", "0.175`", ",", "0.960683`", ",", "0.968204`", ",", 
       "0.387776`", ",", "0.328287`"}], "}"}], ",", 
     RowBox[{"{", 
      RowBox[{
      "0.11`", ",", "0.2`", ",", "0.956734`", ",", "0.972064`", ",", 
       "0.408427`", ",", "0.346764`"}], "}"}], ",", 
     RowBox[{"{", 
      RowBox[{
      "0.11`", ",", "0.225`", ",", "0.95217`", ",", "0.976526`", ",", 
       "0.42403`", ",", "0.358527`"}], "}"}], ",", 
     RowBox[{"{", 
      RowBox[{
      "0.11`", ",", "0.25`", ",", "0.948146`", ",", "0.979111`", ",", 
       "0.438926`", ",", "0.370714`"}], "}"}], ",", 
     RowBox[{"{", 
      RowBox[{
      "0.11`", ",", "0.275`", ",", "0.942937`", ",", "0.985189`", ",", 
       "0.454956`", ",", "0.381962`"}], "}"}], ",", 
     RowBox[{"{", 
      RowBox[{
      "0.11`", ",", "0.3`", ",", "0.940605`", ",", "0.989424`", ",", 
       "0.467657`", ",", "0.392206`"}], "}"}], ",", 
     RowBox[{"{", 
      RowBox[{
      "0.11`", ",", "0.325`", ",", "0.935971`", ",", "0.991601`", ",", 
       "0.481459`", ",", "0.401758`"}], "}"}], ",", 
     RowBox[{"{", 
      RowBox[{
      "0.11`", ",", "0.35`", ",", "0.933142`", ",", "0.991289`", ",", 
       "0.492639`", ",", "0.410587`"}], "}"}], ",", 
     RowBox[{"{", 
      RowBox[{
      "0.11`", ",", "0.375`", ",", "0.929476`", ",", "0.991477`", ",", 
       "0.503477`", ",", "0.418266`"}], "}"}], ",", 
     RowBox[{"{", 
      RowBox[{
      "0.11`", ",", "0.4`", ",", "0.927875`", ",", "0.990507`", ",", 
       "0.51353`", ",", "0.427018`"}], "}"}], ",", 
     RowBox[{"{", 
      RowBox[{
      "0.11`", ",", "0.425`", ",", "0.925462`", ",", "0.989965`", ",", 
       "0.523508`", ",", "0.435683`"}], "}"}], ",", 
     RowBox[{"{", 
      RowBox[{
      "0.11`", ",", "0.45`", ",", "0.92496`", ",", "0.989373`", ",", 
       "0.529077`", ",", "0.441924`"}], "}"}], ",", 
     RowBox[{"{", 
      RowBox[{
      "0.11`", ",", "0.475`", ",", "0.921826`", ",", "0.988605`", ",", 
       "0.537295`", ",", "0.447454`"}], "}"}], ",", 
     RowBox[{"{", 
      RowBox[{
      "0.11`", ",", "0.5`", ",", "0.920487`", ",", "0.988213`", ",", 
       "0.541681`", ",", "0.451682`"}], "}"}], ",", 
     RowBox[{"{", 
      RowBox[{
      "0.12`", ",", "0.`", ",", "0.94883`", ",", "0.990929`", ",", 
       "0.0178153`", ",", "0.0116213`"}], "}"}], ",", 
     RowBox[{"{", 
      RowBox[{
      "0.12`", ",", "0.025`", ",", "0.984678`", ",", "0.986587`", ",", 
       "0.0863975`", ",", "0.0620392`"}], "}"}], ",", 
     RowBox[{"{", 
      RowBox[{
      "0.12`", ",", "0.05`", ",", "0.988161`", ",", "0.979087`", ",", 
       "0.190623`", ",", "0.159453`"}], "}"}], ",", 
     RowBox[{"{", 
      RowBox[{
      "0.12`", ",", "0.075`", ",", "0.984102`", ",", "0.973606`", ",", 
       "0.257038`", ",", "0.220686`"}], "}"}], ",", 
     RowBox[{"{", 
      RowBox[{
      "0.12`", ",", "0.1`", ",", "0.978969`", ",", "0.968949`", ",", 
       "0.299404`", ",", "0.257239`"}], "}"}], ",", 
     RowBox[{"{", 
      RowBox[{
      "0.12`", ",", "0.125`", ",", "0.972707`", ",", "0.965918`", ",", 
       "0.332127`", ",", "0.283842`"}], "}"}], ",", 
     RowBox[{"{", 
      RowBox[{
      "0.12`", ",", "0.15`", ",", "0.966335`", ",", "0.96578`", ",", 
       "0.363555`", ",", "0.308979`"}], "}"}], ",", 
     RowBox[{"{", 
      RowBox[{
      "0.12`", ",", "0.175`", ",", "0.961345`", ",", "0.968285`", ",", 
       "0.387376`", ",", "0.328315`"}], "}"}], ",", 
     RowBox[{"{", 
      RowBox[{
      "0.12`", ",", "0.2`", ",", "0.956985`", ",", "0.970703`", ",", 
       "0.405481`", ",", "0.343657`"}], "}"}], ",", 
     RowBox[{"{", 
      RowBox[{
      "0.12`", ",", "0.225`", ",", "0.952968`", ",", "0.974917`", ",", 
       "0.423537`", ",", "0.358636`"}], "}"}], ",", 
     RowBox[{"{", 
      RowBox[{
      "0.12`", ",", "0.25`", ",", "0.947934`", ",", "0.978865`", ",", 
       "0.438087`", ",", "0.369911`"}], "}"}], ",", 
     RowBox[{"{", 
      RowBox[{
      "0.12`", ",", "0.275`", ",", "0.943345`", ",", "0.983952`", ",", 
       "0.454946`", ",", "0.382216`"}], "}"}], ",", 
     RowBox[{"{", 
      RowBox[{
      "0.12`", ",", "0.3`", ",", "0.941007`", ",", "0.987468`", ",", 
       "0.467816`", ",", "0.392993`"}], "}"}], ",", 
     RowBox[{"{", 
      RowBox[{
      "0.12`", ",", "0.325`", ",", "0.93652`", ",", "0.9907`", ",", 
       "0.480752`", ",", "0.401823`"}], "}"}], ",", 
     RowBox[{"{", 
      RowBox[{
      "0.12`", ",", "0.35`", ",", "0.933781`", ",", "0.991794`", ",", 
       "0.492471`", ",", "0.411012`"}], "}"}], ",", 
     RowBox[{"{", 
      RowBox[{
      "0.12`", ",", "0.375`", ",", "0.931092`", ",", "0.991571`", ",", 
       "0.503234`", ",", "0.419122`"}], "}"}], ",", 
     RowBox[{"{", 
      RowBox[{
      "0.12`", ",", "0.4`", ",", "0.929167`", ",", "0.990746`", ",", 
       "0.511426`", ",", "0.425883`"}], "}"}], ",", 
     RowBox[{"{", 
      RowBox[{
      "0.12`", ",", "0.425`", ",", "0.925973`", ",", "0.990059`", ",", 
       "0.521821`", ",", "0.434508`"}], "}"}], ",", 
     RowBox[{"{", 
      RowBox[{
      "0.12`", ",", "0.45`", ",", "0.924174`", ",", "0.989431`", ",", 
       "0.53099`", ",", "0.44273`"}], "}"}], ",", 
     RowBox[{"{", 
      RowBox[{
      "0.12`", ",", "0.475`", ",", "0.922896`", ",", "0.988921`", ",", 
       "0.538628`", ",", "0.450103`"}], "}"}], ",", 
     RowBox[{"{", 
      RowBox[{
      "0.12`", ",", "0.5`", ",", "0.922066`", ",", "0.988625`", ",", 
       "0.539845`", ",", "0.451376`"}], "}"}], ",", 
     RowBox[{"{", 
      RowBox[{
      "0.13`", ",", "0.`", ",", "0.955893`", ",", "0.991894`", ",", 
       "0.0190631`", ",", "0.0121192`"}], "}"}], ",", 
     RowBox[{"{", 
      RowBox[{
      "0.13`", ",", "0.025`", ",", "0.984006`", ",", "0.986754`", ",", 
       "0.0894345`", ",", "0.0643062`"}], "}"}], ",", 
     RowBox[{"{", 
      RowBox[{
      "0.13`", ",", "0.05`", ",", "0.987662`", ",", "0.979948`", ",", 
       "0.191021`", ",", "0.159339`"}], "}"}], ",", 
     RowBox[{"{", 
      RowBox[{
      "0.13`", ",", "0.075`", ",", "0.983938`", ",", "0.973578`", ",", 
       "0.255758`", ",", "0.219285`"}], "}"}], ",", 
     RowBox[{"{", 
      RowBox[{
      "0.13`", ",", "0.1`", ",", "0.979103`", ",", "0.968953`", ",", 
       "0.297947`", ",", "0.255911`"}], "}"}], ",", 
     RowBox[{"{", 
      RowBox[{
      "0.13`", ",", "0.125`", ",", "0.973435`", ",", "0.966086`", ",", 
       "0.333997`", ",", "0.285484`"}], "}"}], ",", 
     RowBox[{"{", 
      RowBox[{
      "0.13`", ",", "0.15`", ",", "0.96761`", ",", "0.965793`", ",", 
       "0.362946`", ",", "0.309296`"}], "}"}], ",", 
     RowBox[{"{", 
      RowBox[{
      "0.13`", ",", "0.175`", ",", "0.961866`", ",", "0.967414`", ",", 
       "0.385677`", ",", "0.327165`"}], "}"}], ",", 
     RowBox[{"{", 
      RowBox[{
      "0.13`", ",", "0.2`", ",", "0.957387`", ",", "0.970809`", ",", 
       "0.406487`", ",", "0.344781`"}], "}"}], ",", 
     RowBox[{"{", 
      RowBox[{
      "0.13`", ",", "0.225`", ",", "0.952899`", ",", "0.974998`", ",", 
       "0.424177`", ",", "0.359104`"}], "}"}], ",", 
     RowBox[{"{", 
      RowBox[{
      "0.13`", ",", "0.25`", ",", "0.948513`", ",", "0.978761`", ",", 
       "0.439186`", ",", "0.371548`"}], "}"}], ",", 
     RowBox[{"{", 
      RowBox[{
      "0.13`", ",", "0.275`", ",", "0.943683`", ",", "0.984408`", ",", 
       "0.455218`", ",", "0.383026`"}], "}"}], ",", 
     RowBox[{"{", 
      RowBox[{
      "0.13`", ",", "0.3`", ",", "0.941234`", ",", "0.988153`", ",", 
       "0.466587`", ",", "0.391906`"}], "}"}], ",", 
     RowBox[{"{", 
      RowBox[{
      "0.13`", ",", "0.325`", ",", "0.93782`", ",", "0.990806`", ",", 
       "0.480625`", ",", "0.402754`"}], "}"}], ",", 
     RowBox[{"{", 
      RowBox[{
      "0.13`", ",", "0.35`", ",", "0.933125`", ",", "0.991651`", ",", 
       "0.493445`", ",", "0.411231`"}], "}"}], ",", 
     RowBox[{"{", 
      RowBox[{
      "0.13`", ",", "0.375`", ",", "0.931407`", ",", "0.992069`", ",", 
       "0.504981`", ",", "0.421532`"}], "}"}], ",", 
     RowBox[{"{", 
      RowBox[{
      "0.13`", ",", "0.4`", ",", "0.928755`", ",", "0.990811`", ",", 
       "0.511467`", ",", "0.425877`"}], "}"}], ",", 
     RowBox[{"{", 
      RowBox[{
      "0.13`", ",", "0.425`", ",", "0.926765`", ",", "0.989955`", ",", 
       "0.52098`", ",", "0.434315`"}], "}"}], ",", 
     RowBox[{"{", 
      RowBox[{
      "0.13`", ",", "0.45`", ",", "0.924619`", ",", "0.989381`", ",", 
       "0.529554`", ",", "0.44197`"}], "}"}], ",", 
     RowBox[{"{", 
      RowBox[{
      "0.13`", ",", "0.475`", ",", "0.922186`", ",", "0.988367`", ",", 
       "0.536349`", ",", "0.44725`"}], "}"}], ",", 
     RowBox[{"{", 
      RowBox[{
      "0.13`", ",", "0.5`", ",", "0.921429`", ",", "0.988284`", ",", 
       "0.540983`", ",", "0.451838`"}], "}"}], ",", 
     RowBox[{"{", 
      RowBox[{
      "0.14`", ",", "0.`", ",", "0.957181`", ",", "0.994377`", ",", 
       "0.0197361`", ",", "0.0132005`"}], "}"}], ",", 
     RowBox[{"{", 
      RowBox[{
      "0.14`", ",", "0.025`", ",", "0.983973`", ",", "0.987035`", ",", 
       "0.0911428`", ",", "0.0664651`"}], "}"}], ",", 
     RowBox[{"{", 
      RowBox[{
      "0.14`", ",", "0.05`", ",", "0.987792`", ",", "0.980156`", ",", 
       "0.191245`", ",", "0.159164`"}], "}"}], ",", 
     RowBox[{"{", 
      RowBox[{
      "0.14`", ",", "0.075`", ",", "0.98458`", ",", "0.97432`", ",", 
       "0.254959`", ",", "0.218962`"}], "}"}], ",", 
     RowBox[{"{", 
      RowBox[{
      "0.14`", ",", "0.1`", ",", "0.978929`", ",", "0.969156`", ",", 
       "0.300338`", ",", "0.258189`"}], "}"}], ",", 
     RowBox[{"{", 
      RowBox[{
      "0.14`", ",", "0.125`", ",", "0.973247`", ",", "0.965872`", ",", 
       "0.33375`", ",", "0.285771`"}], "}"}], ",", 
     RowBox[{"{", 
      RowBox[{
      "0.14`", ",", "0.15`", ",", "0.967242`", ",", "0.965667`", ",", 
       "0.363707`", ",", "0.309906`"}], "}"}], ",", 
     RowBox[{"{", 
      RowBox[{
      "0.14`", ",", "0.175`", ",", "0.962245`", ",", "0.967091`", ",", 
       "0.38857`", ",", "0.33091`"}], "}"}], ",", 
     RowBox[{"{", 
      RowBox[{
      "0.14`", ",", "0.2`", ",", "0.957685`", ",", "0.970749`", ",", 
       "0.40646`", ",", "0.344868`"}], "}"}], ",", 
     RowBox[{"{", 
      RowBox[{
      "0.14`", ",", "0.225`", ",", "0.952905`", ",", "0.97454`", ",", 
       "0.42228`", ",", "0.357797`"}], "}"}], ",", 
     RowBox[{"{", 
      RowBox[{
      "0.14`", ",", "0.25`", ",", "0.949185`", ",", "0.978293`", ",", 
       "0.438642`", ",", "0.371464`"}], "}"}], ",", 
     RowBox[{"{", 
      RowBox[{
      "0.14`", ",", "0.275`", ",", "0.94509`", ",", "0.982579`", ",", 
       "0.454396`", ",", "0.383608`"}], "}"}], ",", 
     RowBox[{"{", 
      RowBox[{
      "0.14`", ",", "0.3`", ",", "0.941124`", ",", "0.986684`", ",", 
       "0.46594`", ",", "0.39151`"}], "}"}], ",", 
     RowBox[{"{", 
      RowBox[{
      "0.14`", ",", "0.325`", ",", "0.937167`", ",", "0.990867`", ",", 
       "0.479554`", ",", "0.40162`"}], "}"}], ",", 
     RowBox[{"{", 
      RowBox[{
      "0.14`", ",", "0.35`", ",", "0.935081`", ",", "0.991501`", ",", 
       "0.489313`", ",", "0.408793`"}], "}"}], ",", 
     RowBox[{"{", 
      RowBox[{
      "0.14`", ",", "0.375`", ",", "0.931134`", ",", "0.991514`", ",", 
       "0.502991`", ",", "0.419083`"}], "}"}], ",", 
     RowBox[{"{", 
      RowBox[{
      "0.14`", ",", "0.4`", ",", "0.929231`", ",", "0.990799`", ",", 
       "0.512788`", ",", "0.428199`"}], "}"}], ",", 
     RowBox[{"{", 
      RowBox[{
      "0.14`", ",", "0.425`", ",", "0.9264`", ",", "0.989818`", ",", 
       "0.520721`", ",", "0.433808`"}], "}"}], ",", 
     RowBox[{"{", 
      RowBox[{
      "0.14`", ",", "0.45`", ",", "0.924044`", ",", "0.989514`", ",", 
       "0.530213`", ",", "0.44193`"}], "}"}], ",", 
     RowBox[{"{", 
      RowBox[{
      "0.14`", ",", "0.475`", ",", "0.924056`", ",", "0.988941`", ",", 
       "0.534879`", ",", "0.447006`"}], "}"}], ",", 
     RowBox[{"{", 
      RowBox[{
      "0.14`", ",", "0.5`", ",", "0.922178`", ",", "0.988229`", ",", 
       "0.539555`", ",", "0.450942`"}], "}"}], ",", 
     RowBox[{"{", 
      RowBox[{
      "0.15`", ",", "0.`", ",", "0.95249`", ",", "0.993263`", ",", 
       "0.0217302`", ",", "0.0142749`"}], "}"}], ",", 
     RowBox[{"{", 
      RowBox[{
      "0.15`", ",", "0.025`", ",", "0.983727`", ",", "0.987206`", ",", 
       "0.094089`", ",", "0.068961`"}], "}"}], ",", 
     RowBox[{"{", 
      RowBox[{
      "0.15`", ",", "0.05`", ",", "0.987783`", ",", "0.980883`", ",", 
       "0.191834`", ",", "0.159567`"}], "}"}], ",", 
     RowBox[{"{", 
      RowBox[{
      "0.15`", ",", "0.075`", ",", "0.984968`", ",", "0.975048`", ",", 
       "0.254016`", ",", "0.21825`"}], "}"}], ",", 
     RowBox[{"{", 
      RowBox[{
      "0.15`", ",", "0.1`", ",", "0.979587`", ",", "0.969663`", ",", 
       "0.298139`", ",", "0.25618`"}], "}"}], ",", 
     RowBox[{"{", 
      RowBox[{
      "0.15`", ",", "0.125`", ",", "0.974084`", ",", "0.965334`", ",", 
       "0.333859`", ",", "0.286396`"}], "}"}], ",", 
     RowBox[{"{", 
      RowBox[{
      "0.15`", ",", "0.15`", ",", "0.967633`", ",", "0.965242`", ",", 
       "0.363194`", ",", "0.309416`"}], "}"}], ",", 
     RowBox[{"{", 
      RowBox[{
      "0.15`", ",", "0.175`", ",", "0.962643`", ",", "0.966222`", ",", 
       "0.3838`", ",", "0.326133`"}], "}"}], ",", 
     RowBox[{"{", 
      RowBox[{
      "0.15`", ",", "0.2`", ",", "0.958509`", ",", "0.969797`", ",", 
       "0.405883`", ",", "0.345045`"}], "}"}], ",", 
     RowBox[{"{", 
      RowBox[{
      "0.15`", ",", "0.225`", ",", "0.953818`", ",", "0.973943`", ",", 
       "0.423918`", ",", "0.360079`"}], "}"}], ",", 
     RowBox[{"{", 
      RowBox[{
      "0.15`", ",", "0.25`", ",", "0.948588`", ",", "0.977812`", ",", 
       "0.435912`", ",", "0.368336`"}], "}"}], ",", 
     RowBox[{"{", 
      RowBox[{
      "0.15`", ",", "0.275`", ",", "0.944962`", ",", "0.98214`", ",", 
       "0.450946`", ",", "0.380191`"}], "}"}], ",", 
     RowBox[{"{", 
      RowBox[{
      "0.15`", ",", "0.3`", ",", "0.941548`", ",", "0.986677`", ",", 
       "0.469008`", ",", "0.395073`"}], "}"}], ",", 
     RowBox[{"{", 
      RowBox[{
      "0.15`", ",", "0.325`", ",", "0.937612`", ",", "0.989908`", ",", 
       "0.479035`", ",", "0.402118`"}], "}"}], ",", 
     RowBox[{"{", 
      RowBox[{
      "0.15`", ",", "0.35`", ",", "0.935255`", ",", "0.991466`", ",", 
       "0.493466`", ",", "0.413651`"}], "}"}], ",", 
     RowBox[{"{", 
      RowBox[{
      "0.15`", ",", "0.375`", ",", "0.932435`", ",", "0.991238`", ",", 
       "0.50191`", ",", "0.419752`"}], "}"}], ",", 
     RowBox[{"{", 
      RowBox[{
      "0.15`", ",", "0.4`", ",", "0.92859`", ",", "0.990611`", ",", 
       "0.510812`", ",", "0.425497`"}], "}"}], ",", 
     RowBox[{"{", 
      RowBox[{
      "0.15`", ",", "0.425`", ",", "0.926462`", ",", "0.989684`", ",", 
       "0.520823`", ",", "0.434345`"}], "}"}], ",", 
     RowBox[{"{", 
      RowBox[{
      "0.15`", ",", "0.45`", ",", "0.925166`", ",", "0.989679`", ",", 
       "0.527056`", ",", "0.439643`"}], "}"}], ",", 
     RowBox[{"{", 
      RowBox[{
      "0.15`", ",", "0.475`", ",", "0.9235`", ",", "0.988756`", ",", 
       "0.536053`", ",", "0.447804`"}], "}"}], ",", 
     RowBox[{"{", 
      RowBox[{
      "0.15`", ",", "0.5`", ",", "0.921361`", ",", "0.988346`", ",", 
       "0.540374`", ",", "0.451012`"}], "}"}], ",", 
     RowBox[{"{", 
      RowBox[{
      "0.16`", ",", "0.`", ",", "0.950161`", ",", "0.991763`", ",", 
       "0.0243768`", ",", "0.0158527`"}], "}"}], ",", 
     RowBox[{"{", 
      RowBox[{
      "0.16`", ",", "0.025`", ",", "0.984237`", ",", "0.987598`", ",", 
       "0.0956784`", ",", "0.070866`"}], "}"}], ",", 
     RowBox[{"{", 
      RowBox[{
      "0.16`", ",", "0.05`", ",", "0.988002`", ",", "0.980928`", ",", 
       "0.192998`", ",", "0.161032`"}], "}"}], ",", 
     RowBox[{"{", 
      RowBox[{
      "0.16`", ",", "0.075`", ",", "0.985045`", ",", "0.975166`", ",", 
       "0.253892`", ",", "0.218411`"}], "}"}], ",", 
     RowBox[{"{", 
      RowBox[{
      "0.16`", ",", "0.1`", ",", "0.97984`", ",", "0.96901`", ",", 
       "0.298635`", ",", "0.25718`"}], "}"}], ",", 
     RowBox[{"{", 
      RowBox[{
      "0.16`", ",", "0.125`", ",", "0.973537`", ",", "0.964868`", ",", 
       "0.334469`", ",", "0.286426`"}], "}"}], ",", 
     RowBox[{"{", 
      RowBox[{
      "0.16`", ",", "0.15`", ",", "0.968524`", ",", "0.96492`", ",", 
       "0.364921`", ",", "0.311921`"}], "}"}], ",", 
     RowBox[{"{", 
      RowBox[{
      "0.16`", ",", "0.175`", ",", "0.963085`", ",", "0.966964`", ",", 
       "0.386772`", ",", "0.329146`"}], "}"}], ",", 
     RowBox[{"{", 
      RowBox[{
      "0.16`", ",", "0.2`", ",", "0.958026`", ",", "0.969682`", ",", 
       "0.40729`", ",", "0.346558`"}], "}"}], ",", 
     RowBox[{"{", 
      RowBox[{
      "0.16`", ",", "0.225`", ",", "0.953822`", ",", "0.973232`", ",", 
       "0.423104`", ",", "0.359551`"}], "}"}], ",", 
     RowBox[{"{", 
      RowBox[{
      "0.16`", ",", "0.25`", ",", "0.949221`", ",", "0.977522`", ",", 
       "0.437792`", ",", "0.370919`"}], "}"}], ",", 
     RowBox[{"{", 
      RowBox[{
      "0.16`", ",", "0.275`", ",", "0.944996`", ",", "0.983144`", ",", 
       "0.454144`", ",", "0.383053`"}], "}"}], ",", 
     RowBox[{"{", 
      RowBox[{
      "0.16`", ",", "0.3`", ",", "0.942235`", ",", "0.987031`", ",", 
       "0.466433`", ",", "0.393106`"}], "}"}], ",", 
     RowBox[{"{", 
      RowBox[{
      "0.16`", ",", "0.325`", ",", "0.937282`", ",", "0.989025`", ",", 
       "0.477069`", ",", "0.399541`"}], "}"}], ",", 
     RowBox[{"{", 
      RowBox[{
      "0.16`", ",", "0.35`", ",", "0.934984`", ",", "0.991126`", ",", 
       "0.490009`", ",", "0.409579`"}], "}"}], ",", 
     RowBox[{"{", 
      RowBox[{
      "0.16`", ",", "0.375`", ",", "0.931408`", ",", "0.991205`", ",", 
       "0.501285`", ",", "0.418634`"}], "}"}], ",", 
     RowBox[{"{", 
      RowBox[{
      "0.16`", ",", "0.4`", ",", "0.929853`", ",", "0.991051`", ",", 
       "0.509718`", ",", "0.42531`"}], "}"}], ",", 
     RowBox[{"{", 
      RowBox[{
      "0.16`", ",", "0.425`", ",", "0.927573`", ",", "0.989716`", ",", 
       "0.51913`", ",", "0.433499`"}], "}"}], ",", 
     RowBox[{"{", 
      RowBox[{
      "0.16`", ",", "0.45`", ",", "0.925582`", ",", "0.989568`", ",", 
       "0.527271`", ",", "0.4401`"}], "}"}], ",", 
     RowBox[{"{", 
      RowBox[{
      "0.16`", ",", "0.475`", ",", "0.923518`", ",", "0.988466`", ",", 
       "0.533091`", ",", "0.444725`"}], "}"}], ",", 
     RowBox[{"{", 
      RowBox[{
      "0.16`", ",", "0.5`", ",", "0.922902`", ",", "0.988525`", ",", 
       "0.541214`", ",", "0.453513`"}], "}"}], ",", 
     RowBox[{"{", 
      RowBox[{
      "0.17`", ",", "0.`", ",", "0.951548`", ",", "0.991085`", ",", 
       "0.0287913`", ",", "0.0200388`"}], "}"}], ",", 
     RowBox[{"{", 
      RowBox[{
      "0.17`", ",", "0.025`", ",", "0.984206`", ",", "0.987706`", ",", 
       "0.0982399`", ",", "0.0734079`"}], "}"}], ",", 
     RowBox[{"{", 
      RowBox[{
      "0.17`", ",", "0.05`", ",", "0.988295`", ",", "0.981431`", ",", 
       "0.191036`", ",", "0.159224`"}], "}"}], ",", 
     RowBox[{"{", 
      RowBox[{
      "0.17`", ",", "0.075`", ",", "0.985769`", ",", "0.975588`", ",", 
       "0.251764`", ",", "0.216452`"}], "}"}], ",", 
     RowBox[{"{", 
      RowBox[{
      "0.17`", ",", "0.1`", ",", "0.979821`", ",", "0.969069`", ",", 
       "0.299344`", ",", "0.257193`"}], "}"}], ",", 
     RowBox[{"{", 
      RowBox[{
      "0.17`", ",", "0.125`", ",", "0.973823`", ",", "0.964498`", ",", 
       "0.334983`", ",", "0.287788`"}], "}"}], ",", 
     RowBox[{"{", 
      RowBox[{
      "0.17`", ",", "0.15`", ",", "0.968022`", ",", "0.964084`", ",", 
       "0.364103`", ",", "0.310795`"}], "}"}], ",", 
     RowBox[{"{", 
      RowBox[{
      "0.17`", ",", "0.175`", ",", "0.963515`", ",", "0.965985`", ",", 
       "0.387408`", ",", "0.330289`"}], "}"}], ",", 
     RowBox[{"{", 
      RowBox[{
      "0.17`", ",", "0.2`", ",", "0.958279`", ",", "0.969624`", ",", 
       "0.405369`", ",", "0.344717`"}], "}"}], ",", 
     RowBox[{"{", 
      RowBox[{
      "0.17`", ",", "0.225`", ",", "0.953955`", ",", "0.973291`", ",", 
       "0.424528`", ",", "0.360766`"}], "}"}], ",", 
     RowBox[{"{", 
      RowBox[{
      "0.17`", ",", "0.25`", ",", "0.95021`", ",", "0.977339`", ",", 
       "0.437539`", ",", "0.371077`"}], "}"}], ",", 
     RowBox[{"{", 
      RowBox[{
      "0.17`", ",", "0.275`", ",", "0.945974`", ",", "0.981574`", ",", 
       "0.453463`", ",", "0.383709`"}], "}"}], ",", 
     RowBox[{"{", 
      RowBox[{
      "0.17`", ",", "0.3`", ",", "0.942313`", ",", "0.986276`", ",", 
       "0.462448`", ",", "0.3894`"}], "}"}], ",", 
     RowBox[{"{", 
      RowBox[{
      "0.17`", ",", "0.325`", ",", "0.938258`", ",", "0.98934`", ",", 
       "0.478527`", ",", "0.401884`"}], "}"}], ",", 
     RowBox[{"{", 
      RowBox[{
      "0.17`", ",", "0.35`", ",", "0.935659`", ",", "0.991303`", ",", 
       "0.488292`", ",", "0.408918`"}], "}"}], ",", 
     RowBox[{"{", 
      RowBox[{
      "0.17`", ",", "0.375`", ",", "0.931281`", ",", "0.991455`", ",", 
       "0.502008`", ",", "0.418749`"}], "}"}], ",", 
     RowBox[{"{", 
      RowBox[{
      "0.17`", ",", "0.4`", ",", "0.929855`", ",", "0.991301`", ",", 
       "0.509208`", ",", "0.4244`"}], "}"}], ",", 
     RowBox[{"{", 
      RowBox[{
      "0.17`", ",", "0.425`", ",", "0.927177`", ",", "0.989984`", ",", 
       "0.518285`", ",", "0.432233`"}], "}"}], ",", 
     RowBox[{"{", 
      RowBox[{
      "0.17`", ",", "0.45`", ",", "0.925799`", ",", "0.98963`", ",", 
       "0.527694`", ",", "0.441325`"}], "}"}], ",", 
     RowBox[{"{", 
      RowBox[{
      "0.17`", ",", "0.475`", ",", "0.92425`", ",", "0.988728`", ",", 
       "0.535808`", ",", "0.448873`"}], "}"}], ",", 
     RowBox[{"{", 
      RowBox[{
      "0.17`", ",", "0.5`", ",", "0.921626`", ",", "0.988202`", ",", 
       "0.541063`", ",", "0.451956`"}], "}"}], ",", 
     RowBox[{"{", 
      RowBox[{
      "0.18`", ",", "0.`", ",", "0.953014`", ",", "0.991228`", ",", 
       "0.0307362`", ",", "0.0220882`"}], "}"}], ",", 
     RowBox[{"{", 
      RowBox[{
      "0.18`", ",", "0.025`", ",", "0.98465`", ",", "0.987845`", ",", 
       "0.0980537`", ",", "0.0733982`"}], "}"}], ",", 
     RowBox[{"{", 
      RowBox[{
      "0.18`", ",", "0.05`", ",", "0.988728`", ",", "0.981618`", ",", 
       "0.190392`", ",", "0.159166`"}], "}"}], ",", 
     RowBox[{"{", 
      RowBox[{
      "0.18`", ",", "0.075`", ",", "0.98534`", ",", "0.975132`", ",", 
       "0.252275`", ",", "0.216336`"}], "}"}], ",", 
     RowBox[{"{", 
      RowBox[{
      "0.18`", ",", "0.1`", ",", "0.980226`", ",", "0.967982`", ",", 
       "0.297456`", ",", "0.255809`"}], "}"}], ",", 
     RowBox[{"{", 
      RowBox[{
      "0.18`", ",", "0.125`", ",", "0.974104`", ",", "0.963957`", ",", 
       "0.337425`", ",", "0.289834`"}], "}"}], ",", 
     RowBox[{"{", 
      RowBox[{
      "0.18`", ",", "0.15`", ",", "0.968592`", ",", "0.963402`", ",", 
       "0.364768`", ",", "0.311715`"}], "}"}], ",", 
     RowBox[{"{", 
      RowBox[{
      "0.18`", ",", "0.175`", ",", "0.964119`", ",", "0.965768`", ",", 
       "0.390015`", ",", "0.334375`"}], "}"}], ",", 
     RowBox[{"{", 
      RowBox[{
      "0.18`", ",", "0.2`", ",", "0.959768`", ",", "0.968362`", ",", 
       "0.40614`", ",", "0.347111`"}], "}"}], ",", 
     RowBox[{"{", 
      RowBox[{
      "0.18`", ",", "0.225`", ",", "0.954338`", ",", "0.972336`", ",", 
       "0.419854`", ",", "0.356699`"}], "}"}], ",", 
     RowBox[{"{", 
      RowBox[{
      "0.18`", ",", "0.25`", ",", "0.949453`", ",", "0.976385`", ",", 
       "0.437616`", ",", "0.370602`"}], "}"}], ",", 
     RowBox[{"{", 
      RowBox[{
      "0.18`", ",", "0.275`", ",", "0.947006`", ",", "0.981621`", ",", 
       "0.450829`", ",", "0.381685`"}], "}"}], ",", 
     RowBox[{"{", 
      RowBox[{
      "0.18`", ",", "0.3`", ",", "0.942527`", ",", "0.986189`", ",", 
       "0.46473`", ",", "0.391546`"}], "}"}], ",", 
     RowBox[{"{", 
      RowBox[{
      "0.18`", ",", "0.325`", ",", "0.938305`", ",", "0.988563`", ",", 
       "0.477981`", ",", "0.401564`"}], "}"}], ",", 
     RowBox[{"{", 
      RowBox[{
      "0.18`", ",", "0.35`", ",", "0.936227`", ",", "0.991937`", ",", 
       "0.490027`", ",", "0.411328`"}], "}"}], ",", 
     RowBox[{"{", 
      RowBox[{
      "0.18`", ",", "0.375`", ",", "0.932811`", ",", "0.991616`", ",", 
       "0.497809`", ",", "0.415989`"}], "}"}], ",", 
     RowBox[{"{", 
      RowBox[{
      "0.18`", ",", "0.4`", ",", "0.930357`", ",", "0.991502`", ",", 
       "0.509063`", ",", "0.425384`"}], "}"}], ",", 
     RowBox[{"{", 
      RowBox[{
      "0.18`", ",", "0.425`", ",", "0.928315`", ",", "0.99032`", ",", 
       "0.51888`", ",", "0.433579`"}], "}"}], ",", 
     RowBox[{"{", 
      RowBox[{
      "0.18`", ",", "0.45`", ",", "0.925752`", ",", "0.989463`", ",", 
       "0.524909`", ",", "0.43822`"}], "}"}], ",", 
     RowBox[{"{", 
      RowBox[{
      "0.18`", ",", "0.475`", ",", "0.924552`", ",", "0.988833`", ",", 
       "0.534598`", ",", "0.447911`"}], "}"}], ",", 
     RowBox[{"{", 
      RowBox[{
      "0.18`", ",", "0.5`", ",", "0.92296`", ",", "0.988516`", ",", 
       "0.540467`", ",", "0.452847`"}], "}"}], ",", 
     RowBox[{"{", 
      RowBox[{
      "0.19`", ",", "0.`", ",", "0.951472`", ",", "0.991713`", ",", 
       "0.0313855`", ",", "0.022402`"}], "}"}], ",", 
     RowBox[{"{", 
      RowBox[{
      "0.19`", ",", "0.025`", ",", "0.984828`", ",", "0.988081`", ",", 
       "0.0996178`", ",", "0.0739897`"}], "}"}], ",", 
     RowBox[{"{", 
      RowBox[{
      "0.19`", ",", "0.05`", ",", "0.98894`", ",", "0.982345`", ",", 
       "0.189237`", ",", "0.158189`"}], "}"}], ",", 
     RowBox[{"{", 
      RowBox[{
      "0.19`", ",", "0.075`", ",", "0.985431`", ",", "0.973764`", ",", 
       "0.252196`", ",", "0.217165`"}], "}"}], ",", 
     RowBox[{"{", 
      RowBox[{
      "0.19`", ",", "0.1`", ",", "0.980217`", ",", "0.968114`", ",", 
       "0.298851`", ",", "0.256647`"}], "}"}], ",", 
     RowBox[{"{", 
      RowBox[{
      "0.19`", ",", "0.125`", ",", "0.973769`", ",", "0.963933`", ",", 
       "0.334572`", ",", "0.286313`"}], "}"}], ",", 
     RowBox[{"{", 
      RowBox[{
      "0.19`", ",", "0.15`", ",", "0.968736`", ",", "0.963668`", ",", 
       "0.365458`", ",", "0.312507`"}], "}"}], ",", 
     RowBox[{"{", 
      RowBox[{
      "0.19`", ",", "0.175`", ",", "0.963898`", ",", "0.965529`", ",", 
       "0.388455`", ",", "0.331913`"}], "}"}], ",", 
     RowBox[{"{", 
      RowBox[{
      "0.19`", ",", "0.2`", ",", "0.959465`", ",", "0.968117`", ",", 
       "0.406972`", ",", "0.347391`"}], "}"}], ",", 
     RowBox[{"{", 
      RowBox[{
      "0.19`", ",", "0.225`", ",", "0.954865`", ",", "0.97223`", ",", 
       "0.421619`", ",", "0.358796`"}], "}"}], ",", 
     RowBox[{"{", 
      RowBox[{
      "0.19`", ",", "0.25`", ",", "0.950188`", ",", "0.975727`", ",", 
       "0.43559`", ",", "0.36898`"}], "}"}], ",", 
     RowBox[{"{", 
      RowBox[{
      "0.19`", ",", "0.275`", ",", "0.946813`", ",", "0.982079`", ",", 
       "0.452173`", ",", "0.382862`"}], "}"}], ",", 
     RowBox[{"{", 
      RowBox[{
      "0.19`", ",", "0.3`", ",", "0.942624`", ",", "0.985584`", ",", 
       "0.464898`", ",", "0.392299`"}], "}"}], ",", 
     RowBox[{"{", 
      RowBox[{
      "0.19`", ",", "0.325`", ",", "0.939706`", ",", "0.988651`", ",", 
       "0.475415`", ",", "0.399691`"}], "}"}], ",", 
     RowBox[{"{", 
      RowBox[{
      "0.19`", ",", "0.35`", ",", "0.936449`", ",", "0.991306`", ",", 
       "0.489047`", ",", "0.411209`"}], "}"}], ",", 
     RowBox[{"{", 
      RowBox[{
      "0.19`", ",", "0.375`", ",", "0.933048`", ",", "0.991219`", ",", 
       "0.498645`", ",", "0.417047`"}], "}"}], ",", 
     RowBox[{"{", 
      RowBox[{
      "0.19`", ",", "0.4`", ",", "0.930711`", ",", "0.991032`", ",", 
       "0.510934`", ",", "0.427559`"}], "}"}], ",", 
     RowBox[{"{", 
      RowBox[{
      "0.19`", ",", "0.425`", ",", "0.928352`", ",", "0.990149`", ",", 
       "0.519436`", ",", "0.434329`"}], "}"}], ",", 
     RowBox[{"{", 
      RowBox[{
      "0.19`", ",", "0.45`", ",", "0.926107`", ",", "0.989449`", ",", 
       "0.527942`", ",", "0.441396`"}], "}"}], ",", 
     RowBox[{"{", 
      RowBox[{
      "0.19`", ",", "0.475`", ",", "0.92448`", ",", "0.989136`", ",", 
       "0.534293`", ",", "0.446971`"}], "}"}], ",", 
     RowBox[{"{", 
      RowBox[{
      "0.19`", ",", "0.5`", ",", "0.922662`", ",", "0.988429`", ",", 
       "0.540319`", ",", "0.452087`"}], "}"}], ",", 
     RowBox[{"{", 
      RowBox[{
      "0.2`", ",", "0.`", ",", "0.953883`", ",", "0.992419`", ",", 
       "0.0294617`", ",", "0.0207576`"}], "}"}], ",", 
     RowBox[{"{", 
      RowBox[{
      "0.2`", ",", "0.025`", ",", "0.985242`", ",", "0.988289`", ",", 
       "0.100133`", ",", "0.0749209`"}], "}"}], ",", 
     RowBox[{"{", 
      RowBox[{
      "0.2`", ",", "0.05`", ",", "0.989016`", ",", "0.982727`", ",", 
       "0.1875`", ",", "0.156242`"}], "}"}], ",", 
     RowBox[{"{", 
      RowBox[{
      "0.2`", ",", "0.075`", ",", "0.985421`", ",", "0.973454`", ",", 
       "0.251194`", ",", "0.215629`"}], "}"}], ",", 
     RowBox[{"{", 
      RowBox[{
      "0.2`", ",", "0.1`", ",", "0.980233`", ",", "0.966857`", ",", 
       "0.29657`", ",", "0.254269`"}], "}"}], ",", 
     RowBox[{"{", 
      RowBox[{
      "0.2`", ",", "0.125`", ",", "0.974247`", ",", "0.963913`", ",", 
       "0.336981`", ",", "0.288761`"}], "}"}], ",", 
     RowBox[{"{", 
      RowBox[{
      "0.2`", ",", "0.15`", ",", "0.968656`", ",", "0.963092`", ",", 
       "0.365331`", ",", "0.312059`"}], "}"}], ",", 
     RowBox[{"{", 
      RowBox[{
      "0.2`", ",", "0.175`", ",", "0.964241`", ",", "0.96476`", ",", 
       "0.3864`", ",", "0.330016`"}], "}"}], ",", 
     RowBox[{"{", 
      RowBox[{
      "0.2`", ",", "0.2`", ",", "0.959377`", ",", "0.968413`", ",", 
       "0.405844`", ",", "0.346097`"}], "}"}], ",", 
     RowBox[{"{", 
      RowBox[{
      "0.2`", ",", "0.225`", ",", "0.955059`", ",", "0.971749`", ",", 
       "0.422608`", ",", "0.359797`"}], "}"}], ",", 
     RowBox[{"{", 
      RowBox[{
      "0.2`", ",", "0.25`", ",", "0.950222`", ",", "0.975533`", ",", 
       "0.440774`", ",", "0.374512`"}], "}"}], ",", 
     RowBox[{"{", 
      RowBox[{
      "0.2`", ",", "0.275`", ",", "0.94757`", ",", "0.98051`", ",", 
       "0.449774`", ",", "0.381661`"}], "}"}], ",", 
     RowBox[{"{", 
      RowBox[{
      "0.2`", ",", "0.3`", ",", "0.943653`", ",", "0.985093`", ",", 
       "0.463733`", ",", "0.392332`"}], "}"}], ",", 
     RowBox[{"{", 
      RowBox[{
      "0.2`", ",", "0.325`", ",", "0.938842`", ",", "0.989062`", ",", 
       "0.476052`", ",", "0.400009`"}], "}"}], ",", 
     RowBox[{"{", 
      RowBox[{
      "0.2`", ",", "0.35`", ",", "0.936537`", ",", "0.991168`", ",", 
       "0.488609`", ",", "0.410498`"}], "}"}], ",", 
     RowBox[{"{", 
      RowBox[{
      "0.2`", ",", "0.375`", ",", "0.933573`", ",", "0.990477`", ",", 
       "0.499137`", ",", "0.41821`"}], "}"}], ",", 
     RowBox[{"{", 
      RowBox[{
      "0.2`", ",", "0.4`", ",", "0.930809`", ",", "0.991191`", ",", 
       "0.508783`", ",", "0.425364`"}], "}"}], ",", 
     RowBox[{"{", 
      RowBox[{
      "0.2`", ",", "0.425`", ",", "0.929172`", ",", "0.990205`", ",", 
       "0.519121`", ",", "0.434733`"}], "}"}], ",", 
     RowBox[{"{", 
      RowBox[{
      "0.2`", ",", "0.45`", ",", "0.926652`", ",", "0.989606`", ",", 
       "0.525283`", ",", "0.439165`"}], "}"}], ",", 
     RowBox[{"{", 
      RowBox[{
      "0.2`", ",", "0.475`", ",", "0.924635`", ",", "0.989159`", ",", 
       "0.535649`", ",", "0.448614`"}], "}"}], ",", 
     RowBox[{"{", 
      RowBox[{
      "0.2`", ",", "0.5`", ",", "0.924098`", ",", "0.988294`", ",", 
       "0.538025`", ",", "0.45126`"}], "}"}], ",", 
     RowBox[{"{", 
      RowBox[{
      "0.21`", ",", "0.`", ",", "0.95781`", ",", "0.994983`", ",", 
       "0.0290129`", ",", "0.0207435`"}], "}"}], ",", 
     RowBox[{"{", 
      RowBox[{
      "0.21`", ",", "0.025`", ",", "0.985284`", ",", "0.988467`", ",", 
       "0.0981754`", ",", "0.0725346`"}], "}"}], ",", 
     RowBox[{"{", 
      RowBox[{
      "0.21`", ",", "0.05`", ",", "0.989383`", ",", "0.982757`", ",", 
       "0.187495`", ",", "0.156758`"}], "}"}], ",", 
     RowBox[{"{", 
      RowBox[{
      "0.21`", ",", "0.075`", ",", "0.985859`", ",", "0.973559`", ",", 
       "0.249885`", ",", "0.215142`"}], "}"}], ",", 
     RowBox[{"{", 
      RowBox[{
      "0.21`", ",", "0.1`", ",", "0.980472`", ",", "0.967394`", ",", 
       "0.298359`", ",", "0.256224`"}], "}"}], ",", 
     RowBox[{"{", 
      RowBox[{
      "0.21`", ",", "0.125`", ",", "0.974514`", ",", "0.962768`", ",", 
       "0.336387`", ",", "0.288844`"}], "}"}], ",", 
     RowBox[{"{", 
      RowBox[{
      "0.21`", ",", "0.15`", ",", "0.96941`", ",", "0.963071`", ",", 
       "0.367855`", ",", "0.315355`"}], "}"}], ",", 
     RowBox[{"{", 
      RowBox[{
      "0.21`", ",", "0.175`", ",", "0.964596`", ",", "0.964799`", ",", 
       "0.386876`", ",", "0.331127`"}], "}"}], ",", 
     RowBox[{"{", 
      RowBox[{
      "0.21`", ",", "0.2`", ",", "0.9597`", ",", "0.967434`", ",", 
       "0.404978`", ",", "0.345647`"}], "}"}], ",", 
     RowBox[{"{", 
      RowBox[{
      "0.21`", ",", "0.225`", ",", "0.955413`", ",", "0.97073`", ",", 
       "0.420617`", ",", "0.358263`"}], "}"}], ",", 
     RowBox[{"{", 
      RowBox[{
      "0.21`", ",", "0.25`", ",", "0.950335`", ",", "0.974649`", ",", 
       "0.437712`", ",", "0.371844`"}], "}"}], ",", 
     RowBox[{"{", 
      RowBox[{
      "0.21`", ",", "0.275`", ",", "0.947667`", ",", "0.980637`", ",", 
       "0.450761`", ",", "0.382953`"}], "}"}], ",", 
     RowBox[{"{", 
      RowBox[{
      "0.21`", ",", "0.3`", ",", "0.942738`", ",", "0.984867`", ",", 
       "0.462821`", ",", "0.390252`"}], "}"}], ",", 
     RowBox[{"{", 
      RowBox[{
      "0.21`", ",", "0.325`", ",", "0.939637`", ",", "0.988322`", ",", 
       "0.476793`", ",", "0.401764`"}], "}"}], ",", 
     RowBox[{"{", 
      RowBox[{
      "0.21`", ",", "0.35`", ",", "0.935753`", ",", "0.99118`", ",", 
       "0.488107`", ",", "0.409206`"}], "}"}], ",", 
     RowBox[{"{", 
      RowBox[{
      "0.21`", ",", "0.375`", ",", "0.933842`", ",", "0.990684`", ",", 
       "0.498838`", ",", "0.418329`"}], "}"}], ",", 
     RowBox[{"{", 
      RowBox[{
      "0.21`", ",", "0.4`", ",", "0.930082`", ",", "0.990919`", ",", 
       "0.507901`", ",", "0.423937`"}], "}"}], ",", 
     RowBox[{"{", 
      RowBox[{
      "0.21`", ",", "0.425`", ",", "0.927636`", ",", "0.989829`", ",", 
       "0.518507`", ",", "0.43259`"}], "}"}], ",", 
     RowBox[{"{", 
      RowBox[{
      "0.21`", ",", "0.45`", ",", "0.927343`", ",", "0.989608`", ",", 
       "0.524684`", ",", "0.439354`"}], "}"}], ",", 
     RowBox[{"{", 
      RowBox[{
      "0.21`", ",", "0.475`", ",", "0.925457`", ",", "0.989134`", ",", 
       "0.532607`", ",", "0.446114`"}], "}"}], ",", 
     RowBox[{"{", 
      RowBox[{
      "0.21`", ",", "0.5`", ",", "0.923271`", ",", "0.988427`", ",", 
       "0.538815`", ",", "0.451187`"}], "}"}], ",", 
     RowBox[{"{", 
      RowBox[{
      "0.22`", ",", "0.`", ",", "0.959846`", ",", "0.993906`", ",", 
       "0.0299255`", ",", "0.0224735`"}], "}"}], ",", 
     RowBox[{"{", 
      RowBox[{
      "0.22`", ",", "0.025`", ",", "0.985636`", ",", "0.988657`", ",", 
       "0.0978608`", ",", "0.0723241`"}], "}"}], ",", 
     RowBox[{"{", 
      RowBox[{
      "0.22`", ",", "0.05`", ",", "0.989202`", ",", "0.982655`", ",", 
       "0.186704`", ",", "0.155858`"}], "}"}], ",", 
     RowBox[{"{", 
      RowBox[{
      "0.22`", ",", "0.075`", ",", "0.985624`", ",", "0.973699`", ",", 
       "0.248378`", ",", "0.213611`"}], "}"}], ",", 
     RowBox[{"{", 
      RowBox[{
      "0.22`", ",", "0.1`", ",", "0.979928`", ",", "0.967421`", ",", 
       "0.298349`", ",", "0.25584`"}], "}"}], ",", 
     RowBox[{"{", 
      RowBox[{
      "0.22`", ",", "0.125`", ",", "0.974667`", ",", "0.96304`", ",", 
       "0.334699`", ",", "0.28646`"}], "}"}], ",", 
     RowBox[{"{", 
      RowBox[{
      "0.22`", ",", "0.15`", ",", "0.968783`", ",", "0.962274`", ",", 
       "0.366916`", ",", "0.313784`"}], "}"}], ",", 
     RowBox[{"{", 
      RowBox[{
      "0.22`", ",", "0.175`", ",", "0.964464`", ",", "0.964365`", ",", 
       "0.387246`", ",", "0.331109`"}], "}"}], ",", 
     RowBox[{"{", 
      RowBox[{
      "0.22`", ",", "0.2`", ",", "0.959815`", ",", "0.967777`", ",", 
       "0.405039`", ",", "0.345383`"}], "}"}], ",", 
     RowBox[{"{", 
      RowBox[{
      "0.22`", ",", "0.225`", ",", "0.95541`", ",", "0.970553`", ",", 
       "0.421183`", ",", "0.359071`"}], "}"}], ",", 
     RowBox[{"{", 
      RowBox[{
      "0.22`", ",", "0.25`", ",", "0.951516`", ",", "0.974168`", ",", 
       "0.435118`", ",", "0.370636`"}], "}"}], ",", 
     RowBox[{"{", 
      RowBox[{
      "0.22`", ",", "0.275`", ",", "0.947414`", ",", "0.979461`", ",", 
       "0.451365`", ",", "0.382651`"}], "}"}], ",", 
     RowBox[{"{", 
      RowBox[{
      "0.22`", ",", "0.3`", ",", "0.943104`", ",", "0.984129`", ",", 
       "0.461562`", ",", "0.389547`"}], "}"}], ",", 
     RowBox[{"{", 
      RowBox[{
      "0.22`", ",", "0.325`", ",", "0.939286`", ",", "0.987612`", ",", 
       "0.474106`", ",", "0.398475`"}], "}"}], ",", 
     RowBox[{"{", 
      RowBox[{
      "0.22`", ",", "0.35`", ",", "0.93667`", ",", "0.990483`", ",", 
       "0.488637`", ",", "0.41119`"}], "}"}], ",", 
     RowBox[{"{", 
      RowBox[{
      "0.22`", ",", "0.375`", ",", "0.933939`", ",", "0.990622`", ",", 
       "0.499034`", ",", "0.418749`"}], "}"}], ",", 
     RowBox[{"{", 
      RowBox[{
      "0.22`", ",", "0.4`", ",", "0.93177`", ",", "0.99099`", ",", 
       "0.508949`", ",", "0.426758`"}], "}"}], ",", 
     RowBox[{"{", 
      RowBox[{
      "0.22`", ",", "0.425`", ",", "0.929554`", ",", "0.98967`", ",", 
       "0.517069`", ",", "0.433253`"}], "}"}], ",", 
     RowBox[{"{", 
      RowBox[{
      "0.22`", ",", "0.45`", ",", "0.927122`", ",", "0.989933`", ",", 
       "0.524191`", ",", "0.438406`"}], "}"}], ",", 
     RowBox[{"{", 
      RowBox[{
      "0.22`", ",", "0.475`", ",", "0.925617`", ",", "0.98919`", ",", 
       "0.532828`", ",", "0.446821`"}], "}"}], ",", 
     RowBox[{"{", 
      RowBox[{
      "0.22`", ",", "0.5`", ",", "0.92415`", ",", "0.988675`", ",", 
       "0.538916`", ",", "0.452216`"}], "}"}], ",", 
     RowBox[{"{", 
      RowBox[{
      "0.23`", ",", "0.`", ",", "0.956839`", ",", "0.992987`", ",", 
       "0.0306954`", ",", "0.022876`"}], "}"}], ",", 
     RowBox[{"{", 
      RowBox[{
      "0.23`", ",", "0.025`", ",", "0.98603`", ",", "0.9886`", ",", 
       "0.0970745`", ",", "0.0713929`"}], "}"}], ",", 
     RowBox[{"{", 
      RowBox[{
      "0.23`", ",", "0.05`", ",", "0.989345`", ",", "0.982687`", ",", 
       "0.186904`", ",", "0.156508`"}], "}"}], ",", 
     RowBox[{"{", 
      RowBox[{
      "0.23`", ",", "0.075`", ",", "0.985328`", ",", "0.974113`", ",", 
       "0.251201`", ",", "0.215703`"}], "}"}], ",", 
     RowBox[{"{", 
      RowBox[{
      "0.23`", ",", "0.1`", ",", "0.979904`", ",", "0.966829`", ",", 
       "0.299281`", ",", "0.25653`"}], "}"}], ",", 
     RowBox[{"{", 
      RowBox[{
      "0.23`", ",", "0.125`", ",", "0.974407`", ",", "0.963117`", ",", 
       "0.338612`", ",", "0.289781`"}], "}"}], ",", 
     RowBox[{"{", 
      RowBox[{
      "0.23`", ",", "0.15`", ",", "0.969182`", ",", "0.962396`", ",", 
       "0.367891`", ",", "0.315107`"}], "}"}], ",", 
     RowBox[{"{", 
      RowBox[{
      "0.23`", ",", "0.175`", ",", "0.964526`", ",", "0.963962`", ",", 
       "0.386344`", ",", "0.330699`"}], "}"}], ",", 
     RowBox[{"{", 
      RowBox[{
      "0.23`", ",", "0.2`", ",", "0.960727`", ",", "0.967317`", ",", 
       "0.407039`", ",", "0.348368`"}], "}"}], ",", 
     RowBox[{"{", 
      RowBox[{
      "0.23`", ",", "0.225`", ",", "0.956125`", ",", "0.970545`", ",", 
       "0.423497`", ",", "0.360985`"}], "}"}], ",", 
     RowBox[{"{", 
      RowBox[{
      "0.23`", ",", "0.25`", ",", "0.951524`", ",", "0.974282`", ",", 
       "0.437698`", ",", "0.372654`"}], "}"}], ",", 
     RowBox[{"{", 
      RowBox[{
      "0.23`", ",", "0.275`", ",", "0.948253`", ",", "0.978775`", ",", 
       "0.449848`", ",", "0.382568`"}], "}"}], ",", 
     RowBox[{"{", 
      RowBox[{
      "0.23`", ",", "0.3`", ",", "0.94469`", ",", "0.9843`", ",", "0.463896`",
        ",", "0.393213`"}], "}"}], ",", 
     RowBox[{"{", 
      RowBox[{
      "0.23`", ",", "0.325`", ",", "0.939647`", ",", "0.987405`", ",", 
       "0.474864`", ",", "0.400151`"}], "}"}], ",", 
     RowBox[{"{", 
      RowBox[{
      "0.23`", ",", "0.35`", ",", "0.937522`", ",", "0.990905`", ",", 
       "0.484665`", ",", "0.406911`"}], "}"}], ",", 
     RowBox[{"{", 
      RowBox[{
      "0.23`", ",", "0.375`", ",", "0.935306`", ",", "0.991055`", ",", 
       "0.499552`", ",", "0.420113`"}], "}"}], ",", 
     RowBox[{"{", 
      RowBox[{
      "0.23`", ",", "0.4`", ",", "0.932253`", ",", "0.991213`", ",", 
       "0.50827`", ",", "0.426194`"}], "}"}], ",", 
     RowBox[{"{", 
      RowBox[{
      "0.23`", ",", "0.425`", ",", "0.929457`", ",", "0.990046`", ",", 
       "0.517645`", ",", "0.433669`"}], "}"}], ",", 
     RowBox[{"{", 
      RowBox[{
      "0.23`", ",", "0.45`", ",", "0.926758`", ",", "0.989949`", ",", 
       "0.525745`", ",", "0.439935`"}], "}"}], ",", 
     RowBox[{"{", 
      RowBox[{
      "0.23`", ",", "0.475`", ",", "0.925348`", ",", "0.989084`", ",", 
       "0.5337`", ",", "0.447567`"}], "}"}], ",", 
     RowBox[{"{", 
      RowBox[{
      "0.23`", ",", "0.5`", ",", "0.923686`", ",", "0.988715`", ",", 
       "0.539773`", ",", "0.452638`"}], "}"}], ",", 
     RowBox[{"{", 
      RowBox[{
      "0.24`", ",", "0.`", ",", "0.949367`", ",", "0.991849`", ",", 
       "0.0328164`", ",", "0.0240417`"}], "}"}], ",", 
     RowBox[{"{", 
      RowBox[{
      "0.24`", ",", "0.025`", ",", "0.985482`", ",", "0.988145`", ",", 
       "0.0965335`", ",", "0.0708047`"}], "}"}], ",", 
     RowBox[{"{", 
      RowBox[{
      "0.24`", ",", "0.05`", ",", "0.989625`", ",", "0.98218`", ",", 
       "0.185484`", ",", "0.155438`"}], "}"}], ",", 
     RowBox[{"{", 
      RowBox[{
      "0.24`", ",", "0.075`", ",", "0.98582`", ",", "0.974724`", ",", 
       "0.24958`", ",", "0.213673`"}], "}"}], ",", 
     RowBox[{"{", 
      RowBox[{
      "0.24`", ",", "0.1`", ",", "0.979744`", ",", "0.967605`", ",", 
       "0.299022`", ",", "0.255821`"}], "}"}], ",", 
     RowBox[{"{", 
      RowBox[{
      "0.24`", ",", "0.125`", ",", "0.974546`", ",", "0.963245`", ",", 
       "0.33757`", ",", "0.289089`"}], "}"}], ",", 
     RowBox[{"{", 
      RowBox[{
      "0.24`", ",", "0.15`", ",", "0.970388`", ",", "0.961997`", ",", 
       "0.365917`", ",", "0.314373`"}], "}"}], ",", 
     RowBox[{"{", 
      RowBox[{
      "0.24`", ",", "0.175`", ",", "0.965738`", ",", "0.96351`", ",", 
       "0.387001`", ",", "0.331765`"}], "}"}], ",", 
     RowBox[{"{", 
      RowBox[{
      "0.24`", ",", "0.2`", ",", "0.960723`", ",", "0.967138`", ",", 
       "0.407204`", ",", "0.348362`"}], "}"}], ",", 
     RowBox[{"{", 
      RowBox[{
      "0.24`", ",", "0.225`", ",", "0.955948`", ",", "0.969697`", ",", 
       "0.422036`", ",", "0.360269`"}], "}"}], ",", 
     RowBox[{"{", 
      RowBox[{
      "0.24`", ",", "0.25`", ",", "0.952439`", ",", "0.974113`", ",", 
       "0.435677`", ",", "0.371218`"}], "}"}], ",", 
     RowBox[{"{", 
      RowBox[{
      "0.24`", ",", "0.275`", ",", "0.948061`", ",", "0.978001`", ",", 
       "0.450251`", ",", "0.382575`"}], "}"}], ",", 
     RowBox[{"{", 
      RowBox[{
      "0.24`", ",", "0.3`", ",", "0.944722`", ",", "0.98387`", ",", 
       "0.462101`", ",", "0.391834`"}], "}"}], ",", 
     RowBox[{"{", 
      RowBox[{
      "0.24`", ",", "0.325`", ",", "0.940321`", ",", "0.987906`", ",", 
       "0.471907`", ",", "0.397088`"}], "}"}], ",", 
     RowBox[{"{", 
      RowBox[{
      "0.24`", ",", "0.35`", ",", "0.938125`", ",", "0.990889`", ",", 
       "0.486421`", ",", "0.409889`"}], "}"}], ",", 
     RowBox[{"{", 
      RowBox[{
      "0.24`", ",", "0.375`", ",", "0.934264`", ",", "0.990339`", ",", 
       "0.498281`", ",", "0.418558`"}], "}"}], ",", 
     RowBox[{"{", 
      RowBox[{
      "0.24`", ",", "0.4`", ",", "0.932457`", ",", "0.991511`", ",", 
       "0.507602`", ",", "0.425571`"}], "}"}], ",", 
     RowBox[{"{", 
      RowBox[{
      "0.24`", ",", "0.425`", ",", "0.929476`", ",", "0.989944`", ",", 
       "0.517703`", ",", "0.4342`"}], "}"}], ",", 
     RowBox[{"{", 
      RowBox[{
      "0.24`", ",", "0.45`", ",", "0.927565`", ",", "0.989648`", ",", 
       "0.525917`", ",", "0.440587`"}], "}"}], ",", 
     RowBox[{"{", 
      RowBox[{
      "0.24`", ",", "0.475`", ",", "0.925367`", ",", "0.989031`", ",", 
       "0.53362`", ",", "0.447212`"}], "}"}], ",", 
     RowBox[{"{", 
      RowBox[{
      "0.24`", ",", "0.5`", ",", "0.923535`", ",", "0.988664`", ",", 
       "0.538527`", ",", "0.451351`"}], "}"}], ",", 
     RowBox[{"{", 
      RowBox[{
      "0.25`", ",", "0.`", ",", "0.95096`", ",", "0.991656`", ",", 
       "0.0353204`", ",", "0.0265552`"}], "}"}], ",", 
     RowBox[{"{", 
      RowBox[{
      "0.25`", ",", "0.025`", ",", "0.985516`", ",", "0.988255`", ",", 
       "0.0962245`", ",", "0.070888`"}], "}"}], ",", 
     RowBox[{"{", 
      RowBox[{
      "0.25`", ",", "0.05`", ",", "0.989976`", ",", "0.982401`", ",", 
       "0.185026`", ",", "0.155309`"}], "}"}], ",", 
     RowBox[{"{", 
      RowBox[{
      "0.25`", ",", "0.075`", ",", "0.98576`", ",", "0.975028`", ",", 
       "0.250074`", ",", "0.214159`"}], "}"}], ",", 
     RowBox[{"{", 
      RowBox[{
      "0.25`", ",", "0.1`", ",", "0.98052`", ",", "0.967927`", ",", 
       "0.300996`", ",", "0.257805`"}], "}"}], ",", 
     RowBox[{"{", 
      RowBox[{
      "0.25`", ",", "0.125`", ",", "0.975165`", ",", "0.96294`", ",", 
       "0.339386`", ",", "0.291364`"}], "}"}], ",", 
     RowBox[{"{", 
      RowBox[{
      "0.25`", ",", "0.15`", ",", "0.970138`", ",", "0.961976`", ",", 
       "0.36776`", ",", "0.315727`"}], "}"}], ",", 
     RowBox[{"{", 
      RowBox[{
      "0.25`", ",", "0.175`", ",", "0.964914`", ",", "0.963185`", ",", 
       "0.387573`", ",", "0.331668`"}], "}"}], ",", 
     RowBox[{"{", 
      RowBox[{
      "0.25`", ",", "0.2`", ",", "0.960634`", ",", "0.966037`", ",", 
       "0.404443`", ",", "0.34566`"}], "}"}], ",", 
     RowBox[{"{", 
      RowBox[{
      "0.25`", ",", "0.225`", ",", "0.956205`", ",", "0.969036`", ",", 
       "0.42199`", ",", "0.36059`"}], "}"}], ",", 
     RowBox[{"{", 
      RowBox[{
      "0.25`", ",", "0.25`", ",", "0.95247`", ",", "0.973521`", ",", 
       "0.433265`", ",", "0.368715`"}], "}"}], ",", 
     RowBox[{"{", 
      RowBox[{
      "0.25`", ",", "0.275`", ",", "0.949172`", ",", "0.978279`", ",", 
       "0.448489`", ",", "0.381526`"}], "}"}], ",", 
     RowBox[{"{", 
      RowBox[{
      "0.25`", ",", "0.3`", ",", "0.944672`", ",", "0.983455`", ",", 
       "0.462625`", ",", "0.391692`"}], "}"}], ",", 
     RowBox[{"{", 
      RowBox[{
      "0.25`", ",", "0.325`", ",", "0.940543`", ",", "0.987912`", ",", 
       "0.472906`", ",", "0.398565`"}], "}"}], ",", 
     RowBox[{"{", 
      RowBox[{
      "0.25`", ",", "0.35`", ",", "0.937651`", ",", "0.990415`", ",", 
       "0.486007`", ",", "0.408981`"}], "}"}], ",", 
     RowBox[{"{", 
      RowBox[{
      "0.25`", ",", "0.375`", ",", "0.934292`", ",", "0.990211`", ",", 
       "0.496327`", ",", "0.415686`"}], "}"}], ",", 
     RowBox[{"{", 
      RowBox[{
      "0.25`", ",", "0.4`", ",", "0.93212`", ",", "0.991519`", ",", 
       "0.507394`", ",", "0.425578`"}], "}"}], ",", 
     RowBox[{"{", 
      RowBox[{
      "0.25`", ",", "0.425`", ",", "0.93056`", ",", "0.990166`", ",", 
       "0.515911`", ",", "0.433071`"}], "}"}], ",", 
     RowBox[{"{", 
      RowBox[{
      "0.25`", ",", "0.45`", ",", "0.927198`", ",", "0.989735`", ",", 
       "0.522175`", ",", "0.436477`"}], "}"}], ",", 
     RowBox[{"{", 
      RowBox[{
      "0.25`", ",", "0.475`", ",", "0.925875`", ",", "0.988882`", ",", 
       "0.531703`", ",", "0.445644`"}], "}"}], ",", 
     RowBox[{"{", 
      RowBox[{
      "0.25`", ",", "0.5`", ",", "0.923911`", ",", "0.988253`", ",", 
       "0.536768`", ",", "0.449913`"}], "}"}], ",", 
     RowBox[{"{", 
      RowBox[{
      "0.26`", ",", "0.`", ",", "0.95143`", ",", "0.991666`", ",", 
       "0.0360576`", ",", "0.0276358`"}], "}"}], ",", 
     RowBox[{"{", 
      RowBox[{
      "0.26`", ",", "0.025`", ",", "0.985708`", ",", "0.988402`", ",", 
       "0.0964162`", ",", "0.0710842`"}], "}"}], ",", 
     RowBox[{"{", 
      RowBox[{
      "0.26`", ",", "0.05`", ",", "0.98918`", ",", "0.982536`", ",", 
       "0.185751`", ",", "0.155251`"}], "}"}], ",", 
     RowBox[{"{", 
      RowBox[{
      "0.26`", ",", "0.075`", ",", "0.985599`", ",", "0.975334`", ",", 
       "0.250159`", ",", "0.213847`"}], "}"}], ",", 
     RowBox[{"{", 
      RowBox[{
      "0.26`", ",", "0.1`", ",", "0.979871`", ",", "0.968158`", ",", 
       "0.30032`", ",", "0.256952`"}], "}"}], ",", 
     RowBox[{"{", 
      RowBox[{
      "0.26`", ",", "0.125`", ",", "0.975252`", ",", "0.963466`", ",", 
       "0.338956`", ",", "0.290679`"}], "}"}], ",", 
     RowBox[{"{", 
      RowBox[{
      "0.26`", ",", "0.15`", ",", "0.970768`", ",", "0.961577`", ",", 
       "0.36737`", ",", "0.315366`"}], "}"}], ",", 
     RowBox[{"{", 
      RowBox[{
      "0.26`", ",", "0.175`", ",", "0.966072`", ",", "0.96318`", ",", 
       "0.388364`", ",", "0.333531`"}], "}"}], ",", 
     RowBox[{"{", 
      RowBox[{
      "0.26`", ",", "0.2`", ",", "0.961458`", ",", "0.966288`", ",", 
       "0.407316`", ",", "0.34969`"}], "}"}], ",", 
     RowBox[{"{", 
      RowBox[{
      "0.26`", ",", "0.225`", ",", "0.956558`", ",", "0.969257`", ",", 
       "0.424377`", ",", "0.363084`"}], "}"}], ",", 
     RowBox[{"{", 
      RowBox[{
      "0.26`", ",", "0.25`", ",", "0.951967`", ",", "0.972452`", ",", 
       "0.435317`", ",", "0.370667`"}], "}"}], ",", 
     RowBox[{"{", 
      RowBox[{
      "0.26`", ",", "0.275`", ",", "0.949121`", ",", "0.977287`", ",", 
       "0.450611`", ",", "0.383543`"}], "}"}], ",", 
     RowBox[{"{", 
      RowBox[{
      "0.26`", ",", "0.3`", ",", "0.944793`", ",", "0.982555`", ",", 
       "0.461775`", ",", "0.391545`"}], "}"}], ",", 
     RowBox[{"{", 
      RowBox[{
      "0.26`", ",", "0.325`", ",", "0.941173`", ",", "0.987549`", ",", 
       "0.472033`", ",", "0.398242`"}], "}"}], ",", 
     RowBox[{"{", 
      RowBox[{
      "0.26`", ",", "0.35`", ",", "0.937611`", ",", "0.989741`", ",", 
       "0.486071`", ",", "0.409226`"}], "}"}], ",", 
     RowBox[{"{", 
      RowBox[{
      "0.26`", ",", "0.375`", ",", "0.935443`", ",", "0.990846`", ",", 
       "0.4969`", ",", "0.418248`"}], "}"}], ",", 
     RowBox[{"{", 
      RowBox[{
      "0.26`", ",", "0.4`", ",", "0.932788`", ",", "0.991277`", ",", 
       "0.507402`", ",", "0.426325`"}], "}"}], ",", 
     RowBox[{"{", 
      RowBox[{
      "0.26`", ",", "0.425`", ",", "0.929838`", ",", "0.990402`", ",", 
       "0.515123`", ",", "0.431172`"}], "}"}], ",", 
     RowBox[{"{", 
      RowBox[{
      "0.26`", ",", "0.45`", ",", "0.927776`", ",", "0.990063`", ",", 
       "0.5239`", ",", "0.438953`"}], "}"}], ",", 
     RowBox[{"{", 
      RowBox[{
      "0.26`", ",", "0.475`", ",", "0.926511`", ",", "0.989559`", ",", 
       "0.533041`", ",", "0.447824`"}], "}"}], ",", 
     RowBox[{"{", 
      RowBox[{
      "0.26`", ",", "0.5`", ",", "0.924847`", ",", "0.988769`", ",", 
       "0.540306`", ",", "0.454082`"}], "}"}], ",", 
     RowBox[{"{", 
      RowBox[{
      "0.27`", ",", "0.`", ",", "0.948708`", ",", "0.992239`", ",", 
       "0.039051`", ",", "0.0290108`"}], "}"}], ",", 
     RowBox[{"{", 
      RowBox[{
      "0.27`", ",", "0.025`", ",", "0.98574`", ",", "0.9886`", ",", 
       "0.0951617`", ",", "0.0694209`"}], "}"}], ",", 
     RowBox[{"{", 
      RowBox[{
      "0.27`", ",", "0.05`", ",", "0.988702`", ",", "0.983027`", ",", 
       "0.186413`", ",", "0.155804`"}], "}"}], ",", 
     RowBox[{"{", 
      RowBox[{
      "0.27`", ",", "0.075`", ",", "0.985957`", ",", "0.976006`", ",", 
       "0.251146`", ",", "0.214993`"}], "}"}], ",", 
     RowBox[{"{", 
      RowBox[{
      "0.27`", ",", "0.1`", ",", "0.980839`", ",", "0.968624`", ",", 
       "0.300314`", ",", "0.257593`"}], "}"}], ",", 
     RowBox[{"{", 
      RowBox[{
      "0.27`", ",", "0.125`", ",", "0.974866`", ",", "0.964144`", ",", 
       "0.340663`", ",", "0.291782`"}], "}"}], ",", 
     RowBox[{"{", 
      RowBox[{
      "0.27`", ",", "0.15`", ",", "0.970458`", ",", "0.961289`", ",", 
       "0.367194`", ",", "0.314759`"}], "}"}], ",", 
     RowBox[{"{", 
      RowBox[{
      "0.27`", ",", "0.175`", ",", "0.966113`", ",", "0.962688`", ",", 
       "0.387125`", ",", "0.331992`"}], "}"}], ",", 
     RowBox[{"{", 
      RowBox[{
      "0.27`", ",", "0.2`", ",", "0.961444`", ",", "0.966153`", ",", 
       "0.406733`", ",", "0.348759`"}], "}"}], ",", 
     RowBox[{"{", 
      RowBox[{
      "0.27`", ",", "0.225`", ",", "0.95696`", ",", "0.968658`", ",", 
       "0.422957`", ",", "0.362014`"}], "}"}], ",", 
     RowBox[{"{", 
      RowBox[{
      "0.27`", ",", "0.25`", ",", "0.952904`", ",", "0.97324`", ",", 
       "0.43615`", ",", "0.372486`"}], "}"}], ",", 
     RowBox[{"{", 
      RowBox[{
      "0.27`", ",", "0.275`", ",", "0.950208`", ",", "0.977571`", ",", 
       "0.447841`", ",", "0.381913`"}], "}"}], ",", 
     RowBox[{"{", 
      RowBox[{
      "0.27`", ",", "0.3`", ",", "0.944578`", ",", "0.981645`", ",", 
       "0.460178`", ",", "0.3899`"}], "}"}], ",", 
     RowBox[{"{", 
      RowBox[{
      "0.27`", ",", "0.325`", ",", "0.942127`", ",", "0.986497`", ",", 
       "0.4742`", ",", "0.401677`"}], "}"}], ",", 
     RowBox[{"{", 
      RowBox[{
      "0.27`", ",", "0.35`", ",", "0.937556`", ",", "0.989476`", ",", 
       "0.48617`", ",", "0.409295`"}], "}"}], ",", 
     RowBox[{"{", 
      RowBox[{
      "0.27`", ",", "0.375`", ",", "0.935256`", ",", "0.990636`", ",", 
       "0.495984`", ",", "0.41667`"}], "}"}], ",", 
     RowBox[{"{", 
      RowBox[{
      "0.27`", ",", "0.4`", ",", "0.93239`", ",", "0.990895`", ",", 
       "0.507181`", ",", "0.42549`"}], "}"}], ",", 
     RowBox[{"{", 
      RowBox[{
      "0.27`", ",", "0.425`", ",", "0.930064`", ",", "0.99013`", ",", 
       "0.51848`", ",", "0.43565`"}], "}"}], ",", 
     RowBox[{"{", 
      RowBox[{
      "0.27`", ",", "0.45`", ",", "0.928504`", ",", "0.9898`", ",", 
       "0.524944`", ",", "0.440564`"}], "}"}], ",", 
     RowBox[{"{", 
      RowBox[{
      "0.27`", ",", "0.475`", ",", "0.926844`", ",", "0.98915`", ",", 
       "0.531185`", ",", "0.44589`"}], "}"}], ",", 
     RowBox[{"{", 
      RowBox[{
      "0.27`", ",", "0.5`", ",", "0.924106`", ",", "0.988657`", ",", 
       "0.538075`", ",", "0.451318`"}], "}"}], ",", 
     RowBox[{"{", 
      RowBox[{
      "0.28`", ",", "0.`", ",", "0.95919`", ",", "0.993625`", ",", 
       "0.0400939`", ",", "0.030139`"}], "}"}], ",", 
     RowBox[{"{", 
      RowBox[{
      "0.28`", ",", "0.025`", ",", "0.985246`", ",", "0.988699`", ",", 
       "0.0963349`", ",", "0.0707594`"}], "}"}], ",", 
     RowBox[{"{", 
      RowBox[{
      "0.28`", ",", "0.05`", ",", "0.988491`", ",", "0.9834`", ",", 
       "0.186052`", ",", "0.155652`"}], "}"}], ",", 
     RowBox[{"{", 
      RowBox[{
      "0.28`", ",", "0.075`", ",", "0.985656`", ",", "0.976156`", ",", 
       "0.249186`", ",", "0.21275`"}], "}"}], ",", 
     RowBox[{"{", 
      RowBox[{
      "0.28`", ",", "0.1`", ",", "0.981112`", ",", "0.967787`", ",", 
       "0.302853`", ",", "0.260001`"}], "}"}], ",", 
     RowBox[{"{", 
      RowBox[{
      "0.28`", ",", "0.125`", ",", "0.975283`", ",", "0.963572`", ",", 
       "0.341723`", ",", "0.292809`"}], "}"}], ",", 
     RowBox[{"{", 
      RowBox[{
      "0.28`", ",", "0.15`", ",", "0.970628`", ",", "0.961338`", ",", 
       "0.366536`", ",", "0.314198`"}], "}"}], ",", 
     RowBox[{"{", 
      RowBox[{
      "0.28`", ",", "0.175`", ",", "0.965946`", ",", "0.962345`", ",", 
       "0.387523`", ",", "0.332018`"}], "}"}], ",", 
     RowBox[{"{", 
      RowBox[{
      "0.28`", ",", "0.2`", ",", "0.960892`", ",", "0.964956`", ",", 
       "0.405788`", ",", "0.34751`"}], "}"}], ",", 
     RowBox[{"{", 
      RowBox[{
      "0.28`", ",", "0.225`", ",", "0.957243`", ",", "0.968107`", ",", 
       "0.421261`", ",", "0.360913`"}], "}"}], ",", 
     RowBox[{"{", 
      RowBox[{
      "0.28`", ",", "0.25`", ",", "0.9529`", ",", "0.972619`", ",", 
       "0.436452`", ",", "0.372495`"}], "}"}], ",", 
     RowBox[{"{", 
      RowBox[{
      "0.28`", ",", "0.275`", ",", "0.949446`", ",", "0.976796`", ",", 
       "0.449467`", ",", "0.38275`"}], "}"}], ",", 
     RowBox[{"{", 
      RowBox[{
      "0.28`", ",", "0.3`", ",", "0.945692`", ",", "0.980751`", ",", 
       "0.461082`", ",", "0.391932`"}], "}"}], ",", 
     RowBox[{"{", 
      RowBox[{
      "0.28`", ",", "0.325`", ",", "0.941975`", ",", "0.986098`", ",", 
       "0.472153`", ",", "0.399796`"}], "}"}], ",", 
     RowBox[{"{", 
      RowBox[{
      "0.28`", ",", "0.35`", ",", "0.939658`", ",", "0.990127`", ",", 
       "0.484759`", ",", "0.409797`"}], "}"}], ",", 
     RowBox[{"{", 
      RowBox[{
      "0.28`", ",", "0.375`", ",", "0.935702`", ",", "0.990383`", ",", 
       "0.495812`", ",", "0.417255`"}], "}"}], ",", 
     RowBox[{"{", 
      RowBox[{
      "0.28`", ",", "0.4`", ",", "0.932724`", ",", "0.99085`", ",", 
       "0.506959`", ",", "0.425923`"}], "}"}], ",", 
     RowBox[{"{", 
      RowBox[{
      "0.28`", ",", "0.425`", ",", "0.930592`", ",", "0.990362`", ",", 
       "0.512747`", ",", "0.430223`"}], "}"}], ",", 
     RowBox[{"{", 
      RowBox[{
      "0.28`", ",", "0.45`", ",", "0.928189`", ",", "0.989693`", ",", 
       "0.523433`", ",", "0.43916`"}], "}"}], ",", 
     RowBox[{"{", 
      RowBox[{
      "0.28`", ",", "0.475`", ",", "0.92719`", ",", "0.989317`", ",", 
       "0.529141`", ",", "0.444857`"}], "}"}], ",", 
     RowBox[{"{", 
      RowBox[{
      "0.28`", ",", "0.5`", ",", "0.925216`", ",", "0.988838`", ",", 
       "0.536052`", ",", "0.45018`"}], "}"}], ",", 
     RowBox[{"{", 
      RowBox[{
      "0.29`", ",", "0.`", ",", "0.962398`", ",", "0.994911`", ",", 
       "0.0432192`", ",", "0.0325787`"}], "}"}], ",", 
     RowBox[{"{", 
      RowBox[{
      "0.29`", ",", "0.025`", ",", "0.985251`", ",", "0.988809`", ",", 
       "0.0967295`", ",", "0.0713768`"}], "}"}], ",", 
     RowBox[{"{", 
      RowBox[{
      "0.29`", ",", "0.05`", ",", "0.988375`", ",", "0.983511`", ",", 
       "0.186861`", ",", "0.156313`"}], "}"}], ",", 
     RowBox[{"{", 
      RowBox[{
      "0.29`", ",", "0.075`", ",", "0.985339`", ",", "0.977007`", ",", 
       "0.249599`", ",", "0.213094`"}], "}"}], ",", 
     RowBox[{"{", 
      RowBox[{
      "0.29`", ",", "0.1`", ",", "0.981029`", ",", "0.968007`", ",", 
       "0.301629`", ",", "0.258668`"}], "}"}], ",", 
     RowBox[{"{", 
      RowBox[{
      "0.29`", ",", "0.125`", ",", "0.975588`", ",", "0.963019`", ",", 
       "0.341697`", ",", "0.292766`"}], "}"}], ",", 
     RowBox[{"{", 
      RowBox[{
      "0.29`", ",", "0.15`", ",", "0.97091`", ",", "0.96125`", ",", 
       "0.367913`", ",", "0.315532`"}], "}"}], ",", 
     RowBox[{"{", 
      RowBox[{
      "0.29`", ",", "0.175`", ",", "0.966182`", ",", "0.962431`", ",", 
       "0.389678`", ",", "0.334126`"}], "}"}], ",", 
     RowBox[{"{", 
      RowBox[{
      "0.29`", ",", "0.2`", ",", "0.961646`", ",", "0.964958`", ",", 
       "0.406337`", ",", "0.348752`"}], "}"}], ",", 
     RowBox[{"{", 
      RowBox[{
      "0.29`", ",", "0.225`", ",", "0.958181`", ",", "0.968216`", ",", 
       "0.423018`", ",", "0.36252`"}], "}"}], ",", 
     RowBox[{"{", 
      RowBox[{
      "0.29`", ",", "0.25`", ",", "0.95353`", ",", "0.971596`", ",", 
       "0.434378`", ",", "0.370818`"}], "}"}], ",", 
     RowBox[{"{", 
      RowBox[{
      "0.29`", ",", "0.275`", ",", "0.950094`", ",", "0.976244`", ",", 
       "0.450404`", ",", "0.384911`"}], "}"}], ",", 
     RowBox[{"{", 
      RowBox[{
      "0.29`", ",", "0.3`", ",", "0.945647`", ",", "0.980342`", ",", 
       "0.461964`", ",", "0.392607`"}], "}"}], ",", 
     RowBox[{"{", 
      RowBox[{
      "0.29`", ",", "0.325`", ",", "0.94258`", ",", "0.985443`", ",", 
       "0.474553`", ",", "0.402825`"}], "}"}], ",", 
     RowBox[{"{", 
      RowBox[{
      "0.29`", ",", "0.35`", ",", "0.939398`", ",", "0.988652`", ",", 
       "0.484786`", ",", "0.409898`"}], "}"}], ",", 
     RowBox[{"{", 
      RowBox[{
      "0.29`", ",", "0.375`", ",", "0.936735`", ",", "0.990859`", ",", 
       "0.494624`", ",", "0.41682`"}], "}"}], ",", 
     RowBox[{"{", 
      RowBox[{
      "0.29`", ",", "0.4`", ",", "0.933379`", ",", "0.990886`", ",", 
       "0.504804`", ",", "0.423712`"}], "}"}], ",", 
     RowBox[{"{", 
      RowBox[{
      "0.29`", ",", "0.425`", ",", "0.931599`", ",", "0.990422`", ",", 
       "0.515872`", ",", "0.433789`"}], "}"}], ",", 
     RowBox[{"{", 
      RowBox[{
      "0.29`", ",", "0.45`", ",", "0.92868`", ",", "0.989502`", ",", 
       "0.524028`", ",", "0.439854`"}], "}"}], ",", 
     RowBox[{"{", 
      RowBox[{
      "0.29`", ",", "0.475`", ",", "0.926739`", ",", "0.988696`", ",", 
       "0.528846`", ",", "0.44425`"}], "}"}], ",", 
     RowBox[{"{", 
      RowBox[{
      "0.29`", ",", "0.5`", ",", "0.924531`", ",", "0.988693`", ",", 
       "0.538097`", ",", "0.451634`"}], "}"}], ",", 
     RowBox[{"{", 
      RowBox[{
      "0.3`", ",", "0.`", ",", "0.947975`", ",", "0.992091`", ",", 
       "0.0462324`", ",", "0.0361826`"}], "}"}], ",", 
     RowBox[{"{", 
      RowBox[{
      "0.3`", ",", "0.025`", ",", "0.984771`", ",", "0.988677`", ",", 
       "0.0978774`", ",", "0.0724142`"}], "}"}], ",", 
     RowBox[{"{", 
      RowBox[{
      "0.3`", ",", "0.05`", ",", "0.988044`", ",", "0.983595`", ",", 
       "0.186902`", ",", "0.156681`"}], "}"}], ",", 
     RowBox[{"{", 
      RowBox[{
      "0.3`", ",", "0.075`", ",", "0.985562`", ",", "0.977208`", ",", 
       "0.249764`", ",", "0.21287`"}], "}"}], ",", 
     RowBox[{"{", 
      RowBox[{
      "0.3`", ",", "0.1`", ",", "0.980302`", ",", "0.966886`", ",", 
       "0.302925`", ",", "0.25909`"}], "}"}], ",", 
     RowBox[{"{", 
      RowBox[{
      "0.3`", ",", "0.125`", ",", "0.97574`", ",", "0.96292`", ",", 
       "0.341289`", ",", "0.292691`"}], "}"}], ",", 
     RowBox[{"{", 
      RowBox[{
      "0.3`", ",", "0.15`", ",", "0.971086`", ",", "0.960406`", ",", 
       "0.368149`", ",", "0.316162`"}], "}"}], ",", 
     RowBox[{"{", 
      RowBox[{
      "0.3`", ",", "0.175`", ",", "0.966845`", ",", "0.962097`", ",", 
       "0.389363`", ",", "0.334603`"}], "}"}], ",", 
     RowBox[{"{", 
      RowBox[{
      "0.3`", ",", "0.2`", ",", "0.962071`", ",", "0.964578`", ",", 
       "0.40418`", ",", "0.346654`"}], "}"}], ",", 
     RowBox[{"{", 
      RowBox[{
      "0.3`", ",", "0.225`", ",", "0.957614`", ",", "0.967598`", ",", 
       "0.421742`", ",", "0.361291`"}], "}"}], ",", 
     RowBox[{"{", 
      RowBox[{
      "0.3`", ",", "0.25`", ",", "0.953577`", ",", "0.971398`", ",", 
       "0.43454`", ",", "0.371612`"}], "}"}], ",", 
     RowBox[{"{", 
      RowBox[{
      "0.3`", ",", "0.275`", ",", "0.949753`", ",", "0.975994`", ",", 
       "0.450069`", ",", "0.384049`"}], "}"}], ",", 
     RowBox[{"{", 
      RowBox[{
      "0.3`", ",", "0.3`", ",", "0.94595`", ",", "0.98087`", ",", "0.460346`",
        ",", "0.391633`"}], "}"}], ",", 
     RowBox[{"{", 
      RowBox[{
      "0.3`", ",", "0.325`", ",", "0.942811`", ",", "0.98518`", ",", 
       "0.472501`", ",", "0.400812`"}], "}"}], ",", 
     RowBox[{"{", 
      RowBox[{
      "0.3`", ",", "0.35`", ",", "0.939257`", ",", "0.987994`", ",", 
       "0.481975`", ",", "0.406979`"}], "}"}], ",", 
     RowBox[{"{", 
      RowBox[{
      "0.3`", ",", "0.375`", ",", "0.935861`", ",", "0.990216`", ",", 
       "0.494325`", ",", "0.41624`"}], "}"}], ",", 
     RowBox[{"{", 
      RowBox[{
      "0.3`", ",", "0.4`", ",", "0.933357`", ",", "0.99089`", ",", 
       "0.505927`", ",", "0.425678`"}], "}"}], ",", 
     RowBox[{"{", 
      RowBox[{
      "0.3`", ",", "0.425`", ",", "0.930969`", ",", "0.990544`", ",", 
       "0.5128`", ",", "0.429928`"}], "}"}], ",", 
     RowBox[{"{", 
      RowBox[{
      "0.3`", ",", "0.45`", ",", "0.92868`", ",", "0.989884`", ",", 
       "0.524401`", ",", "0.44007`"}], "}"}], ",", 
     RowBox[{"{", 
      RowBox[{
      "0.3`", ",", "0.475`", ",", "0.926829`", ",", "0.988833`", ",", 
       "0.529737`", ",", "0.444696`"}], "}"}], ",", 
     RowBox[{"{", 
      RowBox[{
      "0.3`", ",", "0.5`", ",", "0.925359`", ",", "0.988773`", ",", 
       "0.539121`", ",", "0.453119`"}], "}"}], ",", 
     RowBox[{"{", 
      RowBox[{
      "0.31`", ",", "0.`", ",", "0.947805`", ",", "0.992579`", ",", 
       "0.0485514`", ",", "0.0379185`"}], "}"}], ",", 
     RowBox[{"{", 
      RowBox[{
      "0.31`", ",", "0.025`", ",", "0.984628`", ",", "0.988746`", ",", 
       "0.0997904`", ",", "0.0738716`"}], "}"}], ",", 
     RowBox[{"{", 
      RowBox[{
      "0.31`", ",", "0.05`", ",", "0.988095`", ",", "0.983359`", ",", 
       "0.18857`", ",", "0.158223`"}], "}"}], ",", 
     RowBox[{"{", 
      RowBox[{
      "0.31`", ",", "0.075`", ",", "0.985121`", ",", "0.976652`", ",", 
       "0.251876`", ",", "0.214998`"}], "}"}], ",", 
     RowBox[{"{", 
      RowBox[{
      "0.31`", ",", "0.1`", ",", "0.980525`", ",", "0.966255`", ",", 
       "0.301544`", ",", "0.257445`"}], "}"}], ",", 
     RowBox[{"{", 
      RowBox[{
      "0.31`", ",", "0.125`", ",", "0.976294`", ",", "0.961859`", ",", 
       "0.342462`", ",", "0.293323`"}], "}"}], ",", 
     RowBox[{"{", 
      RowBox[{
      "0.31`", ",", "0.15`", ",", "0.971353`", ",", "0.960335`", ",", 
       "0.369681`", ",", "0.317369`"}], "}"}], ",", 
     RowBox[{"{", 
      RowBox[{
      "0.31`", ",", "0.175`", ",", "0.966752`", ",", "0.961762`", ",", 
       "0.388987`", ",", "0.334143`"}], "}"}], ",", 
     RowBox[{"{", 
      RowBox[{
      "0.31`", ",", "0.2`", ",", "0.962233`", ",", "0.964599`", ",", 
       "0.404648`", ",", "0.346562`"}], "}"}], ",", 
     RowBox[{"{", 
      RowBox[{
      "0.31`", ",", "0.225`", ",", "0.957696`", ",", "0.967622`", ",", 
       "0.423384`", ",", "0.362999`"}], "}"}], ",", 
     RowBox[{"{", 
      RowBox[{
      "0.31`", ",", "0.25`", ",", "0.953758`", ",", "0.970793`", ",", 
       "0.434853`", ",", "0.371818`"}], "}"}], ",", 
     RowBox[{"{", 
      RowBox[{
      "0.31`", ",", "0.275`", ",", "0.949605`", ",", "0.975281`", ",", 
       "0.446716`", ",", "0.380545`"}], "}"}], ",", 
     RowBox[{"{", 
      RowBox[{
      "0.31`", ",", "0.3`", ",", "0.946348`", ",", "0.979919`", ",", 
       "0.458919`", ",", "0.390678`"}], "}"}], ",", 
     RowBox[{"{", 
      RowBox[{
      "0.31`", ",", "0.325`", ",", "0.943266`", ",", "0.984654`", ",", 
       "0.472803`", ",", "0.401289`"}], "}"}], ",", 
     RowBox[{"{", 
      RowBox[{
      "0.31`", ",", "0.35`", ",", "0.940386`", ",", "0.989006`", ",", 
       "0.483198`", ",", "0.409018`"}], "}"}], ",", 
     RowBox[{"{", 
      RowBox[{
      "0.31`", ",", "0.375`", ",", "0.936469`", ",", "0.990557`", ",", 
       "0.494065`", ",", "0.41654`"}], "}"}], ",", 
     RowBox[{"{", 
      RowBox[{
      "0.31`", ",", "0.4`", ",", "0.932833`", ",", "0.991113`", ",", 
       "0.505905`", ",", "0.424954`"}], "}"}], ",", 
     RowBox[{"{", 
      RowBox[{
      "0.31`", ",", "0.425`", ",", "0.930778`", ",", "0.990166`", ",", 
       "0.516284`", ",", "0.433604`"}], "}"}], ",", 
     RowBox[{"{", 
      RowBox[{
      "0.31`", ",", "0.45`", ",", "0.929268`", ",", "0.990109`", ",", 
       "0.520575`", ",", "0.436602`"}], "}"}], ",", 
     RowBox[{"{", 
      RowBox[{
      "0.31`", ",", "0.475`", ",", "0.927462`", ",", "0.989273`", ",", 
       "0.529653`", ",", "0.445295`"}], "}"}], ",", 
     RowBox[{"{", 
      RowBox[{
      "0.31`", ",", "0.5`", ",", "0.925557`", ",", "0.98875`", ",", 
       "0.535918`", ",", "0.450759`"}], "}"}], ",", 
     RowBox[{"{", 
      RowBox[{
      "0.32`", ",", "0.`", ",", "0.957754`", ",", "0.993092`", ",", 
       "0.0476768`", ",", "0.0384139`"}], "}"}], ",", 
     RowBox[{"{", 
      RowBox[{
      "0.32`", ",", "0.025`", ",", "0.984752`", ",", "0.988938`", ",", 
       "0.100954`", ",", "0.0750082`"}], "}"}], ",", 
     RowBox[{"{", 
      RowBox[{
      "0.32`", ",", "0.05`", ",", "0.988662`", ",", "0.982977`", ",", 
       "0.189516`", ",", "0.159155`"}], "}"}], ",", 
     RowBox[{"{", 
      RowBox[{
      "0.32`", ",", "0.075`", ",", "0.985408`", ",", "0.977168`", ",", 
       "0.252199`", ",", "0.215203`"}], "}"}], ",", 
     RowBox[{"{", 
      RowBox[{
      "0.32`", ",", "0.1`", ",", "0.980479`", ",", "0.965592`", ",", 
       "0.304559`", ",", "0.260275`"}], "}"}], ",", 
     RowBox[{"{", 
      RowBox[{
      "0.32`", ",", "0.125`", ",", "0.976356`", ",", "0.961859`", ",", 
       "0.342108`", ",", "0.29331`"}], "}"}], ",", 
     RowBox[{"{", 
      RowBox[{
      "0.32`", ",", "0.15`", ",", "0.971244`", ",", "0.960093`", ",", 
       "0.36852`", ",", "0.316824`"}], "}"}], ",", 
     RowBox[{"{", 
      RowBox[{
      "0.32`", ",", "0.175`", ",", "0.967028`", ",", "0.961848`", ",", 
       "0.388842`", ",", "0.333932`"}], "}"}], ",", 
     RowBox[{"{", 
      RowBox[{
      "0.32`", ",", "0.2`", ",", "0.962078`", ",", "0.963881`", ",", 
       "0.405937`", ",", "0.34869`"}], "}"}], ",", 
     RowBox[{"{", 
      RowBox[{
      "0.32`", ",", "0.225`", ",", "0.958857`", ",", "0.966707`", ",", 
       "0.418436`", ",", "0.358671`"}], "}"}], ",", 
     RowBox[{"{", 
      RowBox[{
      "0.32`", ",", "0.25`", ",", "0.954727`", ",", "0.970623`", ",", 
       "0.434983`", ",", "0.372952`"}], "}"}], ",", 
     RowBox[{"{", 
      RowBox[{
      "0.32`", ",", "0.275`", ",", "0.950984`", ",", "0.97478`", ",", 
       "0.449147`", ",", "0.384186`"}], "}"}], ",", 
     RowBox[{"{", 
      RowBox[{
      "0.32`", ",", "0.3`", ",", "0.94746`", ",", "0.979519`", ",", 
       "0.460041`", ",", "0.39262`"}], "}"}], ",", 
     RowBox[{"{", 
      RowBox[{
      "0.32`", ",", "0.325`", ",", "0.942488`", ",", "0.983928`", ",", 
       "0.473905`", ",", "0.402168`"}], "}"}], ",", 
     RowBox[{"{", 
      RowBox[{
      "0.32`", ",", "0.35`", ",", "0.939633`", ",", "0.987241`", ",", 
       "0.483237`", ",", "0.409005`"}], "}"}], ",", 
     RowBox[{"{", 
      RowBox[{
      "0.32`", ",", "0.375`", ",", "0.937121`", ",", "0.990232`", ",", 
       "0.493136`", ",", "0.416188`"}], "}"}], ",", 
     RowBox[{"{", 
      RowBox[{
      "0.32`", ",", "0.4`", ",", "0.933775`", ",", "0.990761`", ",", 
       "0.504392`", ",", "0.424233`"}], "}"}], ",", 
     RowBox[{"{", 
      RowBox[{
      "0.32`", ",", "0.425`", ",", "0.931444`", ",", "0.990104`", ",", 
       "0.515316`", ",", "0.433417`"}], "}"}], ",", 
     RowBox[{"{", 
      RowBox[{
      "0.32`", ",", "0.45`", ",", "0.930073`", ",", "0.989827`", ",", 
       "0.520978`", ",", "0.438129`"}], "}"}], ",", 
     RowBox[{"{", 
      RowBox[{
      "0.32`", ",", "0.475`", ",", "0.927925`", ",", "0.989195`", ",", 
       "0.529147`", ",", "0.445286`"}], "}"}], ",", 
     RowBox[{"{", 
      RowBox[{
      "0.32`", ",", "0.5`", ",", "0.92507`", ",", "0.98877`", ",", 
       "0.537933`", ",", "0.452185`"}], "}"}], ",", 
     RowBox[{"{", 
      RowBox[{
      "0.33`", ",", "0.`", ",", "0.952326`", ",", "0.993328`", ",", 
       "0.0507305`", ",", "0.0412032`"}], "}"}], ",", 
     RowBox[{"{", 
      RowBox[{
      "0.33`", ",", "0.025`", ",", "0.984469`", ",", "0.989115`", ",", 
       "0.104691`", ",", "0.0787889`"}], "}"}], ",", 
     RowBox[{"{", 
      RowBox[{
      "0.33`", ",", "0.05`", ",", "0.988502`", ",", "0.983182`", ",", 
       "0.188979`", ",", "0.158218`"}], "}"}], ",", 
     RowBox[{"{", 
      RowBox[{
      "0.33`", ",", "0.075`", ",", "0.985232`", ",", "0.976183`", ",", 
       "0.253456`", ",", "0.216258`"}], "}"}], ",", 
     RowBox[{"{", 
      RowBox[{
      "0.33`", ",", "0.1`", ",", "0.980578`", ",", "0.965519`", ",", 
       "0.303605`", ",", "0.259794`"}], "}"}], ",", 
     RowBox[{"{", 
      RowBox[{
      "0.33`", ",", "0.125`", ",", "0.975993`", ",", "0.961235`", ",", 
       "0.343377`", ",", "0.29379`"}], "}"}], ",", 
     RowBox[{"{", 
      RowBox[{
      "0.33`", ",", "0.15`", ",", "0.971606`", ",", "0.959939`", ",", 
       "0.368032`", ",", "0.315951`"}], "}"}], ",", 
     RowBox[{"{", 
      RowBox[{
      "0.33`", ",", "0.175`", ",", "0.967081`", ",", "0.961379`", ",", 
       "0.388889`", ",", "0.334105`"}], "}"}], ",", 
     RowBox[{"{", 
      RowBox[{
      "0.33`", ",", "0.2`", ",", "0.962485`", ",", "0.963744`", ",", 
       "0.406271`", ",", "0.348496`"}], "}"}], ",", 
     RowBox[{"{", 
      RowBox[{
      "0.33`", ",", "0.225`", ",", "0.958898`", ",", "0.966225`", ",", 
       "0.4213`", ",", "0.362037`"}], "}"}], ",", 
     RowBox[{"{", 
      RowBox[{
      "0.33`", ",", "0.25`", ",", "0.954635`", ",", "0.970488`", ",", 
       "0.43609`", ",", "0.373812`"}], "}"}], ",", 
     RowBox[{"{", 
      RowBox[{
      "0.33`", ",", "0.275`", ",", "0.950637`", ",", "0.974486`", ",", 
       "0.44968`", ",", "0.384487`"}], "}"}], ",", 
     RowBox[{"{", 
      RowBox[{
      "0.33`", ",", "0.3`", ",", "0.947109`", ",", "0.979662`", ",", 
       "0.460102`", ",", "0.391963`"}], "}"}], ",", 
     RowBox[{"{", 
      RowBox[{
      "0.33`", ",", "0.325`", ",", "0.943258`", ",", "0.98349`", ",", 
       "0.470504`", ",", "0.399311`"}], "}"}], ",", 
     RowBox[{"{", 
      RowBox[{
      "0.33`", ",", "0.35`", ",", "0.94057`", ",", "0.98862`", ",", 
       "0.482705`", ",", "0.408796`"}], "}"}], ",", 
     RowBox[{"{", 
      RowBox[{
      "0.33`", ",", "0.375`", ",", "0.937453`", ",", "0.989857`", ",", 
       "0.493035`", ",", "0.416487`"}], "}"}], ",", 
     RowBox[{"{", 
      RowBox[{
      "0.33`", ",", "0.4`", ",", "0.935204`", ",", "0.990023`", ",", 
       "0.502439`", ",", "0.423832`"}], "}"}], ",", 
     RowBox[{"{", 
      RowBox[{
      "0.33`", ",", "0.425`", ",", "0.9326`", ",", "0.990792`", ",", 
       "0.511952`", ",", "0.431052`"}], "}"}], ",", 
     RowBox[{"{", 
      RowBox[{
      "0.33`", ",", "0.45`", ",", "0.92902`", ",", "0.989816`", ",", 
       "0.521994`", ",", "0.438317`"}], "}"}], ",", 
     RowBox[{"{", 
      RowBox[{
      "0.33`", ",", "0.475`", ",", "0.929051`", ",", "0.989409`", ",", 
       "0.528908`", ",", "0.446133`"}], "}"}], ",", 
     RowBox[{"{", 
      RowBox[{
      "0.33`", ",", "0.5`", ",", "0.926275`", ",", "0.988559`", ",", 
       "0.538969`", ",", "0.454383`"}], "}"}], ",", 
     RowBox[{"{", 
      RowBox[{
      "0.34`", ",", "0.`", ",", "0.956697`", ",", "0.99352`", ",", 
       "0.0532723`", ",", "0.0431519`"}], "}"}], ",", 
     RowBox[{"{", 
      RowBox[{
      "0.34`", ",", "0.025`", ",", "0.984392`", ",", "0.989182`", ",", 
       "0.107327`", ",", "0.0809553`"}], "}"}], ",", 
     RowBox[{"{", 
      RowBox[{
      "0.34`", ",", "0.05`", ",", "0.987941`", ",", "0.98285`", ",", 
       "0.189872`", ",", "0.158638`"}], "}"}], ",", 
     RowBox[{"{", 
      RowBox[{
      "0.34`", ",", "0.075`", ",", "0.984394`", ",", "0.975556`", ",", 
       "0.253635`", ",", "0.215631`"}], "}"}], ",", 
     RowBox[{"{", 
      RowBox[{
      "0.34`", ",", "0.1`", ",", "0.980214`", ",", "0.965716`", ",", 
       "0.30523`", ",", "0.26032`"}], "}"}], ",", 
     RowBox[{"{", 
      RowBox[{
      "0.34`", ",", "0.125`", ",", "0.976013`", ",", "0.960907`", ",", 
       "0.342441`", ",", "0.292312`"}], "}"}], ",", 
     RowBox[{"{", 
      RowBox[{
      "0.34`", ",", "0.15`", ",", "0.972286`", ",", "0.959742`", ",", 
       "0.36831`", ",", "0.31615`"}], "}"}], ",", 
     RowBox[{"{", 
      RowBox[{
      "0.34`", ",", "0.175`", ",", "0.967356`", ",", "0.961514`", ",", 
       "0.389507`", ",", "0.33532`"}], "}"}], ",", 
     RowBox[{"{", 
      RowBox[{
      "0.34`", ",", "0.2`", ",", "0.962658`", ",", "0.963528`", ",", 
       "0.407869`", ",", "0.350604`"}], "}"}], ",", 
     RowBox[{"{", 
      RowBox[{
      "0.34`", ",", "0.225`", ",", "0.958381`", ",", "0.966147`", ",", 
       "0.423675`", ",", "0.363908`"}], "}"}], ",", 
     RowBox[{"{", 
      RowBox[{
      "0.34`", ",", "0.25`", ",", "0.955052`", ",", "0.970233`", ",", 
       "0.435515`", ",", "0.37337`"}], "}"}], ",", 
     RowBox[{"{", 
      RowBox[{
      "0.34`", ",", "0.275`", ",", "0.951687`", ",", "0.974032`", ",", 
       "0.449378`", ",", "0.384758`"}], "}"}], ",", 
     RowBox[{"{", 
      RowBox[{
      "0.34`", ",", "0.3`", ",", "0.947523`", ",", "0.979113`", ",", 
       "0.460653`", ",", "0.393316`"}], "}"}], ",", 
     RowBox[{"{", 
      RowBox[{
      "0.34`", ",", "0.325`", ",", "0.944901`", ",", "0.983553`", ",", 
       "0.472305`", ",", "0.402961`"}], "}"}], ",", 
     RowBox[{"{", 
      RowBox[{
      "0.34`", ",", "0.35`", ",", "0.940668`", ",", "0.988103`", ",", 
       "0.479954`", ",", "0.406988`"}], "}"}], ",", 
     RowBox[{"{", 
      RowBox[{
      "0.34`", ",", "0.375`", ",", "0.937872`", ",", "0.990123`", ",", 
       "0.493082`", ",", "0.416382`"}], "}"}], ",", 
     RowBox[{"{", 
      RowBox[{
      "0.34`", ",", "0.4`", ",", "0.93498`", ",", "0.990539`", ",", 
       "0.505012`", ",", "0.426465`"}], "}"}], ",", 
     RowBox[{"{", 
      RowBox[{
      "0.34`", ",", "0.425`", ",", "0.932605`", ",", "0.990933`", ",", 
       "0.515459`", ",", "0.434305`"}], "}"}], ",", 
     RowBox[{"{", 
      RowBox[{
      "0.34`", ",", "0.45`", ",", "0.930125`", ",", "0.989638`", ",", 
       "0.520341`", ",", "0.437792`"}], "}"}], ",", 
     RowBox[{"{", 
      RowBox[{
      "0.34`", ",", "0.475`", ",", "0.927914`", ",", "0.989439`", ",", 
       "0.527967`", ",", "0.444055`"}], "}"}], ",", 
     RowBox[{"{", 
      RowBox[{
      "0.34`", ",", "0.5`", ",", "0.926721`", ",", "0.988754`", ",", 
       "0.535279`", ",", "0.450782`"}], "}"}], ",", 
     RowBox[{"{", 
      RowBox[{
      "0.35`", ",", "0.`", ",", "0.958973`", ",", "0.993301`", ",", 
       "0.0558565`", ",", "0.044984`"}], "}"}], ",", 
     RowBox[{"{", 
      RowBox[{
      "0.35`", ",", "0.025`", ",", "0.984466`", ",", "0.989436`", ",", 
       "0.109012`", ",", "0.0824071`"}], "}"}], ",", 
     RowBox[{"{", 
      RowBox[{
      "0.35`", ",", "0.05`", ",", "0.987812`", ",", "0.982898`", ",", 
       "0.191013`", ",", "0.15995`"}], "}"}], ",", 
     RowBox[{"{", 
      RowBox[{
      "0.35`", ",", "0.075`", ",", "0.985232`", ",", "0.975059`", ",", 
       "0.25365`", ",", "0.215887`"}], "}"}], ",", 
     RowBox[{"{", 
      RowBox[{
      "0.35`", ",", "0.1`", ",", "0.981058`", ",", "0.965871`", ",", 
       "0.304204`", ",", "0.260176`"}], "}"}], ",", 
     RowBox[{"{", 
      RowBox[{
      "0.35`", ",", "0.125`", ",", "0.976379`", ",", "0.960399`", ",", 
       "0.342878`", ",", "0.292981`"}], "}"}], ",", 
     RowBox[{"{", 
      RowBox[{
      "0.35`", ",", "0.15`", ",", "0.971592`", ",", "0.959725`", ",", 
       "0.369549`", ",", "0.31692`"}], "}"}], ",", 
     RowBox[{"{", 
      RowBox[{
      "0.35`", ",", "0.175`", ",", "0.967341`", ",", "0.961468`", ",", 
       "0.388927`", ",", "0.333899`"}], "}"}], ",", 
     RowBox[{"{", 
      RowBox[{
      "0.35`", ",", "0.2`", ",", "0.963951`", ",", "0.96366`", ",", 
       "0.407595`", ",", "0.351108`"}], "}"}], ",", 
     RowBox[{"{", 
      RowBox[{
      "0.35`", ",", "0.225`", ",", "0.959135`", ",", "0.966123`", ",", 
       "0.421406`", ",", "0.36189`"}], "}"}], ",", 
     RowBox[{"{", 
      RowBox[{
      "0.35`", ",", "0.25`", ",", "0.955358`", ",", "0.969521`", ",", 
       "0.433478`", ",", "0.37182`"}], "}"}], ",", 
     RowBox[{"{", 
      RowBox[{
      "0.35`", ",", "0.275`", ",", "0.951981`", ",", "0.973383`", ",", 
       "0.448867`", ",", "0.385205`"}], "}"}], ",", 
     RowBox[{"{", 
      RowBox[{
      "0.35`", ",", "0.3`", ",", "0.94779`", ",", "0.979057`", ",", 
       "0.458398`", ",", "0.391352`"}], "}"}], ",", 
     RowBox[{"{", 
      RowBox[{
      "0.35`", ",", "0.325`", ",", "0.944171`", ",", "0.982005`", ",", 
       "0.470878`", ",", "0.401161`"}], "}"}], ",", 
     RowBox[{"{", 
      RowBox[{
      "0.35`", ",", "0.35`", ",", "0.940718`", ",", "0.986936`", ",", 
       "0.480627`", ",", "0.407459`"}], "}"}], ",", 
     RowBox[{"{", 
      RowBox[{
      "0.35`", ",", "0.375`", ",", "0.937876`", ",", "0.990281`", ",", 
       "0.492622`", ",", "0.416519`"}], "}"}], ",", 
     RowBox[{"{", 
      RowBox[{
      "0.35`", ",", "0.4`", ",", "0.934686`", ",", "0.989694`", ",", 
       "0.503143`", ",", "0.423918`"}], "}"}], ",", 
     RowBox[{"{", 
      RowBox[{
      "0.35`", ",", "0.425`", ",", "0.932215`", ",", "0.990521`", ",", 
       "0.510687`", ",", "0.429513`"}], "}"}], ",", 
     RowBox[{"{", 
      RowBox[{
      "0.35`", ",", "0.45`", ",", "0.930202`", ",", "0.989495`", ",", 
       "0.521795`", ",", "0.439033`"}], "}"}], ",", 
     RowBox[{"{", 
      RowBox[{
      "0.35`", ",", "0.475`", ",", "0.928816`", ",", "0.98934`", ",", 
       "0.529599`", ",", "0.446302`"}], "}"}], ",", 
     RowBox[{"{", 
      RowBox[{
      "0.35`", ",", "0.5`", ",", "0.926438`", ",", "0.98888`", ",", "0.5358`",
        ",", "0.450699`"}], "}"}], ",", 
     RowBox[{"{", 
      RowBox[{
      "0.36`", ",", "0.`", ",", "0.957776`", ",", "0.993956`", ",", 
       "0.0580977`", ",", "0.0471109`"}], "}"}], ",", 
     RowBox[{"{", 
      RowBox[{
      "0.36`", ",", "0.025`", ",", "0.984662`", ",", "0.989351`", ",", 
       "0.11039`", ",", "0.0840392`"}], "}"}], ",", 
     RowBox[{"{", 
      RowBox[{
      "0.36`", ",", "0.05`", ",", "0.987744`", ",", "0.983025`", ",", 
       "0.191949`", ",", "0.160573`"}], "}"}], ",", 
     RowBox[{"{", 
      RowBox[{
      "0.36`", ",", "0.075`", ",", "0.985335`", ",", "0.975391`", ",", 
       "0.255757`", ",", "0.2181`"}], "}"}], ",", 
     RowBox[{"{", 
      RowBox[{
      "0.36`", ",", "0.1`", ",", "0.981187`", ",", "0.966011`", ",", 
       "0.307238`", ",", "0.262837`"}], "}"}], ",", 
     RowBox[{"{", 
      RowBox[{
      "0.36`", ",", "0.125`", ",", "0.97662`", ",", "0.960548`", ",", 
       "0.343383`", ",", "0.293711`"}], "}"}], ",", 
     RowBox[{"{", 
      RowBox[{
      "0.36`", ",", "0.15`", ",", "0.972016`", ",", "0.959875`", ",", 
       "0.368473`", ",", "0.315713`"}], "}"}], ",", 
     RowBox[{"{", 
      RowBox[{
      "0.36`", ",", "0.175`", ",", "0.968052`", ",", "0.960893`", ",", 
       "0.388348`", ",", "0.333983`"}], "}"}], ",", 
     RowBox[{"{", 
      RowBox[{
      "0.36`", ",", "0.2`", ",", "0.964077`", ",", "0.962647`", ",", 
       "0.404878`", ",", "0.348389`"}], "}"}], ",", 
     RowBox[{"{", 
      RowBox[{
      "0.36`", ",", "0.225`", ",", "0.959834`", ",", "0.96609`", ",", 
       "0.420323`", ",", "0.361816`"}], "}"}], ",", 
     RowBox[{"{", 
      RowBox[{
      "0.36`", ",", "0.25`", ",", "0.95585`", ",", "0.96865`", ",", 
       "0.433106`", ",", "0.372061`"}], "}"}], ",", 
     RowBox[{"{", 
      RowBox[{
      "0.36`", ",", "0.275`", ",", "0.951982`", ",", "0.97293`", ",", 
       "0.447659`", ",", "0.383666`"}], "}"}], ",", 
     RowBox[{"{", 
      RowBox[{
      "0.36`", ",", "0.3`", ",", "0.948038`", ",", "0.977178`", ",", 
       "0.458924`", ",", "0.392118`"}], "}"}], ",", 
     RowBox[{"{", 
      RowBox[{
      "0.36`", ",", "0.325`", ",", "0.945112`", ",", "0.983164`", ",", 
       "0.47161`", ",", "0.40233`"}], "}"}], ",", 
     RowBox[{"{", 
      RowBox[{
      "0.36`", ",", "0.35`", ",", "0.941828`", ",", "0.986959`", ",", 
       "0.482299`", ",", "0.410103`"}], "}"}], ",", 
     RowBox[{"{", 
      RowBox[{
      "0.36`", ",", "0.375`", ",", "0.938452`", ",", "0.990181`", ",", 
       "0.491819`", ",", "0.416674`"}], "}"}], ",", 
     RowBox[{"{", 
      RowBox[{
      "0.36`", ",", "0.4`", ",", "0.935843`", ",", "0.990123`", ",", 
       "0.502775`", ",", "0.42505`"}], "}"}], ",", 
     RowBox[{"{", 
      RowBox[{
      "0.36`", ",", "0.425`", ",", "0.933381`", ",", "0.991157`", ",", 
       "0.511323`", ",", "0.431062`"}], "}"}], ",", 
     RowBox[{"{", 
      RowBox[{
      "0.36`", ",", "0.45`", ",", "0.930113`", ",", "0.989742`", ",", 
       "0.522179`", ",", "0.439276`"}], "}"}], ",", 
     RowBox[{"{", 
      RowBox[{
      "0.36`", ",", "0.475`", ",", "0.928566`", ",", "0.989653`", ",", 
       "0.527396`", ",", "0.4438`"}], "}"}], ",", 
     RowBox[{"{", 
      RowBox[{
      "0.36`", ",", "0.5`", ",", "0.9257`", ",", "0.988789`", ",", 
       "0.536178`", ",", "0.4502`"}], "}"}], ",", 
     RowBox[{"{", 
      RowBox[{
      "0.37`", ",", "0.`", ",", "0.958049`", ",", "0.992565`", ",", 
       "0.0614221`", ",", "0.0494172`"}], "}"}], ",", 
     RowBox[{"{", 
      RowBox[{
      "0.37`", ",", "0.025`", ",", "0.985197`", ",", "0.989142`", ",", 
       "0.1119`", ",", "0.0862923`"}], "}"}], ",", 
     RowBox[{"{", 
      RowBox[{
      "0.37`", ",", "0.05`", ",", "0.98774`", ",", "0.982914`", ",", 
       "0.193783`", ",", "0.161848`"}], "}"}], ",", 
     RowBox[{"{", 
      RowBox[{
      "0.37`", ",", "0.075`", ",", "0.985426`", ",", "0.975796`", ",", 
       "0.255572`", ",", "0.217911`"}], "}"}], ",", 
     RowBox[{"{", 
      RowBox[{
      "0.37`", ",", "0.1`", ",", "0.980815`", ",", "0.966697`", ",", 
       "0.307927`", ",", "0.262187`"}], "}"}], ",", 
     RowBox[{"{", 
      RowBox[{
      "0.37`", ",", "0.125`", ",", "0.97662`", ",", "0.960556`", ",", 
       "0.342786`", ",", "0.292696`"}], "}"}], ",", 
     RowBox[{"{", 
      RowBox[{
      "0.37`", ",", "0.15`", ",", "0.97214`", ",", "0.95928`", ",", 
       "0.369043`", ",", "0.316395`"}], "}"}], ",", 
     RowBox[{"{", 
      RowBox[{
      "0.37`", ",", "0.175`", ",", "0.967864`", ",", "0.960999`", ",", 
       "0.391429`", ",", "0.336783`"}], "}"}], ",", 
     RowBox[{"{", 
      RowBox[{
      "0.37`", ",", "0.2`", ",", "0.963829`", ",", "0.963139`", ",", 
       "0.405151`", ",", "0.348372`"}], "}"}], ",", 
     RowBox[{"{", 
      RowBox[{
      "0.37`", ",", "0.225`", ",", "0.959612`", ",", "0.965335`", ",", 
       "0.422525`", ",", "0.363713`"}], "}"}], ",", 
     RowBox[{"{", 
      RowBox[{
      "0.37`", ",", "0.25`", ",", "0.955441`", ",", "0.96885`", ",", 
       "0.435184`", ",", "0.372713`"}], "}"}], ",", 
     RowBox[{"{", 
      RowBox[{
      "0.37`", ",", "0.275`", ",", "0.952276`", ",", "0.97305`", ",", 
       "0.448268`", ",", "0.38486`"}], "}"}], ",", 
     RowBox[{"{", 
      RowBox[{
      "0.37`", ",", "0.3`", ",", "0.948938`", ",", "0.977336`", ",", 
       "0.456423`", ",", "0.390179`"}], "}"}], ",", 
     RowBox[{"{", 
      RowBox[{
      "0.37`", ",", "0.325`", ",", "0.94504`", ",", "0.981841`", ",", 
       "0.470721`", ",", "0.401527`"}], "}"}], ",", 
     RowBox[{"{", 
      RowBox[{
      "0.37`", ",", "0.35`", ",", "0.942093`", ",", "0.985735`", ",", 
       "0.481137`", ",", "0.409153`"}], "}"}], ",", 
     RowBox[{"{", 
      RowBox[{
      "0.37`", ",", "0.375`", ",", "0.9381`", ",", "0.989642`", ",", 
       "0.491786`", ",", "0.416348`"}], "}"}], ",", 
     RowBox[{"{", 
      RowBox[{
      "0.37`", ",", "0.4`", ",", "0.935093`", ",", "0.990104`", ",", 
       "0.504569`", ",", "0.426285`"}], "}"}], ",", 
     RowBox[{"{", 
      RowBox[{
      "0.37`", ",", "0.425`", ",", "0.933478`", ",", "0.991191`", ",", 
       "0.511835`", ",", "0.432143`"}], "}"}], ",", 
     RowBox[{"{", 
      RowBox[{
      "0.37`", ",", "0.45`", ",", "0.931743`", ",", "0.989754`", ",", 
       "0.520414`", ",", "0.439137`"}], "}"}], ",", 
     RowBox[{"{", 
      RowBox[{
      "0.37`", ",", "0.475`", ",", "0.92954`", ",", "0.989383`", ",", 
       "0.530528`", ",", "0.448284`"}], "}"}], ",", 
     RowBox[{"{", 
      RowBox[{
      "0.37`", ",", "0.5`", ",", "0.926592`", ",", "0.988789`", ",", 
       "0.535734`", ",", "0.451321`"}], "}"}], ",", 
     RowBox[{"{", 
      RowBox[{
      "0.38`", ",", "0.`", ",", "0.957275`", ",", "0.992175`", ",", 
       "0.0634394`", ",", "0.0513533`"}], "}"}], ",", 
     RowBox[{"{", 
      RowBox[{
      "0.38`", ",", "0.025`", ",", "0.985225`", ",", "0.989297`", ",", 
       "0.112532`", ",", "0.0870225`"}], "}"}], ",", 
     RowBox[{"{", 
      RowBox[{
      "0.38`", ",", "0.05`", ",", "0.988444`", ",", "0.98301`", ",", 
       "0.194185`", ",", "0.162465`"}], "}"}], ",", 
     RowBox[{"{", 
      RowBox[{
      "0.38`", ",", "0.075`", ",", "0.985177`", ",", "0.975933`", ",", 
       "0.258738`", ",", "0.221228`"}], "}"}], ",", 
     RowBox[{"{", 
      RowBox[{
      "0.38`", ",", "0.1`", ",", "0.980333`", ",", "0.96685`", ",", 
       "0.308148`", ",", "0.261506`"}], "}"}], ",", 
     RowBox[{"{", 
      RowBox[{
      "0.38`", ",", "0.125`", ",", "0.977312`", ",", "0.96013`", ",", 
       "0.34337`", ",", "0.29404`"}], "}"}], ",", 
     RowBox[{"{", 
      RowBox[{
      "0.38`", ",", "0.15`", ",", "0.972318`", ",", "0.959131`", ",", 
       "0.370172`", ",", "0.317756`"}], "}"}], ",", 
     RowBox[{"{", 
      RowBox[{
      "0.38`", ",", "0.175`", ",", "0.96784`", ",", "0.960518`", ",", 
       "0.390818`", ",", "0.336134`"}], "}"}], ",", 
     RowBox[{"{", 
      RowBox[{
      "0.38`", ",", "0.2`", ",", "0.96409`", ",", "0.96249`", ",", "0.40718`",
        ",", "0.350697`"}], "}"}], ",", 
     RowBox[{"{", 
      RowBox[{
      "0.38`", ",", "0.225`", ",", "0.959897`", ",", "0.96489`", ",", 
       "0.424697`", ",", "0.365883`"}], "}"}], ",", 
     RowBox[{"{", 
      RowBox[{
      "0.38`", ",", "0.25`", ",", "0.956967`", ",", "0.968181`", ",", 
       "0.434059`", ",", "0.373751`"}], "}"}], ",", 
     RowBox[{"{", 
      RowBox[{
      "0.38`", ",", "0.275`", ",", "0.952932`", ",", "0.97255`", ",", 
       "0.448665`", ",", "0.385354`"}], "}"}], ",", 
     RowBox[{"{", 
      RowBox[{
      "0.38`", ",", "0.3`", ",", "0.948743`", ",", "0.977702`", ",", 
       "0.458051`", ",", "0.391565`"}], "}"}], ",", 
     RowBox[{"{", 
      RowBox[{
      "0.38`", ",", "0.325`", ",", "0.944413`", ",", "0.981424`", ",", 
       "0.469463`", ",", "0.400297`"}], "}"}], ",", 
     RowBox[{"{", 
      RowBox[{
      "0.38`", ",", "0.35`", ",", "0.94259`", ",", "0.985773`", ",", 
       "0.481627`", ",", "0.410133`"}], "}"}], ",", 
     RowBox[{"{", 
      RowBox[{
      "0.38`", ",", "0.375`", ",", "0.938566`", ",", "0.989146`", ",", 
       "0.492157`", ",", "0.417604`"}], "}"}], ",", 
     RowBox[{"{", 
      RowBox[{
      "0.38`", ",", "0.4`", ",", "0.935861`", ",", "0.98997`", ",", 
       "0.503692`", ",", "0.426263`"}], "}"}], ",", 
     RowBox[{"{", 
      RowBox[{
      "0.38`", ",", "0.425`", ",", "0.934533`", ",", "0.990914`", ",", 
       "0.510453`", ",", "0.431783`"}], "}"}], ",", 
     RowBox[{"{", 
      RowBox[{
      "0.38`", ",", "0.45`", ",", "0.93136`", ",", "0.989759`", ",", 
       "0.521611`", ",", "0.440533`"}], "}"}], ",", 
     RowBox[{"{", 
      RowBox[{
      "0.38`", ",", "0.475`", ",", "0.929069`", ",", "0.989534`", ",", 
       "0.527505`", ",", "0.444347`"}], "}"}], ",", 
     RowBox[{"{", 
      RowBox[{
      "0.38`", ",", "0.5`", ",", "0.927289`", ",", "0.988918`", ",", 
       "0.536098`", ",", "0.452485`"}], "}"}], ",", 
     RowBox[{"{", 
      RowBox[{
      "0.39`", ",", "0.`", ",", "0.95205`", ",", "0.992147`", ",", 
       "0.0642239`", ",", "0.0519435`"}], "}"}], ",", 
     RowBox[{"{", 
      RowBox[{
      "0.39`", ",", "0.025`", ",", "0.985605`", ",", "0.989374`", ",", 
       "0.113279`", ",", "0.0879809`"}], "}"}], ",", 
     RowBox[{"{", 
      RowBox[{
      "0.39`", ",", "0.05`", ",", "0.987765`", ",", "0.983337`", ",", 
       "0.196229`", ",", "0.164385`"}], "}"}], ",", 
     RowBox[{"{", 
      RowBox[{
      "0.39`", ",", "0.075`", ",", "0.984784`", ",", "0.975551`", ",", 
       "0.258575`", ",", "0.220037`"}], "}"}], ",", 
     RowBox[{"{", 
      RowBox[{
      "0.39`", ",", "0.1`", ",", "0.980718`", ",", "0.967328`", ",", 
       "0.309519`", ",", "0.263283`"}], "}"}], ",", 
     RowBox[{"{", 
      RowBox[{
      "0.39`", ",", "0.125`", ",", "0.97674`", ",", "0.960213`", ",", 
       "0.344058`", ",", "0.293688`"}], "}"}], ",", 
     RowBox[{"{", 
      RowBox[{
      "0.39`", ",", "0.15`", ",", "0.972379`", ",", "0.958926`", ",", 
       "0.369813`", ",", "0.316983`"}], "}"}], ",", 
     RowBox[{"{", 
      RowBox[{
      "0.39`", ",", "0.175`", ",", "0.968295`", ",", "0.960854`", ",", 
       "0.388964`", ",", "0.334209`"}], "}"}], ",", 
     RowBox[{"{", 
      RowBox[{
      "0.39`", ",", "0.2`", ",", "0.964091`", ",", "0.961965`", ",", 
       "0.404633`", ",", "0.348099`"}], "}"}], ",", 
     RowBox[{"{", 
      RowBox[{
      "0.39`", ",", "0.225`", ",", "0.960122`", ",", "0.964384`", ",", 
       "0.42167`", ",", "0.362895`"}], "}"}], ",", 
     RowBox[{"{", 
      RowBox[{
      "0.39`", ",", "0.25`", ",", "0.956581`", ",", "0.96816`", ",", 
       "0.433975`", ",", "0.373291`"}], "}"}], ",", 
     RowBox[{"{", 
      RowBox[{
      "0.39`", ",", "0.275`", ",", "0.952201`", ",", "0.972152`", ",", 
       "0.445232`", ",", "0.380757`"}], "}"}], ",", 
     RowBox[{"{", 
      RowBox[{
      "0.39`", ",", "0.3`", ",", "0.948844`", ",", "0.976429`", ",", 
       "0.456862`", ",", "0.390372`"}], "}"}], ",", 
     RowBox[{"{", 
      RowBox[{
      "0.39`", ",", "0.325`", ",", "0.944909`", ",", "0.981078`", ",", 
       "0.469107`", ",", "0.400172`"}], "}"}], ",", 
     RowBox[{"{", 
      RowBox[{
      "0.39`", ",", "0.35`", ",", "0.942097`", ",", "0.985556`", ",", 
       "0.481562`", ",", "0.409954`"}], "}"}], ",", 
     RowBox[{"{", 
      RowBox[{
      "0.39`", ",", "0.375`", ",", "0.939769`", ",", "0.988883`", ",", 
       "0.488065`", ",", "0.413919`"}], "}"}], ",", 
     RowBox[{"{", 
      RowBox[{
      "0.39`", ",", "0.4`", ",", "0.936756`", ",", "0.989794`", ",", 
       "0.501055`", ",", "0.424584`"}], "}"}], ",", 
     RowBox[{"{", 
      RowBox[{
      "0.39`", ",", "0.425`", ",", "0.933796`", ",", "0.990873`", ",", 
       "0.512168`", ",", "0.432597`"}], "}"}], ",", 
     RowBox[{"{", 
      RowBox[{
      "0.39`", ",", "0.45`", ",", "0.931741`", ",", "0.989614`", ",", 
       "0.520431`", ",", "0.439373`"}], "}"}], ",", 
     RowBox[{"{", 
      RowBox[{
      "0.39`", ",", "0.475`", ",", "0.929597`", ",", "0.989587`", ",", 
       "0.525964`", ",", "0.443262`"}], "}"}], ",", 
     RowBox[{"{", 
      RowBox[{
      "0.39`", ",", "0.5`", ",", "0.927254`", ",", "0.988941`", ",", 
       "0.536239`", ",", "0.451724`"}], "}"}], ",", 
     RowBox[{"{", 
      RowBox[{
      "0.4`", ",", "0.`", ",", "0.958106`", ",", "0.992828`", ",", 
       "0.0670741`", ",", "0.053828`"}], "}"}], ",", 
     RowBox[{"{", 
      RowBox[{
      "0.4`", ",", "0.025`", ",", "0.985712`", ",", "0.989471`", ",", 
       "0.114697`", ",", "0.0892339`"}], "}"}], ",", 
     RowBox[{"{", 
      RowBox[{
      "0.4`", ",", "0.05`", ",", "0.987955`", ",", "0.983358`", ",", 
       "0.19784`", ",", "0.165302`"}], "}"}], ",", 
     RowBox[{"{", 
      RowBox[{
      "0.4`", ",", "0.075`", ",", "0.984752`", ",", "0.976239`", ",", 
       "0.259203`", ",", "0.220938`"}], "}"}], ",", 
     RowBox[{"{", 
      RowBox[{
      "0.4`", ",", "0.1`", ",", "0.981439`", ",", "0.967696`", ",", 
       "0.309053`", ",", "0.263457`"}], "}"}], ",", 
     RowBox[{"{", 
      RowBox[{
      "0.4`", ",", "0.125`", ",", "0.977401`", ",", "0.959489`", ",", 
       "0.344345`", ",", "0.294617`"}], "}"}], ",", 
     RowBox[{"{", 
      RowBox[{
      "0.4`", ",", "0.15`", ",", "0.972449`", ",", "0.9588`", ",", "0.37002`",
        ",", "0.316997`"}], "}"}], ",", 
     RowBox[{"{", 
      RowBox[{
      "0.4`", ",", "0.175`", ",", "0.968449`", ",", "0.960452`", ",", 
       "0.390762`", ",", "0.336083`"}], "}"}], ",", 
     RowBox[{"{", 
      RowBox[{
      "0.4`", ",", "0.2`", ",", "0.964412`", ",", "0.96214`", ",", 
       "0.407996`", ",", "0.351509`"}], "}"}], ",", 
     RowBox[{"{", 
      RowBox[{
      "0.4`", ",", "0.225`", ",", "0.960216`", ",", "0.964091`", ",", 
       "0.422087`", ",", "0.363207`"}], "}"}], ",", 
     RowBox[{"{", 
      RowBox[{
      "0.4`", ",", "0.25`", ",", "0.956591`", ",", "0.967449`", ",", 
       "0.434848`", ",", "0.373933`"}], "}"}], ",", 
     RowBox[{"{", 
      RowBox[{
      "0.4`", ",", "0.275`", ",", "0.952428`", ",", "0.97149`", ",", 
       "0.446215`", ",", "0.382675`"}], "}"}], ",", 
     RowBox[{"{", 
      RowBox[{
      "0.4`", ",", "0.3`", ",", "0.948858`", ",", "0.976084`", ",", 
       "0.458812`", ",", "0.39251`"}], "}"}], ",", 
     RowBox[{"{", 
      RowBox[{
      "0.4`", ",", "0.325`", ",", "0.945872`", ",", "0.981244`", ",", 
       "0.470735`", ",", "0.402382`"}], "}"}], ",", 
     RowBox[{"{", 
      RowBox[{
      "0.4`", ",", "0.35`", ",", "0.942676`", ",", "0.984871`", ",", 
       "0.481757`", ",", "0.41075`"}], "}"}], ",", 
     RowBox[{"{", 
      RowBox[{
      "0.4`", ",", "0.375`", ",", "0.938983`", ",", "0.989065`", ",", 
       "0.490268`", ",", "0.416029`"}], "}"}], ",", 
     RowBox[{"{", 
      RowBox[{
      "0.4`", ",", "0.4`", ",", "0.936412`", ",", "0.990017`", ",", 
       "0.501235`", ",", "0.424029`"}], "}"}], ",", 
     RowBox[{"{", 
      RowBox[{
      "0.4`", ",", "0.425`", ",", "0.932963`", ",", "0.990949`", ",", 
       "0.510857`", ",", "0.430505`"}], "}"}], ",", 
     RowBox[{"{", 
      RowBox[{
      "0.4`", ",", "0.45`", ",", "0.93118`", ",", "0.989778`", ",", 
       "0.519554`", ",", "0.43772`"}], "}"}], ",", 
     RowBox[{"{", 
      RowBox[{
      "0.4`", ",", "0.475`", ",", "0.929735`", ",", "0.98978`", ",", 
       "0.52792`", ",", "0.445427`"}], "}"}], ",", 
     RowBox[{"{", 
      RowBox[{
      "0.4`", ",", "0.5`", ",", "0.927503`", ",", "0.98907`", ",", 
       "0.535617`", ",", "0.451368`"}], "}"}], ",", 
     RowBox[{"{", 
      RowBox[{
      "0.41`", ",", "0.`", ",", "0.963369`", ",", "0.993298`", ",", 
       "0.0705597`", ",", "0.0564004`"}], "}"}], ",", 
     RowBox[{"{", 
      RowBox[{
      "0.41`", ",", "0.025`", ",", "0.98528`", ",", "0.989655`", ",", 
       "0.115761`", ",", "0.0897389`"}], "}"}], ",", 
     RowBox[{"{", 
      RowBox[{
      "0.41`", ",", "0.05`", ",", "0.988004`", ",", "0.98375`", ",", 
       "0.197965`", ",", "0.165273`"}], "}"}], ",", 
     RowBox[{"{", 
      RowBox[{
      "0.41`", ",", "0.075`", ",", "0.985014`", ",", "0.976806`", ",", 
       "0.262507`", ",", "0.224261`"}], "}"}], ",", 
     RowBox[{"{", 
      RowBox[{
      "0.41`", ",", "0.1`", ",", "0.981957`", ",", "0.968777`", ",", 
       "0.309768`", ",", "0.263927`"}], "}"}], ",", 
     RowBox[{"{", 
      RowBox[{
      "0.41`", ",", "0.125`", ",", "0.977015`", ",", "0.960119`", ",", 
       "0.345358`", ",", "0.294633`"}], "}"}], ",", 
     RowBox[{"{", 
      RowBox[{
      "0.41`", ",", "0.15`", ",", "0.972716`", ",", "0.959186`", ",", 
       "0.370998`", ",", "0.317711`"}], "}"}], ",", 
     RowBox[{"{", 
      RowBox[{
      "0.41`", ",", "0.175`", ",", "0.968576`", ",", "0.960479`", ",", 
       "0.391894`", ",", "0.337442`"}], "}"}], ",", 
     RowBox[{"{", 
      RowBox[{
      "0.41`", ",", "0.2`", ",", "0.964805`", ",", "0.961324`", ",", 
       "0.407804`", ",", "0.351592`"}], "}"}], ",", 
     RowBox[{"{", 
      RowBox[{
      "0.41`", ",", "0.225`", ",", "0.961102`", ",", "0.964389`", ",", 
       "0.423146`", ",", "0.364998`"}], "}"}], ",", 
     RowBox[{"{", 
      RowBox[{
      "0.41`", ",", "0.25`", ",", "0.956118`", ",", "0.967128`", ",", 
       "0.435435`", ",", "0.374347`"}], "}"}], ",", 
     RowBox[{"{", 
      RowBox[{
      "0.41`", ",", "0.275`", ",", "0.952929`", ",", "0.971114`", ",", 
       "0.446198`", ",", "0.383178`"}], "}"}], ",", 
     RowBox[{"{", 
      RowBox[{
      "0.41`", ",", "0.3`", ",", "0.950308`", ",", "0.976379`", ",", 
       "0.459744`", ",", "0.394634`"}], "}"}], ",", 
     RowBox[{"{", 
      RowBox[{
      "0.41`", ",", "0.325`", ",", "0.945808`", ",", "0.980333`", ",", 
       "0.468157`", ",", "0.399952`"}], "}"}], ",", 
     RowBox[{"{", 
      RowBox[{
      "0.41`", ",", "0.35`", ",", "0.94305`", ",", "0.984175`", ",", 
       "0.479664`", ",", "0.408872`"}], "}"}], ",", 
     RowBox[{"{", 
      RowBox[{
      "0.41`", ",", "0.375`", ",", "0.93898`", ",", "0.988377`", ",", 
       "0.490962`", ",", "0.416835`"}], "}"}], ",", 
     RowBox[{"{", 
      RowBox[{
      "0.41`", ",", "0.4`", ",", "0.937225`", ",", "0.989876`", ",", 
       "0.500739`", ",", "0.424117`"}], "}"}], ",", 
     RowBox[{"{", 
      RowBox[{
      "0.41`", ",", "0.425`", ",", "0.933689`", ",", "0.990835`", ",", 
       "0.510028`", ",", "0.430488`"}], "}"}], ",", 
     RowBox[{"{", 
      RowBox[{
      "0.41`", ",", "0.45`", ",", "0.931393`", ",", "0.989527`", ",", 
       "0.518214`", ",", "0.436596`"}], "}"}], ",", 
     RowBox[{"{", 
      RowBox[{
      "0.41`", ",", "0.475`", ",", "0.929534`", ",", "0.989655`", ",", 
       "0.524213`", ",", "0.441264`"}], "}"}], ",", 
     RowBox[{"{", 
      RowBox[{
      "0.41`", ",", "0.5`", ",", "0.928124`", ",", "0.989223`", ",", 
       "0.532502`", ",", "0.44868`"}], "}"}], ",", 
     RowBox[{"{", 
      RowBox[{
      "0.42`", ",", "0.`", ",", "0.962684`", ",", "0.993777`", ",", 
       "0.0697467`", ",", "0.0571424`"}], "}"}], ",", 
     RowBox[{"{", 
      RowBox[{
      "0.42`", ",", "0.025`", ",", "0.98551`", ",", "0.989704`", ",", 
       "0.116363`", ",", "0.0906982`"}], "}"}], ",", 
     RowBox[{"{", 
      RowBox[{
      "0.42`", ",", "0.05`", ",", "0.987832`", ",", "0.983969`", ",", 
       "0.202286`", ",", "0.169563`"}], "}"}], ",", 
     RowBox[{"{", 
      RowBox[{
      "0.42`", ",", "0.075`", ",", "0.985069`", ",", "0.976979`", ",", 
       "0.262442`", ",", "0.224371`"}], "}"}], ",", 
     RowBox[{"{", 
      RowBox[{
      "0.42`", ",", "0.1`", ",", "0.981832`", ",", "0.96937`", ",", 
       "0.310448`", ",", "0.264063`"}], "}"}], ",", 
     RowBox[{"{", 
      RowBox[{
      "0.42`", ",", "0.125`", ",", "0.977034`", ",", "0.960108`", ",", 
       "0.344986`", ",", "0.294466`"}], "}"}], ",", 
     RowBox[{"{", 
      RowBox[{
      "0.42`", ",", "0.15`", ",", "0.973066`", ",", "0.958702`", ",", 
       "0.369843`", ",", "0.316811`"}], "}"}], ",", 
     RowBox[{"{", 
      RowBox[{
      "0.42`", ",", "0.175`", ",", "0.968139`", ",", "0.959794`", ",", 
       "0.391729`", ",", "0.336982`"}], "}"}], ",", 
     RowBox[{"{", 
      RowBox[{
      "0.42`", ",", "0.2`", ",", "0.965367`", ",", "0.961504`", ",", 
       "0.407678`", ",", "0.351465`"}], "}"}], ",", 
     RowBox[{"{", 
      RowBox[{
      "0.42`", ",", "0.225`", ",", "0.960646`", ",", "0.96399`", ",", 
       "0.421603`", ",", "0.363088`"}], "}"}], ",", 
     RowBox[{"{", 
      RowBox[{
      "0.42`", ",", "0.25`", ",", "0.956621`", ",", "0.966948`", ",", 
       "0.435177`", ",", "0.37486`"}], "}"}], ",", 
     RowBox[{"{", 
      RowBox[{
      "0.42`", ",", "0.275`", ",", "0.954082`", ",", "0.971444`", ",", 
       "0.447385`", ",", "0.385351`"}], "}"}], ",", 
     RowBox[{"{", 
      RowBox[{
      "0.42`", ",", "0.3`", ",", "0.949178`", ",", "0.975768`", ",", 
       "0.458933`", ",", "0.393076`"}], "}"}], ",", 
     RowBox[{"{", 
      RowBox[{
      "0.42`", ",", "0.325`", ",", "0.945716`", ",", "0.980279`", ",", 
       "0.469714`", ",", "0.401213`"}], "}"}], ",", 
     RowBox[{"{", 
      RowBox[{
      "0.42`", ",", "0.35`", ",", "0.94316`", ",", "0.984625`", ",", 
       "0.480777`", ",", "0.410131`"}], "}"}], ",", 
     RowBox[{"{", 
      RowBox[{
      "0.42`", ",", "0.375`", ",", "0.939366`", ",", "0.988948`", ",", 
       "0.490196`", ",", "0.416104`"}], "}"}], ",", 
     RowBox[{"{", 
      RowBox[{
      "0.42`", ",", "0.4`", ",", "0.937139`", ",", "0.989828`", ",", 
       "0.500517`", ",", "0.423502`"}], "}"}], ",", 
     RowBox[{"{", 
      RowBox[{
      "0.42`", ",", "0.425`", ",", "0.934375`", ",", "0.990692`", ",", 
       "0.508682`", ",", "0.429729`"}], "}"}], ",", 
     RowBox[{"{", 
      RowBox[{
      "0.42`", ",", "0.45`", ",", "0.93271`", ",", "0.989921`", ",", 
       "0.517026`", ",", "0.436704`"}], "}"}], ",", 
     RowBox[{"{", 
      RowBox[{
      "0.42`", ",", "0.475`", ",", "0.930297`", ",", "0.989915`", ",", 
       "0.529756`", ",", "0.44777`"}], "}"}], ",", 
     RowBox[{"{", 
      RowBox[{
      "0.42`", ",", "0.5`", ",", "0.928209`", ",", "0.989049`", ",", 
       "0.53381`", ",", "0.450667`"}], "}"}], ",", 
     RowBox[{"{", 
      RowBox[{
      "0.43`", ",", "0.`", ",", "0.963394`", ",", "0.99492`", ",", 
       "0.071966`", ",", "0.0592085`"}], "}"}], ",", 
     RowBox[{"{", 
      RowBox[{
      "0.43`", ",", "0.025`", ",", "0.985377`", ",", "0.989681`", ",", 
       "0.118978`", ",", "0.0925479`"}], "}"}], ",", 
     RowBox[{"{", 
      RowBox[{
      "0.43`", ",", "0.05`", ",", "0.987029`", ",", "0.983961`", ",", 
       "0.20503`", ",", "0.171446`"}], "}"}], ",", 
     RowBox[{"{", 
      RowBox[{
      "0.43`", ",", "0.075`", ",", "0.985077`", ",", "0.977041`", ",", 
       "0.263969`", ",", "0.225615`"}], "}"}], ",", 
     RowBox[{"{", 
      RowBox[{
      "0.43`", ",", "0.1`", ",", "0.981438`", ",", "0.969061`", ",", 
       "0.310017`", ",", "0.26356`"}], "}"}], ",", 
     RowBox[{"{", 
      RowBox[{
      "0.43`", ",", "0.125`", ",", "0.977311`", ",", "0.959894`", ",", 
       "0.344935`", ",", "0.29417`"}], "}"}], ",", 
     RowBox[{"{", 
      RowBox[{
      "0.43`", ",", "0.15`", ",", "0.973193`", ",", "0.958945`", ",", 
       "0.369909`", ",", "0.317115`"}], "}"}], ",", 
     RowBox[{"{", 
      RowBox[{
      "0.43`", ",", "0.175`", ",", "0.968588`", ",", "0.959748`", ",", 
       "0.39157`", ",", "0.336753`"}], "}"}], ",", 
     RowBox[{"{", 
      RowBox[{
      "0.43`", ",", "0.2`", ",", "0.965129`", ",", "0.960828`", ",", 
       "0.407087`", ",", "0.35123`"}], "}"}], ",", 
     RowBox[{"{", 
      RowBox[{
      "0.43`", ",", "0.225`", ",", "0.961076`", ",", "0.964386`", ",", 
       "0.421979`", ",", "0.363531`"}], "}"}], ",", 
     RowBox[{"{", 
      RowBox[{
      "0.43`", ",", "0.25`", ",", "0.957409`", ",", "0.9672`", ",", 
       "0.436506`", ",", "0.376567`"}], "}"}], ",", 
     RowBox[{"{", 
      RowBox[{
      "0.43`", ",", "0.275`", ",", "0.953503`", ",", "0.970482`", ",", 
       "0.44562`", ",", "0.383277`"}], "}"}], ",", 
     RowBox[{"{", 
      RowBox[{
      "0.43`", ",", "0.3`", ",", "0.949758`", ",", "0.974977`", ",", 
       "0.457491`", ",", "0.391984`"}], "}"}], ",", 
     RowBox[{"{", 
      RowBox[{
      "0.43`", ",", "0.325`", ",", "0.946997`", ",", "0.979265`", ",", 
       "0.467786`", ",", "0.400828`"}], "}"}], ",", 
     RowBox[{"{", 
      RowBox[{
      "0.43`", ",", "0.35`", ",", "0.942909`", ",", "0.98396`", ",", 
       "0.482014`", ",", "0.410925`"}], "}"}], ",", 
     RowBox[{"{", 
      RowBox[{
      "0.43`", ",", "0.375`", ",", "0.93999`", ",", "0.987279`", ",", 
       "0.488257`", ",", "0.41496`"}], "}"}], ",", 
     RowBox[{"{", 
      RowBox[{
      "0.43`", ",", "0.4`", ",", "0.937791`", ",", "0.98968`", ",", 
       "0.498375`", ",", "0.422414`"}], "}"}], ",", 
     RowBox[{"{", 
      RowBox[{
      "0.43`", ",", "0.425`", ",", "0.934914`", ",", "0.990894`", ",", 
       "0.509021`", ",", "0.430897`"}], "}"}], ",", 
     RowBox[{"{", 
      RowBox[{
      "0.43`", ",", "0.45`", ",", "0.933108`", ",", "0.989671`", ",", 
       "0.518046`", ",", "0.438381`"}], "}"}], ",", 
     RowBox[{"{", 
      RowBox[{
      "0.43`", ",", "0.475`", ",", "0.929469`", ",", "0.98929`", ",", 
       "0.527046`", ",", "0.444172`"}], "}"}], ",", 
     RowBox[{"{", 
      RowBox[{
      "0.43`", ",", "0.5`", ",", "0.929681`", ",", "0.989253`", ",", 
       "0.535115`", ",", "0.453309`"}], "}"}], ",", 
     RowBox[{"{", 
      RowBox[{
      "0.44`", ",", "0.`", ",", "0.959014`", ",", "0.993277`", ",", 
       "0.0729244`", ",", "0.0601879`"}], "}"}], ",", 
     RowBox[{"{", 
      RowBox[{
      "0.44`", ",", "0.025`", ",", "0.985228`", ",", "0.989738`", ",", 
       "0.119448`", ",", "0.0934981`"}], "}"}], ",", 
     RowBox[{"{", 
      RowBox[{
      "0.44`", ",", "0.05`", ",", "0.98791`", ",", "0.98448`", ",", 
       "0.203872`", ",", "0.170252`"}], "}"}], ",", 
     RowBox[{"{", 
      RowBox[{
      "0.44`", ",", "0.075`", ",", "0.985417`", ",", "0.97651`", ",", 
       "0.26446`", ",", "0.22629`"}], "}"}], ",", 
     RowBox[{"{", 
      RowBox[{
      "0.44`", ",", "0.1`", ",", "0.981419`", ",", "0.967711`", ",", 
       "0.312473`", ",", "0.265543`"}], "}"}], ",", 
     RowBox[{"{", 
      RowBox[{
      "0.44`", ",", "0.125`", ",", "0.977758`", ",", "0.959971`", ",", 
       "0.345804`", ",", "0.294796`"}], "}"}], ",", 
     RowBox[{"{", 
      RowBox[{
      "0.44`", ",", "0.15`", ",", "0.972757`", ",", "0.959175`", ",", 
       "0.372044`", ",", "0.31842`"}], "}"}], ",", 
     RowBox[{"{", 
      RowBox[{
      "0.44`", ",", "0.175`", ",", "0.969254`", ",", "0.959484`", ",", 
       "0.391455`", ",", "0.337034`"}], "}"}], ",", 
     RowBox[{"{", 
      RowBox[{
      "0.44`", ",", "0.2`", ",", "0.964936`", ",", "0.960642`", ",", 
       "0.4082`", ",", "0.351596`"}], "}"}], ",", 
     RowBox[{"{", 
      RowBox[{
      "0.44`", ",", "0.225`", ",", "0.960722`", ",", "0.9636`", ",", 
       "0.421872`", ",", "0.363463`"}], "}"}], ",", 
     RowBox[{"{", 
      RowBox[{
      "0.44`", ",", "0.25`", ",", "0.957818`", ",", "0.966808`", ",", 
       "0.435825`", ",", "0.375993`"}], "}"}], ",", 
     RowBox[{"{", 
      RowBox[{
      "0.44`", ",", "0.275`", ",", "0.954043`", ",", "0.970225`", ",", 
       "0.446501`", ",", "0.384303`"}], "}"}], ",", 
     RowBox[{"{", 
      RowBox[{
      "0.44`", ",", "0.3`", ",", "0.950846`", ",", "0.974512`", ",", 
       "0.457205`", ",", "0.393097`"}], "}"}], ",", 
     RowBox[{"{", 
      RowBox[{
      "0.44`", ",", "0.325`", ",", "0.946697`", ",", "0.979826`", ",", 
       "0.468448`", ",", "0.400986`"}], "}"}], ",", 
     RowBox[{"{", 
      RowBox[{
      "0.44`", ",", "0.35`", ",", "0.944472`", ",", "0.98398`", ",", 
       "0.47638`", ",", "0.407245`"}], "}"}], ",", 
     RowBox[{"{", 
      RowBox[{
      "0.44`", ",", "0.375`", ",", "0.941032`", ",", "0.987806`", ",", 
       "0.48684`", ",", "0.414297`"}], "}"}], ",", 
     RowBox[{"{", 
      RowBox[{
      "0.44`", ",", "0.4`", ",", "0.93804`", ",", "0.989427`", ",", 
       "0.498707`", ",", "0.423244`"}], "}"}], ",", 
     RowBox[{"{", 
      RowBox[{
      "0.44`", ",", "0.425`", ",", "0.934717`", ",", "0.99039`", ",", 
       "0.509593`", ",", "0.431246`"}], "}"}], ",", 
     RowBox[{"{", 
      RowBox[{
      "0.44`", ",", "0.45`", ",", "0.933039`", ",", "0.990051`", ",", 
       "0.516465`", ",", "0.436611`"}], "}"}], ",", 
     RowBox[{"{", 
      RowBox[{
      "0.44`", ",", "0.475`", ",", "0.930731`", ",", "0.989145`", ",", 
       "0.525996`", ",", "0.444777`"}], "}"}], ",", 
     RowBox[{"{", 
      RowBox[{
      "0.44`", ",", "0.5`", ",", "0.928692`", ",", "0.989148`", ",", 
       "0.532845`", ",", "0.449745`"}], "}"}], ",", 
     RowBox[{"{", 
      RowBox[{
      "0.45`", ",", "0.`", ",", "0.960384`", ",", "0.993433`", ",", 
       "0.076573`", ",", "0.0640956`"}], "}"}], ",", 
     RowBox[{"{", 
      RowBox[{
      "0.45`", ",", "0.025`", ",", "0.985036`", ",", "0.989898`", ",", 
       "0.124252`", ",", "0.0981248`"}], "}"}], ",", 
     RowBox[{"{", 
      RowBox[{
      "0.45`", ",", "0.05`", ",", "0.987401`", ",", "0.984623`", ",", 
       "0.20786`", ",", "0.174318`"}], "}"}], ",", 
     RowBox[{"{", 
      RowBox[{
      "0.45`", ",", "0.075`", ",", "0.985019`", ",", "0.975103`", ",", 
       "0.265367`", ",", "0.226149`"}], "}"}], ",", 
     RowBox[{"{", 
      RowBox[{
      "0.45`", ",", "0.1`", ",", "0.981872`", ",", "0.966892`", ",", 
       "0.312119`", ",", "0.265657`"}], "}"}], ",", 
     RowBox[{"{", 
      RowBox[{
      "0.45`", ",", "0.125`", ",", "0.977823`", ",", "0.959559`", ",", 
       "0.344413`", ",", "0.293583`"}], "}"}], ",", 
     RowBox[{"{", 
      RowBox[{
      "0.45`", ",", "0.15`", ",", "0.973264`", ",", "0.958738`", ",", 
       "0.370812`", ",", "0.317481`"}], "}"}], ",", 
     RowBox[{"{", 
      RowBox[{
      "0.45`", ",", "0.175`", ",", "0.969499`", ",", "0.959226`", ",", 
       "0.39069`", ",", "0.336116`"}], "}"}], ",", 
     RowBox[{"{", 
      RowBox[{
      "0.45`", ",", "0.2`", ",", "0.965178`", ",", "0.960096`", ",", 
       "0.409099`", ",", "0.352871`"}], "}"}], ",", 
     RowBox[{"{", 
      RowBox[{
      "0.45`", ",", "0.225`", ",", "0.961351`", ",", "0.962741`", ",", 
       "0.422824`", ",", "0.365108`"}], "}"}], ",", 
     RowBox[{"{", 
      RowBox[{
      "0.45`", ",", "0.25`", ",", "0.958965`", ",", "0.966316`", ",", 
       "0.434548`", ",", "0.375966`"}], "}"}], ",", 
     RowBox[{"{", 
      RowBox[{
      "0.45`", ",", "0.275`", ",", "0.954416`", ",", "0.970379`", ",", 
       "0.445347`", ",", "0.383484`"}], "}"}], ",", 
     RowBox[{"{", 
      RowBox[{
      "0.45`", ",", "0.3`", ",", "0.950933`", ",", "0.973833`", ",", 
       "0.457513`", ",", "0.393598`"}], "}"}], ",", 
     RowBox[{"{", 
      RowBox[{
      "0.45`", ",", "0.325`", ",", "0.946382`", ",", "0.978651`", ",", 
       "0.467493`", ",", "0.400077`"}], "}"}], ",", 
     RowBox[{"{", 
      RowBox[{
      "0.45`", ",", "0.35`", ",", "0.943894`", ",", "0.98391`", ",", 
       "0.478328`", ",", "0.408099`"}], "}"}], ",", 
     RowBox[{"{", 
      RowBox[{
      "0.45`", ",", "0.375`", ",", "0.941162`", ",", "0.987909`", ",", 
       "0.490494`", ",", "0.418298`"}], "}"}], ",", 
     RowBox[{"{", 
      RowBox[{
      "0.45`", ",", "0.4`", ",", "0.937288`", ",", "0.9897`", ",", "0.49972`",
        ",", "0.423812`"}], "}"}], ",", 
     RowBox[{"{", 
      RowBox[{
      "0.45`", ",", "0.425`", ",", "0.935313`", ",", "0.990108`", ",", 
       "0.50829`", ",", "0.430546`"}], "}"}], ",", 
     RowBox[{"{", 
      RowBox[{
      "0.45`", ",", "0.45`", ",", "0.932622`", ",", "0.990081`", ",", 
       "0.517752`", ",", "0.437048`"}], "}"}], ",", 
     RowBox[{"{", 
      RowBox[{
      "0.45`", ",", "0.475`", ",", "0.930439`", ",", "0.989428`", ",", 
       "0.525512`", ",", "0.443515`"}], "}"}], ",", 
     RowBox[{"{", 
      RowBox[{
      "0.45`", ",", "0.5`", ",", "0.929171`", ",", "0.98895`", ",", 
       "0.529193`", ",", "0.446698`"}], "}"}], ",", 
     RowBox[{"{", 
      RowBox[{
      "0.46`", ",", "0.`", ",", "0.95864`", ",", "0.993477`", ",", 
       "0.0778727`", ",", "0.0657122`"}], "}"}], ",", 
     RowBox[{"{", 
      RowBox[{
      "0.46`", ",", "0.025`", ",", "0.984608`", ",", "0.990171`", ",", 
       "0.126695`", ",", "0.100162`"}], "}"}], ",", 
     RowBox[{"{", 
      RowBox[{
      "0.46`", ",", "0.05`", ",", "0.987612`", ",", "0.984783`", ",", 
       "0.208418`", ",", "0.174961`"}], "}"}], ",", 
     RowBox[{"{", 
      RowBox[{
      "0.46`", ",", "0.075`", ",", "0.985176`", ",", "0.975317`", ",", 
       "0.267738`", ",", "0.228706`"}], "}"}], ",", 
     RowBox[{"{", 
      RowBox[{
      "0.46`", ",", "0.1`", ",", "0.982205`", ",", "0.965289`", ",", 
       "0.311457`", ",", "0.265144`"}], "}"}], ",", 
     RowBox[{"{", 
      RowBox[{
      "0.46`", ",", "0.125`", ",", "0.97723`", ",", "0.960163`", ",", 
       "0.345625`", ",", "0.294005`"}], "}"}], ",", 
     RowBox[{"{", 
      RowBox[{
      "0.46`", ",", "0.15`", ",", "0.973126`", ",", "0.958946`", ",", 
       "0.371951`", ",", "0.31833`"}], "}"}], ",", 
     RowBox[{"{", 
      RowBox[{
      "0.46`", ",", "0.175`", ",", "0.968823`", ",", "0.959373`", ",", 
       "0.391726`", ",", "0.336746`"}], "}"}], ",", 
     RowBox[{"{", 
      RowBox[{
      "0.46`", ",", "0.2`", ",", "0.965486`", ",", "0.960094`", ",", 
       "0.407618`", ",", "0.351632`"}], "}"}], ",", 
     RowBox[{"{", 
      RowBox[{
      "0.46`", ",", "0.225`", ",", "0.961735`", ",", "0.962852`", ",", 
       "0.423809`", ",", "0.365779`"}], "}"}], ",", 
     RowBox[{"{", 
      RowBox[{
      "0.46`", ",", "0.25`", ",", "0.958096`", ",", "0.965643`", ",", 
       "0.435137`", ",", "0.375652`"}], "}"}], ",", 
     RowBox[{"{", 
      RowBox[{
      "0.46`", ",", "0.275`", ",", "0.955182`", ",", "0.970164`", ",", 
       "0.44707`", ",", "0.385705`"}], "}"}], ",", 
     RowBox[{"{", 
      RowBox[{
      "0.46`", ",", "0.3`", ",", "0.951415`", ",", "0.973783`", ",", 
       "0.459621`", ",", "0.395659`"}], "}"}], ",", 
     RowBox[{"{", 
      RowBox[{
      "0.46`", ",", "0.325`", ",", "0.947888`", ",", "0.97886`", ",", 
       "0.468818`", ",", "0.40255`"}], "}"}], ",", 
     RowBox[{"{", 
      RowBox[{
      "0.46`", ",", "0.35`", ",", "0.943915`", ",", "0.982783`", ",", 
       "0.478476`", ",", "0.408496`"}], "}"}], ",", 
     RowBox[{"{", 
      RowBox[{
      "0.46`", ",", "0.375`", ",", "0.940776`", ",", "0.987612`", ",", 
       "0.490089`", ",", "0.417168`"}], "}"}], ",", 
     RowBox[{"{", 
      RowBox[{
      "0.46`", ",", "0.4`", ",", "0.938066`", ",", "0.989158`", ",", 
       "0.496805`", ",", "0.421263`"}], "}"}], ",", 
     RowBox[{"{", 
      RowBox[{
      "0.46`", ",", "0.425`", ",", "0.936293`", ",", "0.990105`", ",", 
       "0.507632`", ",", "0.430932`"}], "}"}], ",", 
     RowBox[{"{", 
      RowBox[{
      "0.46`", ",", "0.45`", ",", "0.933178`", ",", "0.990276`", ",", 
       "0.516606`", ",", "0.436486`"}], "}"}], ",", 
     RowBox[{"{", 
      RowBox[{
      "0.46`", ",", "0.475`", ",", "0.931429`", ",", "0.989601`", ",", 
       "0.525667`", ",", "0.44477`"}], "}"}], ",", 
     RowBox[{"{", 
      RowBox[{
      "0.46`", ",", "0.5`", ",", "0.929891`", ",", "0.989035`", ",", 
       "0.532768`", ",", "0.450803`"}], "}"}], ",", 
     RowBox[{"{", 
      RowBox[{
      "0.47`", ",", "0.`", ",", "0.961155`", ",", "0.993907`", ",", 
       "0.079902`", ",", "0.0681343`"}], "}"}], ",", 
     RowBox[{"{", 
      RowBox[{
      "0.47`", ",", "0.025`", ",", "0.984494`", ",", "0.990327`", ",", 
       "0.13137`", ",", "0.10513`"}], "}"}], ",", 
     RowBox[{"{", 
      RowBox[{
      "0.47`", ",", "0.05`", ",", "0.987727`", ",", "0.984814`", ",", 
       "0.210742`", ",", "0.17646`"}], "}"}], ",", 
     RowBox[{"{", 
      RowBox[{
      "0.47`", ",", "0.075`", ",", "0.985612`", ",", "0.974268`", ",", 
       "0.268609`", ",", "0.229606`"}], "}"}], ",", 
     RowBox[{"{", 
      RowBox[{
      "0.47`", ",", "0.1`", ",", "0.981266`", ",", "0.964741`", ",", 
       "0.312327`", ",", "0.264606`"}], "}"}], ",", 
     RowBox[{"{", 
      RowBox[{
      "0.47`", ",", "0.125`", ",", "0.977307`", ",", "0.959992`", ",", 
       "0.347628`", ",", "0.295504`"}], "}"}], ",", 
     RowBox[{"{", 
      RowBox[{
      "0.47`", ",", "0.15`", ",", "0.973058`", ",", "0.958772`", ",", 
       "0.370887`", ",", "0.316994`"}], "}"}], ",", 
     RowBox[{"{", 
      RowBox[{
      "0.47`", ",", "0.175`", ",", "0.969087`", ",", "0.959056`", ",", 
       "0.39198`", ",", "0.336384`"}], "}"}], ",", 
     RowBox[{"{", 
      RowBox[{
      "0.47`", ",", "0.2`", ",", "0.965952`", ",", "0.960248`", ",", 
       "0.409613`", ",", "0.35332`"}], "}"}], ",", 
     RowBox[{"{", 
      RowBox[{
      "0.47`", ",", "0.225`", ",", "0.961299`", ",", "0.962742`", ",", 
       "0.422212`", ",", "0.363725`"}], "}"}], ",", 
     RowBox[{"{", 
      RowBox[{
      "0.47`", ",", "0.25`", ",", "0.95843`", ",", "0.965311`", ",", 
       "0.434645`", ",", "0.375392`"}], "}"}], ",", 
     RowBox[{"{", 
      RowBox[{
      "0.47`", ",", "0.275`", ",", "0.954564`", ",", "0.968901`", ",", 
       "0.444217`", ",", "0.38282`"}], "}"}], ",", 
     RowBox[{"{", 
      RowBox[{
      "0.47`", ",", "0.3`", ",", "0.951923`", ",", "0.973836`", ",", 
       "0.45832`", ",", "0.394962`"}], "}"}], ",", 
     RowBox[{"{", 
      RowBox[{
      "0.47`", ",", "0.325`", ",", "0.947673`", ",", "0.978395`", ",", 
       "0.470093`", ",", "0.403321`"}], "}"}], ",", 
     RowBox[{"{", 
      RowBox[{
      "0.47`", ",", "0.35`", ",", "0.944607`", ",", "0.982508`", ",", 
       "0.478229`", ",", "0.409126`"}], "}"}], ",", 
     RowBox[{"{", 
      RowBox[{
      "0.47`", ",", "0.375`", ",", "0.940814`", ",", "0.986391`", ",", 
       "0.489686`", ",", "0.41725`"}], "}"}], ",", 
     RowBox[{"{", 
      RowBox[{
      "0.47`", ",", "0.4`", ",", "0.938058`", ",", "0.989463`", ",", 
       "0.496946`", ",", "0.421761`"}], "}"}], ",", 
     RowBox[{"{", 
      RowBox[{
      "0.47`", ",", "0.425`", ",", "0.935622`", ",", "0.990018`", ",", 
       "0.509348`", ",", "0.432211`"}], "}"}], ",", 
     RowBox[{"{", 
      RowBox[{
      "0.47`", ",", "0.45`", ",", "0.934336`", ",", "0.990259`", ",", 
       "0.516746`", ",", "0.437911`"}], "}"}], ",", 
     RowBox[{"{", 
      RowBox[{
      "0.47`", ",", "0.475`", ",", "0.931937`", ",", "0.989175`", ",", 
       "0.524974`", ",", "0.444757`"}], "}"}], ",", 
     RowBox[{"{", 
      RowBox[{
      "0.47`", ",", "0.5`", ",", "0.929087`", ",", "0.98904`", ",", 
       "0.531477`", ",", "0.449076`"}], "}"}], ",", 
     RowBox[{"{", 
      RowBox[{
      "0.48`", ",", "0.`", ",", "0.958499`", ",", "0.994422`", ",", 
       "0.084585`", ",", "0.0726999`"}], "}"}], ",", 
     RowBox[{"{", 
      RowBox[{
      "0.48`", ",", "0.025`", ",", "0.98415`", ",", "0.990055`", ",", 
       "0.134544`", ",", "0.107222`"}], "}"}], ",", 
     RowBox[{"{", 
      RowBox[{
      "0.48`", ",", "0.05`", ",", "0.987598`", ",", "0.98448`", ",", 
       "0.21273`", ",", "0.178372`"}], "}"}], ",", 
     RowBox[{"{", 
      RowBox[{
      "0.48`", ",", "0.075`", ",", "0.985519`", ",", "0.974276`", ",", 
       "0.26834`", ",", "0.229007`"}], "}"}], ",", 
     RowBox[{"{", 
      RowBox[{
      "0.48`", ",", "0.1`", ",", "0.982309`", ",", "0.964319`", ",", 
       "0.312312`", ",", "0.264994`"}], "}"}], ",", 
     RowBox[{"{", 
      RowBox[{
      "0.48`", ",", "0.125`", ",", "0.977707`", ",", "0.960201`", ",", 
       "0.346497`", ",", "0.295025`"}], "}"}], ",", 
     RowBox[{"{", 
      RowBox[{
      "0.48`", ",", "0.15`", ",", "0.973732`", ",", "0.958906`", ",", 
       "0.373888`", ",", "0.320191`"}], "}"}], ",", 
     RowBox[{"{", 
      RowBox[{
      "0.48`", ",", "0.175`", ",", "0.969868`", ",", "0.958804`", ",", 
       "0.390893`", ",", "0.336079`"}], "}"}], ",", 
     RowBox[{"{", 
      RowBox[{
      "0.48`", ",", "0.2`", ",", "0.965883`", ",", "0.9596`", ",", 
       "0.407255`", ",", "0.350864`"}], "}"}], ",", 
     RowBox[{"{", 
      RowBox[{
      "0.48`", ",", "0.225`", ",", "0.962641`", ",", "0.961918`", ",", 
       "0.423177`", ",", "0.366053`"}], "}"}], ",", 
     RowBox[{"{", 
      RowBox[{
      "0.48`", ",", "0.25`", ",", "0.958776`", ",", "0.965429`", ",", 
       "0.435515`", ",", "0.375678`"}], "}"}], ",", 
     RowBox[{"{", 
      RowBox[{
      "0.48`", ",", "0.275`", ",", "0.954876`", ",", "0.969512`", ",", 
       "0.446557`", ",", "0.38469`"}], "}"}], ",", 
     RowBox[{"{", 
      RowBox[{
      "0.48`", ",", "0.3`", ",", "0.951473`", ",", "0.972698`", ",", 
       "0.45472`", ",", "0.390628`"}], "}"}], ",", 
     RowBox[{"{", 
      RowBox[{
      "0.48`", ",", "0.325`", ",", "0.948197`", ",", "0.977399`", ",", 
       "0.46423`", ",", "0.398376`"}], "}"}], ",", 
     RowBox[{"{", 
      RowBox[{
      "0.48`", ",", "0.35`", ",", "0.944823`", ",", "0.981925`", ",", 
       "0.476939`", ",", "0.408522`"}], "}"}], ",", 
     RowBox[{"{", 
      RowBox[{
      "0.48`", ",", "0.375`", ",", "0.940976`", ",", "0.986628`", ",", 
       "0.488294`", ",", "0.416291`"}], "}"}], ",", 
     RowBox[{"{", 
      RowBox[{
      "0.48`", ",", "0.4`", ",", "0.937989`", ",", "0.989011`", ",", 
       "0.49766`", ",", "0.422453`"}], "}"}], ",", 
     RowBox[{"{", 
      RowBox[{
      "0.48`", ",", "0.425`", ",", "0.936625`", ",", "0.989869`", ",", 
       "0.505943`", ",", "0.4295`"}], "}"}], ",", 
     RowBox[{"{", 
      RowBox[{
      "0.48`", ",", "0.45`", ",", "0.934957`", ",", "0.989947`", ",", 
       "0.516634`", ",", "0.439023`"}], "}"}], ",", 
     RowBox[{"{", 
      RowBox[{
      "0.48`", ",", "0.475`", ",", "0.930906`", ",", "0.98935`", ",", 
       "0.523535`", ",", "0.442177`"}], "}"}], ",", 
     RowBox[{"{", 
      RowBox[{
      "0.48`", ",", "0.5`", ",", "0.929002`", ",", "0.989168`", ",", 
       "0.529511`", ",", "0.447145`"}], "}"}], ",", 
     RowBox[{"{", 
      RowBox[{
      "0.49`", ",", "0.`", ",", "0.95604`", ",", "0.994146`", ",", 
       "0.0883757`", ",", "0.0759735`"}], "}"}], ",", 
     RowBox[{"{", 
      RowBox[{
      "0.49`", ",", "0.025`", ",", "0.984686`", ",", "0.990178`", ",", 
       "0.137812`", ",", "0.110649`"}], "}"}], ",", 
     RowBox[{"{", 
      RowBox[{
      "0.49`", ",", "0.05`", ",", "0.988056`", ",", "0.984536`", ",", 
       "0.212192`", ",", "0.178731`"}], "}"}], ",", 
     RowBox[{"{", 
      RowBox[{
      "0.49`", ",", "0.075`", ",", "0.985214`", ",", "0.974225`", ",", 
       "0.269008`", ",", "0.229162`"}], "}"}], ",", 
     RowBox[{"{", 
      RowBox[{
      "0.49`", ",", "0.1`", ",", "0.98239`", ",", "0.964608`", ",", 
       "0.313208`", ",", "0.26585`"}], "}"}], ",", 
     RowBox[{"{", 
      RowBox[{
      "0.49`", ",", "0.125`", ",", "0.977671`", ",", "0.959462`", ",", 
       "0.346415`", ",", "0.293798`"}], "}"}], ",", 
     RowBox[{"{", 
      RowBox[{
      "0.49`", ",", "0.15`", ",", "0.973156`", ",", "0.958962`", ",", 
       "0.372004`", ",", "0.318227`"}], "}"}], ",", 
     RowBox[{"{", 
      RowBox[{
      "0.49`", ",", "0.175`", ",", "0.969329`", ",", "0.958774`", ",", 
       "0.394267`", ",", "0.338685`"}], "}"}], ",", 
     RowBox[{"{", 
      RowBox[{
      "0.49`", ",", "0.2`", ",", "0.965783`", ",", "0.959393`", ",", 
       "0.410353`", ",", "0.354018`"}], "}"}], ",", 
     RowBox[{"{", 
      RowBox[{
      "0.49`", ",", "0.225`", ",", "0.962189`", ",", "0.962306`", ",", 
       "0.424694`", ",", "0.366558`"}], "}"}], ",", 
     RowBox[{"{", 
      RowBox[{
      "0.49`", ",", "0.25`", ",", "0.958462`", ",", "0.965136`", ",", 
       "0.43421`", ",", "0.374225`"}], "}"}], ",", 
     RowBox[{"{", 
      RowBox[{
      "0.49`", ",", "0.275`", ",", "0.955003`", ",", "0.968686`", ",", 
       "0.445914`", ",", "0.384445`"}], "}"}], ",", 
     RowBox[{"{", 
      RowBox[{
      "0.49`", ",", "0.3`", ",", "0.951232`", ",", "0.972979`", ",", 
       "0.458186`", ",", "0.394343`"}], "}"}], ",", 
     RowBox[{"{", 
      RowBox[{
      "0.49`", ",", "0.325`", ",", "0.947932`", ",", "0.976699`", ",", 
       "0.466863`", ",", "0.400826`"}], "}"}], ",", 
     RowBox[{"{", 
      RowBox[{
      "0.49`", ",", "0.35`", ",", "0.945652`", ",", "0.982042`", ",", 
       "0.476838`", ",", "0.408799`"}], "}"}], ",", 
     RowBox[{"{", 
      RowBox[{
      "0.49`", ",", "0.375`", ",", "0.941665`", ",", "0.98627`", ",", 
       "0.489254`", ",", "0.41744`"}], "}"}], ",", 
     RowBox[{"{", 
      RowBox[{
      "0.49`", ",", "0.4`", ",", "0.939375`", ",", "0.988819`", ",", 
       "0.496615`", ",", "0.422512`"}], "}"}], ",", 
     RowBox[{"{", 
      RowBox[{
      "0.49`", ",", "0.425`", ",", "0.93682`", ",", "0.989706`", ",", 
       "0.505916`", ",", "0.429659`"}], "}"}], ",", 
     RowBox[{"{", 
      RowBox[{
      "0.49`", ",", "0.45`", ",", "0.934156`", ",", "0.990583`", ",", 
       "0.516192`", ",", "0.437497`"}], "}"}], ",", 
     RowBox[{"{", 
      RowBox[{
      "0.49`", ",", "0.475`", ",", "0.931147`", ",", "0.98914`", ",", 
       "0.526059`", ",", "0.444843`"}], "}"}], ",", 
     RowBox[{"{", 
      RowBox[{
      "0.49`", ",", "0.5`", ",", "0.930379`", ",", "0.989106`", ",", 
       "0.530363`", ",", "0.449372`"}], "}"}], ",", 
     RowBox[{"{", 
      RowBox[{
      "0.5`", ",", "0.`", ",", "0.960797`", ",", "0.99494`", ",", 
       "0.0865711`", ",", "0.0751755`"}], "}"}], ",", 
     RowBox[{"{", 
      RowBox[{
      "0.5`", ",", "0.025`", ",", "0.984586`", ",", "0.989928`", ",", 
       "0.140798`", ",", "0.113149`"}], "}"}], ",", 
     RowBox[{"{", 
      RowBox[{
      "0.5`", ",", "0.05`", ",", "0.988106`", ",", "0.984016`", ",", 
       "0.214111`", ",", "0.180366`"}], "}"}], ",", 
     RowBox[{"{", 
      RowBox[{
      "0.5`", ",", "0.075`", ",", "0.98526`", ",", "0.974204`", ",", 
       "0.270742`", ",", "0.230733`"}], "}"}], ",", 
     RowBox[{"{", 
      RowBox[{
      "0.5`", ",", "0.1`", ",", "0.982191`", ",", "0.96467`", ",", 
       "0.313254`", ",", "0.265268`"}], "}"}], ",", 
     RowBox[{"{", 
      RowBox[{
      "0.5`", ",", "0.125`", ",", "0.977154`", ",", "0.959509`", ",", 
       "0.348263`", ",", "0.296269`"}], "}"}], ",", 
     RowBox[{"{", 
      RowBox[{
      "0.5`", ",", "0.15`", ",", "0.97371`", ",", "0.958752`", ",", 
       "0.373426`", ",", "0.31953`"}], "}"}], ",", 
     RowBox[{"{", 
      RowBox[{
      "0.5`", ",", "0.175`", ",", "0.969474`", ",", "0.958868`", ",", 
       "0.395047`", ",", "0.33962`"}], "}"}], ",", 
     RowBox[{"{", 
      RowBox[{
      "0.5`", ",", "0.2`", ",", "0.966434`", ",", "0.959577`", ",", 
       "0.409937`", ",", "0.353867`"}], "}"}], ",", 
     RowBox[{"{", 
      RowBox[{
      "0.5`", ",", "0.225`", ",", "0.96227`", ",", "0.961831`", ",", 
       "0.424156`", ",", "0.366166`"}], "}"}], ",", 
     RowBox[{"{", 
      RowBox[{
      "0.5`", ",", "0.25`", ",", "0.959594`", ",", "0.964815`", ",", 
       "0.434253`", ",", "0.37612`"}], "}"}], ",", 
     RowBox[{"{", 
      RowBox[{
      "0.5`", ",", "0.275`", ",", "0.956203`", ",", "0.968487`", ",", 
       "0.446021`", ",", "0.385528`"}], "}"}], ",", 
     RowBox[{"{", 
      RowBox[{
      "0.5`", ",", "0.3`", ",", "0.95207`", ",", "0.972539`", ",", 
       "0.456136`", ",", "0.392803`"}], "}"}], ",", 
     RowBox[{"{", 
      RowBox[{
      "0.5`", ",", "0.325`", ",", "0.948522`", ",", "0.977521`", ",", 
       "0.465603`", ",", "0.399879`"}], "}"}], ",", 
     RowBox[{"{", 
      RowBox[{
      "0.5`", ",", "0.35`", ",", "0.944989`", ",", "0.981395`", ",", 
       "0.475366`", ",", "0.407263`"}], "}"}], ",", 
     RowBox[{"{", 
      RowBox[{
      "0.5`", ",", "0.375`", ",", "0.942174`", ",", "0.98543`", ",", 
       "0.488226`", ",", "0.417278`"}], "}"}], ",", 
     RowBox[{"{", 
      RowBox[{
      "0.5`", ",", "0.4`", ",", "0.939561`", ",", "0.989012`", ",", 
       "0.497794`", ",", "0.424346`"}], "}"}], ",", 
     RowBox[{"{", 
      RowBox[{
      "0.5`", ",", "0.425`", ",", "0.936168`", ",", "0.99026`", ",", 
       "0.509651`", ",", "0.43248`"}], "}"}], ",", 
     RowBox[{"{", 
      RowBox[{
      "0.5`", ",", "0.45`", ",", "0.935216`", ",", "0.990611`", ",", 
       "0.51409`", ",", "0.436752`"}], "}"}], ",", 
     RowBox[{"{", 
      RowBox[{
      "0.5`", ",", "0.475`", ",", "0.932591`", ",", "0.9892`", ",", 
       "0.524017`", ",", "0.44422`"}], "}"}], ",", 
     RowBox[{"{", 
      RowBox[{
      "0.5`", ",", "0.5`", ",", "0.930116`", ",", "0.98946`", ",", 
       "0.529574`", ",", "0.448074`"}], "}"}], ",", 
     RowBox[{"{", 
      RowBox[{
      "0.51`", ",", "0.`", ",", "0.954039`", ",", "0.993049`", ",", 
       "0.0886664`", ",", "0.0773794`"}], "}"}], ",", 
     RowBox[{"{", 
      RowBox[{
      "0.51`", ",", "0.025`", ",", "0.98527`", ",", "0.990048`", ",", 
       "0.143391`", ",", "0.115959`"}], "}"}], ",", 
     RowBox[{"{", 
      RowBox[{
      "0.51`", ",", "0.05`", ",", "0.98818`", ",", "0.983619`", ",", 
       "0.214751`", ",", "0.18052`"}], "}"}], ",", 
     RowBox[{"{", 
      RowBox[{
      "0.51`", ",", "0.075`", ",", "0.985596`", ",", "0.974633`", ",", 
       "0.270038`", ",", "0.229924`"}], "}"}], ",", 
     RowBox[{"{", 
      RowBox[{
      "0.51`", ",", "0.1`", ",", "0.982029`", ",", "0.963995`", ",", 
       "0.313532`", ",", "0.265481`"}], "}"}], ",", 
     RowBox[{"{", 
      RowBox[{
      "0.51`", ",", "0.125`", ",", "0.977869`", ",", "0.959675`", ",", 
       "0.347408`", ",", "0.294977`"}], "}"}], ",", 
     RowBox[{"{", 
      RowBox[{
      "0.51`", ",", "0.15`", ",", "0.973337`", ",", "0.958762`", ",", 
       "0.375072`", ",", "0.320499`"}], "}"}], ",", 
     RowBox[{"{", 
      RowBox[{
      "0.51`", ",", "0.175`", ",", "0.969329`", ",", "0.958665`", ",", 
       "0.396055`", ",", "0.340906`"}], "}"}], ",", 
     RowBox[{"{", 
      RowBox[{
      "0.51`", ",", "0.2`", ",", "0.966513`", ",", "0.959291`", ",", 
       "0.411683`", ",", "0.356195`"}], "}"}], ",", 
     RowBox[{"{", 
      RowBox[{
      "0.51`", ",", "0.225`", ",", "0.96285`", ",", "0.961637`", ",", 
       "0.422815`", ",", "0.365823`"}], "}"}], ",", 
     RowBox[{"{", 
      RowBox[{
      "0.51`", ",", "0.25`", ",", "0.958936`", ",", "0.96465`", ",", 
       "0.435311`", ",", "0.375921`"}], "}"}], ",", 
     RowBox[{"{", 
      RowBox[{
      "0.51`", ",", "0.275`", ",", "0.955959`", ",", "0.967737`", ",", 
       "0.445208`", ",", "0.384532`"}], "}"}], ",", 
     RowBox[{"{", 
      RowBox[{
      "0.51`", ",", "0.3`", ",", "0.952075`", ",", "0.971995`", ",", 
       "0.458522`", ",", "0.395178`"}], "}"}], ",", 
     RowBox[{"{", 
      RowBox[{
      "0.51`", ",", "0.325`", ",", "0.949445`", ",", "0.977477`", ",", 
       "0.466056`", ",", "0.401223`"}], "}"}], ",", 
     RowBox[{"{", 
      RowBox[{
      "0.51`", ",", "0.35`", ",", "0.945921`", ",", "0.981441`", ",", 
       "0.479412`", ",", "0.412436`"}], "}"}], ",", 
     RowBox[{"{", 
      RowBox[{
      "0.51`", ",", "0.375`", ",", "0.941989`", ",", "0.985471`", ",", 
       "0.488431`", ",", "0.41745`"}], "}"}], ",", 
     RowBox[{"{", 
      RowBox[{
      "0.51`", ",", "0.4`", ",", "0.939804`", ",", "0.988086`", ",", 
       "0.496211`", ",", "0.42285`"}], "}"}], ",", 
     RowBox[{"{", 
      RowBox[{
      "0.51`", ",", "0.425`", ",", "0.936523`", ",", "0.989758`", ",", 
       "0.505025`", ",", "0.428684`"}], "}"}], ",", 
     RowBox[{"{", 
      RowBox[{
      "0.51`", ",", "0.45`", ",", "0.93394`", ",", "0.990229`", ",", 
       "0.516025`", ",", "0.437373`"}], "}"}], ",", 
     RowBox[{"{", 
      RowBox[{
      "0.51`", ",", "0.475`", ",", "0.932707`", ",", "0.989672`", ",", 
       "0.52347`", ",", "0.443814`"}], "}"}], ",", 
     RowBox[{"{", 
      RowBox[{
      "0.51`", ",", "0.5`", ",", "0.930329`", ",", "0.989365`", ",", 
       "0.531572`", ",", "0.45017`"}], "}"}], ",", 
     RowBox[{"{", 
      RowBox[{
      "0.52`", ",", "0.`", ",", "0.955299`", ",", "0.992467`", ",", 
       "0.0932497`", ",", "0.0808522`"}], "}"}], ",", 
     RowBox[{"{", 
      RowBox[{
      "0.52`", ",", "0.025`", ",", "0.985315`", ",", "0.989828`", ",", 
       "0.144163`", ",", "0.116859`"}], "}"}], ",", 
     RowBox[{"{", 
      RowBox[{
      "0.52`", ",", "0.05`", ",", "0.988664`", ",", "0.983777`", ",", 
       "0.217733`", ",", "0.184019`"}], "}"}], ",", 
     RowBox[{"{", 
      RowBox[{
      "0.52`", ",", "0.075`", ",", "0.986023`", ",", "0.975271`", ",", 
       "0.271396`", ",", "0.23129`"}], "}"}], ",", 
     RowBox[{"{", 
      RowBox[{
      "0.52`", ",", "0.1`", ",", "0.981901`", ",", "0.964837`", ",", 
       "0.316172`", ",", "0.267571`"}], "}"}], ",", 
     RowBox[{"{", 
      RowBox[{
      "0.52`", ",", "0.125`", ",", "0.977846`", ",", "0.960134`", ",", 
       "0.349179`", ",", "0.295959`"}], "}"}], ",", 
     RowBox[{"{", 
      RowBox[{
      "0.52`", ",", "0.15`", ",", "0.974154`", ",", "0.958769`", ",", 
       "0.372331`", ",", "0.317718`"}], "}"}], ",", 
     RowBox[{"{", 
      RowBox[{
      "0.52`", ",", "0.175`", ",", "0.969453`", ",", "0.957922`", ",", 
       "0.394364`", ",", "0.338697`"}], "}"}], ",", 
     RowBox[{"{", 
      RowBox[{
      "0.52`", ",", "0.2`", ",", "0.96622`", ",", "0.959198`", ",", 
       "0.40968`", ",", "0.353425`"}], "}"}], ",", 
     RowBox[{"{", 
      RowBox[{
      "0.52`", ",", "0.225`", ",", "0.962538`", ",", "0.961673`", ",", 
       "0.424257`", ",", "0.366478`"}], "}"}], ",", 
     RowBox[{"{", 
      RowBox[{
      "0.52`", ",", "0.25`", ",", "0.959612`", ",", "0.964556`", ",", 
       "0.435257`", ",", "0.376596`"}], "}"}], ",", 
     RowBox[{"{", 
      RowBox[{
      "0.52`", ",", "0.275`", ",", "0.955624`", ",", "0.967814`", ",", 
       "0.4445`", ",", "0.383515`"}], "}"}], ",", 
     RowBox[{"{", 
      RowBox[{
      "0.52`", ",", "0.3`", ",", "0.952241`", ",", "0.971647`", ",", 
       "0.457863`", ",", "0.394993`"}], "}"}], ",", 
     RowBox[{"{", 
      RowBox[{
      "0.52`", ",", "0.325`", ",", "0.948749`", ",", "0.976042`", ",", 
       "0.466751`", ",", "0.40141`"}], "}"}], ",", 
     RowBox[{"{", 
      RowBox[{
      "0.52`", ",", "0.35`", ",", "0.946961`", ",", "0.981051`", ",", 
       "0.474274`", ",", "0.407622`"}], "}"}], ",", 
     RowBox[{"{", 
      RowBox[{
      "0.52`", ",", "0.375`", ",", "0.942495`", ",", "0.985324`", ",", 
       "0.484318`", ",", "0.413657`"}], "}"}], ",", 
     RowBox[{"{", 
      RowBox[{
      "0.52`", ",", "0.4`", ",", "0.939948`", ",", "0.988913`", ",", 
       "0.494424`", ",", "0.421334`"}], "}"}], ",", 
     RowBox[{"{", 
      RowBox[{
      "0.52`", ",", "0.425`", ",", "0.937104`", ",", "0.989675`", ",", 
       "0.503949`", ",", "0.428608`"}], "}"}], ",", 
     RowBox[{"{", 
      RowBox[{
      "0.52`", ",", "0.45`", ",", "0.935154`", ",", "0.99055`", ",", 
       "0.516308`", ",", "0.438541`"}], "}"}], ",", 
     RowBox[{"{", 
      RowBox[{
      "0.52`", ",", "0.475`", ",", "0.932382`", ",", "0.989592`", ",", 
       "0.523399`", ",", "0.44297`"}], "}"}], ",", 
     RowBox[{"{", 
      RowBox[{
      "0.52`", ",", "0.5`", ",", "0.930126`", ",", "0.98899`", ",", 
       "0.530565`", ",", "0.448896`"}], "}"}], ",", 
     RowBox[{"{", 
      RowBox[{
      "0.53`", ",", "0.`", ",", "0.957388`", ",", "0.992276`", ",", 
       "0.0961549`", ",", "0.0832754`"}], "}"}], ",", 
     RowBox[{"{", 
      RowBox[{
      "0.53`", ",", "0.025`", ",", "0.98589`", ",", "0.990129`", ",", 
       "0.145608`", ",", "0.118355`"}], "}"}], ",", 
     RowBox[{"{", 
      RowBox[{
      "0.53`", ",", "0.05`", ",", "0.988588`", ",", "0.984188`", ",", 
       "0.218266`", ",", "0.185072`"}], "}"}], ",", 
     RowBox[{"{", 
      RowBox[{
      "0.53`", ",", "0.075`", ",", "0.986556`", ",", "0.975952`", ",", 
       "0.271609`", ",", "0.231728`"}], "}"}], ",", 
     RowBox[{"{", 
      RowBox[{
      "0.53`", ",", "0.1`", ",", "0.982466`", ",", "0.96395`", ",", 
       "0.314663`", ",", "0.265535`"}], "}"}], ",", 
     RowBox[{"{", 
      RowBox[{
      "0.53`", ",", "0.125`", ",", "0.977913`", ",", "0.95982`", ",", 
       "0.34863`", ",", "0.296465`"}], "}"}], ",", 
     RowBox[{"{", 
      RowBox[{
      "0.53`", ",", "0.15`", ",", "0.97334`", ",", "0.958775`", ",", 
       "0.376387`", ",", "0.320882`"}], "}"}], ",", 
     RowBox[{"{", 
      RowBox[{
      "0.53`", ",", "0.175`", ",", "0.970362`", ",", "0.95779`", ",", 
       "0.395295`", ",", "0.340378`"}], "}"}], ",", 
     RowBox[{"{", 
      RowBox[{
      "0.53`", ",", "0.2`", ",", "0.966412`", ",", "0.959195`", ",", 
       "0.411814`", ",", "0.355713`"}], "}"}], ",", 
     RowBox[{"{", 
      RowBox[{
      "0.53`", ",", "0.225`", ",", "0.962484`", ",", "0.960848`", ",", 
       "0.424199`", ",", "0.366302`"}], "}"}], ",", 
     RowBox[{"{", 
      RowBox[{
      "0.53`", ",", "0.25`", ",", "0.959416`", ",", "0.963739`", ",", 
       "0.433605`", ",", "0.374683`"}], "}"}], ",", 
     RowBox[{"{", 
      RowBox[{
      "0.53`", ",", "0.275`", ",", "0.956277`", ",", "0.967018`", ",", 
       "0.44604`", ",", "0.385762`"}], "}"}], ",", 
     RowBox[{"{", 
      RowBox[{
      "0.53`", ",", "0.3`", ",", "0.952639`", ",", "0.971342`", ",", 
       "0.456305`", ",", "0.393309`"}], "}"}], ",", 
     RowBox[{"{", 
      RowBox[{
      "0.53`", ",", "0.325`", ",", "0.948767`", ",", "0.975321`", ",", 
       "0.466349`", ",", "0.401227`"}], "}"}], ",", 
     RowBox[{"{", 
      RowBox[{
      "0.53`", ",", "0.35`", ",", "0.946394`", ",", "0.980375`", ",", 
       "0.475379`", ",", "0.408257`"}], "}"}], ",", 
     RowBox[{"{", 
      RowBox[{
      "0.53`", ",", "0.375`", ",", "0.942822`", ",", "0.984977`", ",", 
       "0.485057`", ",", "0.414575`"}], "}"}], ",", 
     RowBox[{"{", 
      RowBox[{
      "0.53`", ",", "0.4`", ",", "0.940687`", ",", "0.988617`", ",", 
       "0.495508`", ",", "0.423125`"}], "}"}], ",", 
     RowBox[{"{", 
      RowBox[{
      "0.53`", ",", "0.425`", ",", "0.938042`", ",", "0.989116`", ",", 
       "0.507735`", ",", "0.432751`"}], "}"}], ",", 
     RowBox[{"{", 
      RowBox[{
      "0.53`", ",", "0.45`", ",", "0.934779`", ",", "0.990308`", ",", 
       "0.514377`", ",", "0.436297`"}], "}"}], ",", 
     RowBox[{"{", 
      RowBox[{
      "0.53`", ",", "0.475`", ",", "0.931913`", ",", "0.989243`", ",", 
       "0.524148`", ",", "0.443691`"}], "}"}], ",", 
     RowBox[{"{", 
      RowBox[{
      "0.53`", ",", "0.5`", ",", "0.930465`", ",", "0.989553`", ",", 
       "0.531782`", ",", "0.450681`"}], "}"}], ",", 
     RowBox[{"{", 
      RowBox[{
      "0.54`", ",", "0.`", ",", "0.956865`", ",", "0.992575`", ",", 
       "0.0967153`", ",", "0.0834574`"}], "}"}], ",", 
     RowBox[{"{", 
      RowBox[{
      "0.54`", ",", "0.025`", ",", "0.985939`", ",", "0.99021`", ",", 
       "0.147089`", ",", "0.11957`"}], "}"}], ",", 
     RowBox[{"{", 
      RowBox[{
      "0.54`", ",", "0.05`", ",", "0.9891`", ",", "0.98442`", ",", 
       "0.218747`", ",", "0.185709`"}], "}"}], ",", 
     RowBox[{"{", 
      RowBox[{
      "0.54`", ",", "0.075`", ",", "0.986842`", ",", "0.976255`", ",", 
       "0.271312`", ",", "0.231478`"}], "}"}], ",", 
     RowBox[{"{", 
      RowBox[{
      "0.54`", ",", "0.1`", ",", "0.982882`", ",", "0.964553`", ",", 
       "0.315538`", ",", "0.267378`"}], "}"}], ",", 
     RowBox[{"{", 
      RowBox[{
      "0.54`", ",", "0.125`", ",", "0.978026`", ",", "0.959875`", ",", 
       "0.350707`", ",", "0.297502`"}], "}"}], ",", 
     RowBox[{"{", 
      RowBox[{
      "0.54`", ",", "0.15`", ",", "0.974035`", ",", "0.958501`", ",", 
       "0.375461`", ",", "0.320518`"}], "}"}], ",", 
     RowBox[{"{", 
      RowBox[{
      "0.54`", ",", "0.175`", ",", "0.969758`", ",", "0.957862`", ",", 
       "0.394345`", ",", "0.337976`"}], "}"}], ",", 
     RowBox[{"{", 
      RowBox[{
      "0.54`", ",", "0.2`", ",", "0.966836`", ",", "0.95929`", ",", 
       "0.410853`", ",", "0.354459`"}], "}"}], ",", 
     RowBox[{"{", 
      RowBox[{
      "0.54`", ",", "0.225`", ",", "0.963638`", ",", "0.961008`", ",", 
       "0.423286`", ",", "0.366044`"}], "}"}], ",", 
     RowBox[{"{", 
      RowBox[{
      "0.54`", ",", "0.25`", ",", "0.960157`", ",", "0.963467`", ",", 
       "0.433477`", ",", "0.375173`"}], "}"}], ",", 
     RowBox[{"{", 
      RowBox[{
      "0.54`", ",", "0.275`", ",", "0.956402`", ",", "0.967124`", ",", 
       "0.445508`", ",", "0.384941`"}], "}"}], ",", 
     RowBox[{"{", 
      RowBox[{
      "0.54`", ",", "0.3`", ",", "0.952634`", ",", "0.971514`", ",", 
       "0.45773`", ",", "0.394795`"}], "}"}], ",", 
     RowBox[{"{", 
      RowBox[{
      "0.54`", ",", "0.325`", ",", "0.94891`", ",", "0.97597`", ",", 
       "0.466261`", ",", "0.401325`"}], "}"}], ",", 
     RowBox[{"{", 
      RowBox[{
      "0.54`", ",", "0.35`", ",", "0.945661`", ",", "0.979546`", ",", 
       "0.47599`", ",", "0.408`"}], "}"}], ",", 
     RowBox[{"{", 
      RowBox[{
      "0.54`", ",", "0.375`", ",", "0.943188`", ",", "0.983659`", ",", 
       "0.484625`", ",", "0.415268`"}], "}"}], ",", 
     RowBox[{"{", 
      RowBox[{
      "0.54`", ",", "0.4`", ",", "0.940191`", ",", "0.987647`", ",", 
       "0.494454`", ",", "0.421458`"}], "}"}], ",", 
     RowBox[{"{", 
      RowBox[{
      "0.54`", ",", "0.425`", ",", "0.938438`", ",", "0.989306`", ",", 
       "0.503979`", ",", "0.429725`"}], "}"}], ",", 
     RowBox[{"{", 
      RowBox[{
      "0.54`", ",", "0.45`", ",", "0.935099`", ",", "0.990331`", ",", 
       "0.514726`", ",", "0.436762`"}], "}"}], ",", 
     RowBox[{"{", 
      RowBox[{
      "0.54`", ",", "0.475`", ",", "0.932247`", ",", "0.989562`", ",", 
       "0.524599`", ",", "0.444689`"}], "}"}], ",", 
     RowBox[{"{", 
      RowBox[{
      "0.54`", ",", "0.5`", ",", "0.931351`", ",", "0.988989`", ",", 
       "0.52752`", ",", "0.447446`"}], "}"}], ",", 
     RowBox[{"{", 
      RowBox[{
      "0.55`", ",", "0.`", ",", "0.963316`", ",", "0.993515`", ",", 
       "0.101313`", ",", "0.0857798`"}], "}"}], ",", 
     RowBox[{"{", 
      RowBox[{
      "0.55`", ",", "0.025`", ",", "0.986346`", ",", "0.990336`", ",", 
       "0.148677`", ",", "0.120859`"}], "}"}], ",", 
     RowBox[{"{", 
      RowBox[{
      "0.55`", ",", "0.05`", ",", "0.989069`", ",", "0.984584`", ",", 
       "0.2193`", ",", "0.186102`"}], "}"}], ",", 
     RowBox[{"{", 
      RowBox[{
      "0.55`", ",", "0.075`", ",", "0.986464`", ",", "0.976493`", ",", 
       "0.272957`", ",", "0.232609`"}], "}"}], ",", 
     RowBox[{"{", 
      RowBox[{
      "0.55`", ",", "0.1`", ",", "0.982699`", ",", "0.965039`", ",", 
       "0.315573`", ",", "0.266913`"}], "}"}], ",", 
     RowBox[{"{", 
      RowBox[{
      "0.55`", ",", "0.125`", ",", "0.977403`", ",", "0.960455`", ",", 
       "0.352083`", ",", "0.298076`"}], "}"}], ",", 
     RowBox[{"{", 
      RowBox[{
      "0.55`", ",", "0.15`", ",", "0.973484`", ",", "0.958562`", ",", 
       "0.378293`", ",", "0.32292`"}], "}"}], ",", 
     RowBox[{"{", 
      RowBox[{
      "0.55`", ",", "0.175`", ",", "0.97004`", ",", "0.957795`", ",", 
       "0.395019`", ",", "0.339084`"}], "}"}], ",", 
     RowBox[{"{", 
      RowBox[{
      "0.55`", ",", "0.2`", ",", "0.966626`", ",", "0.959416`", ",", 
       "0.409001`", ",", "0.352068`"}], "}"}], ",", 
     RowBox[{"{", 
      RowBox[{
      "0.55`", ",", "0.225`", ",", "0.963375`", ",", "0.9611`", ",", 
       "0.424143`", ",", "0.366326`"}], "}"}], ",", 
     RowBox[{"{", 
      RowBox[{
      "0.55`", ",", "0.25`", ",", "0.960406`", ",", "0.963694`", ",", 
       "0.43449`", ",", "0.375635`"}], "}"}], ",", 
     RowBox[{"{", 
      RowBox[{
      "0.55`", ",", "0.275`", ",", "0.956803`", ",", "0.966772`", ",", 
       "0.444026`", ",", "0.38378`"}], "}"}], ",", 
     RowBox[{"{", 
      RowBox[{
      "0.55`", ",", "0.3`", ",", "0.9539`", ",", "0.971433`", ",", 
       "0.457108`", ",", "0.395646`"}], "}"}], ",", 
     RowBox[{"{", 
      RowBox[{
      "0.55`", ",", "0.325`", ",", "0.949612`", ",", "0.975427`", ",", 
       "0.464797`", ",", "0.400301`"}], "}"}], ",", 
     RowBox[{"{", 
      RowBox[{
      "0.55`", ",", "0.35`", ",", "0.946823`", ",", "0.97995`", ",", 
       "0.474549`", ",", "0.407933`"}], "}"}], ",", 
     RowBox[{"{", 
      RowBox[{
      "0.55`", ",", "0.375`", ",", "0.943032`", ",", "0.98413`", ",", 
       "0.483367`", ",", "0.41343`"}], "}"}], ",", 
     RowBox[{"{", 
      RowBox[{
      "0.55`", ",", "0.4`", ",", "0.940204`", ",", "0.988272`", ",", 
       "0.496101`", ",", "0.423657`"}], "}"}], ",", 
     RowBox[{"{", 
      RowBox[{
      "0.55`", ",", "0.425`", ",", "0.938466`", ",", "0.98925`", ",", 
       "0.504408`", ",", "0.43041`"}], "}"}], ",", 
     RowBox[{"{", 
      RowBox[{
      "0.55`", ",", "0.45`", ",", "0.935948`", ",", "0.990551`", ",", 
       "0.514964`", ",", "0.438377`"}], "}"}], ",", 
     RowBox[{"{", 
      RowBox[{
      "0.55`", ",", "0.475`", ",", "0.93286`", ",", "0.989209`", ",", 
       "0.522063`", ",", "0.442427`"}], "}"}], ",", 
     RowBox[{"{", 
      RowBox[{
      "0.55`", ",", "0.5`", ",", "0.930896`", ",", "0.989692`", ",", 
       "0.530384`", ",", "0.449578`"}], "}"}], ",", 
     RowBox[{"{", 
      RowBox[{
      "0.56`", ",", "0.`", ",", "0.965333`", ",", "0.994403`", ",", 
       "0.103164`", ",", "0.0873143`"}], "}"}], ",", 
     RowBox[{"{", 
      RowBox[{
      "0.56`", ",", "0.025`", ",", "0.985984`", ",", "0.990436`", ",", 
       "0.149663`", ",", "0.122007`"}], "}"}], ",", 
     RowBox[{"{", 
      RowBox[{
      "0.56`", ",", "0.05`", ",", "0.98931`", ",", "0.984683`", ",", 
       "0.221497`", ",", "0.188373`"}], "}"}], ",", 
     RowBox[{"{", 
      RowBox[{
      "0.56`", ",", "0.075`", ",", "0.986283`", ",", "0.976769`", ",", 
       "0.273964`", ",", "0.232774`"}], "}"}], ",", 
     RowBox[{"{", 
      RowBox[{
      "0.56`", ",", "0.1`", ",", "0.983032`", ",", "0.964714`", ",", 
       "0.315736`", ",", "0.26687`"}], "}"}], ",", 
     RowBox[{"{", 
      RowBox[{
      "0.56`", ",", "0.125`", ",", "0.977771`", ",", "0.960233`", ",", 
       "0.351472`", ",", "0.297248`"}], "}"}], ",", 
     RowBox[{"{", 
      RowBox[{
      "0.56`", ",", "0.15`", ",", "0.974027`", ",", "0.958251`", ",", 
       "0.376669`", ",", "0.321243`"}], "}"}], ",", 
     RowBox[{"{", 
      RowBox[{
      "0.56`", ",", "0.175`", ",", "0.970485`", ",", "0.957399`", ",", 
       "0.394956`", ",", "0.339126`"}], "}"}], ",", 
     RowBox[{"{", 
      RowBox[{
      "0.56`", ",", "0.2`", ",", "0.967216`", ",", "0.959146`", ",", 
       "0.412382`", ",", "0.35628`"}], "}"}], ",", 
     RowBox[{"{", 
      RowBox[{
      "0.56`", ",", "0.225`", ",", "0.963908`", ",", "0.960535`", ",", 
       "0.42391`", ",", "0.366754`"}], "}"}], ",", 
     RowBox[{"{", 
      RowBox[{
      "0.56`", ",", "0.25`", ",", "0.960115`", ",", "0.963754`", ",", 
       "0.435844`", ",", "0.376891`"}], "}"}], ",", 
     RowBox[{"{", 
      RowBox[{
      "0.56`", ",", "0.275`", ",", "0.956969`", ",", "0.966119`", ",", 
       "0.443003`", ",", "0.383108`"}], "}"}], ",", 
     RowBox[{"{", 
      RowBox[{
      "0.56`", ",", "0.3`", ",", "0.953526`", ",", "0.9702`", ",", 
       "0.456387`", ",", "0.394564`"}], "}"}], ",", 
     RowBox[{"{", 
      RowBox[{
      "0.56`", ",", "0.325`", ",", "0.950396`", ",", "0.97497`", ",", 
       "0.467318`", ",", "0.403179`"}], "}"}], ",", 
     RowBox[{"{", 
      RowBox[{
      "0.56`", ",", "0.35`", ",", "0.947227`", ",", "0.978556`", ",", 
       "0.474829`", ",", "0.407974`"}], "}"}], ",", 
     RowBox[{"{", 
      RowBox[{
      "0.56`", ",", "0.375`", ",", "0.944137`", ",", "0.983343`", ",", 
       "0.484978`", ",", "0.416474`"}], "}"}], ",", 
     RowBox[{"{", 
      RowBox[{
      "0.56`", ",", "0.4`", ",", "0.94142`", ",", "0.987306`", ",", 
       "0.493829`", ",", "0.42209`"}], "}"}], ",", 
     RowBox[{"{", 
      RowBox[{
      "0.56`", ",", "0.425`", ",", "0.937497`", ",", "0.988772`", ",", 
       "0.504839`", ",", "0.42947`"}], "}"}], ",", 
     RowBox[{"{", 
      RowBox[{
      "0.56`", ",", "0.45`", ",", "0.934825`", ",", "0.989594`", ",", 
       "0.515607`", ",", "0.438214`"}], "}"}], ",", 
     RowBox[{"{", 
      RowBox[{
      "0.56`", ",", "0.475`", ",", "0.932942`", ",", "0.989805`", ",", 
       "0.522815`", ",", "0.443412`"}], "}"}], ",", 
     RowBox[{"{", 
      RowBox[{
      "0.56`", ",", "0.5`", ",", "0.931526`", ",", "0.989095`", ",", 
       "0.529412`", ",", "0.448841`"}], "}"}], ",", 
     RowBox[{"{", 
      RowBox[{
      "0.57`", ",", "0.`", ",", "0.965607`", ",", "0.993552`", ",", 
       "0.103934`", ",", "0.0887671`"}], "}"}], ",", 
     RowBox[{"{", 
      RowBox[{
      "0.57`", ",", "0.025`", ",", "0.986441`", ",", "0.990292`", ",", 
       "0.150295`", ",", "0.12262`"}], "}"}], ",", 
     RowBox[{"{", 
      RowBox[{
      "0.57`", ",", "0.05`", ",", "0.989517`", ",", "0.984672`", ",", 
       "0.222095`", ",", "0.18919`"}], "}"}], ",", 
     RowBox[{"{", 
      RowBox[{
      "0.57`", ",", "0.075`", ",", "0.986272`", ",", "0.977264`", ",", 
       "0.274383`", ",", "0.233531`"}], "}"}], ",", 
     RowBox[{"{", 
      RowBox[{
      "0.57`", ",", "0.1`", ",", "0.982466`", ",", "0.964719`", ",", 
       "0.317753`", ",", "0.268011`"}], "}"}], ",", 
     RowBox[{"{", 
      RowBox[{
      "0.57`", ",", "0.125`", ",", "0.977715`", ",", "0.960737`", ",", 
       "0.353776`", ",", "0.29933`"}], "}"}], ",", 
     RowBox[{"{", 
      RowBox[{
      "0.57`", ",", "0.15`", ",", "0.974108`", ",", "0.957907`", ",", 
       "0.377801`", ",", "0.322325`"}], "}"}], ",", 
     RowBox[{"{", 
      RowBox[{
      "0.57`", ",", "0.175`", ",", "0.97009`", ",", "0.957541`", ",", 
       "0.396588`", ",", "0.340378`"}], "}"}], ",", 
     RowBox[{"{", 
      RowBox[{
      "0.57`", ",", "0.2`", ",", "0.967041`", ",", "0.958888`", ",", 
       "0.411572`", ",", "0.355157`"}], "}"}], ",", 
     RowBox[{"{", 
      RowBox[{
      "0.57`", ",", "0.225`", ",", "0.963406`", ",", "0.960082`", ",", 
       "0.423881`", ",", "0.366377`"}], "}"}], ",", 
     RowBox[{"{", 
      RowBox[{
      "0.57`", ",", "0.25`", ",", "0.960912`", ",", "0.963776`", ",", 
       "0.436708`", ",", "0.378811`"}], "}"}], ",", 
     RowBox[{"{", 
      RowBox[{
      "0.57`", ",", "0.275`", ",", "0.957254`", ",", "0.965887`", ",", 
       "0.445322`", ",", "0.385301`"}], "}"}], ",", 
     RowBox[{"{", 
      RowBox[{
      "0.57`", ",", "0.3`", ",", "0.953836`", ",", "0.970419`", ",", 
       "0.455134`", ",", "0.393173`"}], "}"}], ",", 
     RowBox[{"{", 
      RowBox[{
      "0.57`", ",", "0.325`", ",", "0.951007`", ",", "0.973816`", ",", 
       "0.466682`", ",", "0.403441`"}], "}"}], ",", 
     RowBox[{"{", 
      RowBox[{
      "0.57`", ",", "0.35`", ",", "0.946894`", ",", "0.978702`", ",", 
       "0.476212`", ",", "0.409845`"}], "}"}], ",", 
     RowBox[{"{", 
      RowBox[{
      "0.57`", ",", "0.375`", ",", "0.944808`", ",", "0.982877`", ",", 
       "0.486394`", ",", "0.4184`"}], "}"}], ",", 
     RowBox[{"{", 
      RowBox[{
      "0.57`", ",", "0.4`", ",", "0.941822`", ",", "0.986868`", ",", 
       "0.495229`", ",", "0.424536`"}], "}"}], ",", 
     RowBox[{"{", 
      RowBox[{
      "0.57`", ",", "0.425`", ",", "0.93849`", ",", "0.988456`", ",", 
       "0.502983`", ",", "0.428927`"}], "}"}], ",", 
     RowBox[{"{", 
      RowBox[{
      "0.57`", ",", "0.45`", ",", "0.936826`", ",", "0.990784`", ",", 
       "0.513325`", ",", "0.437293`"}], "}"}], ",", 
     RowBox[{"{", 
      RowBox[{
      "0.57`", ",", "0.475`", ",", "0.934127`", ",", "0.989292`", ",", 
       "0.520118`", ",", "0.44172`"}], "}"}], ",", 
     RowBox[{"{", 
      RowBox[{
      "0.57`", ",", "0.5`", ",", "0.931486`", ",", "0.989234`", ",", 
       "0.529442`", ",", "0.449238`"}], "}"}], ",", 
     RowBox[{"{", 
      RowBox[{
      "0.58`", ",", "0.`", ",", "0.963263`", ",", "0.993837`", ",", 
       "0.105572`", ",", "0.0912768`"}], "}"}], ",", 
     RowBox[{"{", 
      RowBox[{
      "0.58`", ",", "0.025`", ",", "0.986873`", ",", "0.990277`", ",", 
       "0.151772`", ",", "0.124383`"}], "}"}], ",", 
     RowBox[{"{", 
      RowBox[{
      "0.58`", ",", "0.05`", ",", "0.989642`", ",", "0.984866`", ",", 
       "0.221513`", ",", "0.188834`"}], "}"}], ",", 
     RowBox[{"{", 
      RowBox[{
      "0.58`", ",", "0.075`", ",", "0.986562`", ",", "0.976948`", ",", 
       "0.275535`", ",", "0.235003`"}], "}"}], ",", 
     RowBox[{"{", 
      RowBox[{
      "0.58`", ",", "0.1`", ",", "0.982366`", ",", "0.964615`", ",", 
       "0.317787`", ",", "0.268315`"}], "}"}], ",", 
     RowBox[{"{", 
      RowBox[{
      "0.58`", ",", "0.125`", ",", "0.977855`", ",", "0.96081`", ",", 
       "0.351416`", ",", "0.296971`"}], "}"}], ",", 
     RowBox[{"{", 
      RowBox[{
      "0.58`", ",", "0.15`", ",", "0.973572`", ",", "0.958048`", ",", 
       "0.378745`", ",", "0.322713`"}], "}"}], ",", 
     RowBox[{"{", 
      RowBox[{
      "0.58`", ",", "0.175`", ",", "0.970433`", ",", "0.957553`", ",", 
       "0.397356`", ",", "0.340511`"}], "}"}], ",", 
     RowBox[{"{", 
      RowBox[{
      "0.58`", ",", "0.2`", ",", "0.966742`", ",", "0.958766`", ",", 
       "0.412836`", ",", "0.355918`"}], "}"}], ",", 
     RowBox[{"{", 
      RowBox[{
      "0.58`", ",", "0.225`", ",", "0.963961`", ",", "0.960126`", ",", 
       "0.42633`", ",", "0.368953`"}], "}"}], ",", 
     RowBox[{"{", 
      RowBox[{
      "0.58`", ",", "0.25`", ",", "0.960839`", ",", "0.963442`", ",", 
       "0.437792`", ",", "0.379505`"}], "}"}], ",", 
     RowBox[{"{", 
      RowBox[{
      "0.58`", ",", "0.275`", ",", "0.957486`", ",", "0.965649`", ",", 
       "0.444039`", ",", "0.384514`"}], "}"}], ",", 
     RowBox[{"{", 
      RowBox[{
      "0.58`", ",", "0.3`", ",", "0.953686`", ",", "0.969652`", ",", 
       "0.458759`", ",", "0.396574`"}], "}"}], ",", 
     RowBox[{"{", 
      RowBox[{
      "0.58`", ",", "0.325`", ",", "0.950398`", ",", "0.973262`", ",", 
       "0.465702`", ",", "0.401908`"}], "}"}], ",", 
     RowBox[{"{", 
      RowBox[{
      "0.58`", ",", "0.35`", ",", "0.947169`", ",", "0.978682`", ",", 
       "0.47419`", ",", "0.408118`"}], "}"}], ",", 
     RowBox[{"{", 
      RowBox[{
      "0.58`", ",", "0.375`", ",", "0.944902`", ",", "0.983339`", ",", 
       "0.483422`", ",", "0.415583`"}], "}"}], ",", 
     RowBox[{"{", 
      RowBox[{
      "0.58`", ",", "0.4`", ",", "0.941758`", ",", "0.987038`", ",", 
       "0.494036`", ",", "0.423171`"}], "}"}], ",", 
     RowBox[{"{", 
      RowBox[{
      "0.58`", ",", "0.425`", ",", "0.939199`", ",", "0.988873`", ",", 
       "0.503092`", ",", "0.429703`"}], "}"}], ",", 
     RowBox[{"{", 
      RowBox[{
      "0.58`", ",", "0.45`", ",", "0.935563`", ",", "0.99002`", ",", 
       "0.51128`", ",", "0.434518`"}], "}"}], ",", 
     RowBox[{"{", 
      RowBox[{
      "0.58`", ",", "0.475`", ",", "0.933519`", ",", "0.989433`", ",", 
       "0.522081`", ",", "0.443769`"}], "}"}], ",", 
     RowBox[{"{", 
      RowBox[{
      "0.58`", ",", "0.5`", ",", "0.931926`", ",", "0.989258`", ",", 
       "0.530781`", ",", "0.45078`"}], "}"}], ",", 
     RowBox[{"{", 
      RowBox[{
      "0.59`", ",", "0.`", ",", "0.953082`", ",", "0.992976`", ",", 
       "0.109071`", ",", "0.0930045`"}], "}"}], ",", 
     RowBox[{"{", 
      RowBox[{
      "0.59`", ",", "0.025`", ",", "0.987125`", ",", "0.990342`", ",", 
       "0.151106`", ",", "0.123431`"}], "}"}], ",", 
     RowBox[{"{", 
      RowBox[{
      "0.59`", ",", "0.05`", ",", "0.989296`", ",", "0.98452`", ",", 
       "0.22242`", ",", "0.18891`"}], "}"}], ",", 
     RowBox[{"{", 
      RowBox[{
      "0.59`", ",", "0.075`", ",", "0.986661`", ",", "0.976966`", ",", 
       "0.275647`", ",", "0.234988`"}], "}"}], ",", 
     RowBox[{"{", 
      RowBox[{
      "0.59`", ",", "0.1`", ",", "0.982261`", ",", "0.964509`", ",", 
       "0.321055`", ",", "0.270784`"}], "}"}], ",", 
     RowBox[{"{", 
      RowBox[{
      "0.59`", ",", "0.125`", ",", "0.9778`", ",", "0.96055`", ",", 
       "0.353566`", ",", "0.298655`"}], "}"}], ",", 
     RowBox[{"{", 
      RowBox[{
      "0.59`", ",", "0.15`", ",", "0.974146`", ",", "0.958279`", ",", 
       "0.380006`", ",", "0.323922`"}], "}"}], ",", 
     RowBox[{"{", 
      RowBox[{
      "0.59`", ",", "0.175`", ",", "0.970935`", ",", "0.957787`", ",", 
       "0.396002`", ",", "0.339327`"}], "}"}], ",", 
     RowBox[{"{", 
      RowBox[{
      "0.59`", ",", "0.2`", ",", "0.966899`", ",", "0.958942`", ",", 
       "0.412586`", ",", "0.355534`"}], "}"}], ",", 
     RowBox[{"{", 
      RowBox[{
      "0.59`", ",", "0.225`", ",", "0.964313`", ",", "0.960333`", ",", 
       "0.425656`", ",", "0.368217`"}], "}"}], ",", 
     RowBox[{"{", 
      RowBox[{
      "0.59`", ",", "0.25`", ",", "0.961353`", ",", "0.962517`", ",", 
       "0.434985`", ",", "0.377118`"}], "}"}], ",", 
     RowBox[{"{", 
      RowBox[{
      "0.59`", ",", "0.275`", ",", "0.957675`", ",", "0.965763`", ",", 
       "0.447343`", ",", "0.387523`"}], "}"}], ",", 
     RowBox[{"{", 
      RowBox[{
      "0.59`", ",", "0.3`", ",", "0.953977`", ",", "0.969773`", ",", 
       "0.455279`", ",", "0.394125`"}], "}"}], ",", 
     RowBox[{"{", 
      RowBox[{
      "0.59`", ",", "0.325`", ",", "0.951303`", ",", "0.973604`", ",", 
       "0.465522`", ",", "0.402116`"}], "}"}], ",", 
     RowBox[{"{", 
      RowBox[{
      "0.59`", ",", "0.35`", ",", "0.947874`", ",", "0.97838`", ",", 
       "0.474544`", ",", "0.408914`"}], "}"}], ",", 
     RowBox[{"{", 
      RowBox[{
      "0.59`", ",", "0.375`", ",", "0.944295`", ",", "0.982361`", ",", 
       "0.482647`", ",", "0.41379`"}], "}"}], ",", 
     RowBox[{"{", 
      RowBox[{
      "0.59`", ",", "0.4`", ",", "0.941575`", ",", "0.98717`", ",", 
       "0.496118`", ",", "0.425071`"}], "}"}], ",", 
     RowBox[{"{", 
      RowBox[{
      "0.59`", ",", "0.425`", ",", "0.940173`", ",", "0.98904`", ",", 
       "0.500953`", ",", "0.428193`"}], "}"}], ",", 
     RowBox[{"{", 
      RowBox[{
      "0.59`", ",", "0.45`", ",", "0.93602`", ",", "0.989793`", ",", 
       "0.51322`", ",", "0.436668`"}], "}"}], ",", 
     RowBox[{"{", 
      RowBox[{
      "0.59`", ",", "0.475`", ",", "0.935401`", ",", "0.989599`", ",", 
       "0.518396`", ",", "0.441511`"}], "}"}], ",", 
     RowBox[{"{", 
      RowBox[{
      "0.59`", ",", "0.5`", ",", "0.931983`", ",", "0.989251`", ",", 
       "0.527265`", ",", "0.44749`"}], "}"}], ",", 
     RowBox[{"{", 
      RowBox[{
      "0.6`", ",", "0.`", ",", "0.958567`", ",", "0.993712`", ",", 
       "0.112953`", ",", "0.0983393`"}], "}"}], ",", 
     RowBox[{"{", 
      RowBox[{
      "0.6`", ",", "0.025`", ",", "0.986893`", ",", "0.990396`", ",", 
       "0.15315`", ",", "0.125312`"}], "}"}], ",", 
     RowBox[{"{", 
      RowBox[{
      "0.6`", ",", "0.05`", ",", "0.989908`", ",", "0.984374`", ",", 
       "0.222563`", ",", "0.190442`"}], "}"}], ",", 
     RowBox[{"{", 
      RowBox[{
      "0.6`", ",", "0.075`", ",", "0.987284`", ",", "0.975213`", ",", 
       "0.275286`", ",", "0.234499`"}], "}"}], ",", 
     RowBox[{"{", 
      RowBox[{
      "0.6`", ",", "0.1`", ",", "0.982475`", ",", "0.96412`", ",", "0.32075`",
        ",", "0.270551`"}], "}"}], ",", 
     RowBox[{"{", 
      RowBox[{
      "0.6`", ",", "0.125`", ",", "0.977692`", ",", "0.960672`", ",", 
       "0.352923`", ",", "0.297868`"}], "}"}], ",", 
     RowBox[{"{", 
      RowBox[{
      "0.6`", ",", "0.15`", ",", "0.97337`", ",", "0.958133`", ",", 
       "0.379529`", ",", "0.322957`"}], "}"}], ",", 
     RowBox[{"{", 
      RowBox[{
      "0.6`", ",", "0.175`", ",", "0.971184`", ",", "0.957257`", ",", 
       "0.398145`", ",", "0.341837`"}], "}"}], ",", 
     RowBox[{"{", 
      RowBox[{
      "0.6`", ",", "0.2`", ",", "0.967881`", ",", "0.958556`", ",", 
       "0.411427`", ",", "0.355443`"}], "}"}], ",", 
     RowBox[{"{", 
      RowBox[{
      "0.6`", ",", "0.225`", ",", "0.964167`", ",", "0.95985`", ",", 
       "0.426627`", ",", "0.369732`"}], "}"}], ",", 
     RowBox[{"{", 
      RowBox[{
      "0.6`", ",", "0.25`", ",", "0.961174`", ",", "0.962699`", ",", 
       "0.435929`", ",", "0.377876`"}], "}"}], ",", 
     RowBox[{"{", 
      RowBox[{
      "0.6`", ",", "0.275`", ",", "0.957201`", ",", "0.964995`", ",", 
       "0.443166`", ",", "0.382654`"}], "}"}], ",", 
     RowBox[{"{", 
      RowBox[{
      "0.6`", ",", "0.3`", ",", "0.954483`", ",", "0.969103`", ",", 
       "0.456611`", ",", "0.395172`"}], "}"}], ",", 
     RowBox[{"{", 
      RowBox[{
      "0.6`", ",", "0.325`", ",", "0.95141`", ",", "0.972556`", ",", 
       "0.462971`", ",", "0.400004`"}], "}"}], ",", 
     RowBox[{"{", 
      RowBox[{
      "0.6`", ",", "0.35`", ",", "0.948196`", ",", "0.978183`", ",", 
       "0.475858`", ",", "0.410206`"}], "}"}], ",", 
     RowBox[{"{", 
      RowBox[{
      "0.6`", ",", "0.375`", ",", "0.944458`", ",", "0.982459`", ",", 
       "0.483725`", ",", "0.415354`"}], "}"}], ",", 
     RowBox[{"{", 
      RowBox[{
      "0.6`", ",", "0.4`", ",", "0.941741`", ",", "0.986264`", ",", 
       "0.491401`", ",", "0.420258`"}], "}"}], ",", 
     RowBox[{"{", 
      RowBox[{
      "0.6`", ",", "0.425`", ",", "0.939276`", ",", "0.987917`", ",", 
       "0.50351`", ",", "0.430264`"}], "}"}], ",", 
     RowBox[{"{", 
      RowBox[{
      "0.6`", ",", "0.45`", ",", "0.937088`", ",", "0.989959`", ",", 
       "0.513412`", ",", "0.437786`"}], "}"}], ",", 
     RowBox[{"{", 
      RowBox[{
      "0.6`", ",", "0.475`", ",", "0.934542`", ",", "0.989792`", ",", 
       "0.521504`", ",", "0.444033`"}], "}"}], ",", 
     RowBox[{"{", 
      RowBox[{
      "0.6`", ",", "0.5`", ",", "0.933069`", ",", "0.989358`", ",", 
       "0.526268`", ",", "0.447589`"}], "}"}], ",", 
     RowBox[{"{", 
      RowBox[{
      "0.61`", ",", "0.`", ",", "0.960808`", ",", "0.993927`", ",", 
       "0.114968`", ",", "0.101337`"}], "}"}], ",", 
     RowBox[{"{", 
      RowBox[{
      "0.61`", ",", "0.025`", ",", "0.986776`", ",", "0.990445`", ",", 
       "0.153535`", ",", "0.125666`"}], "}"}], ",", 
     RowBox[{"{", 
      RowBox[{
      "0.61`", ",", "0.05`", ",", "0.989839`", ",", "0.983569`", ",", 
       "0.223165`", ",", "0.190355`"}], "}"}], ",", 
     RowBox[{"{", 
      RowBox[{
      "0.61`", ",", "0.075`", ",", "0.98664`", ",", "0.974089`", ",", 
       "0.277446`", ",", "0.235766`"}], "}"}], ",", 
     RowBox[{"{", 
      RowBox[{
      "0.61`", ",", "0.1`", ",", "0.982453`", ",", "0.964262`", ",", 
       "0.32018`", ",", "0.270137`"}], "}"}], ",", 
     RowBox[{"{", 
      RowBox[{
      "0.61`", ",", "0.125`", ",", "0.977802`", ",", "0.960928`", ",", 
       "0.354145`", ",", "0.298897`"}], "}"}], ",", 
     RowBox[{"{", 
      RowBox[{
      "0.61`", ",", "0.15`", ",", "0.973401`", ",", "0.957631`", ",", 
       "0.380957`", ",", "0.324253`"}], "}"}], ",", 
     RowBox[{"{", 
      RowBox[{
      "0.61`", ",", "0.175`", ",", "0.97026`", ",", "0.957304`", ",", 
       "0.398384`", ",", "0.341083`"}], "}"}], ",", 
     RowBox[{"{", 
      RowBox[{
      "0.61`", ",", "0.2`", ",", "0.967813`", ",", "0.957973`", ",", 
       "0.411281`", ",", "0.354153`"}], "}"}], ",", 
     RowBox[{"{", 
      RowBox[{
      "0.61`", ",", "0.225`", ",", "0.963947`", ",", "0.959815`", ",", 
       "0.424045`", ",", "0.366468`"}], "}"}], ",", 
     RowBox[{"{", 
      RowBox[{
      "0.61`", ",", "0.25`", ",", "0.960922`", ",", "0.962043`", ",", 
       "0.438175`", ",", "0.380039`"}], "}"}], ",", 
     RowBox[{"{", 
      RowBox[{
      "0.61`", ",", "0.275`", ",", "0.957845`", ",", "0.965394`", ",", 
       "0.447335`", ",", "0.387691`"}], "}"}], ",", 
     RowBox[{"{", 
      RowBox[{
      "0.61`", ",", "0.3`", ",", "0.954819`", ",", "0.96847`", ",", 
       "0.454983`", ",", "0.394328`"}], "}"}], ",", 
     RowBox[{"{", 
      RowBox[{
      "0.61`", ",", "0.325`", ",", "0.951643`", ",", "0.973373`", ",", 
       "0.464754`", ",", "0.401779`"}], "}"}], ",", 
     RowBox[{"{", 
      RowBox[{
      "0.61`", ",", "0.35`", ",", "0.948233`", ",", "0.977532`", ",", 
       "0.474482`", ",", "0.409394`"}], "}"}], ",", 
     RowBox[{"{", 
      RowBox[{
      "0.61`", ",", "0.375`", ",", "0.944655`", ",", "0.98183`", ",", 
       "0.484025`", ",", "0.415823`"}], "}"}], ",", 
     RowBox[{"{", 
      RowBox[{
      "0.61`", ",", "0.4`", ",", "0.942457`", ",", "0.986001`", ",", 
       "0.49261`", ",", "0.422023`"}], "}"}], ",", 
     RowBox[{"{", 
      RowBox[{
      "0.61`", ",", "0.425`", ",", "0.938933`", ",", "0.988413`", ",", 
       "0.500087`", ",", "0.426715`"}], "}"}], ",", 
     RowBox[{"{", 
      RowBox[{
      "0.61`", ",", "0.45`", ",", "0.936756`", ",", "0.989197`", ",", 
       "0.511977`", ",", "0.436295`"}], "}"}], ",", 
     RowBox[{"{", 
      RowBox[{
      "0.61`", ",", "0.475`", ",", "0.934676`", ",", "0.989747`", ",", 
       "0.520202`", ",", "0.442218`"}], "}"}], ",", 
     RowBox[{"{", 
      RowBox[{
      "0.61`", ",", "0.5`", ",", "0.93187`", ",", "0.989253`", ",", 
       "0.52915`", ",", "0.449065`"}], "}"}], ",", 
     RowBox[{"{", 
      RowBox[{
      "0.62`", ",", "0.`", ",", "0.963813`", ",", "0.994126`", ",", 
       "0.115192`", ",", "0.102143`"}], "}"}], ",", 
     RowBox[{"{", 
      RowBox[{
      "0.62`", ",", "0.025`", ",", "0.98716`", ",", "0.990611`", ",", 
       "0.155008`", ",", "0.127594`"}], "}"}], ",", 
     RowBox[{"{", 
      RowBox[{
      "0.62`", ",", "0.05`", ",", "0.989732`", ",", "0.983574`", ",", 
       "0.223247`", ",", "0.189923`"}], "}"}], ",", 
     RowBox[{"{", 
      RowBox[{
      "0.62`", ",", "0.075`", ",", "0.986969`", ",", "0.973374`", ",", 
       "0.277132`", ",", "0.235549`"}], "}"}], ",", 
     RowBox[{"{", 
      RowBox[{
      "0.62`", ",", "0.1`", ",", "0.982613`", ",", "0.963671`", ",", 
       "0.323388`", ",", "0.272723`"}], "}"}], ",", 
     RowBox[{"{", 
      RowBox[{
      "0.62`", ",", "0.125`", ",", "0.977447`", ",", "0.960679`", ",", 
       "0.357414`", ",", "0.301633`"}], "}"}], ",", 
     RowBox[{"{", 
      RowBox[{
      "0.62`", ",", "0.15`", ",", "0.973596`", ",", "0.958201`", ",", 
       "0.381455`", ",", "0.324072`"}], "}"}], ",", 
     RowBox[{"{", 
      RowBox[{
      "0.62`", ",", "0.175`", ",", "0.97057`", ",", "0.957478`", ",", 
       "0.400334`", ",", "0.34281`"}], "}"}], ",", 
     RowBox[{"{", 
      RowBox[{
      "0.62`", ",", "0.2`", ",", "0.967677`", ",", "0.958209`", ",", 
       "0.413843`", ",", "0.356724`"}], "}"}], ",", 
     RowBox[{"{", 
      RowBox[{
      "0.62`", ",", "0.225`", ",", "0.965088`", ",", "0.959666`", ",", 
       "0.423893`", ",", "0.366928`"}], "}"}], ",", 
     RowBox[{"{", 
      RowBox[{
      "0.62`", ",", "0.25`", ",", "0.961821`", ",", "0.96234`", ",", 
       "0.437501`", ",", "0.379726`"}], "}"}], ",", 
     RowBox[{"{", 
      RowBox[{
      "0.62`", ",", "0.275`", ",", "0.95854`", ",", "0.964859`", ",", 
       "0.446097`", ",", "0.387086`"}], "}"}], ",", 
     RowBox[{"{", 
      RowBox[{
      "0.62`", ",", "0.3`", ",", "0.95553`", ",", "0.968792`", ",", 
       "0.456204`", ",", "0.395732`"}], "}"}], ",", 
     RowBox[{"{", 
      RowBox[{
      "0.62`", ",", "0.325`", ",", "0.951765`", ",", "0.972641`", ",", 
       "0.464783`", ",", "0.401856`"}], "}"}], ",", 
     RowBox[{"{", 
      RowBox[{
      "0.62`", ",", "0.35`", ",", "0.948544`", ",", "0.97691`", ",", 
       "0.473215`", ",", "0.408418`"}], "}"}], ",", 
     RowBox[{"{", 
      RowBox[{
      "0.62`", ",", "0.375`", ",", "0.946284`", ",", "0.981478`", ",", 
       "0.483924`", ",", "0.417578`"}], "}"}], ",", 
     RowBox[{"{", 
      RowBox[{
      "0.62`", ",", "0.4`", ",", "0.942458`", ",", "0.985629`", ",", 
       "0.492472`", ",", "0.422346`"}], "}"}], ",", 
     RowBox[{"{", 
      RowBox[{
      "0.62`", ",", "0.425`", ",", "0.939381`", ",", "0.988131`", ",", 
       "0.501619`", ",", "0.429004`"}], "}"}], ",", 
     RowBox[{"{", 
      RowBox[{
      "0.62`", ",", "0.45`", ",", "0.936975`", ",", "0.98992`", ",", 
       "0.509071`", ",", "0.433712`"}], "}"}], ",", 
     RowBox[{"{", 
      RowBox[{
      "0.62`", ",", "0.475`", ",", "0.935274`", ",", "0.989886`", ",", 
       "0.52004`", ",", "0.442925`"}], "}"}], ",", 
     RowBox[{"{", 
      RowBox[{
      "0.62`", ",", "0.5`", ",", "0.933384`", ",", "0.98932`", ",", 
       "0.528889`", ",", "0.450966`"}], "}"}], ",", 
     RowBox[{"{", 
      RowBox[{
      "0.63`", ",", "0.`", ",", "0.965715`", ",", "0.993609`", ",", 
       "0.116664`", ",", "0.102945`"}], "}"}], ",", 
     RowBox[{"{", 
      RowBox[{
      "0.63`", ",", "0.025`", ",", "0.986798`", ",", "0.99044`", ",", 
       "0.15538`", ",", "0.128146`"}], "}"}], ",", 
     RowBox[{"{", 
      RowBox[{
      "0.63`", ",", "0.05`", ",", "0.989593`", ",", "0.983729`", ",", 
       "0.224674`", ",", "0.191732`"}], "}"}], ",", 
     RowBox[{"{", 
      RowBox[{
      "0.63`", ",", "0.075`", ",", "0.987001`", ",", "0.972999`", ",", 
       "0.279062`", ",", "0.237771`"}], "}"}], ",", 
     RowBox[{"{", 
      RowBox[{
      "0.63`", ",", "0.1`", ",", "0.98219`", ",", "0.963822`", ",", 
       "0.323289`", ",", "0.271795`"}], "}"}], ",", 
     RowBox[{"{", 
      RowBox[{
      "0.63`", ",", "0.125`", ",", "0.977457`", ",", "0.960529`", ",", 
       "0.356895`", ",", "0.300626`"}], "}"}], ",", 
     RowBox[{"{", 
      RowBox[{
      "0.63`", ",", "0.15`", ",", "0.973723`", ",", "0.957478`", ",", 
       "0.381263`", ",", "0.323938`"}], "}"}], ",", 
     RowBox[{"{", 
      RowBox[{
      "0.63`", ",", "0.175`", ",", "0.970689`", ",", "0.957227`", ",", 
       "0.398624`", ",", "0.341664`"}], "}"}], ",", 
     RowBox[{"{", 
      RowBox[{
      "0.63`", ",", "0.2`", ",", "0.96812`", ",", "0.958015`", ",", 
       "0.414639`", ",", "0.358198`"}], "}"}], ",", 
     RowBox[{"{", 
      RowBox[{
      "0.63`", ",", "0.225`", ",", "0.964775`", ",", "0.959482`", ",", 
       "0.423718`", ",", "0.366356`"}], "}"}], ",", 
     RowBox[{"{", 
      RowBox[{
      "0.63`", ",", "0.25`", ",", "0.961456`", ",", "0.961898`", ",", 
       "0.435016`", ",", "0.376952`"}], "}"}], ",", 
     RowBox[{"{", 
      RowBox[{
      "0.63`", ",", "0.275`", ",", "0.959277`", ",", "0.964058`", ",", 
       "0.445091`", ",", "0.386779`"}], "}"}], ",", 
     RowBox[{"{", 
      RowBox[{
      "0.63`", ",", "0.3`", ",", "0.954992`", ",", "0.96819`", ",", 
       "0.454247`", ",", "0.393451`"}], "}"}], ",", 
     RowBox[{"{", 
      RowBox[{
      "0.63`", ",", "0.325`", ",", "0.951836`", ",", "0.971911`", ",", 
       "0.465236`", ",", "0.402513`"}], "}"}], ",", 
     RowBox[{"{", 
      RowBox[{
      "0.63`", ",", "0.35`", ",", "0.948717`", ",", "0.976662`", ",", 
       "0.474656`", ",", "0.410236`"}], "}"}], ",", 
     RowBox[{"{", 
      RowBox[{
      "0.63`", ",", "0.375`", ",", "0.945347`", ",", "0.981`", ",", 
       "0.482794`", ",", "0.415206`"}], "}"}], ",", 
     RowBox[{"{", 
      RowBox[{
      "0.63`", ",", "0.4`", ",", "0.942336`", ",", "0.985677`", ",", 
       "0.491747`", ",", "0.42192`"}], "}"}], ",", 
     RowBox[{"{", 
      RowBox[{
      "0.63`", ",", "0.425`", ",", "0.940407`", ",", "0.987786`", ",", 
       "0.504153`", ",", "0.431763`"}], "}"}], ",", 
     RowBox[{"{", 
      RowBox[{
      "0.63`", ",", "0.45`", ",", "0.937115`", ",", "0.989494`", ",", 
       "0.510196`", ",", "0.434928`"}], "}"}], ",", 
     RowBox[{"{", 
      RowBox[{
      "0.63`", ",", "0.475`", ",", "0.934538`", ",", "0.989526`", ",", 
       "0.519054`", ",", "0.441592`"}], "}"}], ",", 
     RowBox[{"{", 
      RowBox[{
      "0.63`", ",", "0.5`", ",", "0.933331`", ",", "0.989287`", ",", 
       "0.527536`", ",", "0.449061`"}], "}"}], ",", 
     RowBox[{"{", 
      RowBox[{
      "0.64`", ",", "0.`", ",", "0.9645`", ",", "0.994594`", ",", "0.118232`",
        ",", "0.105075`"}], "}"}], ",", 
     RowBox[{"{", 
      RowBox[{
      "0.64`", ",", "0.025`", ",", "0.987103`", ",", "0.990527`", ",", 
       "0.15638`", ",", "0.129216`"}], "}"}], ",", 
     RowBox[{"{", 
      RowBox[{
      "0.64`", ",", "0.05`", ",", "0.989565`", ",", "0.983351`", ",", 
       "0.227013`", ",", "0.193465`"}], "}"}], ",", 
     RowBox[{"{", 
      RowBox[{
      "0.64`", ",", "0.075`", ",", "0.986803`", ",", "0.972445`", ",", 
       "0.282011`", ",", "0.239983`"}], "}"}], ",", 
     RowBox[{"{", 
      RowBox[{
      "0.64`", ",", "0.1`", ",", "0.982364`", ",", "0.963695`", ",", 
       "0.323331`", ",", "0.271814`"}], "}"}], ",", 
     RowBox[{"{", 
      RowBox[{
      "0.64`", ",", "0.125`", ",", "0.977435`", ",", "0.960366`", ",", 
       "0.359203`", ",", "0.302535`"}], "}"}], ",", 
     RowBox[{"{", 
      RowBox[{
      "0.64`", ",", "0.15`", ",", "0.97434`", ",", "0.957776`", ",", 
       "0.381534`", ",", "0.324739`"}], "}"}], ",", 
     RowBox[{"{", 
      RowBox[{
      "0.64`", ",", "0.175`", ",", "0.971027`", ",", "0.957091`", ",", 
       "0.398116`", ",", "0.341132`"}], "}"}], ",", 
     RowBox[{"{", 
      RowBox[{
      "0.64`", ",", "0.2`", ",", "0.968418`", ",", "0.957763`", ",", 
       "0.413714`", ",", "0.357034`"}], "}"}], ",", 
     RowBox[{"{", 
      RowBox[{
      "0.64`", ",", "0.225`", ",", "0.965119`", ",", "0.959236`", ",", 
       "0.425648`", ",", "0.36894`"}], "}"}], ",", 
     RowBox[{"{", 
      RowBox[{
[truncated: 554,269 more chars]
